# Supplementary material
Source: ML conference proceedings conference paper supplement (https://proceedings.neurips.cc/paper_files/paper/2023/hash/a2a544e43acb8b954dc5846ff0d77ad5-Abstract.html)
Supplement: Supplementary file 1 [file a2a544e43acb8b954dc5846ff0d77ad5-Supplemental-Datasets_and_Benchmarks.pdf]

---

# Benchmarking Robustness of Adaptation Methods on Pre-trained Vision-Language Models (Supplementary)

---

**Shuo Chen<sup>1,3\*</sup> Jindong Gu<sup>2\*</sup> Zhen Han<sup>1†</sup> Yunpu Ma<sup>1,3</sup> Philip Torr<sup>2</sup> Volker Tresp<sup>1,4</sup>**  
<sup>1</sup>Institute of Informatics, LMU Munich <sup>2</sup>Department of Engineering Science, University of Oxford  
<sup>3</sup> Siemens AG <sup>4</sup>Munich Center for Machine Learning (MCML)  
shuo.chen@campus.lmu.de, jindong.gu@eng.ox.ac.uk, hanzhen02111@163.com

## 1 Contents

|   |                                                                         |          |
|---|-------------------------------------------------------------------------|----------|
| 2 | <b>1 Additional Analysis</b>                                            | <b>2</b> |
| 3 | 1.1 BART vs. T5 language backbone . . . . .                             | 2        |
| 4 | 1.2 The Influence of Adaptation Hyperparameters on Robustness . . . . . | 3        |
| 5 | 1.3 Additional Results . . . . .                                        | 4        |

---

\*equal contribution

†corresponding author

Table 1: Relative robustness of adaptation methods based on CLIP-T5 against image (top) and text (bottom) corruptions.

| Adaptation method   | VQAv2   |                    | GQA     |                    | NLVR <sup>2</sup> |                    | COCO Caption |                    |
|---------------------|---------|--------------------|---------|--------------------|-------------------|--------------------|--------------|--------------------|
|                     | Acc (%) | RR (%)             | Acc (%) | RR (%)             | Acc (%)           | RR (%)             | CIDEr        | RR (%)             |
| Full Fine-tuning    | 66.29   | 85.11±5.10         | 56.82   | 87.48±0.04         | 74.06             | 89.36±0.04         | 111.50       | 69.32±0.14         |
| Multiple Adapters   | 66.15   | 85.45±4.84         | 55.66   | 87.70±0.04         | 51.94             | –                  | 112.15       | 67.65±0.15         |
| Single Adapter      | 66.41   | 85.19±5.16         | 55.90   | 78.57±0.04         | 72.78             | 88.70±0.05         | 111.70       | 68.52±0.14         |
| Hyperformer         | 65.18   | <b>86.02</b> ±4.87 | 54.65   | <b>89.33</b> ±0.04 | 70.56             | <b>91.07</b> ±0.05 | 110.65       | <b>70.48</b> ±0.13 |
| Multiple Compacters | 65.50   | 85.88±4.86         | 54.68   | 88.09±0.04         | 52.63             | –                  | 113.20       | 67.96±0.14         |
| Single Compacter    | 65.98   | 85.56±5.07         | 55.33   | 80.57±0.04         | 71.47             | 90.04±0.04         | 111.61       | 69.15±0.14         |

  

| Adaptation Method   | VQAv2   |                     | GQA     |                     | NLVR <sup>2</sup> |                     |
|---------------------|---------|---------------------|---------|---------------------|-------------------|---------------------|
|                     | Acc (%) | RR (%)              | Acc (%) | RR (%)              | Acc (%)           | RR (%)              |
| Full fine-tuning    | 66.29   | 72.52±25.29         | 56.82   | 64.27±25.75         | 74.06             | 87.67±10.74         |
| Multiple Adapters   | 66.15   | <b>76.68</b> ±21.21 | 55.66   | 62.33±25.92         | 51.94             | –                   |
| Single Adapter      | 66.41   | 75.89±21.20         | 55.90   | 63.30±19.40         | 72.78             | 87.79±10.68         |
| Hyperformer         | 65.18   | 76.51±20.80         | 54.65   | 66.96±24.43         | 70.56             | <b>89.12</b> ±10.06 |
| Multiple Compacters | 65.50   | 76.39±21.14         | 54.68   | <b>67.66</b> ±22.69 | 52.63             | –                   |
| Single Compacter    | 65.98   | 76.16±21.16         | 55.33   | 64.19±20.22         | 71.47             | 88.70±9.93          |

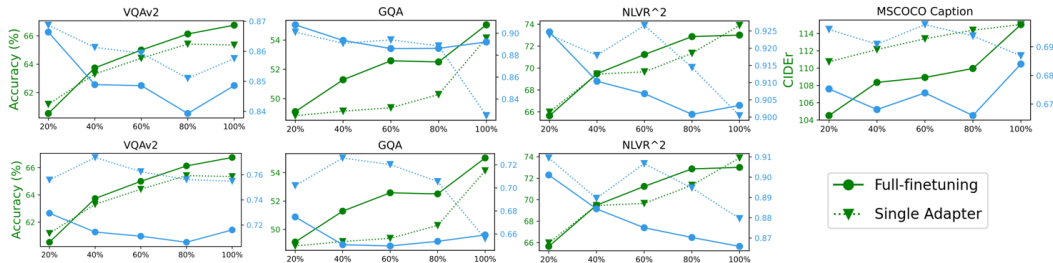

Figure 1: Performance and relative robustness of full-finetuning and single adapter on CLIP-BART given different size of adaptation dataset. The first row shows results given image corruptions and the second is from text corruptions. Green lines stand for performance in each task and the blue is robustness. X-axis shows the random subset ratio of training dataset during adaptation, ranging from 20% to 100%.

## 6 1 Additional Analysis

### 7 1.1 BART vs. T5 language backbone

8 We compared the robustness of CLIP-BART and CLIP-T5 models in Table 2 to observe differences in  
9 performance. Generally, adaptations from CLIP-BART showed better robustness on GQA, NLVR<sup>2</sup>,  
10 and COCO Caption against image and text corruptions. Specifically, all adaptation methods on CLIP-  
11 BART had higher robustness against text corruptions on the GQA dataset. For robustness against  
12 image corruptions, all adaptation methods with CLIP-BART, except for multiple adapters, achieved  
13 higher relative robustness scores. In contrast, CLIP-T5-based adaptations were more robust against  
14 image corruptions on VQAv2, while CLIP-BART showed more robustness against text corruptions.  
15 This may be due to the different language encoders used in BART and T5. Among all adaptation  
16 methods, Hyperformer seems to be a good choice for CLIP-T5, as it achieved better robustness on  
17 VQAv2, NLVR<sup>2</sup>, and COCO Caption. A single adapter would likely be a more robust adaptation  
18 method when combined with CLIP-BART, as it showed better robustness on all datasets and against  
19 both types of corruption.

Table 2: RR(%) of adaptation methods based on CLIP-BART and CLIP-T5 against image (up) and text (down) corruptions with severity 5. The better relative robustness values for each comparison pair are in bold.

| Adaptation Method   | VQAv2        |              | GQA          |              | NLVR <sup>2</sup> |              | COCO Caption |              |
|---------------------|--------------|--------------|--------------|--------------|-------------------|--------------|--------------|--------------|
|                     | BART         | T5           | BART         | T5           | BART              | T5           | BART         | T5           |
| Full finetuning     | 84.86        | <b>85.11</b> | <b>89.20</b> | 87.48        | <b>90.34</b>      | 89.36        | 68.40        | <b>69.32</b> |
| Multiple adapters   | 85.33        | <b>85.45</b> | 86.16        | <b>87.70</b> | <b>92.02</b>      | –            | <b>68.72</b> | 67.65        |
| Single adapter      | <b>85.76</b> | 85.19        | <b>82.49</b> | 78.57        | <b>90.04</b>      | 88.70        | <b>68.68</b> | 68.52        |
| Hyperformer         | 85.38        | <b>86.02</b> | <b>90.05</b> | 89.33        | 90.13             | <b>91.07</b> | 68.74        | <b>70.48</b> |
| Multiple compacters | 85.65        | <b>85.88</b> | <b>88.89</b> | 88.09        | <b>91.33</b>      | –            | <b>68.67</b> | 67.96        |
| Single compacter    | 85.47        | <b>85.56</b> | <b>82.62</b> | 80.57        | <b>92.04</b>      | 90.04        | <b>69.92</b> | 69.15        |

| Adaptation method   | VQAv2        |              | GQA          |       | NLVR <sup>2</sup> |              |
|---------------------|--------------|--------------|--------------|-------|-------------------|--------------|
|                     | BART         | T5           | BART         | T5    | BART              | T5           |
| Full Fine-tuning    | <b>73.65</b> | 72.52        | <b>66.92</b> | 64.27 | 87.06             | <b>87.67</b> |
| Multiple Adapters   | 76.62        | <b>76.68</b> | <b>66.93</b> | 62.33 | <b>90.14</b>      | –            |
| Single Adapter      | <b>77.64</b> | 75.89        | <b>67.47</b> | 63.30 | <b>88.49</b>      | 87.79        |
| Hyperformer         | 75.06        | <b>76.51</b> | <b>70.30</b> | 66.96 | 87.27             | <b>89.12</b> |
| Multiple Compacters | <b>77.10</b> | 76.39        | <b>67.39</b> | 67.66 | <b>90.00</b>      | –            |
| Single Compacter    | <b>77.17</b> | 76.16        | <b>67.90</b> | 64.19 | <b>90.10</b>      | 88.7         |

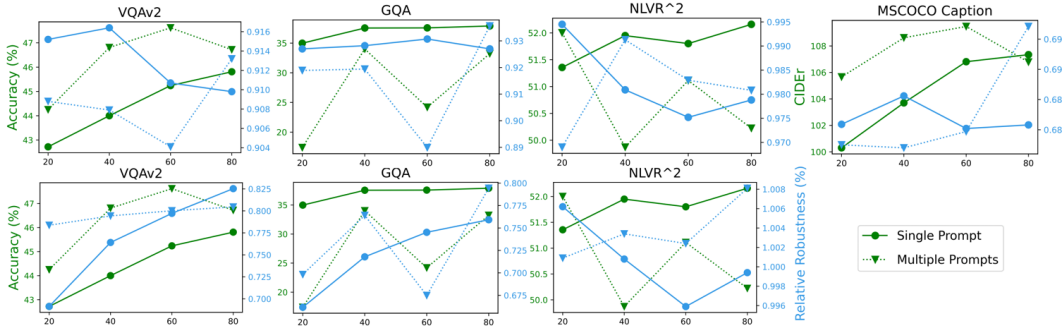

Figure 2: Performance and relative robustness from prompt adaptations with different prompt lengths on CLIP-BART. The top row shows the robustness against image corruptions and the bottom row is results against text corruptions. Blue lines stand for performance on each task and green lines represent relative robustness.

## 20 1.2 The Influence of Adaptation Hyperparameters on Robustness

21 To investigate the influence of parameter size on robustness, we conduct experiments on 6 adaptation  
 22 methods, namely Single Prompt, Multiple Prompts, Single Adapter, Single Compacter, and Single  
 23 LoRA, with various parameter sizes. For each setting, we adapt the model on multitask datasets given  
 24 pre-trained CLIP and BART (T5) and test the relative robustness.

25 For prompt tuning, the prompt length  $p$  defined in Section ?? can be 20, 40, 60, and 80. The  
 26 position of prompt embedding can be *front*, *middle*, and *back*. It specifies the prompt position in  
 27 the concatenated input to the encoder-decoder generative model. For example, *front* position means  
 28 that the prompt embedding is at the beginning of the concatenation; *middle* position means the  
 29 concatenation starts with visual embedding, then prompt embedding and the textual embedding  
 30 is at the end. We also choose different embedding dimensions for adapter-based methods. The  
 31 dimension  $d_1$  of adapter layers varies from {96, 64, 48, 24}. The dimension  $r$  of LoRA’s low-rank  
 32 decomposition layer can be {32, 64, 128, 256}

Table 3: Relative robustness of adaptation methods based on CLIP-BART against image corruptions.

| Adaptation method    | Noise   |         |          |        |         |               |         |        |        |          | Blur    |          |         |          |         |          |        |        |        |            | Digital |       |  |  |  |  |  |  |  |  | Weather |  |  |  | Ave | RR |
|----------------------|---------|---------|----------|--------|---------|---------------|---------|--------|--------|----------|---------|----------|---------|----------|---------|----------|--------|--------|--------|------------|---------|-------|--|--|--|--|--|--|--|--|---------|--|--|--|-----|----|
|                      | Clean   | Impulse | Gaussian | Shot   | Speckle | Zoom          | Defocus | Motion | Glass  | Gaussian | JPEG    | Contrast | Elastic | Pixelate | Spatter | Saturate | Snow   | Frost  | Fog    | Brightness | Ave     | RR    |  |  |  |  |  |  |  |  |         |  |  |  |     |    |
| Full Finetuning      | 115.03  | 81.17   | 81.35    | 85.44  | 94.18   | <b>37.14</b>  | 86.8    | 75.71  | 65.06  | 83.06    | 101.57  | 64.22    | 71.91   | 62.17    | 72      | 98.52    | 72.51  | 71.96  | 84.94  | 105.19     | 78.68   | 0.684 |  |  |  |  |  |  |  |  |         |  |  |  |     |    |
| Multiple Adapters    | 114.47  | 80.382  | 80.15    | 83.148 | 93.994  | <b>38.745</b> | 86.249  | 76.844 | 67.18  | 82.54    | 101.351 | 63.33    | 71.333  | 60.88    | 73.135  | 98.585   | 71.467 | 73.985 | 85.879 | 105.201    | 78.66   | 0.687 |  |  |  |  |  |  |  |  |         |  |  |  |     |    |
| Half-shared Adapters | 114.5   | 79.944  | 79.987   | 84.561 | 93.942  | <b>36.509</b> | 85.722  | 75.587 | 66.158 | 82.182   | 100.892 | 62.498   | 72.542  | 60.165   | 74.231  | 98.81    | 72.11  | 72.363 | 85.265 | 105.799    | 78.38   | 0.685 |  |  |  |  |  |  |  |  |         |  |  |  |     |    |
| Single Adapter       | 115.038 | 80.804  | 79.906   | 84.103 | 94.777  | <b>39.022</b> | 86.771  | 76.413 | 67.248 | 82.81    | 100.003 | 63.395   | 72.09   | 62.762   | 74.194  | 99.028   | 72.54  | 73.265 | 86.301 | 105.832    | 79.01   | 0.687 |  |  |  |  |  |  |  |  |         |  |  |  |     |    |
| Hyperformer          | 114.868 | 81.486  | 81.184   | 84.695 | 94.778  | <b>38.876</b> | 87.22   | 77.358 | 65.7   | 83.811   | 100.726 | 63.684   | 71.187  | 61.52    | 72.977  | 98.137   | 72.182 | 72.184 | 86.937 | 105.541    | 78.96   | 0.687 |  |  |  |  |  |  |  |  |         |  |  |  |     |    |
| Multiple Compacters  | 115.16  | 80.384  | 81.537   | 84.001 | 93.927  | <b>40.35</b>  | 86.581  | 77.254 | 66.264 | 83.457   | 100.487 | 64.146   | 72.066  | 61.457   | 73.753  | 98.307   | 71.873 | 73.236 | 87.801 | 105.852    | 79.08   | 0.687 |  |  |  |  |  |  |  |  |         |  |  |  |     |    |
| Single Compacter     | 113.06  | 81.779  | 80.075   | 83.994 | 93.597  | <b>42.833</b> | 85.97   | 77.867 | 67.299 | 82.556   | 99.625  | 63.003   | 71.916  | 60.521   | 74.435  | 97.933   | 71.843 | 74.022 | 87.75  | 104.961    | 79.09   | 0.699 |  |  |  |  |  |  |  |  |         |  |  |  |     |    |
| Multiple LoRA        | 115.407 | 80.405  | 80.375   | 84.802 | 94.76   | <b>37.083</b> | 87.011  | 77.123 | 67.137 | 83.624   | 100.765 | 63.069   | 71.88   | 60.501   | 74.051  | 99.355   | 72.661 | 73.329 | 87.289 | 106.065    | 79.01   | 0.685 |  |  |  |  |  |  |  |  |         |  |  |  |     |    |
| Single LoRA          | 114.543 | 81.349  | 81.511   | 85.88  | 93.202  | <b>41.466</b> | 85.975  | 76.136 | 67.718 | 82.823   | 100.427 | 64.944   | 72.111  | 61.093   | 74.293  | 99.632   | 72.42  | 73.498 | 87.241 | 105.519    | 79.33   | 0.686 |  |  |  |  |  |  |  |  |         |  |  |  |     |    |
| Single Prompt        | 103.7   | 72.487  | 72.331   | 75.718 | 84.932  | <b>40.531</b> | 76.78   | 70.319 | 58.32  | 73.44    | 89.506  | 58.412   | 64.682  | 52.919   | 66.092  | 89.98    | 64.575 | 66.29  | 78.047 | 106.626    | 71.1    | 0.686 |  |  |  |  |  |  |  |  |         |  |  |  |     |    |
| Multiple Prompts     | 108.619 | 75.508  | 74.45    | 78.38  | 87.429  | <b>41.641</b> | 81.407  | 72.983 | 59.526 | 77.612   | 92.618  | 58.532   | 65.953  | 53.735   | 67.949  | 93.914   | 65.299 | 66.277 | 80.86  | 100.67     | 73.53   | 0.677 |  |  |  |  |  |  |  |  |         |  |  |  |     |    |

  

| Adaptation method    | Noise |         |          |        |         |               |         |        |        |          | Blur   |          |         |          |         |          |        |        |        |            | Digital |       |  |  |  |  |  |  |  |  | Weather |  |  |  | Ave | RR |
|----------------------|-------|---------|----------|--------|---------|---------------|---------|--------|--------|----------|--------|----------|---------|----------|---------|----------|--------|--------|--------|------------|---------|-------|--|--|--|--|--|--|--|--|---------|--|--|--|-----|----|
|                      | Clean | Impulse | Gaussian | Shot   | Speckle | Zoom          | Defocus | Motion | Glass  | Gaussian | JPEG   | Contrast | Elastic | Pixelate | Spatter | Saturate | Snow   | Frost  | Fog    | Brightness | Ave     | RR    |  |  |  |  |  |  |  |  |         |  |  |  |     |    |
| Full Finetuning      | 55.04 | 49.15   | 49.03    | 49.82  | 51.44   | <b>47.2</b>   | 50.55   | 50.31  | 46.66  | 49.94    | 52.66  | 46.19    | 47.14   | 45.89    | 48.44   | 50.97    | 47.2   | 47.86  | 49.72  | 52.67      | 49.1    | 0.892 |  |  |  |  |  |  |  |  |         |  |  |  |     |    |
| Multiple Adapters    | 53.39 | 46.557  | 46.279   | 46.796 | 48.315  | <b>40.825</b> | 47.623  | 46.828 | 44.244 | 46.51    | 49.412 | 43.83    | 44.323  | 43.425   | 45.134  | 48.664   | 44.705 | 44.88  | 46.965 | 49.626     | 46      | 0.862 |  |  |  |  |  |  |  |  |         |  |  |  |     |    |
| Half-shared Adapters | 52.96 | 47.949  | 47.742   | 48.076 | 49.563  | <b>42.821</b> | 48.911  | 48.601 | 45.238 | 47.822   | 50.7   | 44.975   | 46.454  | 43.838   | 46.899  | 49.261   | 46.041 | 46.502 | 47.519 | 50.358     | 47.33   | 0.894 |  |  |  |  |  |  |  |  |         |  |  |  |     |    |
| Single Adapter       | 54.14 | 45.031  | 44.864   | 45.58  | 47.702  | <b>39.911</b> | 46.192  | 46.041 | 42.821 | 45.349   | 47.869 | 41.294   | 42.932  | 41.517   | 43.481  | 46.796   | 43.505 | 43.505 | 45.868 | 48.744     | 44.66   | 0.825 |  |  |  |  |  |  |  |  |         |  |  |  |     |    |
| Hyperformer          | 52.52 | 47.806  | 47.925   | 47.694 | 49.428  | <b>43.226</b> | 48.752  | 47.798 | 45.595 | 47.941   | 50.334 | 45.007   | 45.58   | 44.061   | 46.724  | 49.404   | 46.335 | 47.019 | 47.13  | 50.803     | 47.29   | 0.9   |  |  |  |  |  |  |  |  |         |  |  |  |     |    |
| Multiple Compacters  | 52.75 | 47.527  | 47.098   | 47.146 | 48.895  | <b>42.129</b> | 48.799  | 47.678 | 44.467 | 48.227   | 50.294 | 45.341   | 45.222  | 43.894   | 46.51   | 48.768   | 45.921 | 46.287 | 46.979 | 49.674     | 46.89   | 0.889 |  |  |  |  |  |  |  |  |         |  |  |  |     |    |
| Single Compacter     | 52.9  | 44.371  | 44.403   | 44.864 | 46.088  | <b>39.402</b> | 45.111  | 44.315 | 41.573 | 44.244   | 47.066 | 41.016   | 42.248  | 40.301   | 42.471  | 46.104   | 42.232 | 42.781 | 44.522 | 47.329     | 43.71   | 0.826 |  |  |  |  |  |  |  |  |         |  |  |  |     |    |
| Multiple LoRA        | 52.05 | 48.052  | 47.837   | 47.655 | 49.253  | <b>43.886</b> | 49.404  | 48.998 | 46.152 | 48.41    | 50.262 | 45.23    | 46.065  | 44.101   | 46.589  | 48.927   | 45.595 | 46.74  | 47.686 | 50.564     | 47.44   | 0.911 |  |  |  |  |  |  |  |  |         |  |  |  |     |    |
| Single LoRA          | 53.19 | 44.618  | 43.93    | 45.039 | 46.716  | <b>38.973</b> | 45.723  | 44.363 | 42.145 | 44.761   | 46.86  | 41.183   | 42.24   | 40.754   | 43.433  | 46.438   | 42.686 | 42.956 | 44.571 | 47.297     | 43.92   | 0.826 |  |  |  |  |  |  |  |  |         |  |  |  |     |    |
| Single Prompt        | 37.54 | 35.001  | 35.554   | 38.18  | 36.365  | <b>32.35</b>  | 35.562  | 34.807 | 33.813 | 35.021   | 36.548 | 33.805   | 34.012  | 32.74    | 34.409  | 35.904   | 34.497 | 34.855 | 35.308 | 36.222     | 34.84   | 0.928 |  |  |  |  |  |  |  |  |         |  |  |  |     |    |
| Multiple Prompts     | 34.01 | 31.11   | 31.42    | 31.937 | 32.708  | <b>28.82</b>  | 31.873  | 31.73  | 30.108 | 31.356   | 33.415 | 30.347   | 30.259  | 29.401   | 30.259  | 32.175   | 30.681 | 31.523 | 31.897 | 33.082     | 31.27   | 0.919 |  |  |  |  |  |  |  |  |         |  |  |  |     |    |

  

| Adaptation method    | Noise |         |          |        |         |        |         |        |        |          | Blur   |          |         |          |         |          |        |        |        |            | Digital |       |  |  |  |  |  |  |  |  | Weather |  |  |  | Ave | RR |
|----------------------|-------|---------|----------|--------|---------|--------|---------|--------|--------|----------|--------|----------|---------|----------|---------|----------|--------|--------|--------|------------|---------|-------|--|--|--|--|--|--|--|--|---------|--|--|--|-----|----|
|                      | Clean | Impulse | Gaussian | Shot   | Speckle | Zoom   | Defocus | Motion | Glass  | Gaussian | JPEG   | Contrast | Elastic | Pixelate | Spatter | Saturate | Snow   | Frost  | Fog    | Brightness | Ave     | RR    |  |  |  |  |  |  |  |  |         |  |  |  |     |    |
| Full Finetuning      | 73.01 | 66.16   | 65.81    | 65.73  | 67.53   | 63.93  | 68.14   | 66.58  | 65.92  | 70.7     | 60.45  | 67.51    | 59.53   | 65.81    | 66.75   | 63.92    | 64.54  | 67.11  | 70.13  | 65.96      | 0.903   |       |  |  |  |  |  |  |  |  |         |  |  |  |     |    |
| Multiple Adapters    | 69.41 | 64.504  | 63.801   | 64.174 | 64.978  | 56.509 | 65.753  | 64.475 | 64.303 | 64.992   | 68.222 | 59.15    | 65.294  | 59.079   | 64.03   | 64.461   | 62.552 | 63.643 | 65.71  | 67.935     | 63.87   | 0.92  |  |  |  |  |  |  |  |  |         |  |  |  |     |    |
| Half-shared Adapters | 70.03 | 64.762  | 64.59    | 63.558 | 65.581  | 56.28  | 66.427  | 64.547 | 64.533 | 65.064   | 68.193 | 60.83    | 65.308  | 60.299   | 64.576  | 64.59    | 63.356 | 64.145 | 65.796 | 67.705     | 64.23   | 0.917 |  |  |  |  |  |  |  |  |         |  |  |  |     |    |
| Single Adapter       | 73.89 | 67.203  | 66.915   | 66.743 | 68.839  | 56.222 | 67.647  | 66.686 | 66.7   | 67.188   | 70.92  | 63.112   | 68.179  | 61.016   | 66.284  | 68.179   | 64.849 | 66.384 | 69.901 | 71.15      | 66.53   | 0.9   |  |  |  |  |  |  |  |  |         |  |  |  |     |    |
| Hyperformer          | 72.21 | 66.04   | 65.38    | 65.509 | 66.915  | 55.117 | 66.987  | 65.408 | 65.825 | 65.939   | 69.413 | 60.643   | 65.982  | 60.471   | 65.494  | 66.069   | 63.758 | 65.078 | 67.691 | 68.824     | 65.08   | 0.901 |  |  |  |  |  |  |  |  |         |  |  |  |     |    |
| Multiple Compacters  | 69.45 | 63.873  | 64.49    | 63.959 | 65.451  | 54.428 | 64.447  | 63.672 | 63.643 | 63.801   | 68.064 | 59.466   | 64.748  | 58.045   | 63.844  | 64.389   | 62.48  | 64.806 | 65.606 | 66.571     | 63.43   | 0.913 |  |  |  |  |  |  |  |  |         |  |  |  |     |    |
| Single Compacter     | 69.94 | 65.25   | 65.279   | 64.748 | 66.514  | 55.993 | 66.528  | 64.231 | 63.136 | 64.648   | 68.293 | 60.559   | 65.466  | 58.533   | 64.376  | 65.279   | 63.686 | 64.648 | 66.226 | 67.504     | 64.37   | 0.92  |  |  |  |  |  |  |  |  |         |  |  |  |     |    |
| Multiple LoRA        | 71.32 | 64.849  | 64.892   | 64.948 | 66.431  | 49.821 | 60.251  | 49.333 | 49.031 | 50.567   | 49.275 | 50.754   | 49.49   | 50.954   | 50.911  | 50.151   | 49.835 | 50.553 | 50.84  | 50.01      | 0.974   |       |  |  |  |  |  |  |  |  |         |  |  |  |     |    |
| Single LoRA          | 53.58 | 66.801  | 66.844   | 66.628 | 69.054  | 57.399 | 68.107  | 66.915 | 66.643 | 63.027   | 70.475 | 61.174   | 67.49   | 60.586   | 66.37   | 68.035   | 64.619 | 66.614 | 68.437 | 70.389     | 66.26   | 0.901 |  |  |  |  |  |  |  |  |         |  |  |  |     |    |
| Single Prompt        | 51.95 | 50.754  | 50.725   | 50.452 | 50.581  | 51.371 | 51.902  | 51.873 | 51.313 | 51.744   | 51.414 | 49.677   | 51.285  | 49.548   | 50.696  | 50.983   | 50.007 | 50.811 | 51.213 | 51.816     | 50.96   | 0.981 |  |  |  |  |  |  |  |  |         |  |  |  |     |    |
| Multiple Prompts     | 49.87 | 49.333  | 49.132   | 49.189 | 49.433  | 49.95  | 49.074  | 49.663 | 49.16  | 49.189   | 50.036 | 48.974   | 49.691  | 49.993   | 49.562  | 49.663   | 49.132 | 49.06  | 49.677 | 49.376     | 49.44   | 0.991 |  |  |  |  |  |  |  |  |         |  |  |  |     |    |

  

| Adaptation method    | Noise |         |          |       |         |              |         |        |       |          | Blur  |          |         |          |         |          |       |       |       |            | Digital |       |  |  |  |  |  |  |  |  | Weather |  |  |  | Ave | RR |
|----------------------|-------|---------|----------|-------|---------|--------------|---------|--------|-------|----------|-------|----------|---------|----------|---------|----------|-------|-------|-------|------------|---------|-------|--|--|--|--|--|--|--|--|---------|--|--|--|-----|----|
|                      | Clean | Impulse | Gaussian | Shot  | Speckle | Zoom         | Defocus | Motion | Glass | Gaussian | JPEG  | Contrast | Elastic | Pixelate | Spatter | Saturate | Snow  | Frost | Fog   | Brightness | Ave     | RR    |  |  |  |  |  |  |  |  |         |  |  |  |     |    |
| Full Finetuning      | 66.75 | 56.35   | 56.25    | 57.2  | 59.85   | <b>49.2</b>  | 59.06   | 57.07  | 55.5  | 54.4     | 62.11 | 51.51    | 55.75   | 53.02    | 55.8    | 60.41    | 54.91 | 54.68 | 57.47 | 63.17      | 56.65   | 0.849 |  |  |  |  |  |  |  |  |         |  |  |  |     |    |
| Multiple Adapters    | 65.3  | 55.27   | 55.26    | 56.1  | 58.68   | <b>49.15</b> | 58.27   | 56.7   | 53.63 | 57.38    | 60.82 | 50.5     | 54.88   | 59.13    | 53.75   | 53.83    | 56.36 | 61.34 | 55.72 | 55.83      | 57.52   | 0.853 |  |  |  |  |  |  |  |  |         |  |  |  |     |    |
| Half-shared Adapters | 65.2  | 54.94   | 54.79    | 55.94 | 58.5    | <b>48.42</b> | 57.85   | 56.53  | 53.4  | 56.88    | 60.79 | 50.71    | 54.9    | 52.23    | 55.03   | 59.13    | 53.67 | 53.64 | 56.61 | 61.51      | 55.53   | 0.852 |  |  |  |  |  |  |  |  |         |  |  |  |     |    |
| Single Adapter       | 65.35 | 55.61   | 55.61    | 56.57 | 59.3    | <b>48.37</b> | 58.58   | 56.49  | 53.89 | 57.33    | 61.6  | 50.91    | 55.7    | 52.37    | 54.93   | 59.71    | 54.19 | 54.19 | 57.01 | 62.43      | 56.04   | 0.858 |  |  |  |  |  |  |  |  |         |  |  |  |     |    |
| Hyperformer          | 65.38 | 55.42   | 55.26    | 56.2  | 58.93   | <b>49.38</b> | 58.32   | 56.58  | 53.52 | 57.11    | 61.04 | 50.97    | 55.34   | 52.58    | 54.89   | 59.13    | 54.05 | 53.64 | 56.8  | 61.5       | 55.82   | 0.854 |  |  |  |  |  |  |  |  |         |  |  |  |     |    |
| Multiple Compacters  | 64.91 | 54.97   | 55.18    | 55.66 | 58.45   | <b>48.81</b> | 58.05   | 56.29  | 53.48 | 56.95    | 60.47 | 50.92    | 55.32   | 52.54    | 54.7    | 58.81    | 53.86 | 53.97 | 61.52 | 55.59      | 55.86   | 0.856 |  |  |  |  |  |  |  |  |         |  |  |  |     |    |
| Single Compacter     | 64.47 | 54.78   | 54.69    | 55.68 | 58.11   | <b>48.33</b> | 57.36   | 55.74  | 52.84 | 56.47    | 60.08 | 50.08    | 54.62   | 51.54    | 54.37   | 58.54    | 53.35 | 53.38 | 56.02 | 60.95      | 55.1    | 0.855 |  |  |  |  |  |  |  |  |         |  |  |  |     |    |
| Multiple LoRA        | 65.44 | 55.13   | 55.16    | 55.92 | 58.31   | <b>49.01</b> | 57.89   | 56.37  | 53.04 | 56.61    | 60.7  | 50.83    | 54.78   | 52.18    | 54.47   | 58.83    | 53.44 | 53.4  | 56.28 | 61.39      | 55.48   | 0.848 |  |  |  |  |  |  |  |  |         |  |  |  |     |    |
| Single LoRA          | 65.34 | 54.7    |          |       |         |              |         |        |       |          |       |          |         |          |         |          |       |       |       |            |         |       |  |  |  |  |  |  |  |  |         |  |  |  |     |    |

Table 4: Relative robustness of adaptation methods based on CLIP-BART against text corruptions grouped by corruption levels.

| Adaptation method    | Clean | Char-level | Char-level RR | Word-level | Word-level RR | Sentence-level | Sentence-level RR | Ave RR |
|----------------------|-------|------------|---------------|------------|---------------|----------------|-------------------|--------|
| Full Finetuning      | 55.04 | 23.47      | 0.426         | 37.9       | 0.689         | 52.91          | 0.961             | 0.669  |
| Multiple Adapters    | 53.39 | 23.19      | 0.434         | 37.37      | 0.7           | 48.97          | 0.917             | 0.669  |
| Half-shared Adapters | 52.96 | 22.35      | 0.422         | 38.06      | 0.719         | 50.22          | 0.948             | 0.682  |
| Single Adapter       | 54.14 | 24.11      | 0.445         | 38.54      | 0.712         | 48.18          | 0.89              | 0.675  |
| Hyperformer          | 52.52 | 23.69      | 0.451         | 38.85      | 0.74          | 50.25          | 0.957             | 0.703  |
| Multiple Compacters  | 52.75 | 22.8       | 0.432         | 37.21      | 0.705         | 49.13          | 0.931             | 0.674  |
| Single Compacter     | 52.9  | 23.89      | 0.452         | 37.8       | 0.715         | 47.49          | 0.898             | 0.679  |
| Multiple LoRA        | 52.05 | 22.79      | 0.438         | 37.74      | 0.725         | 48.72          | 0.936             | 0.688  |
| Single LoRA          | 53.19 | 22.94      | 0.431         | 34.98      | 0.658         | 47.12          | 0.886             | 0.639  |
| Single Prompt        | 37.54 | 21.98      | 0.586         | 26.94      | 0.718         | 36             | 0.959             | 0.725  |
| Multiple Prompts     | 34.01 | 19.69      | 0.579         | 27.6       | 0.812         | 31.62          | 0.93              | 0.771  |

  

| Adaptation method    | Clean | Char-level | Char-level RR | Word-level | Word-level RR | Sentence-level | Sentence-level RR | Ave RR |
|----------------------|-------|------------|---------------|------------|---------------|----------------|-------------------|--------|
| Full Finetuning      | 73.01 | 55         | 0.753         | 64.88      | 0.889         | 71.99          | 0.986             | 0.871  |
| Multiple Adapters    | 69.41 | 53.54      | 0.771         | 64.66      | 0.932         | 69.12          | 0.996             | 0.901  |
| Half-shared Adapters | 70.03 | 53.53      | 0.764         | 64.47      | 0.921         | 69.02          | 0.986             | 0.892  |
| Single Adapter       | 73.89 | 56.24      | 0.761         | 67.19      | 0.909         | 73.09          | 0.989             | 0.885  |
| Hyperformer          | 72.21 | 54.24      | 0.751         | 64.59      | 0.894         | 71.02          | 0.984             | 0.873  |
| Multiple Compacters  | 69.45 | 53.84      | 0.775         | 64.54      | 0.929         | 68.67          | 0.989             | 0.9    |
| Single Compacter     | 69.94 | 55.07      | 0.787         | 64.65      | 0.924         | 69.4           | 0.992             | 0.901  |
| Multiple LoRA        | 51.32 | 51.41      | 1.002         | 51.52      | 1.004         | 51.25          | 0.999             | 1.002  |
| Single LoRA          | 73.58 | 55.13      | 0.749         | 66.22      | 0.9           | 72.67          | 0.988             | 0.876  |
| Single Prompt        | 51.95 | 51.87      | 0.998         | 52.01      | 1.001         | 52.1           | 1.003             | 1.001  |
| Multiple Prompts     | 49.87 | 50.1       | 1.005         | 50.1       | 1.005         | 49.84          | 0.999             | 1.004  |

  

| Adaptation method    | Clean | Char-level | Char-level RR | Word-level | Word-level RR | Sentence-level | Sentence-level RR | Ave RR |
|----------------------|-------|------------|---------------|------------|---------------|----------------|-------------------|--------|
| Full Finetuning      | 66.75 | 32.33      | 0.484         | 51.99      | 0.779         | 64.68          | 0.969             | 0.736  |
| Multiple Adapters    | 65.3  | 33.76      | 0.517         | 53.21      | 0.815         | 63.55          | 0.973             | 0.766  |
| Half-shared Adapters | 65.2  | 33.75      | 0.518         | 53.28      | 0.817         | 63.48          | 0.974             | 0.768  |
| Single Adapter       | 65.35 | 33.65      | 0.515         | 54.42      | 0.833         | 63.83          | 0.977             | 0.776  |
| Hyperformer          | 65.38 | 33.52      | 0.513         | 51.6       | 0.789         | 63.69          | 0.974             | 0.751  |
| Multiple Compacters  | 64.91 | 33.63      | 0.518         | 53.38      | 0.822         | 63.27          | 0.975             | 0.771  |
| Single Compacter     | 64.47 | 33.76      | 0.524         | 53.12      | 0.824         | 62.25          | 0.966             | 0.772  |
| Multiple LoRA        | 65.44 | 33.51      | 0.512         | 50.53      | 0.772         | 63.66          | 0.973             | 0.74   |
| Single LoRA          | 65.34 | 32.89      | 0.503         | 51.27      | 0.785         | 63.41          | 0.97              | 0.745  |
| Single Prompt        | 44    | 28.89      | 0.657         | 33.49      | 0.761         | 42.75          | 0.972             | 0.77   |
| Multiple Prompts     | 46.81 | 29.35      | 0.627         | 38.88      | 0.831         | 45.4           | 0.97              | 0.802  |

Table 5: Relative robustness of adaptation methods based on CLIP-BART against image corruptions.

| Adaptation method   | Clean   | Noise   |          |        |         |        |         |        |        |          |        | Blur     |         |          |         |          |        |        |        |            |         | Digital  |      |         |      |         |        |       |          |      |          | Weather |          |         |          |      |       |     |            |         |          | Ave | RR (%) |      |         |      |         |        |       |          |      |          |         |          |         |          |      |       |     |            |         |          |      |         |      |         |        |       |          |      |          |         |          |         |          |
|---------------------|---------|---------|----------|--------|---------|--------|---------|--------|--------|----------|--------|----------|---------|----------|---------|----------|--------|--------|--------|------------|---------|----------|------|---------|------|---------|--------|-------|----------|------|----------|---------|----------|---------|----------|------|-------|-----|------------|---------|----------|-----|--------|------|---------|------|---------|--------|-------|----------|------|----------|---------|----------|---------|----------|------|-------|-----|------------|---------|----------|------|---------|------|---------|--------|-------|----------|------|----------|---------|----------|---------|----------|
|                     |         | Impulse | Gaussian | Shot   | Speckle | Zoom   | Defocus | Motion | Glass  | Gaussian | JPEG   | Contrast | Elastic | Pixelate | Spatter | Saturate | Snow   | Frost  | Fog    | Brightness | Impulse | Gaussian | Shot | Speckle | Zoom | Defocus | Motion | Glass | Gaussian | JPEG | Contrast | Elastic | Pixelate | Spatter | Saturate | Snow | Frost | Fog | Brightness | Impulse | Gaussian |     |        | Shot | Speckle | Zoom | Defocus | Motion | Glass | Gaussian | JPEG | Contrast | Elastic | Pixelate | Spatter | Saturate | Snow | Frost | Fog | Brightness | Impulse | Gaussian | Shot | Speckle | Zoom | Defocus | Motion | Glass | Gaussian | JPEG | Contrast | Elastic | Pixelate | Spatter | Saturate |
| Full Finetuning     | 111.5   | 79.113  | 79.032   | 82.265 | 91.788  | 37.158 | 85.321  | 75.387 | 65.115 | 81.871   | 98.817 | 61.11    | 69.818  | 62.23    | 73.373  | 97.049   | 71.716 | 70.632 | 84.015 | 102.756    | 77.29   | 6.693    |      |         |      |         |        |       |          |      |          |         |          |         |          |      |       |     |            |         |          |     |        |      |         |      |         |        |       |          |      |          |         |          |         |          |      |       |     |            |         |          |      |         |      |         |        |       |          |      |          |         |          |         |          |
| Multiple Adapters   | 112.149 | 79.067  | 78.336   | 82.044 | 91.293  | 33.035 | 83.47   | 73.385 | 63.347 | 81.731   | 98.845 | 59.487   | 67.879  | 59.806   | 70.26   | 96.107   | 69.469 | 68.513 | 82.314 | 103.015    | 75.86   | 0.676    |      |         |      |         |        |       |          |      |          |         |          |         |          |      |       |     |            |         |          |     |        |      |         |      |         |        |       |          |      |          |         |          |         |          |      |       |     |            |         |          |      |         |      |         |        |       |          |      |          |         |          |         |          |
| Single Adapter      | 111.7   | 78.788  | 79.632   | 81.986 | 91.411  | 37.009 | 83.256  | 74.122 | 64.263 | 80.347   | 98.008 | 60.239   | 68.099  | 60.312   | 71.794  | 96.896   | 70.457 | 70.364 | 83.999 | 103.175    | 76.53   | 0.685    |      |         |      |         |        |       |          |      |          |         |          |         |          |      |       |     |            |         |          |     |        |      |         |      |         |        |       |          |      |          |         |          |         |          |      |       |     |            |         |          |      |         |      |         |        |       |          |      |          |         |          |         |          |
| Hyperformer         | 110.649 | 79.968  | 79.361   | 83.399 | 92.835  | 41.287 | 85.348  | 76.428 | 65.662 | 82.076   | 97.952 | 61.923   | 70.079  | 62.167   | 74.226  | 97.223   | 70.651 | 71.889 | 85.099 | 104.118    | 77.99   | 0.705    |      |         |      |         |        |       |          |      |          |         |          |         |          |      |       |     |            |         |          |     |        |      |         |      |         |        |       |          |      |          |         |          |         |          |      |       |     |            |         |          |      |         |      |         |        |       |          |      |          |         |          |         |          |
| Single Compacter    | 111.608 | 79.424  | 78.576   | 83.25  | 91.25   | 36.829 | 83.726  | 75.171 | 65.19  | 80.959   | 98.517 | 61.199   | 70.609  | 60.431   | 73.608  | 97.211   | 71.876 | 71.582 | 83.624 | 103.316    | 77.18   | 0.692    |      |         |      |         |        |       |          |      |          |         |          |         |          |      |       |     |            |         |          |     |        |      |         |      |         |        |       |          |      |          |         |          |         |          |      |       |     |            |         |          |      |         |      |         |        |       |          |      |          |         |          |         |          |
| Multiple Compacters | 113.2   | 79.686  | 79.894   | 83.068 | 92.35   | 38.61  | 84.081  | 75.606 | 64.191 | 81.52    | 99.056 | 61.73    | 69.273  | 59.018   | 71.456  | 96.503   | 69.515 | 69.553 | 83.808 | 102.703    | 76.93   | 0.678    |      |         |      |         |        |       |          |      |          |         |          |         |          |      |       |     |            |         |          |     |        |      |         |      |         |        |       |          |      |          |         |          |         |          |      |       |     |            |         |          |      |         |      |         |        |       |          |      |          |         |          |         |          |

  

| Adaptation method   | Clean | Noise   |          |        |         |        |         |        |        |          |        | Blur     |         |          |         |          |        |        |        |            |         | Digital  |      |         |      |         |        |       |          |      |          | Weather |          |         |          |      |       |     |            |         |          | Ave | RR (%) |      |         |      |         |        |       |          |      |          |         |          |         |          |      |       |     |            |         |          |      |         |      |         |        |       |          |      |          |         |          |         |          |
|---------------------|-------|---------|----------|--------|---------|--------|---------|--------|--------|----------|--------|----------|---------|----------|---------|----------|--------|--------|--------|------------|---------|----------|------|---------|------|---------|--------|-------|----------|------|----------|---------|----------|---------|----------|------|-------|-----|------------|---------|----------|-----|--------|------|---------|------|---------|--------|-------|----------|------|----------|---------|----------|---------|----------|------|-------|-----|------------|---------|----------|------|---------|------|---------|--------|-------|----------|------|----------|---------|----------|---------|----------|
|                     |       | Impulse | Gaussian | Shot   | Speckle | Zoom   | Defocus | Motion | Glass  | Gaussian | JPEG   | Contrast | Elastic | Pixelate | Spatter | Saturate | Snow   | Frost  | Fog    | Brightness | Impulse | Gaussian | Shot | Speckle | Zoom | Defocus | Motion | Glass | Gaussian | JPEG | Contrast | Elastic | Pixelate | Spatter | Saturate | Snow | Frost | Fog | Brightness | Impulse | Gaussian |     |        | Shot | Speckle | Zoom | Defocus | Motion | Glass | Gaussian | JPEG | Contrast | Elastic | Pixelate | Spatter | Saturate | Snow | Frost | Fog | Brightness | Impulse | Gaussian | Shot | Speckle | Zoom | Defocus | Motion | Glass | Gaussian | JPEG | Contrast | Elastic | Pixelate | Spatter | Saturate |
| Full Finetuning     | 56.82 | 50.08   | 49.849   | 50.405 | 51.59   | 44.665 | 51.733  | 50.557 | 47.408 | 50.755   | 53.331 | 47.567   | 47.973  | 47.194   | 49.809  | 51.542   | 47.798 | 48.394 | 50.262 | 53.53      | 49.71   | 0.875    |      |         |      |         |        |       |          |      |          |         |          |         |          |      |       |     |            |         |          |     |        |      |         |      |         |        |       |          |      |          |         |          |         |          |      |       |     |            |         |          |      |         |      |         |        |       |          |      |          |         |          |         |          |
| Multiple Adapters   | 55.66 | 49.412  | 49.507   | 49.905 | 51.511  | 44.188 | 50.04   | 48.903 | 46.478 | 49.316   | 52.131 | 46.375   | 46.852  | 46.748   | 48.489  | 51.073   | 47.122 | 47.925 | 49.141 | 52.353     | 48.81   | 0.877    |      |         |      |         |        |       |          |      |          |         |          |         |          |      |       |     |            |         |          |     |        |      |         |      |         |        |       |          |      |          |         |          |         |          |      |       |     |            |         |          |      |         |      |         |        |       |          |      |          |         |          |         |          |
| Single Adapter      | 55.9  | 44.657  | 43.91    | 44.586 | 46.828  | 39.06  | 45.58   | 44.8   | 41.326 | 44.785   | 47.241 | 41.151   | 42.36   | 41.684   | 43.624  | 45.635   | 42.614 | 42.622 | 44.315 | 47.75      | 43.92   | 0.786    |      |         |      |         |        |       |          |      |          |         |          |         |          |      |       |     |            |         |          |     |        |      |         |      |         |        |       |          |      |          |         |          |         |          |      |       |     |            |         |          |      |         |      |         |        |       |          |      |          |         |          |         |          |
| Hyperformer         | 54.65 | 49.539  | 49.292   | 49.491 | 50.787  | 44.101 | 49.936  | 50.207 | 46.247 | 49.618   | 52.282 | 46.808   | 46.995  | 46.875   | 48.386  | 50.668   | 47.178 | 47.788 | 48.728 | 52.876     | 48.82   | 0.893    |      |         |      |         |        |       |          |      |          |         |          |         |          |      |       |     |            |         |          |     |        |      |         |      |         |        |       |          |      |          |         |          |         |          |      |       |     |            |         |          |      |         |      |         |        |       |          |      |          |         |          |         |          |
| Single Compacter    | 55.33 | 44.3    | 44.355   | 44.721 | 47.321  | 39.593 | 46.589  | 45.556 | 42.63  | 45.492   | 48.06  | 41.684   | 43.155  | 42.24    | 43.791  | 47.106   | 43.338 | 43.56  | 44.689 | 48.847     | 44.58   | 0.806    |      |         |      |         |        |       |          |      |          |         |          |         |          |      |       |     |            |         |          |     |        |      |         |      |         |        |       |          |      |          |         |          |         |          |      |       |     |            |         |          |      |         |      |         |        |       |          |      |          |         |          |         |          |
| Multiple Compacters | 54.68 | 48.704  | 48.545   | 49.141 | 50.31   | 43.163 | 49.682  | 49.547 | 45.913 | 48.593   | 51.36  | 45.834   | 46.311  | 45.429   | 47.496  | 50.167   | 47.066 | 47.368 | 49.277 | 51.288     | 48.17   | 0.881    |      |         |      |         |        |       |          |      |          |         |          |         |          |      |       |     |            |         |          |     |        |      |         |      |         |        |       |          |      |          |         |          |         |          |      |       |     |            |         |          |      |         |      |         |        |       |          |      |          |         |          |         |          |

  

| Adaptation method   | Clean | Noise   |          |        |         |        |         |        |        |          |        | Blur     |         |          |         |          |        |        |        |            |         | Digital  |      |         |      |         |        |       |          |      |          | Weather |          |         |          |      |       |     |            |         |          | Ave | RR (%) |      |         |      |         |        |       |          |      |          |         |          |         |          |      |       |     |            |         |          |      |         |      |         |        |       |          |      |          |         |          |         |          |
|---------------------|-------|---------|----------|--------|---------|--------|---------|--------|--------|----------|--------|----------|---------|----------|---------|----------|--------|--------|--------|------------|---------|----------|------|---------|------|---------|--------|-------|----------|------|----------|---------|----------|---------|----------|------|-------|-----|------------|---------|----------|-----|--------|------|---------|------|---------|--------|-------|----------|------|----------|---------|----------|---------|----------|------|-------|-----|------------|---------|----------|------|---------|------|---------|--------|-------|----------|------|----------|---------|----------|---------|----------|
|                     |       | Impulse | Gaussian | Shot   | Speckle | Zoom   | Defocus | Motion | Glass  | Gaussian | JPEG   | Contrast | Elastic | Pixelate | Spatter | Saturate | Snow   | Frost  | Fog    | Brightness | Impulse | Gaussian | Shot | Speckle | Zoom | Defocus | Motion | Glass | Gaussian | JPEG | Contrast | Elastic | Pixelate | Spatter | Saturate | Snow | Frost | Fog | Brightness | Impulse | Gaussian |     |        | Shot | Speckle | Zoom | Defocus | Motion | Glass | Gaussian | JPEG | Contrast | Elastic | Pixelate | Spatter | Saturate | Snow | Frost | Fog | Brightness | Impulse | Gaussian | Shot | Speckle | Zoom | Defocus | Motion | Glass | Gaussian | JPEG | Contrast | Elastic | Pixelate | Spatter | Saturate |
| Full Finetuning     | 74.06 | 66.829  | 66.844   | 66.815 | 67.963  | 57.586 | 67.805  | 67.059 | 65.968 | 66.198   | 71.107 | 61.303   | 67.073  | 61.432   | 64.389  | 66.14    | 68.911 | 70.36  | 66.456 | 67.131     | 66.18   | 0.894    |      |         |      |         |        |       |          |      |          |         |          |         |          |      |       |     |            |         |          |     |        |      |         |      |         |        |       |          |      |          |         |          |         |          |      |       |     |            |         |          |      |         |      |         |        |       |          |      |          |         |          |         |          |
| Multiple Adapters   | 51.94 | 50.007  | 50.409   | 49.806 | 50.538  | 49.835 | 50.553  | 50.395 | 50.237 | 50.022   | 53.064 | 49.333   | 50.696  | 49.519   | 50.251  | 50.452   | 49.835 | 52.591 | 51.414 | 52.117     | 50.58   | 0.974    |      |         |      |         |        |       |          |      |          |         |          |         |          |      |       |     |            |         |          |     |        |      |         |      |         |        |       |          |      |          |         |          |         |          |      |       |     |            |         |          |      |         |      |         |        |       |          |      |          |         |          |         |          |
| Single Adapter      | 72.78 | 64.935  | 65.05    | 65.021 | 66.485  | 55.06  | 66.284  | 65.222 | 65.667 | 65.624   | 70.001 | 58.031   | 66.7    | 59.064   | 62.911  | 63.959   | 66.801 | 69.212 | 64.576 | 65.896     | 64.55   | 0.887    |      |         |      |         |        |       |          |      |          |         |          |         |          |      |       |     |            |         |          |     |        |      |         |      |         |        |       |          |      |          |         |          |         |          |      |       |     |            |         |          |      |         |      |         |        |       |          |      |          |         |          |         |          |
| Hyperformer         | 70.56 | 65.222  | 65.05    | 64.863 | 65.997  | 55.634 | 65.925  | 65.265 | 63.987 | 65.136   | 69.241 | 59.567   | 65.911  | 58.418   | 63.026  | 63.413   | 66.083 | 67.891 | 64.719 | 65.566     | 64.26   | 0.911    |      |         |      |         |        |       |          |      |          |         |          |         |          |      |       |     |            |         |          |     |        |      |         |      |         |        |       |          |      |          |         |          |         |          |      |       |     |            |         |          |      |         |      |         |        |       |          |      |          |         |          |         |          |
| Single Compacter    | 71.47 | 63.916  | 64.145   | 64.303 | 66.786  | 56.107 | 66.6    | 64.963 | 64.978 | 64.82    | 68.537 | 59.509   | 65.982  | 59.811   | 63.054  | 63.829   | 66.6   | 68.738 | 64.676 | 65.322     | 64.35   | 0.9      |      |         |      |         |        |       |          |      |          |         |          |         |          |      |       |     |            |         |          |     |        |      |         |      |         |        |       |          |      |          |         |          |         |          |      |       |     |            |         |          |      |         |      |         |        |       |          |      |          |         |          |         |          |
| Multiple Compacters | 52.63 | 49.447  | 49.218   | 49.39  | 49.677  | 49.103 | 49.663  | 50.05  | 49.447 | 49.49    | 51.658 | 48.959   | 50.395  | 49.318   | 49.476  | 49.419   | 50.639 | 52.131 | 50.208 | 50.179     | 49.89   | 0.548    |      |         |      |         |        |       |          |      |          |         |          |         |          |      |       |     |            |         |          |     |        |      |         |      |         |        |       |          |      |          |         |          |         |          |      |       |     |            |         |          |      |         |      |         |        |       |          |      |          |         |          |         |          |

  

| Adaptation method   | Clean | Noise   |          |       |         |       |         |        |       |          |       | Blur     |         |          |         |          |       |       |       |            |         | Digital  |      |         |      |         |        |       |          |      |          | Weather |          |         |          |      |       |     |            |         |          | Ave | RR (%) |      |         |      |         |        |       |          |      |          |         |          |         |          |      |       |     |            |         |          |      |         |      |         |        |       |          |      |          |         |          |         |          |
|---------------------|-------|---------|----------|-------|---------|-------|---------|--------|-------|----------|-------|----------|---------|----------|---------|----------|-------|-------|-------|------------|---------|----------|------|---------|------|---------|--------|-------|----------|------|----------|---------|----------|---------|----------|------|-------|-----|------------|---------|----------|-----|--------|------|---------|------|---------|--------|-------|----------|------|----------|---------|----------|---------|----------|------|-------|-----|------------|---------|----------|------|---------|------|---------|--------|-------|----------|------|----------|---------|----------|---------|----------|
|                     |       | Impulse | Gaussian | Shot  | Speckle | Zoom  | Defocus | Motion | Glass | Gaussian | JPEG  | Contrast | Elastic | Pixelate | Spatter | Saturate | Snow  | Frost | Fog   | Brightness | Impulse | Gaussian | Shot | Speckle | Zoom | Defocus | Motion | Glass | Gaussian | JPEG | Contrast | Elastic | Pixelate | Spatter | Saturate | Snow | Frost | Fog | Brightness | Impulse | Gaussian |     |        | Shot | Speckle | Zoom | Defocus | Motion | Glass | Gaussian | JPEG | Contrast | Elastic | Pixelate | Spatter | Saturate | Snow | Frost | Fog | Brightness | Impulse | Gaussian | Shot | Speckle | Zoom | Defocus | Motion | Glass | Gaussian | JPEG | Contrast | Elastic | Pixelate | Spatter | Saturate |
| Full Finetuning     | 66.29 | 55.83   | 56.08    | 57.13 | 59.83   | 49.35 | 58.93   | 57.006 | 53.91 | 57.92    | 62    | 50.96    | 55.85   | 53.08    | 54.57   | 54.33    | 57.32 | 62.33 | 55.74 | 59.76      | 56.42   | 0.851    |      |         |      |         |        |       |          |      |          |         |          |         |          |      |       |     |            |         |          |     |        |      |         |      |         |        |       |          |      |          |         |          |         |          |      |       |     |            |         |          |      |         |      |         |        |       |          |      |          |         |          |         |          |
| Multiple Adapters   | 66.15 | 56.02   | 56.02    | 57.09 | 59.79   | 50.23 | 58.89   | 57.25  | 54.04 | 57.69    | 61.83 | 51.06    | 55.8    | 53.45    | 54.86   | 54.89    | 57.42 | 62.4  | 55.55 | 59.75      | 56.53   | 0.855    |      |         |      |         |        |       |          |      |          |         |          |         |          |      |       |     |            |         |          |     |        |      |         |      |         |        |       |          |      |          |         |          |         |          |      |       |     |            |         |          |      |         |      |         |        |       |          |      |          |         |          |         |          |
| Single Adapter      | 66.41 | 56.48   | 56.4     | 57.21 | 59.94   | 49.58 | 59.16   | 57.21  | 54.04 | 57.96    | 61.49 | 50.97    | 55.63   | 52.94    | 54.49   | 54.5     | 57.55 | 62.74 | 55.98 | 60.24      | 56.57   | 0.852    |      |         |      |         |        |       |          |      |          |         |          |         |          |      |       |     |            |         |          |     |        |      |         |      |         |        |       |          |      |          |         |          |         |          |      |       |     |            |         |          |      |         |      |         |        |       |          |      |          |         |          |         |          |
| Hyperformer         | 65.18 | 55.6    | 55.48    | 56.43 | 59.19   | 49.67 | 58.37   | 56.9   | 53.95 | 57.18    | 61.2  | 50.72    | 55.47   | 52.9     | 54.16   | 54.22    | 57.1  | 61.93 | 55.58 | 59.21      | 56.07   | 0.86     |      |         |      |         |        |       |          |      |          |         |          |         |          |      |       |     |            |         |          |     |        |      |         |      |         |        |       |          |      |          |         |          |         |          |      |       |     |            |         |          |      |         |      |         |        |       |          |      |          |         |          |         |          |
| Single Compacter    | 65.98 | 55.93   | 55.97    | 57.1  | 59.57   | 49.43 | 59.11   | 56.82  | 53.99 | 57.76    | 61.81 | 50.86    | 55.73   | 52.89    | 54.95   | 55.07    | 57.3  | 62.53 | 55.91 | 59.83      | 56.45   | 0.856    |      |         |      |         |        |       |          |      |          |         |          |         |          |      |       |     |            |         |          |     |        |      |         |      |         |        |       |          |      |          |         |          |         |          |      |       |     |            |         |          |      |         |      |         |        |       |          |      |          |         |          |         |          |
| Multiple Compacters | 65.5  | 55.86   | 55.9     | 56.64 | 59.3    | 50.14 | 58.85   | 57.1   | 54.24 | 57.44    | 61.67 | 50.88    | 55.81   | 53.11    | 53.96   | 54.04    | 56.8  | 62.01 | 55.55 | 59.44      | 56.25   | 0.859    |      |         |      |         |        |       |          |      |          |         |          |         |          |      |       |     |            |         |          |     |        |      |         |      |         |        |       |          |      |          |         |          |         |          |      |       |     |            |         |          |      |         |      |         |        |       |          |      |          |         |          |         |          |

Table 6: Relative robustness of adaptation methods based on CLIP-T5 against text corruptions grouped by corruption levels.

| Adaptation method   | Clean | Char-level | Char-level RR | Word-level | Word-level RR | Sentence-level | Sentence-level RR | RR    |
|---------------------|-------|------------|---------------|------------|---------------|----------------|-------------------|-------|
| Full finetuning     | 56.82 | 21.13      | 0.372         | 38.23      | 0.673         | 53.54          | 0.942             | 0.643 |
| Multiple adapters   | 55.66 | 20.43      | 0.367         | 35.82      | 0.644         | 52.07          | 0.936             | 0.623 |
| Single adapter      | 55.9  | 23.99      | 0.429         | 36.69      | 0.656         | 47.77          | 0.855             | 0.633 |
| Hyperformer         | 54.65 | 22.69      | 0.415         | 38.19      | 0.699         | 51.89          | 0.949             | 0.67  |
| Single compacter    | 55.33 | 23.5       | 0.425         | 36.88      | 0.667         | 48.64          | 0.879             | 0.642 |
| Multiple compacters | 54.68 | 24.28      | 0.444         | 38.14      | 0.698         | 51.99          | 0.951             | 0.677 |
| Adaptation method   | Clean | Char-level | Char-level RR | Word-level | Word-level RR | Sentence-level | Sentence-level RR | RR    |
| Full finetuning     | 74.06 | 56.18      | 0.759         | 66.37      | 0.896         | 73.2           | 0.988             | 0.877 |
| Multiple adapters   | 51.94 | 51.09      | 0.984         | 51.78      | 0.997         | 51.92          | 1                 | 0.994 |
| Single adapter      | 72.78 | 54.78      | 0.753         | 65.69      | 0.903         | 71.53          | 0.983             | 0.878 |
| Hyperformer         | 70.56 | 54.83      | 0.777         | 64.46      | 0.914         | 69.75          | 0.989             | 0.891 |
| Single compacter    | 71.47 | 55.78      | 0.78          | 64.64      | 0.904         | 70.63          | 0.988             | 0.887 |
| Multiple compacters | 52.63 | 52.67      | 1.001         | 52.58      | 0.999         | 52.69          | 1.001             | 1     |
| Adaptation method   | Clean | Char-level | Char-level RR | Word-level | Word-level RR | Sentence-level | Sentence-level RR | RR    |
| Full finetuning     | 66.29 | 30.26      | 0.456         | 51.05      | 0.77          | 64.55          | 0.974             | 0.725 |
| Multiple adapters   | 66.15 | 34.14      | 0.516         | 53.89      | 0.815         | 64.73          | 0.979             | 0.767 |
| Single adapter      | 66.41 | 34.38      | 0.518         | 53.16      | 0.8           | 64.86          | 0.977             | 0.759 |
| Hyperformer         | 65.18 | 33.79      | 0.518         | 52.91      | 0.812         | 63.59          | 0.976             | 0.765 |
| Single compacter    | 65.98 | 34.1       | 0.517         | 53.18      | 0.806         | 64.4           | 0.976             | 0.762 |
| Multiple compacters | 65.5  | 34.39      | 0.525         | 52.77      | 0.806         | 64.07          | 0.978             | 0.764 |

Table 7: Performance and decrease ratio of Full Finetuning on CLIP-BART against image corruptions given severity 1 to 5.

| corruption        | severity | VQA   |          |                | GQA    |          |                | NLVR   |          |                | Caption |          |                |
|-------------------|----------|-------|----------|----------------|--------|----------|----------------|--------|----------|----------------|---------|----------|----------------|
|                   |          | Acc   | Decrease | Decrease Ratio | Acc    | Decrease | Decrease Ratio | Acc    | Decrease | Decrease Ratio | CIDer   | Decrease | Decrease Ratio |
| impulse_noise     | 1        | 64.98 | -1.77    | -2.652%        | 53.26  | -1.78    | -3.235%        | 72.284 | -0.726   | -0.995%        | 108.278 | -6.752   | -5.870%        |
| gaussian_noise    | 1        | 65.73 | -1.02    | -1.528%        | 53.983 | -1.057   | -1.920%        | 72.872 | -0.138   | -0.189%        | 112.591 | -2.439   | -2.120%        |
| shot_noise        | 1        | 65.58 | -1.17    | -1.753%        | 54.007 | -1.033   | -1.877%        | 72.642 | -0.368   | -0.503%        | 111.866 | -3.164   | -2.751%        |
| speckle_noise     | 1        | 65.57 | -1.18    | -1.768%        | 53.951 | -1.089   | -1.978%        | 72.815 | -0.195   | -0.268%        | 113.085 | -1.945   | -1.691%        |
| zoom_blur         | 1        | 59.31 | -7.44    | -11.146%       | 50.986 | -4.054   | -7.366%        | 57.557 | -15.453  | -21.166%       | 85.318  | -29.712  | -25.830%       |
| defocus_blur      | 1        | 65.68 | -1.07    | -1.603%        | 54.15  | -0.89    | -1.617%        | 73.446 | 0.436    | 0.598%         | 112.459 | -2.571   | -2.235%        |
| motion_blur       | 1        | 65.56 | -1.19    | -1.783%        | 54.754 | -0.286   | -0.519%        | 73.662 | 0.652    | 0.892%         | 111.378 | -3.652   | -3.174%        |
| glass_blur        | 1        | 65.72 | -1.03    | -1.543%        | 54.365 | -0.675   | -1.227%        | 72.901 | -0.109   | -0.150%        | 112.786 | -2.244   | -1.951%        |
| gaussian_blur     | 1        | 66.33 | -0.42    | -0.629%        | 54.476 | -0.564   | -1.025%        | 73.618 | 0.608    | 0.833%         | 113.871 | -1.159   | -1.008%        |
| jpeg_compression  | 1        | 66.08 | -0.67    | -1.004%        | 54.73  | -0.31    | -0.562%        | 73.245 | 0.235    | 0.322%         | 114.068 | -0.962   | -0.836%        |
| contrast          | 1        | 65.12 | -1.63    | -2.442%        | 54.397 | -0.643   | -1.169%        | 72.915 | -0.095   | -0.130%        | 112.188 | -2.842   | -2.471%        |
| elastic_transform | 1        | 66.34 | -0.41    | -0.614%        | 54.548 | -0.492   | -0.895%        | 72.456 | -0.554   | -0.759%        | 112.114 | -2.916   | -2.535%        |
| pixelate          | 1        | 63.54 | -3.21    | -4.809%        | 53.363 | -1.677   | -3.047%        | 72.011 | -0.999   | -1.368%        | 104.059 | -10.771  | -9.538%        |
| snow              | 1        | 62.2  | -4.55    | -6.816%        | 51.67  | -3.37    | -6.124%        | 71.193 | -1.817   | -2.489%        | 100.746 | -14.284  | -12.418%       |
| frost             | 1        | 63.32 | -3.43    | -5.139%        | 51.662 | -3.378   | -6.138%        | 71.451 | -1.559   | -2.135%        | 102.595 | -12.435  | -10.810%       |
| fog               | 1        | 64.67 | -2.08    | -3.116%        | 54.277 | -0.763   | -1.386%        | 72.456 | -0.554   | -0.759%        | 111.289 | -3.741   | -3.252%        |
| brightness        | 1        | 66.41 | -0.34    | -0.509%        | 54.874 | -0.166   | -0.302%        | 73.504 | 0.494    | 0.676%         | 114.175 | -0.855   | -0.743%        |
| spatter           | 1        | 66.32 | -0.43    | -0.644%        | 55.048 | 0.008    | 0.015%         | 72.987 | 0.023    | 0.032%         | 113.983 | -1.047   | -0.910%        |
| saturate          | 1        | 64.01 | -2.74    | -4.105%        | 53.92  | -1.12    | -2.036%        | 71.408 | -1.602   | -2.194%        | 110.866 | -4.164   | -3.620%        |

  

| corruption        | severity | VQA   |          |                | GQA    |          |                | NLVR   |          |                | Caption |          |                |
|-------------------|----------|-------|----------|----------------|--------|----------|----------------|--------|----------|----------------|---------|----------|----------------|
|                   |          | Acc   | Decrease | Decrease Ratio | Acc    | Decrease | Decrease Ratio | Acc    | Decrease | Decrease Ratio | CIDer   | Decrease | Decrease Ratio |
| impulse_noise     | 2        | 63.89 | -2.86    | -4.285%        | 53.125 | -1.915   | -3.480%        | 71.48  | -1.53    | -2.096%        | 105.865 | -9.165   | -7.968%        |
| gaussian_noise    | 2        | 64.9  | -1.85    | -2.772%        | 53.244 | -1.796   | -3.264%        | 72.298 | -0.712   | -0.975%        | 109.252 | -5.778   | -5.023%        |
| shot_noise        | 2        | 64.71 | -2.04    | -3.056%        | 53.554 | -1.486   | -2.700%        | 72.04  | -0.97    | -1.329%        | 109.188 | -5.842   | -5.078%        |
| speckle_noise     | 2        | 65.1  | -1.65    | -2.472%        | 53.792 | -1.248   | -2.267%        | 72.169 | -0.841   | -1.152%        | 111.207 | -3.823   | -3.323%        |
| zoom_blur         | 2        | 56.37 | -10.38   | -15.551%       | 48.307 | -6.733   | -12.234%       | 62.868 | -10.142  | -13.892%       | 68.607  | -46.423  | -40.357%       |
| defocus_blur      | 2        | 64.98 | -1.77    | -2.652%        | 53.92  | -1.12    | -2.036%        | 73.073 | 0.063    | 0.086%         | 110.072 | -4.958   | -4.310%        |
| motion_blur       | 2        | 64.46 | -2.29    | -3.431%        | 54.11  | -0.93    | -1.689%        | 72.7   | -0.31    | -0.425%        | 108.436 | -6.594   | -5.733%        |
| glass_blur        | 2        | 64.51 | -2.24    | -3.356%        | 53.403 | -1.637   | -2.975%        | 72.513 | -0.497   | -0.680%        | 107.491 | -7.539   | -6.554%        |
| gaussian_blur     | 2        | 65.27 | -1.48    | -2.217%        | 54.087 | -0.953   | -1.732%        | 73.489 | 0.479    | 0.656%         | 111.55  | -3.48    | -3.025%        |
| jpeg_compression  | 2        | 65.91 | -0.84    | -1.258%        | 54.11  | -0.93    | -1.689%        | 72.757 | -0.253   | -0.346%        | 112.967 | -2.063   | -1.794%        |
| contrast          | 2        | 64.49 | -2.26    | -3.386%        | 54.158 | -0.882   | -1.602%        | 72.642 | -0.368   | -0.503%        | 109.976 | -5.054   | -4.393%        |
| elastic_transform | 2        | 62.83 | -3.92    | -5.873%        | 52.186 | -2.854   | -5.185%        | 68.954 | -4.056   | -5.556%        | 97.789  | -17.241  | -14.988%       |
| pixelate          | 2        | 62.52 | -4.23    | -6.337%        | 53.069 | -1.971   | -3.581%        | 68.882 | -4.128   | -5.654%        | 99.817  | -15.213  | -13.225%       |
| snow              | 2        | 58.97 | -7.78    | -11.655%       | 49.11  | -5.93    | -10.775%       | 68.207 | -4.803   | -6.578%        | 88.639  | -26.391  | -22.943%       |
| frost             | 2        | 59.75 | -7.0     | -10.487%       | 49.936 | -5.104   | -9.273%        | 69.269 | -3.741   | -5.123%        | 90.028  | -25.002  | -21.736%       |
| fog               | 2        | 63.99 | -2.76    | -4.135%        | 53.983 | -1.057   | -1.920%        | 73.17  | -5.693   | -7.797%        | 109.67  | -5.36    | -4.660%        |
| brightness        | 2        | 65.82 | -0.93    | -1.393%        | 54.333 | -0.707   | -1.285%        | 73.389 | 0.379    | 0.519%         | 112.915 | -2.115   | -1.838%        |
| spatter           | 2        | 62.97 | -3.78    | -5.663%        | 52.838 | -2.202   | -4.009%        | 72.011 | -0.999   | -1.368%        | 103.555 | -11.475  | -9.976%        |
| saturate          | 2        | 60.93 | -5.82    | -8.719%        | 52.473 | -2.567   | -4.665%        | 69.097 | -3.913   | -5.359%        | 105.074 | -9.956   | -8.655%        |

  

| corruption        | severity | VQA   |          |                | GQA    |          |                | NLVR   |          |                | Caption |          |                |
|-------------------|----------|-------|----------|----------------|--------|----------|----------------|--------|----------|----------------|---------|----------|----------------|
|                   |          | Acc   | Decrease | Decrease Ratio | Acc    | Decrease | Decrease Ratio | Acc    | Decrease | Decrease Ratio | CIDer   | Decrease | Decrease Ratio |
| impulse_noise     | 3        | 63.14 | -3.61    | -5.408%        | 52.846 | -2.194   | -3.986%        | 70.59  | -2.42    | -3.315%        | 104.057 | -10.973  | -9.539%        |
| gaussian_noise    | 3        | 63.11 | -3.64    | -5.453%        | 52.902 | -2.138   | -3.885%        | 70.934 | -2.076   | -2.843%        | 104.522 | -10.508  | -9.135%        |
| shot_noise        | 3        | 63.07 | -3.68    | -5.513%        | 53.228 | -1.812   | -3.292%        | 71.695 | -1.315   | -1.801%        | 104.457 | -10.573  | -9.192%        |
| speckle_noise     | 3        | 63.49 | -3.26    | -4.884%        | 52.759 | -2.281   | -4.145%        | 70.547 | -2.463   | -3.374%        | 105.693 | -9.337   | -8.117%        |
| zoom_blur         | 3        | 53.39 | -13.36   | -20.015%       | 46.709 | -8.331   | -15.137%       | 59.882 | -13.128  | -17.981%       | 54.376  | -60.654  | -52.729%       |
| defocus_blur      | 3        | 62.97 | -3.78    | -5.663%        | 52.743 | -2.297   | -4.174%        | 71.796 | -1.214   | -1.663%        | 102.735 | -12.295  | -10.688%       |
| motion_blur       | 3        | 62.38 | -4.37    | -6.547%        | 53.554 | -1.486   | -2.700%        | 70.992 | -2.018   | -2.764%        | 101.178 | -13.852  | -12.042%       |
| glass_blur        | 3        | 59.33 | -7.42    | -11.116%       | 49.618 | -5.422   | -9.850%        | 69.341 | -3.669   | -5.025%        | 87.475  | -27.555  | -23.955%       |
| gaussian_blur     | 3        | 64.02 | -2.73    | -4.090%        | 52.997 | -2.043   | -3.711%        | 72.212 | -0.798   | -1.093%        | 105.758 | -9.272   | -8.060%        |
| jpeg_compression  | 3        | 65.65 | -1.1     | -1.648%        | 54.42  | -0.62    | -1.126%        | 72.212 | -0.798   | -1.093%        | 111.718 | -3.312   | -2.880%        |
| contrast          | 3        | 63.11 | -3.64    | -5.453%        | 53.594 | -1.446   | -2.628%        | 70.963 | -2.047   | -2.804%        | 105.053 | -9.977   | -8.673%        |
| elastic_transform | 3        | 64.47 | -2.28    | -3.416%        | 53.331 | -1.709   | -3.105%        | 72.973 | -0.037   | -0.051%        | 107.551 | -7.479   | -6.502%        |
| pixelate          | 3        | 60.0  | -6.75    | -10.112%       | 51.479 | -3.561   | -6.470%        | 67.145 | -5.865   | -8.033%        | 90.077  | -24.953  | -21.693%       |
| snow              | 3        | 56.86 | -9.89    | -14.816%       | 48.028 | -7.012   | -12.739%       | 66.112 | -6.898   | -9.448%        | 80.885  | -34.145  | -29.684%       |
| frost             | 3        | 57.12 | -9.63    | -14.427%       | 48.863 | -6.177   | -11.223%       | 67.303 | -5.707   | -7.817%        | 81.406  | -33.624  | -29.231%       |
| fog               | 3        | 62.98 | -3.77    | -5.648%        | 53.697 | -1.343   | -2.440%        | 71.279 | -1.731   | -2.371%        | 105.58  | -9.45    | -8.216%        |
| brightness        | 3        | 65.2  | -1.55    | -2.322%        | 54.102 | -0.938   | -1.703%        | 72.312 | -0.698   | -0.956%        | 112.42  | -2.61    | -2.269%        |
| spatter           | 3        | 61.54 | -5.21    | -7.805%        | 51.304 | -3.736   | -6.788%        | 71.265 | -1.745   | -2.391%        | 96.361  | -18.669  | -16.230%       |
| saturate          | 3        | 65.68 | -1.07    | -1.603%        | 54.174 | -0.866   | -1.573%        | 73.518 | 0.508    | 0.696%         | 113.541 | -1.489   | -1.294%        |

  

| corruption        | severity | VQA   |          |                | GQA    |          |                | NLVR   |          |                | Caption |          |                |
|-------------------|----------|-------|----------|----------------|--------|----------|----------------|--------|----------|----------------|---------|----------|----------------|
|                   |          | Acc   | Decrease | Decrease Ratio | Acc    | Decrease | Decrease Ratio | Acc    | Decrease | Decrease Ratio | CIDer   | Decrease | Decrease Ratio |
| impulse_noise     | 4        | 60.24 | -6.51    | -9.753%        | 51.598 | -3.442   | -6.254%        | 68.882 | -4.128   | -5.654%        | 94.23   | -20.8    | -18.082%       |
| gaussian_noise    | 4        | 60.56 | -6.19    | -9.273%        | 51.67  | -3.37    | -6.124%        | 69.025 | -3.985   | -5.458%        | 96.345  | -18.685  | -16.243%       |
| shot_noise        | 4        | 60.0  | -6.75    | -10.112%       | 51.264 | -3.776   | -6.660%        | 67.633 | -5.377   | -7.365%        | 90.247  | -20.783  | -18.068%       |
| speckle_noise     | 4        | 61.73 | -5.02    | -7.521%        | 52.234 | -2.806   | -5.098%        | 69.772 | -3.238   | -4.435%        | 104.477 | -14.553  | -12.651%       |
| zoom_blur         | 4        | 51.52 | -15.23   | -22.816%       | 45.262 | -9.778   | -17.766%       | 58.203 | -14.807  | -20.281%       | 45.355  | -69.675  | -60.571%       |
| defocus_blur      | 4        | 61.36 | -5.39    | -8.075%        | 52.003 | -3.037   | -5.517%        | 70.044 | -2.966   | -4.062%        | 95.82   | -19.21   | -16.700%       |
| motion_blur       | 4        | 59.67 | -7.08    | -10.607%       | 51.153 | -3.887   | -7.062%        | 68.078 | -4.932   | -6.755%        | 87.182  | -27.848  | -24.209%       |
| glass_blur        | 4        | 57.32 | -9.43    | -14.127%       | 48.569 | -6.471   | -11.757%       | 68.021 | -4.989   | -6.834%        | 78.438  | -36.592  | -31.811%       |
| gaussian_blur     | 4        | 61.79 | -4.96    | -7.431%        | 52.25  | -2.79    | -5.069%        | 70.26  | -2.75    | -3.767%        | 98.415  | -16.615  | -14.444%       |
| jpeg_compression  | 4        | 64.36 | -2.39    | -3.581%        | 53.943 | -1.097   | -1.992%        | 72.226 | -0.784   | -1.074%        | 107.108 | -7.922   | -6.887%        |
| contrast          | 4        | 58.97 | -7.78    | -11.655%       | 50.723 | -4.317   | -7.843%        | 67.059 | -5.951   | -8.151%        | 92.46   | -22.57   | -19.621%       |
| elastic_transform | 4        | 62.44 | -4.31    | -6.457%        | 51.773 | -3.267   | -5.936%        | 71.81  | -1.2     | -1.644%        | 98.842  | -16.188  | -14.073%       |
| pixelate          | 4        | 55.69 | -11.06   | -16.569%       | 48.561 | -6.479   | -11.771%       | 62.495 | -10.515  | -14.403%       | 74.937  | -40.093  | -34.855%       |
| snow              | 4        | 53.7  | -13.05   | -19.551%       | 46.216 | -8.824   | -16.033%       | 63.672 | -9.338   | -12.791%       | 64.972  | -50.058  | -43.517%       |
| frost             | 4        | 56.41 | -10.34   | -15.491%       | 48.76  | -6.28    | -11.410%       | 66.973 | -6.037   | -8.269%        | 77.764  | -37.266  | -32.397%       |
| fog               | 4        | 61.3  | -5.45    | -8.165%        | 52.202 | -2.838   | -5.156%        | 69.729 | -3.281   | -4.494%        | 99.957  | -15.073  | -13.103%       |
| brightness        | 4        | 64.45 | -2.3     | -3.446%        | 53.609 | -1.431   | -2.599%        | 71.078 | -1.932   | -2.646%        | 109.263 | -5.767   | -5.014%        |
| spatter           | 4        | 59.01 | -7.74    | -11.596%       | 50.246 | -4.794   | -8.709%        | 68.265 | -4.745   | -6.500%        | 85.761  | -29.269  | -25.445%       |
| saturate          | 4        | 62.99 | -3.76    | -5.633%        | 52.608 | -2.432   | -4.419%        | 70.662 | -2.348   | -3.216%        | 107.0   | -8.03    | -6.981%        |

  

| corruption     | severity | VQA   |          |                | GQA   |          |                | NLVR  |          |                | Caption |          |                |
|----------------|----------|-------|----------|----------------|-------|----------|----------------|-------|----------|----------------|---------|----------|----------------|
|                |          | Acc   | Decrease | Decrease Ratio | Acc   | Decrease | Decrease Ratio | Acc   | Decrease | Decrease Ratio | CIDer   | Decrease | Decrease Ratio |
| impulse_noise  | 5        | 56.35 | -10.4    | -15.58%        | 49.15 | -5.89    | -10.70%        | 66.16 | -6.85    | -9.38%         | 81.17   | -33.86   | -29.444%       |
| gaussian_noise | 5        | 56.25 | -10.5    | -15.73%        | 49.03 | -6.01    | -10.92%        | 65.81 | -7.2     | -9.86%         | 81.35   | -33.68   | -29.288%       |
| shot_noise     | 5        | 57.2  | -9.55    | -14.31%        | 49.82 | -5.22    | -9.48%         | 65.73 | -7.28    | -9.97%         | 85.44   | -29.59   | -25.72%        |
| speckle_noise  | 5        | 59.85 | -6.9     | -10.34%        | 51.44 | -3.6     | -6.54%         | 67.53 | -5.48    | -7.51%         | 94.18   | -20.85   | -18            |

Table 8: Performance and decrease ratio of Half-shared Adapters on CLIP-BART against image corruptions given severity 1 to 5.

| corruption        | severity | VQA   |          |                | GQA    |          |                | NLVR   |          |                | Caption |          |                |
|-------------------|----------|-------|----------|----------------|--------|----------|----------------|--------|----------|----------------|---------|----------|----------------|
|                   |          | Acc   | Decrease | Decrease Ratio | Acc    | Decrease | Decrease Ratio | Acc    | Decrease | Decrease Ratio | CIDer   | Decrease | Decrease Ratio |
| impulse_noise     | 1        | 62.84 | -2.36    | -3.620%        | 51.654 | -1.306   | -2.467%        | 69.241 | -0.789   | -1.127%        | 109.345 | -5.155   | -4.502%        |
| gaussian_noise    | 1        | 63.97 | -1.23    | -1.887%        | 52.6   | -0.36    | -0.680%        | 70.217 | 0.187    | 0.267%         | 112.308 | -2.192   | -1.915%        |
| shot_noise        | 1        | 64.04 | -1.16    | -1.779%        | 51.701 | -1.259   | -2.377%        | 70.26  | 0.23     | 0.328%         | 111.183 | -3.317   | -2.897%        |
| speckle_noise     | 1        | 64.15 | -1.05    | -1.610%        | 52.139 | -0.821   | -1.551%        | 69.255 | -0.775   | -1.107%        | 111.187 | -3.313   | -2.893%        |
| zoom_blur         | 1        | 58.33 | -6.87    | -10.537%       | 49.507 | -3.453   | -6.520%        | 57.227 | -12.803  | -18.282%       | 85.69   | -28.81   | -25.162%       |
| defocus_blur      | 1        | 64.04 | -1.16    | -1.779%        | 52.155 | -0.805   | -1.521%        | 70.174 | 0.144    | 0.205%         | 110.785 | -3.715   | -3.245%        |
| motion_blur       | 1        | 64.08 | -1.12    | -1.718%        | 52.457 | -0.503   | -0.950%        | 70.116 | 0.086    | 0.123%         | 110.093 | -4.407   | -3.849%        |
| glass_blur        | 1        | 64.14 | -1.06    | -1.626%        | 52.385 | -0.575   | -1.086%        | 70.389 | 0.359    | 0.513%         | 111.431 | -3.069   | -2.680%        |
| gaussian_blur     | 1        | 64.9  | -0.3     | -0.460%        | 52.95  | -0.01    | -0.020%        | 70.274 | 0.244    | 0.349%         | 113.665 | -0.835   | -0.729%        |
| jpeg_compression  | 1        | 64.63 | -0.57    | -0.874%        | 52.457 | -0.503   | -0.950%        | 70.36  | 0.33     | 0.472%         | 113.127 | -1.373   | -1.200%        |
| contrast          | 1        | 63.76 | -1.44    | -2.209%        | 52.027 | -0.933   | -1.761%        | 69.901 | -0.129   | -0.184%        | 111.495 | -3.005   | -2.624%        |
| elastic_transform | 1        | 64.43 | -0.77    | -1.181%        | 52.274 | -0.686   | -1.296%        | 69.8   | -0.23    | -0.328%        | 112.4   | -2.1     | -1.834%        |
| pixelate          | 1        | 61.78 | -3.42    | -5.245%        | 51.137 | -1.823   | -3.442%        | 69.112 | -0.918   | -1.312%        | 102.092 | -12.408  | -10.836%       |
| snow              | 1        | 60.28 | -4.92    | -7.546%        | 50.477 | -2.483   | -4.688%        | 68.265 | -1.765   | -2.521%        | 99.536  | -14.964  | -13.069%       |
| frost             | 1        | 61.47 | -3.73    | -5.721%        | 50.469 | -2.491   | -4.703%        | 68.451 | -1.579   | -2.254%        | 103.326 | -11.174  | -9.759%        |
| fog               | 1        | 63.31 | -1.89    | -2.899%        | 51.964 | -0.996   | -1.881%        | 70.274 | 0.244    | 0.349%         | 111.251 | -3.249   | -2.837%        |
| brightness        | 1        | 64.79 | -0.41    | -0.629%        | 52.663 | -0.297   | -0.560%        | 70.748 | 0.718    | 1.025%         | 113.052 | -1.448   | -1.265%        |
| spatter           | 1        | 64.51 | -0.69    | -1.058%        | 52.552 | -0.408   | -0.770%        | 70.317 | 0.287    | 0.410%         | 112.966 | -1.534   | -1.340%        |
| saturate          | 1        | 62.37 | -2.83    | -4.340%        | 51.638 | -1.322   | -2.497%        | 69.269 | -0.761   | -1.086%        | 110.372 | -4.128   | -3.606%        |

  

| corruption        | severity | VQA   |          |                | GQA    |          |                | NLVR   |          |                | Caption |          |                |
|-------------------|----------|-------|----------|----------------|--------|----------|----------------|--------|----------|----------------|---------|----------|----------------|
|                   |          | Acc   | Decrease | Decrease Ratio | Acc    | Decrease | Decrease Ratio | Acc    | Decrease | Decrease Ratio | CIDer   | Decrease | Decrease Ratio |
| impulse_noise     | 2        | 62.14 | -3.06    | -4.693%        | 50.954 | -2.006   | -3.788%        | 67.978 | -2.052   | -2.931%        | 105.6   | -8.9     | -7.773%        |
| gaussian_noise    | 2        | 63.21 | -1.99    | -3.052%        | 51.487 | -1.473   | -2.782%        | 69.413 | -0.617   | -0.881%        | 109.248 | -5.252   | -4.586%        |
| shot_noise        | 2        | 63.13 | -2.07    | -3.175%        | 51.773 | -1.187   | -2.241%        | 68.939 | -1.091   | -1.557%        | 107.995 | -6.505   | -5.681%        |
| speckle_noise     | 2        | 63.53 | -1.67    | -2.561%        | 51.693 | -1.267   | -2.392%        | 69.399 | -0.631   | -0.902%        | 110.78  | -3.72    | -3.249%        |
| zoom_blur         | 2        | 55.67 | -9.53    | -14.617%       | 47.694 | -5.266   | -9.943%        | 61.806 | -8.224   | -11.744%       | 69.462  | -45.038  | -39.334%       |
| defocus_blur      | 2        | 63.37 | -1.83    | -2.807%        | 51.383 | -1.577   | -2.977%        | 70.001 | -0.029   | -0.041%        | 109.082 | -5.418   | -4.732%        |
| motion_blur       | 2        | 62.96 | -2.24    | -3.436%        | 51.582 | -1.378   | -2.602%        | 69.872 | -0.158   | -0.225%        | 106.891 | -7.609   | -6.646%        |
| glass_blur        | 2        | 63.17 | -2.03    | -3.113%        | 51.717 | -1.243   | -2.347%        | 69.126 | -0.904   | -1.291%        | 107.2   | -7.3     | -6.376%        |
| gaussian_blur     | 2        | 63.88 | -1.32    | -2.025%        | 51.852 | -1.108   | -2.091%        | 70.231 | 0.201    | 0.287%         | 110.2   | -4.3     | -3.756%        |
| jpeg_compression  | 2        | 64.26 | -0.94    | -1.442%        | 52.083 | -0.877   | -1.656%        | 69.585 | -0.445   | -0.635%        | 112.297 | -2.203   | -1.924%        |
| contrast          | 2        | 63.14 | -2.06    | -3.160%        | 51.844 | -1.116   | -2.106%        | 69.327 | -0.703   | -1.004%        | 109.098 | -5.402   | -4.718%        |
| elastic_transform | 2        | 61.55 | -3.65    | -5.598%        | 50.517 | -2.443   | -4.613%        | 67.547 | -2.483   | -3.546%        | 97.081  | -17.419  | -15.213%       |
| pixelate          | 2        | 61.27 | -3.93    | -6.028%        | 50.731 | -2.229   | -4.208%        | 66.284 | -3.746   | -5.349%        | 99.594  | -14.906  | -13.018%       |
| snow              | 2        | 57.4  | -7.8     | -11.963%       | 47.162 | -5.798   | -10.948%       | 66.815 | -3.215   | -4.591%        | 88.051  | -26.449  | -23.099%       |
| frost             | 2        | 58.16 | -7.04    | -10.798%       | 48.497 | -4.463   | -8.426%        | 67.002 | -3.028   | -4.324%        | 91.679  | -22.821  | -19.931%       |
| fog               | 2        | 62.61 | -2.59    | -3.972%        | 51.415 | -1.545   | -2.917%        | 65.638 | -4.392   | -6.272%        | 109.042 | -5.458   | -4.767%        |
| brightness        | 2        | 64.2  | -1.0     | -1.534%        | 52.003 | -0.957   | -1.806%        | 70.274 | 0.244    | 0.349%         | 112.985 | -1.515   | -1.323%        |
| spatter           | 2        | 61.23 | -3.97    | -6.089%        | 50.859 | -2.101   | -3.968%        | 69.212 | -0.818   | -1.168%        | 102.925 | -11.575  | -10.109%       |
| saturate          | 2        | 59.61 | -5.59    | -8.574%        | 50.708 | -2.252   | -4.253%        | 67.088 | -2.942   | -4.201%        | 104.939 | -9.561   | -8.350%        |

  

| corruption        | severity | VQA   |          |                | GQA    |          |                | NLVR   |          |                | Caption |          |                |
|-------------------|----------|-------|----------|----------------|--------|----------|----------------|--------|----------|----------------|---------|----------|----------------|
|                   |          | Acc   | Decrease | Decrease Ratio | Acc    | Decrease | Decrease Ratio | Acc    | Decrease | Decrease Ratio | CIDer   | Decrease | Decrease Ratio |
| impulse_noise     | 3        | 61.32 | -3.88    | -5.951%        | 50.175 | -2.785   | -5.259%        | 68.222 | -1.808   | -2.582%        | 103.077 | -11.423  | -9.977%        |
| gaussian_noise    | 3        | 61.62 | -3.58    | -5.491%        | 50.549 | -2.411   | -4.553%        | 68.58  | -1.45    | -2.070%        | 105.052 | -9.448   | -8.251%        |
| shot_noise        | 3        | 61.49 | -3.71    | -5.690%        | 51.264 | -1.696   | -3.202%        | 68.164 | -1.866   | -2.664%        | 103.781 | -10.719  | -9.362%        |
| speckle_noise     | 3        | 61.96 | -3.24    | -4.969%        | 50.867 | -2.093   | -3.953%        | 68.509 | -1.521   | -2.172%        | 104.433 | -10.067  | -8.792%        |
| zoom_blur         | 3        | 52.68 | -12.52   | -19.202%       | 45.675 | -7.285   | -13.756%       | 59.165 | -10.865  | -15.515%       | 54.675  | -59.825  | -52.249%       |
| defocus_blur      | 3        | 61.64 | -3.56    | -5.460%        | 50.875 | -2.085   | -3.938%        | 68.738 | -1.292   | -1.844%        | 102.239 | -12.261  | -10.708%       |
| motion_blur       | 3        | 61.2  | -4.0     | -6.135%        | 51.153 | -1.807   | -3.412%        | 67.978 | -2.052   | -2.931%        | 100.62  | -13.88   | -12.123%       |
| glass_blur        | 3        | 57.94 | -7.26    | -11.135%       | 47.742 | -5.218   | -9.853%        | 67.159 | -2.871   | -4.099%        | 87.071  | -27.429  | -23.956%       |
| gaussian_blur     | 3        | 62.33 | -2.87    | -4.402%        | 51.423 | -1.537   | -2.902%        | 68.652 | -1.378   | -1.967%        | 104.626 | -9.874   | -8.624%        |
| jpeg_compression  | 3        | 63.99 | -1.21    | -1.856%        | 52.536 | -0.424   | -0.800%        | 69.643 | -0.387   | -0.553%        | 111.723 | -2.777   | -2.425%        |
| contrast          | 3        | 61.77 | -3.43    | -5.261%        | 50.755 | -2.205   | -4.163%        | 68.336 | -1.694   | -2.418%        | 105.203 | -9.297   | -8.120%        |
| elastic_transform | 3        | 63.0  | -2.2     | -3.374%        | 51.574 | -1.386   | -2.617%        | 69.93  | -0.1     | -0.143%        | 107.179 | -7.321   | -6.394%        |
| pixelate          | 3        | 58.76 | -6.44    | -9.877%        | 49.372 | -5.588   | -10.708%       | 65.294 | -4.736   | -6.763%        | 90.913  | -23.587  | -20.600%       |
| snow              | 3        | 55.52 | -9.68    | -14.847%       | 47.289 | -5.671   | -10.708%       | 64.892 | -5.138   | -7.337%        | 79.752  | -34.748  | -30.347%       |
| frost             | 3        | 55.43 | -9.77    | -14.985%       | 46.772 | -6.188   | -11.684%       | 65.222 | -4.808   | -6.866%        | 82.156  | -32.344  | -28.248%       |
| fog               | 3        | 61.42 | -3.78    | -5.798%        | 51.328 | -1.632   | -3.082%        | 68.58  | -1.45    | -2.070%        | 105.691 | -8.809   | -7.694%        |
| brightness        | 3        | 63.4  | -1.8     | -2.761%        | 51.725 | -1.235   | -2.332%        | 69.714 | -0.316   | -0.451%        | 111.483 | -3.017   | -2.635%        |
| spatter           | 3        | 59.87 | -5.33    | -8.175%        | 49.96  | -3.0     | -5.664%        | 68.092 | -1.938   | -2.767%        | 96.967  | -17.533  | -15.313%       |
| saturate          | 3        | 64.25 | -0.95    | -1.457%        | 51.821 | -1.139   | -2.151%        | 70.518 | 0.488    | 0.697%         | 112.453 | -2.047   | -1.788%        |

  

| corruption        | severity | VQA   |          |                | GQA    |          |                | NLVR   |          |                | Caption |          |                |
|-------------------|----------|-------|----------|----------------|--------|----------|----------------|--------|----------|----------------|---------|----------|----------------|
|                   |          | Acc   | Decrease | Decrease Ratio | Acc    | Decrease | Decrease Ratio | Acc    | Decrease | Decrease Ratio | CIDer   | Decrease | Decrease Ratio |
| impulse_noise     | 4        | 58.84 | -6.36    | -9.755%        | 49.396 | -3.564   | -6.730%        | 67.303 | -2.727   | -3.894%        | 93.77   | -20.73   | -18.105%       |
| gaussian_noise    | 4        | 59.07 | -6.13    | -9.402%        | 49.833 | -3.127   | -5.904%        | 67.059 | -2.971   | -4.242%        | 95.573  | -18.927  | -16.530%       |
| shot_noise        | 4        | 58.48 | -6.72    | -10.307%       | 50.04  | -2.92    | -5.144%        | 65.896 | -4.134   | -5.903%        | 92.981  | -21.519  | -18.794%       |
| speckle_noise     | 4        | 60.43 | -4.77    | -7.316%        | 50.684 | -2.276   | -4.298%        | 67.317 | -2.713   | -3.874%        | 100.908 | -13.992  | -12.220%       |
| zoom_blur         | 4        | 50.72 | -14.48   | -22.209%       | 44.538 | -8.422   | -15.902%       | 57.571 | -12.459  | -17.790%       | 44.394  | -70.106  | -61.228%       |
| defocus_blur      | 4        | 59.77 | -5.43    | -8.328%        | 50.151 | -2.809   | -5.304%        | 67.246 | -2.784   | -3.976%        | 94.926  | -19.574  | -17.095%       |
| motion_blur       | 4        | 58.71 | -6.49    | -9.954%        | 49.642 | -3.318   | -6.265%        | 66.413 | -3.617   | -5.165%        | 87.531  | -26.699  | -23.553%       |
| glass_blur        | 4        | 56.08 | -9.12    | -13.988%       | 47.058 | -5.902   | -11.144%       | 66.485 | -3.545   | -5.062%        | 79.98   | -34.52   | -30.148%       |
| gaussian_blur     | 4        | 60.8  | -4.4     | -6.748%        | 50.509 | -2.451   | -4.628%        | 67.978 | -2.052   | -2.931%        | 97.356  | -17.144  | -14.973%       |
| jpeg_compression  | 4        | 63.05 | -2.15    | -3.298%        | 51.169 | -1.791   | -3.382%        | 69.47  | -0.56    | -0.799%        | 107.974 | -6.526   | -5.699%        |
| contrast          | 4        | 57.65 | -7.55    | -11.580%       | 48.704 | -4.256   | -8.036%        | 65.423 | -4.607   | -6.579%        | 90.713  | -23.787  | -20.775%       |
| elastic_transform | 4        | 60.82 | -4.38    | -6.718%        | 49.587 | -3.373   | -6.370%        | 69.47  | -0.56    | -0.799%        | 99.136  | -15.364  | -13.418%       |
| pixelate          | 4        | 54.89 | -10.31   | -15.813%       | 46.208 | -6.752   | -12.750%       | 61.676 | -8.354   | -11.928%       | 73.596  | -40.904  | -35.724%       |
| snow              | 4        | 52.57 | -12.63   | -19.371%       | 45.095 | -7.865   | -14.852%       | 62.81  | -7.22    | -10.309%       | 64.88   | -49.62   | -43.336%       |
| frost             | 4        | 54.92 | -10.28   | -15.767%       | 46.915 | -6.045   | -11.414%       | 65.451 | -4.579   | -6.538%        | 78.524  | -35.976  | -31.420%       |
| fog               | 4        | 59.85 | -5.35    | -8.206%        | 50.143 | -2.817   | -5.319%        | 68.25  | -1.78    | -2.541%        | 100.76  | -13.74   | -12.000%       |
| brightness        | 4        | 62.56 | -2.64    | -4.049%        | 51.153 | -1.807   | -3.412%        | 69.011 | -1.019   | -1.455%        | 108.211 | -6.289   | -5.492%        |
| spatter           | 4        | 57.78 | -7.42    | -11.380%       | 48.251 | -4.709   | -8.992%        | 66.858 | -3.172   | -4.529%        | 86.919  | -27.581  | -24.088%       |
| saturate          | 4        | 61.38 | -3.82    | -5.859%        | 50.437 | -2.523   | -4.763%        | 68.322 | -1.708   | -2.439%        | 107.238 | -7.262   | -6.342%        |

  

| corruption     | severity | VQA   |          |                | GQA    |          |                | NLVR   |          |                | Caption |          |                |
|----------------|----------|-------|----------|----------------|--------|----------|----------------|--------|----------|----------------|---------|----------|----------------|
|                |          | Acc   | Decrease | Decrease Ratio | Acc    | Decrease | Decrease Ratio | Acc    | Decrease | Decrease Ratio | CIDer   | Decrease | Decrease Ratio |
| impulse_noise  | 5        | 54.94 | -10.26   | -15.736%       | 47.949 | -5.011   | -9.462%        | 64.762 | -5.268   | -7.522%        | 79.944  | -34.556  | -30.180%       |
| gaussian_noise | 5        | 54.79 | -10.41   | -15.966%       | 47.742 | -5.218   | -9.853%        | 64.59  | -5.44    | -7.768%        | 79.987  | -34.513  | -30.143%       |
| shot_noise     | 5        | 55.94 | -9.26    | -14.202%       | 48.076 | -4.884   | -9.222%        | 63.858 | -6.172   | -8.813%        | 84.561  | -29.939  | -26.148%       |
| speckle_noise  | 5        | 58.5  | -6.7     | -10.276%       | 49.563 | -3.997   | -6.415%        | 65.581 | -4.449   | -6.354%        |         |          |                |



Table 9: Performance and decrease ratio of Hyperformer on CLIP-BART against image corruptions given severity 1 to 5.

| corruption        | severity | VQA   |          |                | GQA    |          |                | NLVR   |          |                | Caption |          |                |
|-------------------|----------|-------|----------|----------------|--------|----------|----------------|--------|----------|----------------|---------|----------|----------------|
|                   |          | Acc   | Decrease | Decrease Ratio | Acc    | Decrease | Decrease Ratio | Acc    | Decrease | Decrease Ratio | CIDer   | Decrease | Decrease Ratio |
| impulse_noise     | 1        | 63.11 | -2.27    | -3.472%        | 51.113 | -1.407   | -2.679%        | 70.59  | -1.62    | -2.244%        | 108.315 | -6.553   | -5.705%        |
| gaussian_noise    | 1        | 64.11 | -1.27    | -1.942%        | 52.218 | -0.302   | -0.575%        | 71.236 | -0.974   | -1.349%        | 111.564 | -3.304   | -2.876%        |
| shot_noise        | 1        | 64.01 | -1.37    | -2.095%        | 51.773 | -0.747   | -1.422%        | 71.25  | -0.96    | -1.329%        | 111.913 | -2.955   | -2.573%        |
| speckle_noise     | 1        | 64.26 | -1.12    | -1.713%        | 51.988 | -0.532   | -1.014%        | 71.365 | -0.845   | -1.170%        | 111.887 | -2.981   | -2.596%        |
| zoom_blur         | 1        | 58.64 | -6.74    | -10.309%       | 49.284 | -3.236   | -6.161%        | 56.05  | -16.16   | -22.379%       | 86.759  | -28.109  | -24.470%       |
| defocus_blur      | 1        | 64.36 | -1.02    | -1.560%        | 52.194 | -0.326   | -0.620%        | 71.953 | -0.257   | -0.355%        | 111.434 | -3.434   | -2.989%        |
| motion_blur       | 1        | 64.19 | -1.19    | -1.820%        | 51.988 | -0.532   | -1.014%        | 71.394 | -0.816   | -1.130%        | 111.28  | -3.588   | -3.123%        |
| glass_blur        | 1        | 64.29 | -1.09    | -1.667%        | 52.29  | -0.23    | -0.438%        | 71.867 | -0.343   | -0.474%        | 110.75  | -4.118   | -3.585%        |
| gaussian_blur     | 1        | 65.14 | -0.24    | -0.367%        | 52.481 | -0.039   | -0.075%        | 72.025 | -0.185   | -0.256%        | 113.892 | -0.976   | -0.849%        |
| jpeg_compression  | 1        | 64.59 | -0.79    | -1.208%        | 52.218 | -0.302   | -0.575%        | 72.126 | -0.084   | -0.117%        | 113.208 | -1.66    | -1.445%        |
| contrast          | 1        | 64.11 | -1.27    | -1.942%        | 52.194 | -0.326   | -0.620%        | 71.107 | -1.103   | -1.528%        | 111.276 | -3.592   | -3.127%        |
| elastic_transform | 1        | 64.85 | -0.53    | -0.811%        | 52.488 | -0.032   | -0.060%        | 70.762 | -1.448   | -2.005%        | 111.751 | -3.117   | -2.713%        |
| pixelate          | 1        | 61.97 | -3.41    | -5.216%        | 51.153 | -1.367   | -2.603%        | 69.872 | -2.338   | -3.237%        | 102.682 | -12.186  | -10.609%       |
| snow              | 1        | 60.68 | -4.7     | -7.189%        | 50.231 | -2.289   | -4.359%        | 69.7   | -2.51    | -3.476%        | 99.589  | -15.279  | -13.302%       |
| frost             | 1        | 61.91 | -3.47    | -5.307%        | 50.342 | -2.178   | -4.147%        | 69.844 | -2.366   | -3.277%        | 103.414 | -11.454  | -9.971%        |
| fog               | 1        | 63.7  | -1.68    | -2.570%        | 52.186 | -0.334   | -0.635%        | 70.963 | -1.247   | -1.727%        | 110.747 | -4.121   | -3.588%        |
| brightness        | 1        | 64.96 | -0.42    | -0.642%        | 52.322 | -0.198   | -0.378%        | 71.681 | -0.529   | -0.733%        | 114.6   | -0.268   | -0.233%        |
| spatter           | 1        | 64.8  | -0.58    | -0.887%        | 52.25  | -0.27    | -0.514%        | 71.509 | -0.701   | -0.971%        | 113.441 | -4.227   | -3.424%        |
| saturate          | 1        | 62.41 | -2.97    | -4.543%        | 50.644 | -1.876   | -3.572%        | 70.604 | -1.606   | -2.224%        | 111.07  | -3.798   | -3.306%        |

  

| corruption        | severity | VQA   |          |                | GQA    |          |                | NLVR   |          |                | Caption |          |                |
|-------------------|----------|-------|----------|----------------|--------|----------|----------------|--------|----------|----------------|---------|----------|----------------|
|                   |          | Acc   | Decrease | Decrease Ratio | Acc    | Decrease | Decrease Ratio | Acc    | Decrease | Decrease Ratio | CIDer   | Decrease | Decrease Ratio |
| impulse_noise     | 2        | 62.56 | -2.82    | -4.313%        | 51.264 | -1.256   | -2.391%        | 69.858 | -2.352   | -3.257%        | 105.447 | -9.421   | -8.202%        |
| gaussian_noise    | 2        | 63.22 | -2.16    | -3.304%        | 51.28  | -1.24    | -2.361%        | 70.389 | -1.821   | -2.522%        | 108.798 | -6.07    | -5.285%        |
| shot_noise        | 2        | 63.2  | -2.18    | -3.334%        | 51.534 | -0.986   | -1.877%        | 70.791 | -1.419   | -1.965%        | 108.495 | -6.373   | -5.548%        |
| speckle_noise     | 2        | 63.8  | -1.58    | -2.417%        | 51.375 | -1.145   | -2.179%        | 70.619 | -1.591   | -2.204%        | 110.85  | -4.018   | -3.498%        |
| zoom_blur         | 2        | 55.69 | -9.69    | -14.821%       | 47.496 | -5.024   | -9.567%        | 61.389 | -10.821  | -14.985%       | 72.303  | -42.565  | -37.056%       |
| defocus_blur      | 2        | 63.91 | -1.47    | -2.248%        | 51.868 | -0.652   | -1.241%        | 71.064 | -1.146   | -1.588%        | 109.619 | -5.249   | -4.569%        |
| motion_blur       | 2        | 63.28 | -2.1     | -3.212%        | 51.67  | -0.85    | -1.619%        | 71.178 | -1.032   | -1.429%        | 107.325 | -7.543   | -6.566%        |
| glass_blur        | 2        | 63.23 | -2.15    | -3.288%        | 51.852 | -0.668   | -1.271%        | 70.733 | -1.477   | -2.045%        | 107.49  | -7.378   | -6.423%        |
| gaussian_blur     | 2        | 64.24 | -1.14    | -1.744%        | 51.932 | -0.588   | -1.120%        | 71.595 | -0.615   | -0.852%        | 110.869 | -3.999   | -3.482%        |
| jpeg_compression  | 2        | 64.52 | -0.86    | -1.315%        | 52.17  | -0.35    | -0.666%        | 71.796 | -0.414   | -0.574%        | 111.366 | -3.502   | -3.048%        |
| contrast          | 2        | 63.36 | -2.02    | -3.090%        | 51.821 | -0.699   | -1.332%        | 70.518 | -1.692   | -2.343%        | 109.591 | -5.277   | -4.594%        |
| elastic_transform | 2        | 61.92 | -3.46    | -5.292%        | 50.716 | -1.804   | -3.436%        | 68.049 | -4.161   | -5.762%        | 96.699  | -18.169  | -15.818%       |
| pixelate          | 2        | 61.24 | -4.14    | -6.332%        | 50.723 | -1.797   | -3.421%        | 67.36  | -4.85    | -6.716%        | 100.385 | -14.483  | -12.608%       |
| snow              | 2        | 57.78 | -7.6     | -11.624%       | 47.535 | -4.985   | -9.491%        | 67.145 | -5.065   | -7.014%        | 88.787  | -26.081  | -22.705%       |
| frost             | 2        | 58.72 | -6.66    | -10.187%       | 48.354 | -4.166   | -7.932%        | 68.451 | -3.759   | -5.205%        | 90.232  | -24.636  | -21.447%       |
| fog               | 2        | 63.02 | -2.36    | -3.610%        | 51.375 | -1.145   | -2.179%        | 67.073 | -1.537   | -2.113%        | 109.259 | -5.639   | -4.909%        |
| brightness        | 2        | 64.54 | -0.84    | -1.285%        | 52.258 | -0.262   | -0.499%        | 71.265 | -0.945   | -1.309%        | 112.945 | -1.923   | -1.674%        |
| spatter           | 2        | 61.69 | -3.69    | -5.644%        | 50.588 | -1.932   | -3.678%        | 70.26  | -1.95    | -2.701%        | 102.503 | -12.365  | -10.764%       |
| saturate          | 2        | 59.63 | -5.75    | -8.795%        | 50.223 | -2.297   | -4.374%        | 68.638 | -3.572   | -4.947%        | 105.416 | -9.452   | -8.228%        |

  

| corruption        | severity | VQA   |          |                | GQA    |          |                | NLVR   |          |                | Caption |          |                |
|-------------------|----------|-------|----------|----------------|--------|----------|----------------|--------|----------|----------------|---------|----------|----------------|
|                   |          | Acc   | Decrease | Decrease Ratio | Acc    | Decrease | Decrease Ratio | Acc    | Decrease | Decrease Ratio | CIDer   | Decrease | Decrease Ratio |
| impulse_noise     | 3        | 61.56 | -3.82    | -5.843%        | 50.954 | -1.566   | -2.982%        | 69.714 | -2.496   | -3.456%        | 102.727 | -12.141  | -10.569%       |
| gaussian_noise    | 3        | 62.05 | -3.33    | -5.093%        | 51.296 | -1.224   | -2.331%        | 69.528 | -2.682   | -3.714%        | 103.63  | -11.238  | -9.783%        |
| shot_noise        | 3        | 61.79 | -3.59    | -5.491%        | 51.145 | -1.375   | -2.618%        | 69.772 | -2.438   | -3.377%        | 104.573 | -10.295  | -8.962%        |
| speckle_noise     | 3        | 61.96 | -3.42    | -5.231%        | 51.129 | -1.391   | -2.649%        | 69.872 | -2.338   | -3.237%        | 105.375 | -9.493   | -8.264%        |
| zoom_blur         | 3        | 53.18 | -12.2    | -18.660%       | 45.341 | -7.179   | -13.669%       | 58.375 | -13.835  | -19.159%       | 58.544  | -56.324  | -49.034%       |
| defocus_blur      | 3        | 62.01 | -3.37    | -5.154%        | 50.771 | -1.749   | -3.330%        | 70.159 | -2.051   | -2.840%        | 103.089 | -11.779  | -10.254%       |
| motion_blur       | 3        | 61.69 | -3.69    | -5.644%        | 51.002 | -1.518   | -2.891%        | 69.025 | -3.185   | -4.410%        | 101.688 | -13.18   | -11.474%       |
| glass_blur        | 3        | 57.83 | -7.55    | -11.548%       | 47.997 | -4.523   | -8.613%        | 67.604 | -4.606   | -6.378%        | 86.674  | -28.194  | -24.545%       |
| gaussian_blur     | 3        | 62.8  | -2.58    | -3.946%        | 51.232 | -1.288   | -2.452%        | 70.174 | -2.036   | -2.820%        | 105.091 | -9.777   | -8.512%        |
| jpeg_compression  | 3        | 64.18 | -1.2     | -1.835%        | 51.948 | -0.572   | -1.089%        | 71.092 | -1.118   | -1.548%        | 110.729 | -4.139   | -3.603%        |
| contrast          | 3        | 62.11 | -3.27    | -5.002%        | 51.352 | -1.168   | -2.225%        | 69.399 | -2.811   | -3.893%        | 105.39  | -9.478   | -8.251%        |
| elastic_transform | 3        | 63.12 | -2.26    | -3.457%        | 51.55  | -0.97    | -1.846%        | 70.834 | -1.376   | -1.906%        | 107.145 | -7.723   | -6.723%        |
| pixelate          | 3        | 59.06 | -6.32    | -9.667%        | 49.253 | -3.267   | -6.221%        | 66.356 | -5.854   | -8.107%        | 91.132  | -22.736  | -20.664%       |
| snow              | 3        | 55.98 | -9.4     | -14.377%       | 46.875 | -5.645   | -10.747%       | 65.681 | -6.529   | -9.042%        | 80.277  | -34.591  | -30.114%       |
| frost             | 3        | 56.45 | -8.93    | -13.659%       | 47.392 | -5.128   | -9.763%        | 66.915 | -5.295   | -7.332%        | 80.946  | -33.922  | -29.531%       |
| fog               | 3        | 61.72 | -3.66    | -5.598%        | 50.867 | -1.653   | -3.148%        | 69.844 | -2.366   | -3.277%        | 106.669 | -8.199   | -7.138%        |
| brightness        | 3        | 63.77 | -1.61    | -2.463%        | 52.019 | -0.501   | -0.953%        | 70.891 | -1.319   | -1.826%        | 111.091 | -3.777   | -3.288%        |
| spatter           | 3        | 60.24 | -5.14    | -7.862%        | 49.69  | -2.83    | -5.389%        | 68.939 | -3.271   | -4.529%        | 96.355  | -18.513  | -16.117%       |
| saturate          | 3        | 64.46 | -0.92    | -1.407%        | 52.075 | -0.445   | -0.847%        | 71.322 | -0.888   | -1.230%        | 112.255 | -2.613   | -2.275%        |

  

| corruption        | severity | VQA   |          |                | GQA    |          |                | NLVR   |          |                | Caption |          |                |
|-------------------|----------|-------|----------|----------------|--------|----------|----------------|--------|----------|----------------|---------|----------|----------------|
|                   |          | Acc   | Decrease | Decrease Ratio | Acc    | Decrease | Decrease Ratio | Acc    | Decrease | Decrease Ratio | CIDer   | Decrease | Decrease Ratio |
| impulse_noise     | 4        | 59.22 | -6.16    | -9.422%        | 50.183 | -2.337   | -4.450%        | 67.647 | -4.563   | -6.318%        | 93.42   | -21.448  | -18.672%       |
| gaussian_noise    | 4        | 59.46 | -5.92    | -8.055%        | 50.08  | -2.44    | -4.478%        | 68.753 | -3.457   | -4.788%        | 95.94   | -18.928  | -16.478%       |
| shot_noise        | 4        | 58.77 | -6.61    | -10.110%       | 49.857 | -2.663   | -5.071%        | 67.49  | -4.72    | -6.537%        | 94.596  | -20.272  | -17.648%       |
| speckle_noise     | 4        | 60.51 | -4.87    | -7.449%        | 50.755 | -1.765   | -3.360%        | 68.566 | -3.644   | -5.046%        | 100.903 | -13.965  | -12.157%       |
| zoom_blur         | 4        | 51.39 | -13.99   | -21.398%       | 44.149 | -8.371   | -15.940%       | 56.595 | -15.615  | -21.624%       | 47.784  | -67.084  | -58.401%       |
| defocus_blur      | 4        | 60.34 | -5.04    | -7.709%        | 49.92  | -2.6     | -4.950%        | 69.284 | -2.926   | -4.052%        | 95.83   | -19.038  | -16.574%       |
| motion_blur       | 4        | 58.68 | -6.7     | -10.248%       | 49.69  | -2.83    | -5.389%        | 67.274 | -4.936   | -6.835%        | 89.69   | -25.178  | -21.919%       |
| glass_blur        | 4        | 56.26 | -9.12    | -13.949%       | 46.931 | -5.589   | -10.641%       | 67.246 | -4.964   | -6.875%        | 79.558  | -35.31   | -30.740%       |
| gaussian_blur     | 4        | 60.72 | -4.66    | -7.128%        | 50.453 | -2.067   | -3.935%        | 69.47  | -2.74    | -3.794%        | 97.964  | -16.904  | -14.716%       |
| jpeg_compression  | 4        | 63.0  | -2.38    | -3.640%        | 50.978 | -1.542   | -2.936%        | 70.719 | -1.491   | -2.065%        | 106.453 | -8.415   | -7.326%        |
| contrast          | 4        | 58.0  | -7.38    | -11.288%       | 49.07  | -3.45    | -6.569%        | 66.758 | -5.452   | -7.551%        | 92.122  | -22.746  | -19.802%       |
| elastic_transform | 4        | 61.26 | -4.12    | -6.302%        | 50.048 | -2.472   | -4.707%        | 70.016 | -2.194   | -3.039%        | 99.231  | -15.637  | -13.613%       |
| pixelate          | 4        | 55.17 | -10.21   | -15.616%       | 46.796 | -5.724   | -10.899%       | 63.356 | -8.854   | -12.262%       | 74.516  | -40.352  | -35.129%       |
| snow              | 4        | 52.96 | -12.42   | -18.997%       | 45.206 | -7.314   | -13.926%       | 63.471 | -8.739   | -12.103%       | 64.766  | -50.102  | -43.617%       |
| frost             | 4        | 55.09 | -10.29   | -15.739%       | 47.194 | -5.326   | -10.142%       | 66.643 | -5.567   | -7.710%        | 77.255  | -37.613  | -32.745%       |
| fog               | 4        | 60.07 | -5.31    | -8.122%        | 49.793 | -2.727   | -5.192%        | 68.796 | -3.414   | -4.728%        | 100.214 | -14.654  | -12.757%       |
| brightness        | 4        | 62.87 | -2.51    | -3.839%        | 50.906 | -1.614   | -3.072%        | 69.556 | -2.654   | -3.675%        | 107.822 | -7.046   | -6.134%        |
| spatter           | 4        | 57.89 | -7.49    | -11.456%       | 48.267 | -4.253   | -8.098%        | 66.915 | -5.295   | -7.332%        | 87.218  | -27.65   | -24.071%       |
| saturate          | 4        | 61.49 | -3.89    | -5.950%        | 49.928 | -2.592   | -4.934%        | 69.298 | -2.912   | -4.033%        | 105.786 | -9.082   | -7.906%        |

  

| corruption     | severity | VQA   |          |                | GQA    |          |                | NLVR   |          |                | Caption |          |                |
|----------------|----------|-------|----------|----------------|--------|----------|----------------|--------|----------|----------------|---------|----------|----------------|
|                |          | Acc   | Decrease | Decrease Ratio | Acc    | Decrease | Decrease Ratio | Acc    | Decrease | Decrease Ratio | CIDer   | Decrease | Decrease Ratio |
| impulse_noise  | 5        | 55.42 | -9.96    | -15.234%       | 47.806 | -4.714   | -8.976%        | 66.04  | -6.17    | -8.545%        | 81.486  | -33.382  | -29.061%       |
| gaussian_noise | 5        | 55.26 | -10.12   | -15.479%       | 47.925 | -4.595   | -8.749%        | 65.38  | -6.83    | -9.459%        | 81.184  | -33.684  | -29.324%       |
| shot_noise     | 5        | 56.2  | -9.18    | -14.041%       | 47.694 | -4.826   | -9.188%        | 65.509 | -6.701   | -9.280%        | 84.695  | -30.173  | -26.267%       |
| speckle_noise  | 5        | 58.93 | -6.45    | -8.865%        | 49.428 | -3.092   | -5.888%        | 66.915 | -5.205   | -7.329%        |         |          |                |

Table 10: Performance and decrease ratio of Multiple Adapters on CLIP-BART against image corruptions given severity 1 to 5.

| corruption        | severity | VQA   |          |                | GQA    |          |                | NLVR   |          |                | Caption |          |                |
|-------------------|----------|-------|----------|----------------|--------|----------|----------------|--------|----------|----------------|---------|----------|----------------|
|                   |          | Acc   | Decrease | Decrease Ratio | Acc    | Decrease | Decrease Ratio | Acc    | Decrease | Decrease Ratio | CIDer   | Decrease | Decrease Ratio |
| impulse_noise     | 1        | 63.08 | -2.22    | -3.400%        | 50.334 | -3.056   | -5.724%        | 69.341 | -0.069   | -0.099%        | 108.775 | -5.695   | -4.975%        |
| gaussian_noise    | 1        | 63.96 | -1.34    | -2.052%        | 50.525 | -2.865   | -5.367%        | 69.556 | 0.146    | 0.211%         | 112.055 | -2.415   | -2.110%        |
| shot_noise        | 1        | 64.1  | -1.2     | -1.838%        | 50.93  | -2.46    | -4.607%        | 69.628 | 0.218    | 0.314%         | 111.893 | -2.577   | -2.251%        |
| speckle_noise     | 1        | 64.28 | -1.02    | -1.562%        | 51.018 | -2.372   | -4.443%        | 69.556 | 0.146    | 0.211%         | 112.372 | -2.098   | -1.833%        |
| zoom_blur         | 1        | 58.67 | -6.63    | -10.153%       | 47.822 | -5.568   | -10.430%       | 57.686 | -11.724  | -16.891%       | 86.317  | -28.153  | -24.594%       |
| defocus_blur      | 1        | 64.49 | -0.81    | -1.240%        | 50.692 | -2.698   | -5.054%        | 70.418 | 1.008    | 1.452%         | 110.992 | -3.478   | -3.038%        |
| motion_blur       | 1        | 64.31 | -0.99    | -1.516%        | 51.01  | -2.38    | -4.458%        | 69.901 | 0.491    | 0.707%         | 110.947 | -3.523   | -3.078%        |
| glass_blur        | 1        | 64.43 | -0.87    | -1.332%        | 51.057 | -2.333   | -4.369%        | 70.561 | 1.151    | 1.659%         | 112.582 | -1.888   | -1.649%        |
| gaussian_blur     | 1        | 65.1  | -0.2     | -0.306%        | 51.169 | -2.221   | -4.161%        | 70.217 | 0.807    | 1.162%         | 113.692 | -0.778   | -0.679%        |
| jpeg_compression  | 1        | 64.7  | -0.6     | -0.919%        | 51.312 | -2.078   | -3.892%        | 69.958 | 0.548    | 0.790%         | 113.934 | -0.536   | -0.469%        |
| contrast          | 1        | 63.91 | -1.39    | -2.129%        | 50.167 | -3.223   | -6.037%        | 69.657 | 0.247    | 0.356%         | 111.583 | -2.887   | -2.522%        |
| elastic_transform | 1        | 64.63 | -0.67    | -1.026%        | 51.216 | -2.174   | -4.071%        | 69.427 | 0.017    | 0.025%         | 112.058 | -2.412   | -2.107%        |
| pixelate          | 1        | 61.72 | -3.58    | -5.482%        | 49.412 | -3.978   | -7.451%        | 68.466 | -0.944   | -1.361%        | 102.565 | -11.905  | -10.400%       |
| snow              | 1        | 60.6  | -4.7     | -7.198%        | 48.593 | -4.797   | -8.985%        | 68.193 | -1.217   | -1.753%        | 100.062 | -14.408  | -12.587%       |
| frost             | 1        | 61.74 | -3.56    | -5.452%        | 49.213 | -4.177   | -7.824%        | 68.394 | -1.016   | -1.464%        | 103.506 | -10.964  | -9.578%        |
| fog               | 1        | 63.34 | -1.96    | -3.002%        | 50.596 | -2.794   | -5.233%        | 69.241 | -0.169   | -0.244%        | 110.445 | -4.025   | -3.516%        |
| brightness        | 1        | 64.83 | -0.47    | -0.720%        | 51.177 | -2.213   | -4.146%        | 70.848 | 1.438    | 2.072%         | 113.991 | -0.479   | -0.419%        |
| spatter           | 1        | 64.72 | -0.58    | -0.888%        | 51.081 | -2.309   | -4.324%        | 70.461 | 1.051    | 1.514%         | 113.572 | -0.898   | -0.785%        |
| saturate          | 1        | 62.48 | -2.82    | -4.319%        | 50.588 | -2.802   | -5.248%        | 68.753 | -0.657   | -0.947%        | 110.804 | -3.666   | -3.203%        |

  

| corruption        | severity | VQA   |          |                | GQA    |          |                | NLVR   |          |                | Caption |          |                |
|-------------------|----------|-------|----------|----------------|--------|----------|----------------|--------|----------|----------------|---------|----------|----------------|
|                   |          | Acc   | Decrease | Decrease Ratio | Acc    | Decrease | Decrease Ratio | Acc    | Decrease | Decrease Ratio | CIDer   | Decrease | Decrease Ratio |
| impulse_noise     | 2        | 62.36 | -2.94    | -4.502%        | 49.889 | -3.501   | -6.558%        | 68.466 | -0.944   | -1.361%        | 106.537 | -7.933   | -6.930%        |
| gaussian_noise    | 2        | 63.33 | -1.97    | -3.017%        | 50.183 | -3.207   | -6.007%        | 69.054 | -0.356   | -0.513%        | 109.084 | -5.386   | -4.705%        |
| shot_noise        | 2        | 63.37 | -1.93    | -2.956%        | 50.358 | -3.032   | -5.679%        | 68.724 | -0.686   | -0.988%        | 109.293 | -5.177   | -4.523%        |
| speckle_noise     | 2        | 63.79 | -1.51    | -2.312%        | 50.668 | -2.722   | -5.099%        | 68.695 | -0.715   | -1.030%        | 110.266 | -4.204   | -3.673%        |
| zoom_blur         | 2        | 55.81 | -9.49    | -14.533%       | 45.436 | -7.954   | -14.897%       | 61.633 | -7.777   | -11.204%       | 70.867  | -43.603  | -38.091%       |
| defocus_blur      | 2        | 63.91 | -1.39    | -2.129%        | 50.27  | -3.12    | -5.843%        | 69.485 | 0.075    | 0.108%         | 108.924 | -5.546   | -4.845%        |
| motion_blur       | 2        | 63.24 | -2.06    | -3.155%        | 50.533 | -2.857   | -5.352%        | 69.37  | -0.04    | -0.058%        | 108.19  | -6.28    | -5.487%        |
| glass_blur        | 2        | 63.25 | -2.05    | -3.139%        | 50.517 | -2.873   | -5.382%        | 69.7   | 0.29     | 0.418%         | 107.653 | -6.817   | -5.955%        |
| gaussian_blur     | 2        | 64.24 | -1.06    | -1.623%        | 50.429 | -2.961   | -5.545%        | 69.915 | 0.505    | 0.728%         | 109.896 | -4.574   | -3.996%        |
| jpeg_compression  | 2        | 64.64 | -0.66    | -1.011%        | 51.272 | -2.118   | -3.967%        | 69.7   | 0.29     | 0.418%         | 113.017 | -1.453   | -1.269%        |
| contrast          | 2        | 63.0  | -2.3     | -3.522%        | 50.024 | -3.366   | -6.305%        | 68.781 | -0.629   | -0.906%        | 109.711 | -4.759   | -4.158%        |
| elastic_transform | 2        | 61.58 | -3.72    | -5.697%        | 49.229 | -4.161   | -7.794%        | 66.327 | -3.083   | -4.442%        | 97.907  | -16.563  | -14.469%       |
| pixelate          | 2        | 61.36 | -3.94    | -6.034%        | 49.094 | -4.296   | -8.047%        | 65.494 | -3.916   | -5.641%        | 99.54   | -14.93   | -13.042%       |
| snow              | 2        | 57.58 | -7.72    | -11.822%       | 46.152 | -7.238   | -13.557%       | 65.71  | -3.7     | -5.331%        | 88.051  | -26.419  | -23.079%       |
| frost             | 2        | 58.54 | -6.76    | -10.352%       | 47.384 | -6.006   | -11.249%       | 66.585 | -2.825   | -4.070%        | 91.664  | -22.806  | -19.923%       |
| fog               | 2        | 62.78 | -2.52    | -3.859%        | 49.968 | -3.422   | -6.409%        | 65.911 | -3.499   | -5.041%        | 109.097 | -5.373   | -4.693%        |
| brightness        | 2        | 64.17 | -1.13    | -1.730%        | 50.882 | -2.508   | -4.697%        | 70.159 | 0.749    | 1.080%         | 113.574 | -0.896   | -0.782%        |
| spatter           | 2        | 61.42 | -3.88    | -5.942%        | 49.595 | -3.795   | -7.109%        | 68.25  | -1.16    | -1.671%        | 104.378 | -10.992  | -8.816%        |
| saturate          | 2        | 59.52 | -5.78    | -8.851%        | 49.443 | -3.947   | -7.392%        | 67.03  | -2.38    | -3.428%        | 104.845 | -9.625   | -8.408%        |

  

| corruption        | severity | VQA   |          |                | GQA    |          |                | NLVR   |          |                | Caption |          |                |
|-------------------|----------|-------|----------|----------------|--------|----------|----------------|--------|----------|----------------|---------|----------|----------------|
|                   |          | Acc   | Decrease | Decrease Ratio | Acc    | Decrease | Decrease Ratio | Acc    | Decrease | Decrease Ratio | CIDer   | Decrease | Decrease Ratio |
| impulse_noise     | 3        | 61.63 | -3.67    | -5.620%        | 49.952 | -3.438   | -6.439%        | 68.179 | -1.231   | -1.774%        | 103.223 | -11.247  | -9.825%        |
| gaussian_noise    | 3        | 61.83 | -3.47    | -5.314%        | 49.436 | -3.954   | -7.407%        | 67.848 | -1.562   | -2.250%        | 103.956 | -10.514  | -9.185%        |
| shot_noise        | 3        | 61.65 | -3.65    | -5.590%        | 49.913 | -3.477   | -6.513%        | 68.15  | -1.26    | -1.816%        | 105.464 | -9.006   | -7.868%        |
| speckle_noise     | 3        | 62.13 | -3.17    | -4.855%        | 49.634 | -3.756   | -7.034%        | 67.963 | -1.447   | -2.084%        | 104.688 | -9.782   | -8.545%        |
| zoom_blur         | 3        | 53.22 | -12.08   | -18.499%       | 43.671 | -9.719   | -18.203%       | 59.495 | -9.915   | -14.285%       | 57.831  | -56.639  | -49.479%       |
| defocus_blur      | 3        | 62.13 | -3.17    | -4.855%        | 49.809 | -3.581   | -6.707%        | 68.595 | -0.815   | -1.174%        | 102.018 | -12.452  | -10.878%       |
| motion_blur       | 3        | 61.22 | -4.08    | -6.248%        | 49.92  | -3.47    | -6.498%        | 68.494 | -0.916   | -1.319%        | 100.004 | -14.466  | -12.638%       |
| glass_blur        | 3        | 58.46 | -6.84    | -10.475%       | 46.923 | -6.467   | -12.112%       | 66.915 | -2.495   | -3.594%        | 86.333  | -28.137  | -24.580%       |
| gaussian_blur     | 3        | 62.75 | -2.55    | -3.905%        | 50.342 | -3.048   | -5.709%        | 68.839 | -0.571   | -0.823%        | 104.781 | -9.689   | -8.464%        |
| jpeg_compression  | 3        | 63.91 | -1.39    | -2.129%        | 51.002 | -2.388   | -4.473%        | 69.284 | -0.126   | -0.182%        | 110.971 | -3.499   | -3.057%        |
| contrast          | 3        | 61.82 | -3.48    | -5.329%        | 49.364 | -4.026   | -7.541%        | 67.92  | -1.49    | -2.146%        | 105.282 | -9.188   | -8.027%        |
| elastic_transform | 3        | 63.33 | -1.97    | -3.017%        | 50.517 | -2.873   | -5.382%        | 69.399 | -0.011   | -0.016%        | 107.57  | -6.9     | -6.028%        |
| pixelate          | 3        | 58.99 | -6.31    | -9.663%        | 47.448 | -5.942   | -11.130%       | 64.518 | -4.892   | -7.047%        | 90.252  | -24.218  | -21.156%       |
| snow              | 3        | 55.69 | -9.61    | -14.717%       | 45.588 | -7.802   | -14.614%       | 64.203 | -5.207   | -7.502%        | 80.591  | -33.879  | -29.597%       |
| frost             | 3        | 56.14 | -9.16    | -14.028%       | 45.548 | -7.842   | -14.689%       | 64.877 | -4.533   | -6.530%        | 81.478  | -32.992  | -28.822%       |
| fog               | 3        | 61.56 | -3.74    | -5.727%        | 49.277 | -4.113   | -7.705%        | 68.695 | -0.715   | -1.030%        | 105.695 | -8.775   | -7.666%        |
| brightness        | 3        | 63.57 | -1.73    | -2.649%        | 50.557 | -2.833   | -5.307%        | 69.614 | 0.204    | 0.294%         | 111.594 | -2.876   | -2.513%        |
| spatter           | 3        | 60.04 | -5.26    | -8.055%        | 48.569 | -4.821   | -9.030%        | 67.662 | -1.748   | -2.519%        | 97.652  | -16.818  | -14.692%       |
| saturate          | 3        | 64.3  | -1.0     | -1.531%        | 50.572 | -2.818   | -5.277%        | 69.341 | -0.069   | -0.099%        | 112.884 | -1.586   | -1.385%        |

  

| corruption        | severity | VQA   |          |                | GQA    |          |                | NLVR   |          |                | Caption |          |                |
|-------------------|----------|-------|----------|----------------|--------|----------|----------------|--------|----------|----------------|---------|----------|----------------|
|                   |          | Acc   | Decrease | Decrease Ratio | Acc    | Decrease | Decrease Ratio | Acc    | Decrease | Decrease Ratio | CIDer   | Decrease | Decrease Ratio |
| impulse_noise     | 4        | 58.9  | -6.4     | -9.801%        | 48.744 | -6.646   | -8.702%        | 67.332 | -2.078   | -2.994%        | 94.511  | -19.959  | -17.436%       |
| gaussian_noise    | 4        | 59.01 | -6.29    | -9.632%        | 48.768 | -6.622   | -8.658%        | 67.389 | -2.021   | -2.912%        | 95.389  | -18.58   | -16.231%       |
| shot_noise        | 4        | 58.67 | -6.63    | -10.153%       | 48.696 | -6.694   | -8.792%        | 65.222 | -4.188   | -6.034%        | 94.179  | -20.291  | -17.726%       |
| speckle_noise     | 4        | 60.52 | -4.78    | -7.320%        | 49.459 | -3.931   | -7.362%        | 67.088 | -2.322   | -3.346%        | 101.029 | -13.441  | -11.742%       |
| zoom_blur         | 4        | 51.14 | -14.16   | -21.685%       | 42.789 | -10.601  | -19.856%       | 58.045 | -11.365  | -16.374%       | 47.052  | -67.418  | -58.896%       |
| defocus_blur      | 4        | 60.13 | -5.17    | -7.917%        | 49.03  | -4.36    | -8.166%        | 66.729 | -2.681   | -3.863%        | 94.96   | -19.51   | -17.044%       |
| motion_blur       | 4        | 58.83 | -6.47    | -9.908%        | 48.346 | -5.044   | -9.447%        | 66.183 | -3.227   | -4.649%        | 87.903  | -26.567  | -23.209%       |
| glass_blur        | 4        | 56.46 | -8.84    | -13.538%       | 45.794 | -7.596   | -14.227%       | 66.04  | -3.37    | -4.855%        | 80.082  | -34.388  | -30.041%       |
| gaussian_blur     | 4        | 60.74 | -4.56    | -6.983%        | 49.459 | -3.931   | -7.362%        | 67.676 | -1.734   | -2.498%        | 97.068  | -17.402  | -15.202%       |
| jpeg_compression  | 4        | 62.83 | -2.47    | -3.783%        | 50.286 | -3.104   | -5.813%        | 68.408 | -1.002   | -1.443%        | 108.016 | -6.454   | -5.638%        |
| contrast          | 4        | 57.75 | -7.55    | -11.562%       | 47.154 | -6.236   | -11.681%       | 64.346 | -5.064   | -7.295%        | 91.244  | -23.226  | -20.290%       |
| elastic_transform | 4        | 61.12 | -4.18    | -6.401%        | 48.489 | -4.901   | -9.179%        | 68.911 | -0.499   | -0.720%        | 99.838  | -14.632  | -12.783%       |
| pixelate          | 4        | 55.03 | -10.27   | -15.727%       | 44.697 | -8.693   | -16.282%       | 61.332 | -8.078   | -11.638%       | 74.043  | -40.427  | -35.317%       |
| snow              | 4        | 52.63 | -12.67   | -19.403%       | 43.512 | -9.878   | -18.501%       | 61.964 | -7.446   | -10.728%       | 65.313  | -49.157  | -42.943%       |
| frost             | 4        | 55.3  | -10.0    | -15.314%       | 45.842 | -7.548   | -14.138%       | 64.963 | -4.447   | -6.406%        | 78.01   | -36.46   | -31.851%       |
| fog               | 4        | 59.96 | -5.34    | -8.178%        | 48.545 | -4.845   | -9.075%        | 68.624 | -0.786   | -1.133%        | 100.679 | -13.791  | -12.048%       |
| brightness        | 4        | 62.52 | -2.78    | -4.257%        | 50.684 | -2.706   | -5.069%        | 68.236 | -1.174   | -1.691%        | 108.714 | -5.756   | -5.028%        |
| spatter           | 4        | 58.08 | -7.22    | -11.057%       | 46.995 | -6.395   | -11.978%       | 66.011 | -3.399   | -4.897%        | 86.949  | -27.521  | -24.042%       |
| saturate          | 4        | 61.53 | -3.77    | -5.773%        | 49.245 | -4.145   | -7.764%        | 68.394 | -1.016   | -1.464%        | 106.722 | -7.748   | -6.769%        |

  

| corruption     | severity | VQA   |          |                | GQA    |          |                | NLVR   |          |                | Caption |          |                |
|----------------|----------|-------|----------|----------------|--------|----------|----------------|--------|----------|----------------|---------|----------|----------------|
|                |          | Acc   | Decrease | Decrease Ratio | Acc    | Decrease | Decrease Ratio | Acc    | Decrease | Decrease Ratio | CIDer   | Decrease | Decrease Ratio |
| impulse_noise  | 5        | 55.27 | -10.03   | -15.360%       | 46.557 | -6.833   | -12.797%       | 64.504 | -4.906   | -7.068%        | 80.382  | -34.088  | -29.779%       |
| gaussian_noise | 5        | 55.26 | -10.04   | -15.375%       | 46.279 | -7.111   | -13.319%       | 63.801 | -5.609   | -8.081%        | 80.15   | -34.32   | -29.982%       |
| shot_noise     | 5        | 56.1  | -9.2     | -14.089%       | 46.796 | -6.594   | -12.551%       | 64.174 | -5.236   | -7.544%        | 83.148  | -31.322  | -27.362%       |
| speckle_noise  | 5        | 58.68 | -6.62    | -10.138%       | 48.315 | -5.075   | -9.506%        | 64.    |          |                |         |          |                |

Table 11: Performance and decrease ratio of Multiple Compacters on CLIP-BART against image corruptions given severity 1 to 5.

| corruption        | severity | VQA   |          |                | GQA    |          |                | NLVR   |          |                | Caption |          |                |
|-------------------|----------|-------|----------|----------------|--------|----------|----------------|--------|----------|----------------|---------|----------|----------------|
|                   |          | Acc   | Decrease | Decrease Ratio | Acc    | Decrease | Decrease Ratio | Acc    | Decrease | Decrease Ratio | CIDer   | Decrease | Decrease Ratio |
| impulse_noise     | 1        | 62.91 | -2.0     | -3.081%        | 51.542 | -1.208   | -2.289%        | 69.6   | 0.15     | 0.215%         | 109.258 | -5.902   | -5.125%        |
| gaussian_noise    | 1        | 63.8  | -1.11    | -1.710%        | 51.86  | -0.89    | -1.686%        | 70.159 | 0.709    | 1.021%         | 111.25  | -3.91    | -3.395%        |
| shot_noise        | 1        | 63.79 | -1.12    | -1.725%        | 51.654 | -1.096   | -2.078%        | 69.757 | 0.307    | 0.443%         | 112.222 | -2.938   | -2.552%        |
| speckle_noise     | 1        | 63.84 | -1.07    | -1.648%        | 51.709 | -1.041   | -1.973%        | 69.671 | 0.221    | 0.319%         | 112.337 | -2.723   | -2.364%        |
| zoom_blur         | 1        | 58.08 | -6.83    | -10.522%       | 48.736 | -4.014   | -7.610%        | 55.404 | -14.046  | -20.225%       | 87.068  | -28.092  | -24.394%       |
| defocus_blur      | 1        | 64.05 | -0.86    | -1.325%        | 51.876 | -0.874   | -1.656%        | 69.7   | 0.25     | 0.360%         | 112.029 | -3.131   | -2.719%        |
| motion_blur       | 1        | 63.68 | -1.23    | -1.895%        | 51.685 | -1.065   | -2.018%        | 69.772 | 0.322    | 0.463%         | 110.889 | -4.271   | -3.709%        |
| glass_blur        | 1        | 64.13 | -0.78    | -1.202%        | 51.972 | -0.778   | -1.475%        | 70.202 | 0.752    | 1.083%         | 111.888 | -3.272   | -2.841%        |
| gaussian_blur     | 1        | 64.83 | -0.08    | -0.123%        | 52.051 | -0.699   | -1.325%        | 70.059 | 0.609    | 0.877%         | 114.375 | -0.785   | -0.681%        |
| jpeg_compression  | 1        | 64.31 | -0.6     | -0.924%        | 51.797 | -0.953   | -1.807%        | 69.729 | 0.279    | 0.401%         | 114.174 | -0.986   | -0.856%        |
| contrast          | 1        | 63.55 | -1.36    | -2.095%        | 51.503 | -1.247   | -2.365%        | 68.896 | -0.554   | -0.797%        | 112.673 | -2.487   | -2.160%        |
| elastic_transform | 1        | 64.33 | -0.58    | -0.894%        | 52.433 | -0.317   | -0.601%        | 69.399 | -0.051   | -0.074%        | 111.789 | -3.371   | -2.927%        |
| pixelate          | 1        | 61.63 | -3.28    | -5.053%        | 50.676 | -2.074   | -3.932%        | 67.935 | -1.515   | -2.182%        | 102.462 | -12.698  | -11.027%       |
| snow              | 1        | 60.21 | -4.7     | -7.241%        | 49.34  | -3.41    | -6.464%        | 68.222 | -1.228   | -1.769%        | 100.004 | -15.156  | -13.161%       |
| frost             | 1        | 61.5  | -3.41    | -5.253%        | 50.509 | -2.241   | -4.249%        | 67.748 | -1.702   | -2.451%        | 103.147 | -12.013  | -10.431%       |
| fog               | 1        | 63.22 | -1.69    | -2.604%        | 51.344 | -1.406   | -2.666%        | 68.494 | -0.956   | -1.376%        | 111.403 | -3.757   | -3.262%        |
| brightness        | 1        | 64.59 | -0.32    | -0.493%        | 52.035 | -0.715   | -1.355%        | 69.93  | 0.48     | 0.691%         | 114.331 | -0.829   | -0.720%        |
| spatter           | 1        | 64.3  | -0.61    | -0.940%        | 52.147 | -0.603   | -1.144%        | 69.485 | 0.035    | 0.050%         | 113.694 | -1.466   | -1.273%        |
| saturate          | 1        | 62.44 | -2.47    | -3.805%        | 50.827 | -1.923   | -3.646%        | 68.423 | -1.027   | -1.479%        | 110.806 | -4.354   | -3.781%        |

  

| corruption        | severity | VQA   |          |                | GQA    |          |                | NLVR   |          |                | Caption |          |                |
|-------------------|----------|-------|----------|----------------|--------|----------|----------------|--------|----------|----------------|---------|----------|----------------|
|                   |          | Acc   | Decrease | Decrease Ratio | Acc    | Decrease | Decrease Ratio | Acc    | Decrease | Decrease Ratio | CIDer   | Decrease | Decrease Ratio |
| impulse_noise     | 2        | 62.05 | -2.86    | -4.406%        | 50.882 | -1.868   | -3.540%        | 68.71  | -0.74    | -1.066%        | 105.632 | -9.528   | -8.274%        |
| gaussian_noise    | 2        | 63.11 | -1.8     | -2.773%        | 51.344 | -1.406   | -2.666%        | 69.198 | -0.252   | -0.363%        | 108.818 | -6.342   | -5.507%        |
| shot_noise        | 2        | 63.08 | -1.83    | -2.819%        | 50.938 | -1.812   | -3.435%        | 68.624 | -0.826   | -1.190%        | 108.746 | -6.414   | -5.570%        |
| speckle_noise     | 2        | 63.24 | -1.67    | -2.573%        | 51.463 | -1.287   | -2.440%        | 68.939 | -0.511   | -0.735%        | 110.473 | -4.687   | -4.070%        |
| zoom_blur         | 2        | 55.66 | -9.25    | -14.251%       | 46.931 | -5.819   | -11.031%       | 59.854 | -9.596   | -13.818%       | 73.436  | -41.724  | -36.231%       |
| defocus_blur      | 2        | 63.36 | -1.55    | -2.388%        | 51.542 | -1.208   | -2.289%        | 69.341 | -0.109   | -0.157%        | 109.045 | -6.115   | -5.310%        |
| motion_blur       | 2        | 63.14 | -1.77    | -2.727%        | 51.073 | -1.677   | -3.179%        | 69.513 | 0.063    | 0.091%         | 108.323 | -6.837   | -5.937%        |
| glass_blur        | 2        | 62.89 | -2.02    | -3.112%        | 50.906 | -1.844   | -3.495%        | 68.882 | -0.568   | -0.818%        | 107.979 | -7.181   | -6.236%        |
| gaussian_blur     | 2        | 63.73 | -1.18    | -1.818%        | 51.67  | -1.08    | -2.048%        | 69.155 | -0.295   | -0.425%        | 110.774 | -4.386   | -3.808%        |
| jpeg_compression  | 2        | 64.34 | -0.57    | -0.878%        | 51.503 | -1.247   | -2.365%        | 69.542 | 0.092    | 0.133%         | 113.05  | -2.11    | -1.832%        |
| contrast          | 2        | 62.79 | -2.12    | -3.266%        | 51.026 | -1.724   | -3.269%        | 68.451 | -0.999   | -1.438%        | 111.137 | -4.023   | -3.494%        |
| elastic_transform | 2        | 61.17 | -3.74    | -5.762%        | 49.746 | -3.004   | -5.696%        | 66.241 | -3.209   | -4.621%        | 97.739  | -17.421  | -15.128%       |
| pixelate          | 2        | 60.86 | -4.05    | -6.239%        | 50.318 | -2.432   | -4.610%        | 65.509 | -3.941   | -5.675%        | 99.701  | -15.459  | -13.424%       |
| snow              | 2        | 57.45 | -7.46    | -11.493%       | 47.146 | -5.604   | -10.624%       | 65.782 | -3.668   | -5.282%        | 87.876  | -27.284  | -23.692%       |
| frost             | 2        | 58.22 | -6.69    | -10.307%       | 47.798 | -4.952   | -9.388%        | 66.743 | -2.707   | -3.897%        | 91.162  | -23.998  | -20.839%       |
| fog               | 2        | 62.46 | -2.45    | -3.774%        | 50.922 | -1.828   | -3.465%        | 65.035 | -4.415   | -6.357%        | 109.813 | -5.347   | -4.643%        |
| brightness        | 2        | 64.21 | -0.7     | -1.078%        | 52.035 | -0.715   | -1.355%        | 69.671 | 0.221    | 0.319%         | 113.438 | -1.722   | -1.495%        |
| spatter           | 2        | 61.25 | -3.66    | -5.639%        | 50.541 | -2.209   | -4.188%        | 68.064 | -1.386   | -1.996%        | 104.301 | -10.859  | -9.429%        |
| saturate          | 2        | 59.45 | -5.46    | -8.412%        | 49.992 | -2.758   | -5.228%        | 65.896 | -3.554   | -5.117%        | 106.233 | -8.927   | -7.751%        |

  

| corruption        | severity | VQA   |          |                | GQA    |          |                | NLVR   |          |                | Caption |          |                |
|-------------------|----------|-------|----------|----------------|--------|----------|----------------|--------|----------|----------------|---------|----------|----------------|
|                   |          | Acc   | Decrease | Decrease Ratio | Acc    | Decrease | Decrease Ratio | Acc    | Decrease | Decrease Ratio | CIDer   | Decrease | Decrease Ratio |
| impulse_noise     | 3        | 61.12 | -3.79    | -5.839%        | 50.207 | -2.543   | -4.821%        | 67.389 | -2.061   | -2.967%        | 103.652 | -11.508  | -9.993%        |
| gaussian_noise    | 3        | 61.59 | -3.32    | -5.115%        | 50.254 | -2.496   | -4.731%        | 68.695 | -0.755   | -1.087%        | 104.253 | -10.907  | -9.472%        |
| shot_noise        | 3        | 61.64 | -3.27    | -5.038%        | 50.692 | -2.058   | -3.902%        | 67.719 | -1.731   | -2.492%        | 103.954 | -11.206  | -9.731%        |
| speckle_noise     | 3        | 61.89 | -3.02    | -4.653%        | 50.167 | -2.583   | -4.897%        | 67.145 | -2.305   | -3.319%        | 104.78  | -10.38   | -9.014%        |
| zoom_blur         | 3        | 52.63 | -12.28   | -18.919%       | 45.23  | -7.52    | -14.256%       | 57.457 | -11.993  | -17.269%       | 60.191  | -54.969  | -47.733%       |
| defocus_blur      | 3        | 61.62 | -3.29    | -5.069%        | 50.564 | -2.186   | -4.143%        | 67.49  | -1.96    | -2.823%        | 102.858 | -12.302  | -10.682%       |
| motion_blur       | 3        | 61.19 | -3.72    | -5.731%        | 50.596 | -2.154   | -4.083%        | 67.92  | -1.53    | -2.203%        | 101.264 | -13.896  | -12.067%       |
| glass_blur        | 3        | 58.09 | -6.82    | -10.507%       | 47.05  | -5.7     | -10.805%       | 66.155 | -3.295   | -4.745%        | 87.811  | -27.349  | -23.749%       |
| gaussian_blur     | 3        | 62.08 | -2.63    | -4.052%        | 50.978 | -1.772   | -3.359%        | 67.877 | -1.573   | -2.265%        | 105.382 | -7.778   | -6.841%        |
| jpeg_compression  | 3        | 63.83 | -1.08    | -1.664%        | 51.383 | -1.367   | -2.591%        | 69.269 | -0.181   | -0.260%        | 112.577 | -2.583   | -2.243%        |
| contrast          | 3        | 61.62 | -3.29    | -5.069%        | 50.485 | -2.265   | -4.294%        | 67.518 | -1.932   | -2.781%        | 106.32  | -8.84    | -7.676%        |
| elastic_transform | 3        | 62.83 | -2.08    | -3.204%        | 51.073 | -1.677   | -3.179%        | 69.47  | 0.02     | 0.029%         | 108.308 | -6.852   | -5.950%        |
| pixelate          | 3        | 58.75 | -6.16    | -9.490%        | 48.744 | -4.006   | -7.595%        | 64.762 | -4.688   | -6.750%        | 89.903  | -25.257  | -21.932%       |
| snow              | 3        | 55.63 | -9.28    | -14.297%       | 46.732 | -6.018   | -11.408%       | 63.758 | -5.692   | -8.196%        | 80.18   | -34.98   | -30.375%       |
| frost             | 3        | 55.94 | -8.97    | -13.819%       | 46.43  | -6.32    | -11.981%       | 64.849 | -4.601   | -6.626%        | 81.889  | -33.271  | -28.891%       |
| fog               | 3        | 61.47 | -3.44    | -5.300%        | 50.429 | -2.321   | -4.399%        | 67.992 | -1.458   | -2.099%        | 106.65  | -8.51    | -7.390%        |
| brightness        | 3        | 63.41 | -1.5     | -2.311%        | 51.073 | -1.677   | -3.179%        | 68.796 | -0.654   | -0.942%        | 111.513 | -3.647   | -3.167%        |
| spatter           | 3        | 59.66 | -5.25    | -8.088%        | 49.197 | -3.553   | -6.736%        | 67.475 | -1.975   | -2.843%        | 97.537  | -17.623  | -15.303%       |
| saturate          | 3        | 63.93 | -0.98    | -1.510%        | 51.868 | -0.882   | -1.671%        | 69.327 | -0.123   | -0.177%        | 112.763 | -2.397   | -2.081%        |

  

| corruption        | severity | VQA   |          |                | GQA    |          |                | NLVR   |          |                | Caption |          |                |
|-------------------|----------|-------|----------|----------------|--------|----------|----------------|--------|----------|----------------|---------|----------|----------------|
|                   |          | Acc   | Decrease | Decrease Ratio | Acc    | Decrease | Decrease Ratio | Acc    | Decrease | Decrease Ratio | CIDer   | Decrease | Decrease Ratio |
| impulse_noise     | 4        | 58.74 | -6.17    | -9.505%        | 49.372 | -3.378   | -6.404%        | 66.657 | -2.793   | -4.021%        | 93.189  | -21.971  | -19.079%       |
| gaussian_noise    | 4        | 59.07 | -5.84    | -8.997%        | 50.278 | -2.472   | -4.686%        | 67.045 | -2.405   | -3.463%        | 95.92   | -19.24   | -16.707%       |
| shot_noise        | 4        | 58.38 | -6.53    | -10.060%       | 49.451 | -3.299   | -6.253%        | 66.298 | -3.152   | -4.538%        | 94.85   | -20.31   | -17.636%       |
| speckle_noise     | 4        | 60.22 | -4.69    | -7.225%        | 49.992 | -2.758   | -5.228%        | 66.571 | -2.879   | -4.145%        | 101.109 | -14.051  | -12.201%       |
| zoom_blur         | 4        | 50.81 | -14.1    | -21.722%       | 44.3   | -8.45    | -16.020%       | 55.548 | -13.902  | -20.018%       | 50.552  | -64.608  | -56.103%       |
| defocus_blur      | 4        | 59.83 | -5.08    | -7.826%        | 49.682 | -3.068   | -5.816%        | 66.298 | -3.152   | -4.538%        | 95.238  | -19.922  | -17.300%       |
| motion_blur       | 4        | 58.57 | -6.34    | -9.767%        | 48.609 | -4.141   | -7.851%        | 65.624 | -3.826   | -5.509%        | 88.685  | -26.475  | -22.990%       |
| glass_blur        | 4        | 56.46 | -8.45    | -13.018%       | 46.192 | -6.558   | -12.433%       | 64.791 | -4.659   | -6.708%        | 79.143  | -36.017  | -31.276%       |
| gaussian_blur     | 4        | 60.42 | -4.49    | -6.917%        | 50.286 | -2.464   | -4.671%        | 67.059 | -2.391   | -3.443%        | 98.009  | -17.151  | -14.893%       |
| jpeg_compression  | 4        | 62.67 | -2.24    | -3.451%        | 50.684 | -2.066   | -3.917%        | 68.652 | -0.798   | -1.149%        | 108.396 | -6.764   | -5.873%        |
| contrast          | 4        | 58.04 | -6.87    | -10.584%       | 47.965 | -4.785   | -9.072%        | 64.92  | -4.53    | -6.522%        | 92.385  | -22.775  | -19.777%       |
| elastic_transform | 4        | 61.07 | -3.84    | -5.916%        | 49.308 | -3.442   | -6.525%        | 68.164 | -1.851   | -2.595%        | 99.588  | -15.572  | -13.522%       |
| pixelate          | 4        | 54.99 | -9.92    | -15.283%       | 45.969 | -6.781   | -12.855%       | 60.471 | -8.979   | -12.929%       | 73.948  | -41.212  | -35.786%       |
| snow              | 4        | 52.96 | -11.95   | -18.410%       | 44.936 | -7.814   | -14.814%       | 61.605 | -7.845   | -11.296%       | 65.835  | -49.325  | -42.832%       |
| frost             | 4        | 55.0  | -9.91    | -15.267%       | 46.542 | -6.208   | -11.770%       | 64.906 | -4.544   | -6.543%        | 76.957  | -38.203  | -33.174%       |
| fog               | 4        | 59.78 | -5.13    | -7.903%        | 49.451 | -3.299   | -6.253%        | 67.647 | -1.803   | -2.595%        | 101.781 | -13.379  | -11.618%       |
| brightness        | 4        | 62.56 | -2.35    | -3.620%        | 50.421 | -2.329   | -4.414%        | 68.107 | -1.343   | -1.934%        | 109.146 | -6.014   | -5.222%        |
| spatter           | 4        | 57.58 | -7.33    | -11.293%       | 48.195 | -4.555   | -8.635%        | 65.294 | -4.156   | -5.985%        | 85.615  | -29.545  | -25.656%       |
| saturate          | 4        | 61.16 | -3.75    | -5.777%        | 49.666 | -3.084   | -5.846%        | 67.834 | -1.616   | -2.327%        | 106.231 | -8.929   | -7.754%        |

  

| corruption     | severity | VQA   |          |                | GQA    |          |                | NLVR   |          |                | Caption |          |                |
|----------------|----------|-------|----------|----------------|--------|----------|----------------|--------|----------|----------------|---------|----------|----------------|
|                |          | Acc   | Decrease | Decrease Ratio | Acc    | Decrease | Decrease Ratio | Acc    | Decrease | Decrease Ratio | CIDer   | Decrease | Decrease Ratio |
| impulse_noise  | 5        | 54.97 | -9.94    | -15.314%       | 47.527 | -5.223   | -9.901%        | 63.873 | -5.577   | -8.031%        | 80.384  | -34.776  | -30.198%       |
| gaussian_noise | 5        | 55.18 | -9.73    | -14.990%       | 47.098 | -5.652   | -10.714%       | 64.49  | -4.96    | -7.142%        | 81.337  | -33.823  | -29.370%       |
| shot_noise     | 5        | 55.66 | -9.25    | -14.251%       | 47.146 | -5.604   | -10.624%       | 63.959 | -5.491   | -7.907%        | 84.001  | -31.159  | -27.057%       |
| speckle_noise  | 5        | 58.45 | -6.46    | -9.952%        | 48.895 | -3.855   | -7.308%        | 65.451 | -        |                |         |          |                |

Table 12: Performance and decrease ratio of Multiple LoRA on CLIP-BART against image corruptions given severity 1 to 5.

| corruption        | severity | VQA   |          |                | GQA    |          |                | NLVR   |          |                | Caption |          |                |
|-------------------|----------|-------|----------|----------------|--------|----------|----------------|--------|----------|----------------|---------|----------|----------------|
|                   |          | Acc   | Decrease | Decrease Ratio | Acc    | Decrease | Decrease Ratio | Acc    | Decrease | Decrease Ratio | CIDer   | Decrease | Decrease Ratio |
| impulse_noise     | 1        | 63.12 | -2.32    | -3.545%        | 51.662 | -0.388   | -0.746%        | 50.337 | -0.983   | -1.915%        | 109.536 | -5.871   | -5.087%        |
| gaussian_noise    | 1        | 64.13 | -1.31    | -2.002%        | 52.011 | -0.039   | -0.074%        | 50.825 | -0.495   | -0.964%        | 112.679 | -2.728   | -2.363%        |
| shot_noise        | 1        | 64.1  | -1.34    | -2.048%        | 51.701 | -0.349   | -0.670%        | 50.466 | -0.854   | -1.663%        | 112.511 | -2.896   | -2.510%        |
| speckle_noise     | 1        | 64.18 | -1.26    | -1.925%        | 51.868 | -0.182   | -0.349%        | 50.682 | -0.638   | -1.244%        | 112.6   | -2.807   | -2.432%        |
| zoom_blur         | 1        | 58.12 | -7.32    | -11.186%       | 48.958 | -3.092   | -5.939%        | 50.251 | -1.069   | -2.083%        | 86.91   | -28.497  | -24.693%       |
| defocus_blur      | 1        | 64.35 | -1.09    | -1.666%        | 51.98  | -0.07    | -0.135%        | 50.911 | -0.409   | -0.796%        | 112.669 | -2.738   | -2.373%        |
| motion_blur       | 1        | 64.09 | -1.35    | -2.063%        | 51.646 | -0.404   | -0.777%        | 51.816 | 0.496    | 0.966%         | 109.514 | -5.893   | -5.106%        |
| glass_blur        | 1        | 64.13 | -1.31    | -2.002%        | 51.996 | -0.054   | -0.105%        | 51.055 | -0.265   | -0.516%        | 111.24  | -4.167   | -3.610%        |
| gaussian_blur     | 1        | 65.0  | -0.44    | -0.672%        | 51.884 | -0.166   | -0.318%        | 51.73  | 0.41     | 0.798%         | 114.48  | -0.927   | -0.803%        |
| jpeg_compression  | 1        | 64.89 | -0.55    | -0.840%        | 51.829 | -0.221   | -0.425%        | 50.825 | -0.495   | -0.964%        | 113.78  | -1.627   | -1.410%        |
| contrast          | 1        | 63.63 | -1.81    | -2.766%        | 52.147 | 0.097    | 0.186%         | 51.184 | -0.136   | -0.265%        | 112.217 | -3.19    | -2.764%        |
| elastic_transform | 1        | 64.63 | -0.81    | -1.238%        | 52.123 | 0.073    | 0.140%         | 50.825 | -0.495   | -0.964%        | 112.606 | -2.801   | -2.427%        |
| pixelate          | 1        | 61.31 | -4.13    | -6.311%        | 50.62  | -1.43    | -2.747%        | 50.868 | -0.452   | -0.880%        | 103.256 | -12.151  | -10.529%       |
| snow              | 1        | 60.23 | -5.21    | -7.961%        | 49.467 | -2.583   | -4.962%        | 51.012 | -0.308   | -0.600%        | 101.293 | -14.114  | -12.230%       |
| frost             | 1        | 61.65 | -3.79    | -5.792%        | 50.453 | -1.597   | -3.068%        | 50.466 | -0.854   | -1.663%        | 103.413 | -11.994  | -10.393%       |
| fog               | 1        | 63.41 | -2.03    | -3.102%        | 51.932 | -0.118   | -0.227%        | 51.069 | -0.251   | -0.488%        | 111.682 | -3.725   | -3.228%        |
| brightness        | 1        | 65.16 | -0.28    | -0.428%        | 51.956 | -0.094   | -0.181%        | 51.471 | 0.151    | 0.295%         | 114.623 | -0.784   | -0.679%        |
| spatter           | 1        | 64.6  | -0.84    | -1.284%        | 52.107 | 0.057    | 0.109%         | 51.457 | 0.137    | 0.267%         | 113.683 | -1.724   | -1.494%        |
| saturate          | 1        | 62.62 | -2.82    | -4.309%        | 50.843 | -1.207   | -2.319%        | 51.687 | 0.367    | 0.714%         | 111.041 | -4.366   | -3.783%        |

  

| corruption        | severity | VQA   |          |                | GQA    |          |                | NLVR   |          |                | Caption |          |                |
|-------------------|----------|-------|----------|----------------|--------|----------|----------------|--------|----------|----------------|---------|----------|----------------|
|                   |          | Acc   | Decrease | Decrease Ratio | Acc    | Decrease | Decrease Ratio | Acc    | Decrease | Decrease Ratio | CIDer   | Decrease | Decrease Ratio |
| impulse_noise     | 2        | 62.37 | -3.07    | -4.691%        | 51.065 | -0.985   | -1.892%        | 50.825 | -0.495   | -0.964%        | 107.512 | -7.895   | -6.841%        |
| gaussian_noise    | 2        | 63.44 | -2.0     | -3.056%        | 50.986 | -1.064   | -2.044%        | 50.524 | -0.796   | -1.551%        | 110.583 | -4.824   | -4.180%        |
| shot_noise        | 2        | 63.01 | -2.43    | -3.713%        | 51.081 | -0.969   | -1.861%        | 50.28  | -1.04    | -2.027%        | 109.63  | -5.777   | -5.006%        |
| speckle_noise     | 2        | 63.76 | -1.68    | -2.567%        | 51.526 | -0.524   | -1.006%        | 50.825 | -0.495   | -0.964%        | 110.645 | -4.762   | -4.126%        |
| zoom_blur         | 2        | 55.11 | -10.33   | -15.785%       | 47.591 | -4.459   | -8.567%        | 50.309 | -1.011   | -1.971%        | 71.368  | -44.039  | -38.160%       |
| defocus_blur      | 2        | 63.52 | -1.92    | -2.934%        | 51.479 | -0.571   | -1.097%        | 51.27  | -0.05    | -0.097%        | 109.676 | -5.731   | -4.966%        |
| motion_blur       | 2        | 63.03 | -2.41    | -3.683%        | 51.685 | -0.365   | -0.700%        | 50.682 | -0.638   | -1.244%        | 107.564 | -7.843   | -6.796%        |
| glass_blur        | 2        | 62.88 | -2.56    | -3.912%        | 51.288 | -0.762   | -1.464%        | 50.696 | -0.624   | -1.216%        | 108.29  | -7.117   | -6.167%        |
| gaussian_blur     | 2        | 63.93 | -1.51    | -2.307%        | 51.924 | -0.126   | -0.242%        | 51.17  | -0.15    | -0.293%        | 111.553 | -3.854   | -3.339%        |
| jpeg_compression  | 2        | 64.62 | -0.82    | -1.253%        | 51.765 | -0.285   | -0.548%        | 50.825 | -0.495   | -0.964%        | 113.349 | -2.058   | -1.783%        |
| contrast          | 2        | 63.1  | -2.34    | -3.576%        | 51.463 | -0.587   | -1.128%        | 51.27  | -0.05    | -0.097%        | 109.559 | -5.848   | -5.067%        |
| elastic_transform | 2        | 61.44 | -4.0     | -6.112%        | 50.501 | -1.549   | -2.976%        | 50.438 | -0.882   | -1.719%        | 98.119  | -17.288  | -14.980%       |
| pixelate          | 2        | 60.91 | -4.53    | -6.922%        | 50.747 | -1.303   | -2.503%        | 50.495 | -0.825   | -1.607%        | 100.503 | -14.904  | -12.914%       |
| snow              | 2        | 57.53 | -7.91    | -12.087%       | 47.567 | -4.483   | -8.613%        | 50.122 | -1.198   | -2.334%        | 89.818  | -25.589  | -22.173%       |
| frost             | 2        | 57.92 | -7.52    | -11.491%       | 48.799 | -3.251   | -6.245%        | 49.864 | -1.456   | -2.838%        | 91.825  | -23.582  | -20.434%       |
| fog               | 2        | 62.57 | -2.87    | -4.386%        | 51.805 | -0.245   | -0.471%        | 50.438 | -0.882   | -1.719%        | 110.05  | -5.357   | -4.642%        |
| brightness        | 2        | 64.31 | -1.13    | -1.727%        | 51.733 | -0.317   | -0.609%        | 51.213 | -0.107   | -0.209%        | 114.086 | -1.321   | -1.144%        |
| spatter           | 2        | 61.08 | -4.36    | -6.663%        | 50.676 | -1.374   | -2.640%        | 51.227 | -0.093   | -0.181%        | 105.197 | -10.21   | -8.847%        |
| saturate          | 2        | 59.48 | -5.96    | -9.108%        | 49.928 | -2.122   | -4.076%        | 50.797 | -0.523   | -1.020%        | 105.874 | -9.533   | -8.260%        |

  

| corruption        | severity | VQA   |          |                | GQA    |          |                | NLVR   |          |                | Caption |          |                |
|-------------------|----------|-------|----------|----------------|--------|----------|----------------|--------|----------|----------------|---------|----------|----------------|
|                   |          | Acc   | Decrease | Decrease Ratio | Acc    | Decrease | Decrease Ratio | Acc    | Decrease | Decrease Ratio | CIDer   | Decrease | Decrease Ratio |
| impulse_noise     | 3        | 61.46 | -3.98    | -6.082%        | 50.652 | -1.398   | -2.686%        | 50.093 | -1.227   | -2.390%        | 104.261 | -11.146  | -9.658%        |
| gaussian_noise    | 3        | 61.81 | -3.63    | -5.547%        | 50.533 | -1.517   | -2.915%        | 50.983 | -0.337   | -0.656%        | 105.488 | -9.919   | -8.594%        |
| shot_noise        | 3        | 61.63 | -3.81    | -5.822%        | 50.286 | -1.764   | -3.389%        | 50.538 | -0.782   | -1.523%        | 105.624 | -9.783   | -8.477%        |
| speckle_noise     | 3        | 61.7  | -3.74    | -5.715%        | 50.708 | -1.342   | -2.579%        | 50.194 | -1.126   | -2.195%        | 105.934 | -9.473   | -8.208%        |
| zoom_blur         | 3        | 52.57 | -12.87   | -19.667%       | 46.247 | -5.803   | -11.148%       | 49.993 | -1.327   | -2.586%        | 57.065  | -58.342  | -50.553%       |
| defocus_blur      | 3        | 61.82 | -3.62    | -5.532%        | 50.739 | -1.311   | -2.518%        | 50.538 | -0.782   | -1.523%        | 102.845 | -12.562  | -10.885%       |
| motion_blur       | 3        | 61.12 | -4.32    | -6.601%        | 50.962 | -1.088   | -2.090%        | 50.266 | -1.054   | -2.055%        | 101.771 | -13.636  | -11.816%       |
| glass_blur        | 3        | 58.06 | -7.38    | -11.278%       | 48.561 | -3.489   | -6.703%        | 50.323 | -0.997   | -1.943%        | 87.648  | -27.759  | -24.053%       |
| gaussian_blur     | 3        | 62.43 | -3.01    | -4.600%        | 50.835 | -1.215   | -2.335%        | 50.725 | -0.595   | -1.160%        | 105.609 | -9.798   | -8.490%        |
| jpeg_compression  | 3        | 63.92 | -1.52    | -2.323%        | 51.638 | -0.412   | -0.792%        | 50.667 | -0.653   | -1.272%        | 112.413 | -2.994   | -2.594%        |
| contrast          | 3        | 61.78 | -3.66    | -5.593%        | 50.517 | -1.533   | -2.946%        | 50.208 | -1.112   | -2.167%        | 105.746 | -9.661   | -8.371%        |
| elastic_transform | 3        | 63.18 | -2.26    | -3.454%        | 51.701 | -0.349   | -0.670%        | 50.868 | -0.452   | -0.880%        | 107.495 | -7.912   | -6.855%        |
| pixelate          | 3        | 58.85 | -6.59    | -10.070%       | 48.784 | -3.266   | -6.276%        | 50.696 | -0.624   | -1.216%        | 90.566  | -24.841  | -21.524%       |
| snow              | 3        | 55.67 | -9.77    | -14.930%       | 47.233 | -4.817   | -9.254%        | 50.71  | -0.61    | -1.188%        | 81.606  | -33.801  | -29.289%       |
| frost             | 3        | 55.75 | -9.69    | -14.807%       | 47.106 | -4.944   | -9.498%        | 50.94  | -0.38    | -0.740%        | 82.465  | -32.942  | -28.544%       |
| fog               | 3        | 61.33 | -4.11    | -6.281%        | 51.28  | -0.77    | -1.479%        | 50.969 | -0.351   | -0.684%        | 106.73  | -8.677   | -7.518%        |
| brightness        | 3        | 63.5  | -1.94    | -2.965%        | 51.606 | -0.444   | -0.853%        | 50.624 | -0.696   | -1.355%        | 111.08  | -4.327   | -3.749%        |
| spatter           | 3        | 59.41 | -6.03    | -9.215%        | 49.555 | -2.495   | -4.994%        | 50.524 | -0.796   | -1.551%        | 98.194  | -17.213  | -14.915%       |
| saturate          | 3        | 64.37 | -1.07    | -1.635%        | 51.566 | -0.484   | -0.929%        | 51.342 | 0.022    | 0.043%         | 113.511 | -1.896   | -1.643%        |

  

| corruption        | severity | VQA   |          |                | GQA    |          |                | NLVR   |          |                | Caption |          |                |
|-------------------|----------|-------|----------|----------------|--------|----------|----------------|--------|----------|----------------|---------|----------|----------------|
|                   |          | Acc   | Decrease | Decrease Ratio | Acc    | Decrease | Decrease Ratio | Acc    | Decrease | Decrease Ratio | CIDer   | Decrease | Decrease Ratio |
| impulse_noise     | 4        | 58.99 | -6.45    | -9.856%        | 49.825 | -2.225   | -4.275%        | 49.519 | -1.801   | -3.509%        | 95.12   | -20.287  | -17.579%       |
| gaussian_noise    | 4        | 59.3  | -6.14    | -9.383%        | 49.269 | -2.781   | -5.344%        | 49.663 | -1.657   | -3.229%        | 96.011  | -18.496  | -16.027%       |
| shot_noise        | 4        | 58.57 | -6.87    | -10.498%       | 49.738 | -2.312   | -4.443%        | 49.677 | -1.643   | -3.201%        | 95.136  | -20.271  | -17.565%       |
| speckle_noise     | 4        | 60.4  | -5.04    | -7.702%        | 49.849 | -2.201   | -4.229%        | 49.792 | -1.528   | -2.978%        | 102.055 | -13.352  | -11.569%       |
| zoom_blur         | 4        | 50.6  | -14.84   | -22.677%       | 44.975 | -7.075   | -13.592%       | 50.538 | -0.782   | -1.523%        | 47.061  | -68.346  | -59.222%       |
| defocus_blur      | 4        | 60.02 | -5.42    | -8.282%        | 50.246 | -1.804   | -3.465%        | 49.534 | -1.786   | -3.481%        | 95.916  | -19.491  | -16.889%       |
| motion_blur       | 4        | 58.55 | -6.89    | -10.529%       | 49.602 | -2.448   | -4.702%        | 49.734 | -1.586   | -3.090%        | 89.346  | -26.061  | -22.582%       |
| glass_blur        | 4        | 56.15 | -9.29    | -14.196%       | 46.939 | -5.111   | -9.819%        | 49.677 | -1.643   | -3.201%        | 80.448  | -34.959  | -30.292%       |
| gaussian_blur     | 4        | 60.7  | -4.74    | -7.243%        | 50.398 | -1.652   | -3.175%        | 49.72  | -1.6     | -3.117%        | 98.408  | -16.999  | -14.730%       |
| jpeg_compression  | 4        | 62.77 | -2.67    | -4.080%        | 51.105 | -0.945   | -1.815%        | 50.696 | -0.624   | -1.216%        | 107.297 | -8.11    | -7.027%        |
| contrast          | 4        | 57.84 | -7.6     | -11.614%       | 49.221 | -2.829   | -5.435%        | 49.72  | -1.6     | -3.117%        | 92.806  | -22.601  | -19.584%       |
| elastic_transform | 4        | 60.89 | -4.55    | -6.953%        | 50.072 | -1.978   | -3.801%        | 50.323 | -0.997   | -1.943%        | 99.063  | -16.344  | -14.162%       |
| pixelate          | 4        | 54.64 | -10.8    | -16.504%       | 46.971 | -5.079   | -9.758%        | 49.806 | -1.514   | -2.950%        | 73.645  | -41.762  | -36.187%       |
| snow              | 4        | 52.46 | -12.98   | -19.835%       | 45.126 | -6.924   | -13.302%       | 49.132 | -2.188   | -4.264%        | 65.607  | -49.8    | -43.151%       |
| frost             | 4        | 55.16 | -10.28   | -15.709%       | 47.249 | -4.801   | -9.224%        | 50.352 | -0.968   | -1.887%        | 79.326  | -36.081  | -31.264%       |
| fog               | 4        | 60.03 | -5.41    | -8.267%        | 50.429 | -1.621   | -3.114%        | 50.38  | -0.94    | -1.831%        | 101.394 | -14.013  | -12.142%       |
| brightness        | 4        | 62.7  | -2.74    | -4.187%        | 51.312 | -0.738   | -1.418%        | 50.409 | -0.911   | -1.775%        | 109.221 | -6.186   | -5.360%        |
| spatter           | 4        | 57.6  | -7.84    | -11.980%       | 48.251 | -3.799   | -7.299%        | 50.897 | -0.423   | -0.824%        | 87.559  | -27.848  | -24.130%       |
| saturate          | 4        | 61.37 | -4.07    | -6.219%        | 49.698 | -2.352   | -4.519%        | 50.954 | -0.366   | -0.712%        | 107.309 | -8.898   | -7.016%        |

  

| corruption     | severity | VQA   |          |                | GQA    |          |                | NLVR   |          |                | Caption |          |                |
|----------------|----------|-------|----------|----------------|--------|----------|----------------|--------|----------|----------------|---------|----------|----------------|
|                |          | Acc   | Decrease | Decrease Ratio | Acc    | Decrease | Decrease Ratio | Acc    | Decrease | Decrease Ratio | CIDer   | Decrease | Decrease Ratio |
| impulse_noise  | 5        | 55.13 | -10.31   | -15.755%       | 48.052 | -3.998   | -7.681%        | 49.849 | -1.471   | -2.866%        | 80.405  | -35.002  | -30.329%       |
| gaussian_noise | 5        | 55.16 | -10.28   | -15.709%       | 47.837 | -4.213   | -8.093%        | 49.892 | -1.428   | -2.782%        | 80.375  | -35.032  | -30.355%       |
| shot_noise     | 5        | 55.92 | -9.52    | -14.548%       | 47.655 | -4.395   | -8.445%        | 49.548 | -1.772   | -3.453%        | 84.802  | -30.605  | -26.520%       |
| speckle_noise  | 5        | 58.31 | -7.13    | -10.895%       | 49.253 | -2.797   | -5.374%        | 49.361 | -1.959   | -3             |         |          |                |

Table 13: Performance and decrease ratio of Multiple Prompts on CLIP-BART against image corruptions given severity 1 to 5.

| corruption        | severity | VQA   |          |                | GQA    |          |                | NLVR   |          |                | Caption |          |                |
|-------------------|----------|-------|----------|----------------|--------|----------|----------------|--------|----------|----------------|---------|----------|----------------|
|                   |          | Acc   | Decrease | Decrease Ratio | Acc    | Decrease | Decrease Ratio | Acc    | Decrease | Decrease Ratio | CIDer   | Decrease | Decrease Ratio |
| impulse_noise     | 1        | 46.27 | -0.54    | -1.154%        | 33.519 | -0.491   | -1.444%        | 49.892 | 0.022    | 0.045%         | 102.255 | -6.364   | -5.859%        |
| gaussian_noise    | 1        | 46.4  | -0.41    | -0.876%        | 33.567 | -0.443   | -1.304%        | 49.763 | -0.107   | -0.214%        | 105.318 | -3.301   | -3.039%        |
| shot_noise        | 1        | 46.33 | -0.48    | -1.025%        | 33.455 | -0.555   | -1.631%        | 49.706 | -0.164   | -0.329%        | 105.515 | -3.104   | -2.857%        |
| speckle_noise     | 1        | 46.34 | -0.47    | -1.004%        | 33.63  | -0.38    | -1.117%        | 49.347 | -0.523   | -1.049%        | 105.513 | -3.106   | -2.859%        |
| zoom_blur         | 1        | 44.04 | -2.77    | -5.918%        | 32.104 | -1.906   | -5.605%        | 50.122 | 0.252    | 0.505%         | 81.915  | -26.704  | -24.585%       |
| defocus_blur      | 1        | 46.61 | -0.2     | -0.427%        | 34.147 | 0.137    | 0.403%         | 49.749 | -0.121   | -0.243%        | 105.641 | -2.978   | -2.742%        |
| motion_blur       | 1        | 46.49 | -0.32    | -0.684%        | 33.861 | -0.149   | -0.439%        | 50.079 | 0.209    | 0.419%         | 104.123 | -4.496   | -4.139%        |
| glass_blur        | 1        | 46.57 | -0.24    | -0.513%        | 33.686 | -0.324   | -0.953%        | 49.419 | -0.451   | -0.905%        | 105.202 | -3.417   | -3.146%        |
| gaussian_blur     | 1        | 46.71 | -0.1     | -0.214%        | 34.282 | 0.272    | 0.800%         | 49.577 | -0.293   | -0.588%        | 107.209 | -1.41    | -1.298%        |
| jpeg_compression  | 1        | 46.53 | -0.28    | -0.598%        | 33.574 | -0.436   | -1.281%        | 50.093 | 0.223    | 0.448%         | 106.695 | -1.924   | -1.771%        |
| contrast          | 1        | 45.93 | -0.88    | -1.880%        | 34.075 | 0.065    | 0.192%         | 49.72  | -0.15    | -0.301%        | 104.794 | -3.825   | -3.521%        |
| elastic_transform | 1        | 46.49 | -0.32    | -0.684%        | 33.829 | -0.181   | -0.532%        | 49.849 | -0.021   | -0.042%        | 105.12  | -3.499   | -3.222%        |
| pixelate          | 1        | 45.05 | -1.76    | -3.760%        | 33.352 | -0.658   | -1.935%        | 49.605 | -0.265   | -0.531%        | 95.593  | -13.026  | -11.992%       |
| snow              | 1        | 44.31 | -2.5     | -5.341%        | 32.024 | -1.986   | -5.839%        | 49.002 | -0.868   | -1.740%        | 92.626  | -15.993  | -14.724%       |
| frost             | 1        | 45.09 | -1.72    | -3.674%        | 33.066 | -0.944   | -2.777%        | 49.519 | -0.351   | -0.704%        | 97.127  | -11.492  | -10.580%       |
| fog               | 1        | 45.58 | -1.23    | -2.628%        | 33.654 | -0.356   | -1.047%        | 49.72  | -0.15    | -0.301%        | 105.238 | -3.381   | -3.113%        |
| brightness        | 1        | 46.71 | -0.1     | -0.214%        | 33.916 | -0.094   | -0.275%        | 49.778 | -0.092   | -0.185%        | 107.028 | -1.591   | -1.465%        |
| spatter           | 1        | 46.48 | -0.33    | -0.705%        | 33.948 | -0.062   | -0.182%        | 49.691 | -0.179   | -0.358%        | 106.63  | -1.989   | -1.831%        |
| saturate          | 1        | 45.19 | -1.62    | -3.461%        | 33.885 | -0.125   | -0.369%        | 49.835 | -0.035   | -0.070%        | 104.711 | -3.908   | -3.598%        |

  

| corruption        | severity | VQA   |          |                | GQA    |          |                | NLVR   |          |                | Caption |          |                |
|-------------------|----------|-------|----------|----------------|--------|----------|----------------|--------|----------|----------------|---------|----------|----------------|
|                   |          | Acc   | Decrease | Decrease Ratio | Acc    | Decrease | Decrease Ratio | Acc    | Decrease | Decrease Ratio | CIDer   | Decrease | Decrease Ratio |
| impulse_noise     | 2        | 45.95 | -0.86    | -1.837%        | 33.384 | -0.626   | -1.842%        | 50.136 | 0.266    | 0.534%         | 98.724  | -9.895   | -9.110%        |
| gaussian_noise    | 2        | 46.04 | -0.77    | -1.645%        | 33.272 | -0.738   | -2.169%        | 49.519 | -0.351   | -0.704%        | 103.07  | -5.549   | -5.109%        |
| shot_noise        | 2        | 46.07 | -0.74    | -1.581%        | 33.797 | -0.213   | -0.626%        | 49.447 | -0.423   | -0.847%        | 101.997 | -6.622   | -6.097%        |
| speckle_noise     | 2        | 46.05 | -0.76    | -1.624%        | 33.447 | -0.563   | -1.655%        | 50.222 | 0.352    | 0.707%         | 103.729 | -4.89    | -4.502%        |
| zoom_blur         | 2        | 42.48 | -4.33    | -9.250%        | 31.428 | -2.582   | -7.592%        | 50.151 | 0.281    | 0.563%         | 69.602  | -39.017  | -35.921%       |
| defocus_blur      | 2        | 46.14 | -0.67    | -1.431%        | 33.702 | -0.308   | -0.906%        | 49.677 | -0.193   | -0.387%        | 102.379 | -6.24    | -5.745%        |
| motion_blur       | 2        | 45.88 | -0.93    | -1.987%        | 33.646 | -0.364   | -1.070%        | 49.577 | -0.293   | -0.588%        | 101.882 | -6.737   | -6.202%        |
| glass_blur        | 2        | 45.97 | -0.84    | -1.794%        | 33.415 | -0.595   | -1.748%        | 49.548 | -0.322   | -0.646%        | 100.838 | -7.781   | -7.163%        |
| gaussian_blur     | 2        | 46.4  | -0.41    | -0.876%        | 33.853 | -0.157   | -0.462%        | 49.734 | -0.136   | -0.272%        | 104.219 | -4.4     | -4.051%        |
| jpeg_compression  | 2        | 46.32 | -0.49    | -1.047%        | 33.638 | -0.372   | -1.094%        | 49.648 | -0.222   | -0.444%        | 105.041 | -3.578   | -3.294%        |
| contrast          | 2        | 45.57 | -1.24    | -2.649%        | 33.678 | -0.332   | -0.977%        | 49.49  | -0.38    | -0.761%        | 103.092 | -5.527   | -5.088%        |
| elastic_transform | 2        | 45.44 | -1.37    | -2.927%        | 33.074 | -0.936   | -2.753%        | 49.376 | -0.494   | -0.991%        | 91.795  | -16.824  | -15.489%       |
| pixelate          | 2        | 44.8  | -2.01    | -4.294%        | 33.097 | -0.913   | -2.683%        | 49.821 | -0.049   | -0.099%        | 92.838  | -15.781  | -14.529%       |
| snow              | 2        | 42.63 | -4.18    | -8.930%        | 31.356 | -2.654   | -7.803%        | 49.476 | -0.394   | -0.790%        | 81.032  | -27.587  | -25.398%       |
| frost             | 2        | 43.16 | -3.65    | -7.797%        | 31.857 | -2.153   | -6.330%        | 49.462 | -0.408   | -0.819%        | 85.069  | -23.55   | -21.681%       |
| fog               | 2        | 45.47 | -1.34    | -2.863%        | 33.614 | -0.396   | -1.164%        | 49.993 | 0.123    | 0.246%         | 103.199 | -5.42    | -4.990%        |
| brightness        | 2        | 46.37 | -0.44    | -0.940%        | 33.662 | -0.348   | -1.023%        | 49.806 | -0.064   | -0.128%        | 107.112 | -1.507   | -1.388%        |
| spatter           | 2        | 44.82 | -1.99    | -4.251%        | 32.779 | -1.231   | -3.618%        | 49.993 | 0.123    | 0.246%         | 96.582  | -12.037  | -11.081%       |
| saturate          | 2        | 44.08 | -2.73    | -5.832%        | 33.614 | -0.396   | -1.164%        | 49.333 | -0.537   | -1.078%        | 99.905  | -8.714   | -8.022%        |

  

| corruption        | severity | VQA   |          |                | GQA    |          |                | NLVR   |          |                | Caption |          |                |
|-------------------|----------|-------|----------|----------------|--------|----------|----------------|--------|----------|----------------|---------|----------|----------------|
|                   |          | Acc   | Decrease | Decrease Ratio | Acc    | Decrease | Decrease Ratio | Acc    | Decrease | Decrease Ratio | CIDer   | Decrease | Decrease Ratio |
| impulse_noise     | 3        | 45.26 | -1.55    | -3.311%        | 33.336 | -0.674   | -1.982%        | 49.476 | -0.394   | -0.790%        | 96.802  | -11.817  | -10.880%       |
| gaussian_noise    | 3        | 45.52 | -1.29    | -2.756%        | 33.177 | -0.833   | -2.449%        | 49.318 | -0.552   | -1.106%        | 97.223  | -11.396  | -10.492%       |
| shot_noise        | 3        | 45.44 | -1.37    | -2.927%        | 33.296 | -0.714   | -2.099%        | 49.462 | -0.408   | -0.819%        | 97.707  | -10.912  | -10.046%       |
| speckle_noise     | 3        | 45.44 | -1.37    | -2.927%        | 33.312 | -0.698   | -2.052%        | 49.562 | -0.308   | -0.617%        | 97.664  | -10.955  | -10.085%       |
| zoom_blur         | 3        | 40.93 | -5.88    | -12.561%       | 30.418 | -3.592   | -10.561%       | 50.395 | 0.525    | 1.052%         | 55.459  | -50.16   | -46.180%       |
| defocus_blur      | 3        | 45.46 | -1.35    | -2.884%        | 33.145 | -0.865   | -2.543%        | 49.691 | -0.179   | -0.358%        | 96.366  | -12.253  | -11.280%       |
| motion_blur       | 3        | 45.4  | -1.41    | -3.012%        | 33.384 | -0.626   | -1.842%        | 50.065 | 0.195    | 0.390%         | 95.118  | -13.501  | -12.430%       |
| glass_blur        | 3        | 43.62 | -3.19    | -6.815%        | 31.277 | -2.733   | -8.036%        | 49.49  | -0.38    | -0.761%        | 80.695  | -27.924  | -25.708%       |
| gaussian_blur     | 3        | 45.47 | -1.34    | -2.863%        | 33.137 | -0.873   | -2.566%        | 49.677 | -0.193   | -0.387%        | 98.701  | -9.918   | -9.131%        |
| jpeg_compression  | 3        | 46.16 | -0.65    | -1.389%        | 33.916 | -0.094   | -0.275%        | 50.022 | 0.152    | 0.304%         | 104.927 | -3.692   | -3.399%        |
| contrast          | 3        | 44.92 | -1.89    | -4.038%        | 33.296 | -0.714   | -2.099%        | 49.246 | -0.624   | -1.250%        | 99.132  | -9.487   | -8.735%        |
| elastic_transform | 3        | 46.1  | -0.71    | -1.517%        | 33.058 | -0.952   | -2.800%        | 49.749 | -0.121   | -0.243%        | 101.1   | -7.519   | -6.923%        |
| pixelate          | 3        | 43.82 | -2.99    | -6.388%        | 32.183 | -1.827   | -5.371%        | 50.122 | 0.252    | 0.505%         | 83.466  | -25.153  | -23.157%       |
| snow              | 3        | 41.46 | -5.35    | -11.429%       | 31.038 | -2.972   | -8.738%        | 49.404 | -0.466   | -0.934%        | 73.038  | -35.581  | -32.758%       |
| frost             | 3        | 41.92 | -4.89    | -10.446%       | 30.967 | -3.043   | -8.948%        | 49.002 | -0.868   | -1.740%        | 76.414  | -32.205  | -29.650%       |
| fog               | 3        | 44.98 | -1.83    | -3.909%        | 33.67  | -0.34    | -1.000%        | 49.605 | -0.265   | -0.531%        | 99.254  | -9.365   | -8.622%        |
| brightness        | 3        | 46.04 | -0.77    | -1.645%        | 33.439 | -0.571   | -1.678%        | 49.763 | -0.107   | -0.214%        | 104.445 | -4.174   | -3.843%        |
| spatter           | 3        | 44.12 | -2.69    | -5.747%        | 32.128 | -1.882   | -5.535%        | 49.993 | 0.123    | 0.246%         | 90.0    | -18.619  | -17.141%       |
| saturate          | 3        | 46.7  | -0.11    | -0.235%        | 33.574 | -0.436   | -1.281%        | 49.62  | -0.25    | -0.502%        | 106.655 | -1.964   | -1.808%        |

  

| corruption        | severity | VQA   |          |                | GQA    |          |                | NLVR   |          |                | Caption |          |                |
|-------------------|----------|-------|----------|----------------|--------|----------|----------------|--------|----------|----------------|---------|----------|----------------|
|                   |          | Acc   | Decrease | Decrease Ratio | Acc    | Decrease | Decrease Ratio | Acc    | Decrease | Decrease Ratio | CIDer   | Decrease | Decrease Ratio |
| impulse_noise     | 4        | 44.38 | -2.43    | -5.191%        | 32.43  | -1.58    | -4.647%        | 49.591 | -0.279   | -0.560%        | 88.377  | -20.242  | -18.635%       |
| gaussian_noise    | 4        | 44.46 | -2.35    | -5.020%        | 32.636 | -1.374   | -4.039%        | 49.548 | -0.322   | -0.646%        | 88.193  | -20.426  | -18.806%       |
| shot_noise        | 4        | 44.43 | -2.38    | -5.084%        | 32.923 | -1.087   | -3.197%        | 49.605 | -0.265   | -0.531%        | 87.759  | -20.86   | -19.205%       |
| speckle_noise     | 4        | 44.84 | -1.97    | -4.209%        | 33.097 | -0.913   | -2.683%        | 49.361 | -0.509   | -1.020%        | 93.592  | -15.027  | -13.835%       |
| zoom_blur         | 4        | 40.16 | -6.65    | -14.206%       | 29.456 | -4.554   | -13.390%       | 50.237 | 0.367    | 0.736%         | 50.053  | -58.566  | -53.919%       |
| defocus_blur      | 4        | 44.81 | -2.0     | -4.273%        | 32.748 | -1.262   | -3.712%        | 49.189 | -0.681   | -1.365%        | 89.136  | -19.483  | -17.937%       |
| motion_blur       | 4        | 44.24 | -2.57    | -5.490%        | 32.191 | -1.819   | -5.348%        | 49.706 | -0.164   | -0.329%        | 83.128  | -25.491  | -23.469%       |
| glass_blur        | 4        | 42.91 | -3.9     | -8.332%        | 31.134 | -2.876   | -8.457%        | 49.534 | -0.336   | -0.675%        | 72.382  | -36.237  | -33.62%        |
| gaussian_blur     | 4        | 44.77 | -2.04    | -4.358%        | 32.605 | -1.405   | -4.132%        | 49.117 | -0.753   | -1.509%        | 91.353  | -17.266  | -15.896%       |
| jpeg_compression  | 4        | 45.62 | -1.19    | -2.542%        | 33.726 | -0.284   | -0.836%        | 49.447 | -0.423   | -0.847%        | 99.898  | -8.721   | -8.029%        |
| contrast          | 4        | 42.91 | -3.9     | -8.332%        | 32.287 | -1.723   | -5.068%        | 49.002 | -0.868   | -1.740%        | 85.581  | -23.038  | -21.210%       |
| elastic_transform | 4        | 45.26 | -1.55    | -3.311%        | 32.438 | -1.572   | -4.623%        | 49.935 | 0.065    | 0.131%         | 93.178  | -15.441  | -14.216%       |
| pixelate          | 4        | 42.26 | -4.55    | -9.720%        | 30.967 | -3.043   | -8.948%        | 49.648 | -0.222   | -0.444%        | 66.914  | -41.705  | -38.396%       |
| snow              | 4        | 39.9  | -6.91    | -14.762%       | 29.862 | -4.148   | -12.197%       | 49.06  | -0.81    | -1.625%        | 58.747  | -49.872  | -45.915%       |
| frost             | 4        | 41.63 | -5.18    | -11.066%       | 31.094 | -2.916   | -8.574%        | 49.376 | -0.494   | -0.991%        | 72.558  | -36.061  | -33.200%       |
| fog               | 4        | 44.03 | -2.78    | -5.939%        | 32.652 | -1.358   | -3.992%        | 49.663 | -0.207   | -0.416%        | 94.25   | -14.369  | -13.229%       |
| brightness        | 4        | 45.6  | -1.21    | -2.585%        | 33.392 | -0.618   | -1.818%        | 49.361 | -0.509   | -1.020%        | 103.259 | -5.36    | -4.935%        |
| spatter           | 4        | 43.61 | -3.2     | -6.836%        | 31.794 | -2.216   | -6.517%        | 49.175 | -0.695   | -1.394%        | 81.102  | -27.517  | -25.333%       |
| saturate          | 4        | 45.23 | -1.58    | -3.375%        | 32.891 | -1.119   | -3.291%        | 49.993 | 0.123    | 0.246%         | 100.906 | -7.713   | -7.101%        |

  

| corruption     | severity | VQA   |          |                | GQA    |          |                | NLVR   |          |                | Caption |          |                |
|----------------|----------|-------|----------|----------------|--------|----------|----------------|--------|----------|----------------|---------|----------|----------------|
|                |          | Acc   | Decrease | Decrease Ratio | Acc    | Decrease | Decrease Ratio | Acc    | Decrease | Decrease Ratio | CIDer   | Decrease | Decrease Ratio |
| impulse_noise  | 5        | 42.83 | -3.98    | -8.502%        | 31.11  | -2.9     | -8.527%        | 49.333 | -0.537   | -1.078%        | 75.508  | -33.111  | -30.483%       |
| gaussian_noise | 5        | 42.85 | -3.96    | -8.460%        | 31.42  | -2.59    | -7.616%        | 49.132 | -0.738   | -1.481%        | 74.45   | -34.169  | -31.458%       |
| shot_noise     | 5        | 42.99 | -3.82    | -8.161%        | 31.937 | -2.073   | -6.096%        | 49.189 | -0.681   | -1.365%        | 78.38   | -30.239  | -27.840%       |
| speckle_noise  | 5        | 44.01 | -2.8     | -5.982%        | 32.708 | -1.302   | -3.829%        | 49.433 | -0.437   | -0.876%        | 87.429  | -21.19   | -19.50         |

Table 14: Performance and decrease ratio of Single Adapter on CLIP-BART against image corruptions given severity 1 to 5.

| corruption        | severity | VQA   |          |                | GQA    |          |                | NLVR   |          |                | Caption |          |                |
|-------------------|----------|-------|----------|----------------|--------|----------|----------------|--------|----------|----------------|---------|----------|----------------|
|                   |          | Acc   | Decrease | Decrease Ratio | Acc    | Decrease | Decrease Ratio | Acc    | Decrease | Decrease Ratio | CIDer   | Decrease | Decrease Ratio |
| impulse_noise     | 1        | 64.03 | -1.32    | -2.020%        | 48.863 | -5.277   | -9.747%        | 73.26  | -0.63    | -0.853%        | 109.007 | -6.031   | -5.242%        |
| gaussian_noise    | 1        | 64.88 | -0.47    | -0.719%        | 49.873 | -4.267   | -7.882%        | 73.446 | -0.444   | -0.601%        | 111.841 | -3.197   | -2.779%        |
| shot_noise        | 1        | 64.99 | -0.36    | -0.551%        | 49.785 | -4.355   | -8.043%        | 73.389 | -0.501   | -0.678%        | 112.405 | -2.633   | -2.288%        |
| speckle_noise     | 1        | 64.87 | -0.48    | -0.735%        | 49.587 | -4.553   | -8.410%        | 73.618 | -0.272   | -0.367%        | 112.232 | -2.806   | -2.440%        |
| zoom_blur         | 1        | 59.13 | -6.22    | -9.518%        | 46.621 | -7.519   | -13.888%       | 57.155 | -16.735  | -22.648%       | 87.848  | -27.19   | -23.635%       |
| defocus_blur      | 1        | 64.89 | -0.46    | -0.704%        | 49.833 | -4.307   | -7.955%        | 73.963 | 0.073    | 0.099%         | 111.174 | -3.864   | -3.358%        |
| motion_blur       | 1        | 64.82 | -0.53    | -0.811%        | 49.928 | -4.212   | -7.779%        | 73.662 | -0.228   | -0.309%        | 110.564 | -4.474   | -3.889%        |
| glass_blur        | 1        | 65.07 | -0.28    | -0.428%        | 50.016 | -4.124   | -7.617%        | 74.02  | 0.13     | 0.176%         | 112.183 | -2.855   | -2.482%        |
| gaussian_blur     | 1        | 65.62 | 0.27     | 0.413%         | 50.358 | -3.782   | -6.986%        | 74.236 | 0.346    | 0.468%         | 113.593 | -1.445   | -1.256%        |
| jpeg_compression  | 1        | 65.26 | -0.09    | -0.138%        | 49.809 | -4.331   | -7.999%        | 73.719 | -0.171   | -0.231%        | 112.803 | -2.235   | -1.943%        |
| contrast          | 1        | 64.6  | -0.75    | -1.148%        | 49.777 | -4.363   | -8.058%        | 73.618 | -0.272   | -0.367%        | 111.984 | -3.054   | -2.655%        |
| elastic_transform | 1        | 65.19 | -0.16    | -0.245%        | 49.817 | -4.323   | -7.985%        | 73.59  | -0.3     | -0.406%        | 112.36  | -2.678   | -2.328%        |
| pixelate          | 1        | 62.39 | -2.96    | -4.529%        | 48.474 | -5.666   | -10.466%       | 72.599 | -1.291   | -1.747%        | 102.729 | -12.309  | -10.700%       |
| snow              | 1        | 61.59 | -3.76    | -5.754%        | 48.02  | -6.12    | -11.303%       | 72.068 | -1.822   | -2.465%        | 100.139 | -14.899  | -12.951%       |
| frost             | 1        | 62.54 | -2.81    | -4.300%        | 48.434 | -5.706   | -10.540%       | 72.571 | -1.319   | -1.786%        | 102.884 | -12.154  | -10.565%       |
| fog               | 1        | 64.01 | -1.34    | -2.050%        | 49.936 | -4.204   | -7.764%        | 73.561 | -0.329   | -0.445%        | 110.89  | -4.148   | -3.606%        |
| brightness        | 1        | 65.53 | 0.18     | 0.275%         | 50.135 | -4.005   | -7.397%        | 74.48  | 0.59     | 0.798%         | 113.34  | -1.698   | -1.476%        |
| spatter           | 1        | 65.35 | 0.0      | 0.000%         | 49.889 | -4.251   | -7.852%        | 74.078 | 0.188    | 0.254%         | 112.884 | -2.154   | -1.872%        |
| saturate          | 1        | 63.25 | -2.1     | -3.213%        | 49.316 | -4.824   | -8.910%        | 72.858 | -1.032   | -1.397%        | 111.428 | -3.61    | -3.138%        |

  

| corruption        | severity | VQA   |          |                | GQA    |          |                | NLVR   |          |                | Caption |          |                |
|-------------------|----------|-------|----------|----------------|--------|----------|----------------|--------|----------|----------------|---------|----------|----------------|
|                   |          | Acc   | Decrease | Decrease Ratio | Acc    | Decrease | Decrease Ratio | Acc    | Decrease | Decrease Ratio | CIDer   | Decrease | Decrease Ratio |
| impulse_noise     | 2        | 63.07 | -2.28    | -3.489%        | 48.617 | -5.523   | -10.202%       | 72.025 | -1.865   | -2.524%        | 105.627 | -9.411   | -8.181%        |
| gaussian_noise    | 2        | 64.02 | -1.33    | -2.035%        | 49.428 | -4.712   | -8.704%        | 73.303 | -0.587   | -0.795%        | 109.739 | -5.299   | -4.606%        |
| shot_noise        | 2        | 63.9  | -1.45    | -2.219%        | 49.189 | -4.951   | -9.145%        | 72.858 | -1.032   | -1.397%        | 109.772 | -5.266   | -4.578%        |
| speckle_noise     | 2        | 64.33 | -1.02    | -1.561%        | 49.332 | -4.808   | -8.880%        | 73.044 | -0.846   | -1.144%        | 110.719 | -4.319   | -3.754%        |
| zoom_blur         | 2        | 55.8  | -9.55    | -14.614%       | 44.451 | -9.689   | -17.897%       | 62.523 | -11.367  | -15.383%       | 73.635  | -41.403  | -35.990%       |
| defocus_blur      | 2        | 64.4  | -0.95    | -1.454%        | 49.563 | -4.577   | -8.455%        | 73.432 | -0.458   | -0.620%        | 109.336 | -5.702   | -4.956%        |
| motion_blur       | 2        | 63.69 | -1.66    | -2.540%        | 49.626 | -4.514   | -8.337%        | 73.69  | -0.2     | -0.270%        | 107.598 | -7.44    | -6.468%        |
| glass_blur        | 2        | 63.67 | -1.68    | -2.571%        | 49.269 | -4.871   | -8.998%        | 72.8   | -1.09    | -1.475%        | 108.063 | -6.975   | -6.063%        |
| gaussian_blur     | 2        | 64.58 | -0.77    | -1.178%        | 49.602 | -4.538   | -8.381%        | 74.121 | 0.231    | 0.312%         | 110.353 | -4.685   | -4.072%        |
| jpeg_compression  | 2        | 65.29 | -0.06    | -0.092%        | 49.65  | -4.49    | -8.293%        | 73.217 | -0.673   | -0.911%        | 111.506 | -3.532   | -3.071%        |
| contrast          | 2        | 64.14 | -1.21    | -1.852%        | 49.261 | -4.879   | -9.013%        | 73.561 | -0.329   | -0.445%        | 109.626 | -5.412   | -4.704%        |
| elastic_transform | 2        | 62.25 | -3.1     | -4.744%        | 49.078 | -5.062   | -9.350%        | 70.289 | -3.601   | -4.874%        | 97.775  | -17.263  | -15.006%       |
| pixelate          | 2        | 61.77 | -3.58    | -5.478%        | 47.925 | -6.215   | -11.480%       | 69.169 | -4.721   | -6.389%        | 100.404 | -14.634  | -12.721%       |
| snow              | 2        | 58.49 | -6.86    | -10.497%       | 46.025 | -8.115   | -14.989%       | 69.413 | -4.477   | -6.059%        | 88.321  | -26.717  | -23.225%       |
| frost             | 2        | 59.16 | -6.19    | -9.472%        | 46.08  | -8.06    | -14.886%       | 70.676 | -3.214   | -4.350%        | 91.341  | -23.697  | -20.599%       |
| fog               | 2        | 63.35 | -2.0     | -3.060%        | 49.42  | -4.72    | -8.719%        | 69.729 | -4.161   | -5.632%        | 109.577 | -5.461   | -4.747%        |
| brightness        | 2        | 64.98 | -0.37    | -0.566%        | 50.024 | -4.116   | -7.603%        | 73.862 | -0.028   | -0.037%        | 113.192 | -1.846   | -1.604%        |
| spatter           | 2        | 61.89 | -3.46    | -5.295%        | 48.577 | -5.563   | -10.275%       | 71.824 | -2.066   | -2.796%        | 104.846 | -10.192  | -8.859%        |
| saturate          | 2        | 60.07 | -5.28    | -8.080%        | 48.243 | -5.897   | -10.892%       | 70.848 | -3.042   | -4.117%        | 105.558 | -9.48    | -8.241%        |

  

| corruption        | severity | VQA   |          |                | GQA    |          |                | NLVR   |          |                | Caption |          |                |
|-------------------|----------|-------|----------|----------------|--------|----------|----------------|--------|----------|----------------|---------|----------|----------------|
|                   |          | Acc   | Decrease | Decrease Ratio | Acc    | Decrease | Decrease Ratio | Acc    | Decrease | Decrease Ratio | CIDer   | Decrease | Decrease Ratio |
| impulse_noise     | 3        | 62.07 | -3.28    | -5.019%        | 48.481 | -5.659   | -10.452%       | 71.236 | -2.654   | -3.592%        | 102.932 | -12.106  | -10.524%       |
| gaussian_noise    | 3        | 62.18 | -3.17    | -4.851%        | 48.64  | -5.5     | -10.158%       | 71.308 | -2.582   | -3.495%        | 104.383 | -10.655  | -9.262%        |
| shot_noise        | 3        | 62.39 | -2.96    | -4.529%        | 48.672 | -5.468   | -10.099%       | 71.451 | -2.439   | -3.301%        | 104.749 | -10.289  | -8.944%        |
| speckle_noise     | 3        | 62.82 | -2.53    | -3.871%        | 48.72  | -5.42    | -10.011%       | 72.04  | -1.85    | -2.504%        | 104.894 | -10.144  | -8.818%        |
| zoom_blur         | 3        | 53.05 | -12.3    | -18.822%       | 42.996 | -11.144  | -20.584%       | 59.538 | -14.352  | -19.424%       | 58.638  | -56.4    | -49.028%       |
| defocus_blur      | 3        | 62.42 | -2.93    | -4.484%        | 48.394 | -5.746   | -10.613%       | 71.839 | -2.051   | -2.776%        | 102.714 | -12.324  | -10.713%       |
| motion_blur       | 3        | 61.83 | -3.52    | -5.386%        | 48.792 | -5.348   | -9.879%        | 71.465 | -2.425   | -3.281%        | 101.501 | -13.537  | -11.767%       |
| glass_blur        | 3        | 58.84 | -6.51    | -9.962%        | 45.937 | -8.203   | -15.151%       | 69.786 | -4.104   | -5.554%        | 86.792  | -28.246  | -24.553%       |
| gaussian_blur     | 3        | 63.26 | -2.09    | -3.198%        | 48.704 | -5.436   | -10.040%       | 71.853 | -2.037   | -2.757%        | 105.781 | -9.257   | -8.047%        |
| jpeg_compression  | 3        | 64.83 | -0.52    | -0.796%        | 50.072 | -4.068   | -7.515%        | 73.145 | -0.745   | -1.008%        | 111.081 | -3.957   | -3.440%        |
| contrast          | 3        | 62.8  | -2.55    | -3.902%        | 48.537 | -5.603   | -10.349%       | 71.896 | -1.994   | -2.698%        | 105.345 | -9.693   | -8.426%        |
| elastic_transform | 3        | 63.81 | -1.54    | -2.357%        | 49.292 | -4.848   | -8.954%        | 72.743 | -1.147   | -1.552%        | 107.885 | -7.153   | -6.218%        |
| pixelate          | 3        | 59.32 | -6.03    | -9.227%        | 46.128 | -8.012   | -14.798%       | 67.475 | -6.415   | -8.681%        | 90.111  | -24.927  | -21.669%       |
| snow              | 3        | 56.63 | -8.72    | -13.344%       | 44.069 | -10.071  | -18.602%       | 67.332 | -6.558   | -8.876%        | 81.487  | -33.551  | -29.165%       |
| frost             | 3        | 56.55 | -8.8     | -13.466%       | 44.84  | -9.3     | -17.177%       | 67.891 | -5.999   | -8.118%        | 81.86   | -33.178  | -28.841%       |
| fog               | 3        | 62.17 | -3.18    | -4.866%        | 48.855 | -5.285   | -9.761%        | 72.169 | -1.721   | -2.329%        | 106.133 | -8.905   | -7.741%        |
| brightness        | 3        | 64.41 | -0.94    | -1.438%        | 49.459 | -4.681   | -8.645%        | 72.872 | -1.018   | -1.378%        | 112.042 | -2.996   | -2.605%        |
| spatter           | 3        | 60.9  | -4.45    | -6.809%        | 48.1   | -6.04    | -11.157%       | 70.992 | -2.898   | -3.922%        | 97.078  | -17.96   | -15.612%       |
| saturate          | 3        | 65.18 | -0.17    | -0.260%        | 49.897 | -4.243   | -7.838%        | 74.178 | 0.288    | 0.390%         | 112.3   | -2.738   | -2.380%        |

  

| corruption        | severity | VQA   |          |                | GQA    |          |                | NLVR   |          |                | Caption |          |                |
|-------------------|----------|-------|----------|----------------|--------|----------|----------------|--------|----------|----------------|---------|----------|----------------|
|                   |          | Acc   | Decrease | Decrease Ratio | Acc    | Decrease | Decrease Ratio | Acc    | Decrease | Decrease Ratio | CIDer   | Decrease | Decrease Ratio |
| impulse_noise     | 4        | 59.67 | -5.68    | -8.692%        | 47.615 | -6.525   | -12.052%       | 69.887 | -4.003   | -5.418%        | 93.318  | -21.72   | -18.881%       |
| gaussian_noise    | 4        | 59.55 | -5.8     | -8.875%        | 47.702 | -6.438   | -11.891%       | 69.872 | -4.018   | -5.437%        | 95.42   | -19.618  | -17.054%       |
| shot_noise        | 4        | 59.34 | -6.01    | -9.197%        | 47.424 | -6.716   | -12.405%       | 69.155 | -4.735   | -6.409%        | 93.488  | -21.55   | -18.733%       |
| speckle_noise     | 4        | 61.44 | -3.91    | -5.983%        | 47.822 | -6.318   | -11.670%       | 70.877 | -3.013   | -4.078%        | 100.403 | -14.235  | -12.374%       |
| zoom_blur         | 4        | 50.89 | -14.46   | -22.127%       | 41.207 | -12.933  | -23.888%       | 57.471 | -16.419  | -22.221%       | 48.711  | -66.327  | -57.657%       |
| defocus_blur      | 4        | 60.54 | -4.81    | -7.360%        | 47.472 | -6.668   | -12.317%       | 69.915 | -3.975   | -5.379%        | 95.936  | -19.102  | -16.605%       |
| motion_blur       | 4        | 59.18 | -6.17    | -9.441%        | 47.83  | -6.31    | -11.656%       | 68.681 | -5.209   | -7.050%        | 88.465  | -26.573  | -23.099%       |
| glass_blur        | 4        | 56.77 | -8.58    | -13.129%       | 44.57  | -9.57    | -17.677%       | 68.624 | -5.266   | -7.127%        | 79.597  | -35.441  | -30.808%       |
| gaussian_blur     | 4        | 61.34 | -4.01    | -6.136%        | 47.957 | -6.183   | -11.421%       | 70.504 | -3.386   | -4.583%        | 97.671  | -17.367  | -15.097%       |
| jpeg_compression  | 4        | 63.54 | -1.81    | -2.770%        | 49.118 | -5.022   | -9.277%        | 72.312 | -1.578   | -2.135%        | 107.37  | -7.668   | -6.666%        |
| contrast          | 4        | 58.46 | -6.89    | -10.543%       | 45.929 | -8.211   | -15.165%       | 68.724 | -5.166   | -6.991%        | 91.302  | -23.736  | -20.633%       |
| elastic_transform | 4        | 61.62 | -3.73    | -5.708%        | 47.909 | -6.231   | -11.509%       | 72.011 | -1.879   | -2.543%        | 98.955  | -16.083  | -13.981%       |
| pixelate          | 4        | 55.01 | -10.34   | -15.822%       | 44.284 | -9.856   | -18.205%       | 64.274 | -9.616   | -13.013%       | 73.703  | -41.335  | -35.932%       |
| snow              | 4        | 53.43 | -11.92   | -18.240%       | 42.439 | -11.701  | -21.612%       | 64.877 | -9.013   | -12.197%       | 65.462  | -49.576  | -43.096%       |
| frost             | 4        | 55.81 | -9.54    | -14.598%       | 44.252 | -9.888   | -18.264%       | 68.322 | -5.568   | -7.535%        | 78.427  | -36.611  | -31.825%       |
| fog               | 4        | 60.53 | -4.82    | -7.376%        | 47.647 | -6.493   | -11.994%       | 71.451 | -2.439   | -3.301%        | 100.557 | -14.481  | -12.588%       |
| brightness        | 4        | 63.6  | -1.75    | -2.678%        | 49.213 | -4.927   | -9.101%        | 71.824 | -2.066   | -2.796%        | 108.604 | -6.434   | -5.593%        |
| spatter           | 4        | 58.17 | -7.18    | -10.987%       | 45.492 | -8.648   | -15.973%       | 68.408 | -5.482   | -7.419%        | 87.985  | -27.053  | -23.517%       |
| saturate          | 4        | 62.08 | -3.27    | -5.004%        | 48.092 | -6.048   | -11.171%       | 71.623 | -2.267   | -3.068%        | 107.11  | -7.928   | -6.892%        |

  

| corruption     | severity | VQA   |          |                | GQA    |          |                | NLVR   |          |                | Caption |          |                |
|----------------|----------|-------|----------|----------------|--------|----------|----------------|--------|----------|----------------|---------|----------|----------------|
|                |          | Acc   | Decrease | Decrease Ratio | Acc    | Decrease | Decrease Ratio | Acc    | Decrease | Decrease Ratio | CIDer   | Decrease | Decrease Ratio |
| impulse_noise  | 5        | 55.61 | -9.74    | -14.904%       | 45.031 | -9.109   | -16.825%       | 67.203 | -6.687   | -9.051%        | 80.804  | -34.234  | -29.759%       |
| gaussian_noise | 5        | 55.61 | -9.74    | -14.904%       | 44.864 | -9.276   | -17.133%       | 66.915 | -6.975   | -9.439%        | 79.906  | -35.132  | -30.539%       |
| shot_noise     | 5        | 56.57 | -8.78    | -13.435%       | 45.58  | -8.56    | -15.812%       | 66.743 | -7.147   | -9.672%        | 84.103  | -30.935  | -26.891%       |
| speckle_noise  | 5        | 59.3  | -6.05    | -9.258%        | 47.702 | -6.438   |                |        |          |                |         |          |                |

Table 15: Performance and decrease ratio of Single Compacter on CLIP-BART against image corruptions given severity 1 to 5.

| corruption        | severity | VQA   |          |                | GQA    |          |                | NLVR   |          |                | Caption |          |                |
|-------------------|----------|-------|----------|----------------|--------|----------|----------------|--------|----------|----------------|---------|----------|----------------|
|                   |          | Acc   | Decrease | Decrease Ratio | Acc    | Decrease | Decrease Ratio | Acc    | Decrease | Decrease Ratio | CIDer   | Decrease | Decrease Ratio |
| impulse_noise     | 1        | 62.38 | -2.09    | -3.242%        | 48.012 | -4.888   | -9.239%        | 70.217 | 0.277    | 0.396%         | 108.307 | -4.753   | -4.204%        |
| gaussian_noise    | 1        | 63.45 | -1.02    | -1.582%        | 48.847 | -4.053   | -7.661%        | 69.571 | -0.369   | -0.528%        | 111.056 | -2.004   | -1.772%        |
| shot_noise        | 1        | 63.46 | -1.01    | -1.567%        | 49.269 | -3.631   | -6.865%        | 70.016 | 0.076    | 0.108%         | 111.082 | -1.978   | -1.749%        |
| speckle_noise     | 1        | 63.35 | -1.12    | -1.737%        | 48.736 | -4.164   | -7.872%        | 70.418 | 0.478    | 0.683%         | 111.427 | -1.633   | -1.444%        |
| zoom_blur         | 1        | 57.83 | -6.64    | -10.299%       | 45.19  | -7.71    | -14.575%       | 56.696 | -13.244  | -18.936%       | 87.734  | -25.326  | -22.401%       |
| defocus_blur      | 1        | 63.58 | -0.89    | -1.380%        | 48.513 | -4.387   | -8.292%        | 70.289 | 0.349    | 0.498%         | 110.1   | -2.96    | -2.618%        |
| motion_blur       | 1        | 63.21 | -1.26    | -1.954%        | 48.712 | -4.188   | -7.917%        | 70.03  | 0.09     | 0.129%         | 108.606 | -4.454   | -3.939%        |
| glass_blur        | 1        | 63.63 | -0.84    | -1.303%        | 48.609 | -4.291   | -8.112%        | 70.001 | 0.061    | 0.088%         | 110.944 | -2.116   | -1.871%        |
| gaussian_blur     | 1        | 64.12 | -0.35    | -0.543%        | 49.475 | -3.425   | -6.474%        | 70.102 | 0.162    | 0.231%         | 112.676 | -3.84    | -3.40%         |
| jpeg_compression  | 1        | 63.9  | -0.57    | -0.884%        | 48.609 | -4.291   | -8.112%        | 70.446 | 0.506    | 0.724%         | 111.881 | -1.179   | -1.043%        |
| contrast          | 1        | 63.16 | -1.31    | -2.032%        | 48.784 | -4.116   | -7.781%        | 70.016 | 0.076    | 0.108%         | 111.04  | -2.02    | -1.787%        |
| elastic_transform | 1        | 63.8  | -0.67    | -1.039%        | 48.982 | -3.918   | -7.406%        | 69.829 | -0.111   | -0.158%        | 110.973 | -2.087   | -1.846%        |
| pixelate          | 1        | 61.0  | -3.47    | -5.382%        | 47.122 | -5.778   | -10.923%       | 69.112 | -0.828   | -1.185%        | 101.596 | -11.464  | -10.139%       |
| snow              | 1        | 59.57 | -4.9     | -7.600%        | 46.478 | -6.422   | -12.140%       | 68.652 | -1.288   | -1.841%        | 97.941  | -15.119  | -13.373%       |
| frost             | 1        | 61.21 | -3.26    | -5.057%        | 47.599 | -5.301   | -10.021%       | 68.81  | -1.13    | -1.616%        | 102.993 | -10.067  | -8.904%        |
| fog               | 1        | 62.5  | -1.97    | -3.056%        | 48.458 | -4.442   | -8.398%        | 69.657 | -0.283   | -0.405%        | 110.028 | -3.032   | -2.682%        |
| brightness        | 1        | 64.18 | -0.29    | -0.450%        | 49.269 | -3.631   | -6.865%        | 70.446 | 0.506    | 0.724%         | 112.716 | -0.344   | -0.304%        |
| spatter           | 1        | 63.83 | -0.64    | -0.993%        | 48.935 | -3.965   | -7.496%        | 70.489 | 0.549    | 0.786%         | 112.987 | -0.073   | -0.065%        |
| saturate          | 1        | 61.63 | -2.84    | -4.405%        | 47.989 | -4.911   | -9.284%        | 69.126 | -0.814   | -1.164%        | 110.143 | -2.917   | -2.580%        |

  

| corruption        | severity | VQA   |          |                | GQA    |          |                | NLVR   |          |                | Caption |          |                |
|-------------------|----------|-------|----------|----------------|--------|----------|----------------|--------|----------|----------------|---------|----------|----------------|
|                   |          | Acc   | Decrease | Decrease Ratio | Acc    | Decrease | Decrease Ratio | Acc    | Decrease | Decrease Ratio | CIDer   | Decrease | Decrease Ratio |
| impulse_noise     | 2        | 61.76 | -2.71    | -4.204%        | 47.869 | -5.031   | -9.510%        | 69.011 | -0.929   | -1.328%        | 104.634 | -8.426   | -7.453%        |
| gaussian_noise    | 2        | 62.7  | -1.77    | -2.745%        | 48.41  | -4.49    | -8.488%        | 69.844 | -0.096   | -0.138%        | 108.907 | -4.153   | -3.674%        |
| shot_noise        | 2        | 62.72 | -1.75    | -2.714%        | 48.338 | -4.562   | -8.623%        | 69.499 | -0.441   | -0.630%        | 108.111 | -4.949   | -4.377%        |
| speckle_noise     | 2        | 63.13 | -1.34    | -2.078%        | 48.378 | -4.522   | -8.548%        | 69.585 | -0.355   | -0.507%        | 109.028 | -4.032   | -3.567%        |
| zoom_blur         | 2        | 55.04 | -9.43    | -14.627%       | 43.33  | -9.57    | -18.091%       | 61.992 | -7.948   | -11.364%       | 75.32   | -37.74   | -33.381%       |
| defocus_blur      | 2        | 62.91 | -1.56    | -2.420%        | 48.577 | -4.323   | -8.172%        | 69.686 | -0.254   | -0.364%        | 108.118 | -4.942   | -4.371%        |
| motion_blur       | 2        | 62.52 | -1.95    | -3.025%        | 48.092 | -4.808   | -9.909%        | 69.528 | -0.412   | -0.589%        | 106.139 | -6.921   | -6.121%        |
| glass_blur        | 2        | 62.21 | -2.26    | -3.506%        | 48.187 | -4.713   | -8.909%        | 68.753 | -1.187   | -1.698%        | 105.509 | -7.551   | -6.679%        |
| gaussian_blur     | 2        | 63.1  | -1.37    | -2.125%        | 48.648 | -4.252   | -8.037%        | 69.973 | 0.033    | 0.047%         | 108.869 | -4.191   | -3.707%        |
| jpeg_compression  | 2        | 63.78 | -0.69    | -1.070%        | 48.513 | -4.387   | -8.292%        | 70.518 | 0.578    | 0.827%         | 111.731 | -1.329   | -1.175%        |
| contrast          | 2        | 62.46 | -2.01    | -3.118%        | 48.243 | -4.657   | -8.803%        | 69.47  | -0.47    | -0.671%        | 108.788 | -4.272   | -3.778%        |
| elastic_transform | 2        | 60.91 | -3.56    | -5.522%        | 47.44  | -5.46    | -10.321%       | 66.758 | -3.182   | -4.550%        | 97.209  | -15.851  | -14.020%       |
| pixelate          | 2        | 60.54 | -3.93    | -6.096%        | 46.923 | -5.977   | -11.298%       | 66.887 | -3.053   | -4.366%        | 99.414  | -13.646  | -12.069%       |
| snow              | 2        | 57.03 | -7.44    | -11.540%       | 44.387 | -8.513   | -16.093%       | 67.131 | -2.809   | -4.017%        | 87.136  | -25.924  | -22.929%       |
| frost             | 2        | 57.88 | -6.59    | -10.222%       | 45.556 | -7.344   | -13.883%       | 67.475 | -2.465   | -3.524%        | 90.786  | -22.274  | -19.701%       |
| fog               | 2        | 61.88 | -2.59    | -4.017%        | 48.084 | -4.816   | -9.104%        | 66.169 | -3.771   | -5.392%        | 109.011 | -4.049   | -3.582%        |
| brightness        | 2        | 63.68 | -0.79    | -1.225%        | 48.807 | -4.093   | -7.736%        | 70.059 | 0.119    | 0.170%         | 111.73  | -1.33    | -1.177%        |
| spatter           | 2        | 60.59 | -3.88    | -6.018%        | 47.392 | -5.508   | -10.412%       | 69.312 | -0.628   | -0.897%        | 103.723 | -9.337   | -8.259%        |
| saturate          | 2        | 58.7  | -5.77    | -8.950%        | 47.098 | -5.802   | -10.968%       | 67.289 | -2.651   | -3.791%        | 105.315 | -7.745   | -6.851%        |

  

| corruption        | severity | VQA   |          |                | GQA    |          |                | NLVR   |          |                | Caption |          |                |
|-------------------|----------|-------|----------|----------------|--------|----------|----------------|--------|----------|----------------|---------|----------|----------------|
|                   |          | Acc   | Decrease | Decrease Ratio | Acc    | Decrease | Decrease Ratio | Acc    | Decrease | Decrease Ratio | CIDer   | Decrease | Decrease Ratio |
| impulse_noise     | 3        | 60.71 | -3.76    | -5.832%        | 47.353 | -5.547   | -10.487%       | 68.48  | -1.46    | -2.088%        | 102.629 | -10.431  | -9.226%        |
| gaussian_noise    | 3        | 60.94 | -3.53    | -5.475%        | 47.694 | -5.206   | -9.840%        | 68.882 | -1.058   | -1.513%        | 103.945 | -9.115   | -8.062%        |
| shot_noise        | 3        | 60.91 | -3.56    | -5.522%        | 47.957 | -4.943   | -9.345%        | 68.566 | -1.374   | -1.964%        | 104.135 | -8.925   | -7.894%        |
| speckle_noise     | 3        | 61.16 | -3.31    | -5.134%        | 47.965 | -4.935   | -9.329%        | 68.394 | -1.546   | -2.211%        | 104.032 | -9.028   | -7.985%        |
| zoom_blur         | 3        | 52.61 | -11.86   | -18.396%       | 42.05  | -10.85   | -20.511%       | 59.294 | -10.646  | -15.222%       | 61.902  | -51.158  | -45.249%       |
| defocus_blur      | 3        | 60.95 | -3.52    | -5.460%        | 47.122 | -5.778   | -10.923%       | 69.068 | -0.872   | -1.246%        | 102.474 | -10.586  | -9.363%        |
| motion_blur       | 3        | 60.58 | -3.89    | -6.034%        | 47.201 | -5.699   | -10.772%       | 68.48  | -1.46    | -2.088%        | 99.581  | -13.479  | -11.922%       |
| glass_blur        | 3        | 57.24 | -7.23    | -11.215%       | 44.236 | -8.664   | -16.378%       | 67.647 | -2.293   | -3.278%        | 86.811  | -26.249  | -23.217%       |
| gaussian_blur     | 3        | 61.63 | -2.84    | -4.405%        | 47.822 | -5.078   | -9.600%        | 69.47  | -0.47    | -0.671%        | 105.023 | -8.037   | -7.108%        |
| jpeg_compression  | 3        | 63.28 | -1.19    | -1.846%        | 48.601 | -4.299   | -8.127%        | 70.245 | 0.305    | 0.437%         | 110.761 | -2.299   | -2.034%        |
| contrast          | 3        | 61.11 | -3.36    | -5.212%        | 47.209 | -5.691   | -10.757%       | 68.308 | -1.632   | -2.334%        | 104.222 | -8.838   | -7.817%        |
| elastic_transform | 3        | 62.47 | -2.0     | -3.102%        | 47.806 | -5.094   | -9.630%        | 69.628 | -0.312   | -0.446%        | 105.382 | -7.678   | -6.791%        |
| pixelate          | 3        | 57.98 | -6.49    | -10.067%       | 45.277 | -7.623   | -14.409%       | 65.853 | -4.087   | -5.843%        | 89.552  | -23.508  | -20.793%       |
| snow              | 3        | 55.24 | -9.23    | -14.317%       | 43.568 | -9.332   | -17.641%       | 65.767 | -4.173   | -5.966%        | 79.518  | -33.542  | -29.668%       |
| frost             | 3        | 55.67 | -8.8     | -13.650%       | 44.021 | -8.879   | -16.784%       | 66.226 | -3.714   | -5.310%        | 82.75   | -30.31   | -26.809%       |
| fog               | 3        | 60.67 | -3.8     | -5.894%        | 47.655 | -5.245   | -9.916%        | 68.638 | -1.302   | -1.862%        | 105.889 | -7.171   | -6.343%        |
| brightness        | 3        | 62.85 | -1.62    | -2.513%        | 48.148 | -4.752   | -8.984%        | 69.571 | -0.369   | -0.528%        | 110.337 | -2.723   | -2.409%        |
| spatter           | 3        | 59.42 | -5.05    | -7.833%        | 46.788 | -6.112   | -11.554%       | 68.595 | -1.345   | -1.923%        | 95.991  | -17.069  | -15.097%       |
| saturate          | 3        | 63.54 | -0.93    | -1.443%        | 48.315 | -4.585   | -8.668%        | 70.576 | 0.636    | 0.909%         | 111.529 | -1.531   | -1.354%        |

  

| corruption        | severity | VQA   |          |                | GQA    |          |                | NLVR   |          |                | Caption |          |                |
|-------------------|----------|-------|----------|----------------|--------|----------|----------------|--------|----------|----------------|---------|----------|----------------|
|                   |          | Acc   | Decrease | Decrease Ratio | Acc    | Decrease | Decrease Ratio | Acc    | Decrease | Decrease Ratio | CIDer   | Decrease | Decrease Ratio |
| impulse_noise     | 4        | 58.47 | -6.0     | -9.307%        | 46.398 | -6.502   | -12.290%       | 67.547 | -2.393   | -3.421%        | 94.706  | -18.354  | -16.234%       |
| gaussian_noise    | 4        | 58.56 | -5.91    | -9.167%        | 46.836 | -6.064   | -11.464%       | 67.36  | -2.58    | -3.688%        | 95.277  | -17.783  | -15.729%       |
| shot_noise        | 4        | 58.29 | -6.18    | -9.586%        | 46.2   | -6.7     | -12.666%       | 66.657 | -3.283   | -4.694%        | 93.333  | -19.727  | -17.448%       |
| speckle_noise     | 4        | 59.92 | -4.55    | -7.058%        | 46.939 | -5.961   | -11.268%       | 67.418 | -2.522   | -3.606%        | 99.83   | -13.23   | -11.702%       |
| zoom_blur         | 4        | 50.66 | -13.81   | -21.421%       | 40.189 | -12.711  | -24.028%       | 56.897 | -13.043  | -18.649%       | 52.847  | -60.213  | -53.258%       |
| defocus_blur      | 4        | 59.47 | -5.0     | -7.756%        | 46.375 | -6.525   | -12.335%       | 67.891 | -2.049   | -2.929%        | 94.513  | -18.547  | -16.404%       |
| motion_blur       | 4        | 58.07 | -6.4     | -9.927%        | 45.858 | -7.042   | -13.312%       | 67.03  | -2.91    | -4.160%        | 87.978  | -25.082  | -22.185%       |
| glass_blur        | 4        | 55.51 | -8.96    | -13.898%       | 43.043 | -9.857   | -18.632%       | 66.241 | -3.699   | -5.289%        | 79.572  | -33.488  | -29.619%       |
| gaussian_blur     | 4        | 59.98 | -4.49    | -6.964%        | 46.526 | -6.374   | -12.050%       | 68.279 | -1.661   | -2.375%        | 98.277  | -14.783  | -13.075%       |
| jpeg_compression  | 4        | 62.43 | -2.04    | -3.164%        | 47.607 | -5.293   | -10.006%       | 69.686 | -0.254   | -0.364%        | 109.345 | -5.715   | -5.054%        |
| contrast          | 4        | 57.42 | -7.05    | -10.935%       | 45.134 | -7.766   | -14.680%       | 65.25  | -4.69    | -6.705%        | 91.25   | -21.81   | -19.290%       |
| elastic_transform | 4        | 60.54 | -3.93    | -6.096%        | 46.605 | -6.295   | -11.899%       | 69.169 | -0.771   | -1.102%        | 99.043  | -14.017  | -12.398%       |
| pixelate          | 4        | 54.08 | -10.39   | -16.116%       | 43.123 | -9.777   | -18.482%       | 61.605 | -8.335   | -11.918%       | 73.492  | -39.568  | -34.997%       |
| snow              | 4        | 51.91 | -12.56   | -19.482%       | 41.437 | -11.463  | -21.668%       | 63.169 | -6.771   | -9.681%        | 64.718  | -48.342  | -42.758%       |
| frost             | 4        | 54.35 | -10.12   | -15.697%       | 43.187 | -9.713   | -18.362%       | 66.313 | -3.627   | -5.186%        | 78.315  | -34.745  | -30.732%       |
| fog               | 4        | 59.13 | -5.34    | -8.283%        | 46.327 | -6.573   | -12.425%       | 67.963 | -1.977   | -2.826%        | 100.583 | -12.477  | -11.036%       |
| brightness        | 4        | 62.02 | -2.45    | -3.800%        | 47.678 | -5.222   | -9.871%        | 68.724 | -1.216   | -1.739%        | 107.612 | -5.448   | -4.819%        |
| spatter           | 4        | 56.94 | -7.53    | -11.680%       | 44.745 | -8.155   | -15.416%       | 66.341 | -3.599   | -5.145%        | 86.484  | -26.576  | -23.506%       |
| saturate          | 4        | 60.69 | -3.78    | -5.863%        | 46.868 | -6.032   | -11.404%       | 68.71  | -1.23    | -1.759%        | 105.87  | -7.19    | -6.360%        |

  

| corruption     | severity | VQA   |          |                | GQA    |          |                | NLVR   |          |                | Caption |          |                |
|----------------|----------|-------|----------|----------------|--------|----------|----------------|--------|----------|----------------|---------|----------|----------------|
|                |          | Acc   | Decrease | Decrease Ratio | Acc    | Decrease | Decrease Ratio | Acc    | Decrease | Decrease Ratio | CIDer   | Decrease | Decrease Ratio |
| impulse_noise  | 5        | 54.78 | -9.69    | -15.030%       | 44.371 | -8.529   | -16.123%       | 65.25  | -4.69    | -6.705%        | 81.779  | -31.281  | -27.668%       |
| gaussian_noise | 5        | 54.69 | -9.78    | -15.170%       | 44.403 | -8.497   | -16.063%       | 65.279 | -4.661   | -6.664%        | 80.075  | -32.985  | -29.175%       |
| shot_noise     | 5        | 55.68 | -8.79    | -13.634%       | 44.864 | -8.036   | -15.191%       | 64.748 | -5.192   | -7.423%        | 83.994  | -29.066  | -25.709%       |
| speckle_noise  | 5        | 58.11 | -6.36    | -9.865%        | 46.088 | -6.812   | -12.           |        |          |                |         |          |                |

Table 16: Performance and decrease ratio of Single LoRA on CLIP-BART against image corruptions given severity 1 to 5.

| corruption        | severity | VQA   |          |                | GQA    |          |                | NLVR   |          |                | Caption |          |                |
|-------------------|----------|-------|----------|----------------|--------|----------|----------------|--------|----------|----------------|---------|----------|----------------|
|                   |          | Acc   | Decrease | Decrease Ratio | Acc    | Decrease | Decrease Ratio | Acc    | Decrease | Decrease Ratio | CIDer   | Decrease | Decrease Ratio |
| impulse_noise     | 1        | 63.06 | -2.28    | -3.489%        | 48.036 | -5.154   | -9.689%        | 72.614 | -0.966   | -1.313%        | 108.958 | -5.585   | -4.876%        |
| gaussian_noise    | 1        | 63.9  | -1.44    | -2.204%        | 48.179 | -5.011   | -9.420%        | 72.987 | -0.593   | -0.806%        | 111.859 | -2.684   | -2.343%        |
| shot_noise        | 1        | 63.9  | -1.44    | -2.204%        | 48.712 | -4.478   | -8.419%        | 72.93  | -0.65    | -0.884%        | 111.362 | -4.877   | -4.377%        |
| speckle_noise     | 1        | 63.97 | -1.37    | -2.097%        | 48.752 | -4.438   | -8.344%        | 72.671 | -0.909   | -1.235%        | 111.538 | -3.005   | -2.623%        |
| zoom_blur         | 1        | 58.19 | -7.15    | -10.943%       | 45.429 | -7.761   | -14.592%       | 58.677 | -14.903  | -20.255%       | 86.603  | -27.94   | -24.393%       |
| defocus_blur      | 1        | 64.07 | -1.27    | -1.944%        | 48.879 | -4.311   | -8.105%        | 73.016 | -0.564   | -0.767%        | 111.315 | -3.228   | -2.819%        |
| motion_blur       | 1        | 64.08 | -1.26    | -1.928%        | 48.283 | -4.907   | -9.226%        | 73.403 | -0.177   | -0.240%        | 109.757 | -4.786   | -4.178%        |
| glass_blur        | 1        | 64.07 | -1.27    | -1.944%        | 48.736 | -4.454   | -8.374%        | 73.371 | -0.263   | -0.357%        | 110.711 | -3.832   | -3.345%        |
| gaussian_blur     | 1        | 64.78 | -0.56    | -0.857%        | 49.173 | -4.017   | -7.552%        | 73.791 | 0.211    | 0.286%         | 113.37  | -1.173   | -1.024%        |
| jpeg_compression  | 1        | 64.52 | -0.82    | -1.255%        | 49.086 | -4.104   | -7.716%        | 72.872 | -0.708   | -0.962%        | 112.734 | -1.809   | -1.579%        |
| contrast          | 1        | 63.72 | -1.62    | -2.479%        | 48.696 | -4.494   | -8.449%        | 73.001 | -0.579   | -0.787%        | 111.418 | -3.125   | -2.729%        |
| elastic_transform | 1        | 64.49 | -0.85    | -1.301%        | 49.181 | -4.009   | -7.537%        | 72.442 | -1.138   | -1.547%        | 111.973 | -2.57    | -2.244%        |
| pixelate          | 1        | 61.14 | -4.2     | -6.428%        | 47.265 | -5.925   | -11.139%       | 71.48  | -2.1     | -2.854%        | 102.811 | -11.732  | -10.242%       |
| snow              | 1        | 60.18 | -5.16    | -7.897%        | 46.701 | -6.489   | -12.200%       | 71.236 | -2.344   | -3.186%        | 99.386  | -15.157  | -13.233%       |
| frost             | 1        | 61.78 | -3.56    | -5.448%        | 47.392 | -5.798   | -10.900%       | 71.379 | -2.201   | -2.991%        | 102.864 | -11.679  | -10.196%       |
| fog               | 1        | 63.1  | -2.24    | -3.428%        | 48.402 | -4.788   | -9.902%        | 72.398 | -1.182   | -1.606%        | 110.773 | -3.77    | -3.291%        |
| brightness        | 1        | 64.85 | -0.49    | -0.750%        | 49.237 | -3.953   | -7.432%        | 73.504 | -0.076   | -0.104%        | 113.739 | -0.804   | -0.702%        |
| spatter           | 1        | 64.45 | -0.89    | -1.362%        | 49.284 | -3.906   | -7.343%        | 73.432 | -0.148   | -0.201%        | 112.657 | -1.886   | -1.647%        |
| saturate          | 1        | 62.13 | -3.21    | -4.913%        | 47.909 | -5.281   | -9.928%        | 71.609 | -1.971   | -2.679%        | 110.161 | -4.382   | -3.826%        |

  

| corruption        | severity | VQA   |          |                | GQA    |          |                | NLVR   |          |                | Caption |          |                |
|-------------------|----------|-------|----------|----------------|--------|----------|----------------|--------|----------|----------------|---------|----------|----------------|
|                   |          | Acc   | Decrease | Decrease Ratio | Acc    | Decrease | Decrease Ratio | Acc    | Decrease | Decrease Ratio | CIDer   | Decrease | Decrease Ratio |
| impulse_noise     | 2        | 62.1  | -3.24    | -4.959%        | 47.957 | -5.233   | -9.839%        | 72.025 | -1.555   | -2.113%        | 105.736 | -8.807   | -7.689%        |
| gaussian_noise    | 2        | 63.05 | -2.29    | -3.505%        | 47.758 | -5.432   | -10.212%       | 72.169 | -1.411   | -1.918%        | 109.572 | -4.971   | -4.340%        |
| shot_noise        | 2        | 62.87 | -2.47    | -3.780%        | 47.845 | -5.345   | -10.048%       | 72.47  | -1.11    | -1.508%        | 108.551 | -5.992   | -5.231%        |
| speckle_noise     | 2        | 63.46 | -1.88    | -2.877%        | 48.307 | -4.883   | -9.181%        | 72.298 | -1.282   | -1.742%        | 109.917 | -4.626   | -4.039%        |
| zoom_blur         | 2        | 55.27 | -10.07   | -15.412%       | 44.196 | -8.994   | -16.909%       | 63.212 | -10.368  | -14.090%       | 73.46   | -41.083  | -35.867%       |
| defocus_blur      | 2        | 63.3  | -2.04    | -3.122%        | 48.728 | -4.462   | -8.389%        | 72.226 | -1.354   | -1.840%        | 109.109 | -5.434   | -4.744%        |
| motion_blur       | 2        | 62.82 | -2.52    | -3.857%        | 48.012 | -5.178   | -9.734%        | 72.8   | -0.78    | -1.060%        | 106.62  | -7.923   | -6.917%        |
| glass_blur        | 2        | 62.8  | -2.54    | -3.887%        | 48.124 | -5.066   | -9.525%        | 72.255 | -1.325   | -1.801%        | 106.694 | -7.849   | -6.853%        |
| gaussian_blur     | 2        | 63.67 | -1.67    | -2.556%        | 48.696 | -4.494   | -8.449%        | 73.001 | -0.579   | -0.787%        | 109.134 | -5.409   | -4.722%        |
| jpeg_compression  | 2        | 64.41 | -0.93    | -1.423%        | 48.315 | -4.875   | -9.166%        | 73.03  | -0.55    | -0.747%        | 112.252 | -2.291   | -2.000%        |
| contrast          | 2        | 62.82 | -2.52    | -3.857%        | 48.171 | -5.019   | -9.435%        | 72.269 | -1.311   | -1.781%        | 109.635 | -4.908   | -4.285%        |
| elastic_transform | 2        | 61.37 | -3.97    | -6.076%        | 46.748 | -6.442   | -12.111%       | 69.513 | -4.067   | -5.527%        | 96.654  | -17.889  | -15.618%       |
| pixelate          | 2        | 60.63 | -4.71    | -7.208%        | 47.194 | -5.996   | -11.274%       | 68.624 | -4.956   | -6.736%        | 99.434  | -15.109  | -13.191%       |
| snow              | 2        | 57.21 | -8.13    | -12.443%       | 44.737 | -8.453   | -15.892%       | 68.667 | -4.913   | -6.678%        | 88.402  | -22.141  | -22.822%       |
| frost             | 2        | 58.36 | -6.98    | -10.683%       | 45.691 | -7.499   | -14.099%       | 69.513 | -4.067   | -5.527%        | 91.338  | -23.205  | -20.259%       |
| fog               | 2        | 62.28 | -3.06    | -4.683%        | 48.37  | -4.82    | -9.062%        | 68.207 | -5.373   | -7.302%        | 108.536 | -6.03    | -5.264%        |
| brightness        | 2        | 64.28 | -1.06    | -1.622%        | 49.197 | -3.993   | -7.507%        | 72.815 | -0.765   | -1.040%        | 113.05  | -1.493   | -1.303%        |
| spatter           | 2        | 61.17 | -4.17    | -6.382%        | 47.671 | -5.519   | -10.377%       | 71.552 | -2.028   | -2.757%        | 103.588 | -10.955  | -9.564%        |
| saturate          | 2        | 59.18 | -6.16    | -9.428%        | 47.337 | -5.853   | -11.005%       | 69.858 | -3.722   | -5.059%        | 105.82  | -8.723   | -7.615%        |

  

| corruption        | severity | VQA   |          |                | GQA    |          |                | NLVR   |          |                | Caption |          |                |
|-------------------|----------|-------|----------|----------------|--------|----------|----------------|--------|----------|----------------|---------|----------|----------------|
|                   |          | Acc   | Decrease | Decrease Ratio | Acc    | Decrease | Decrease Ratio | Acc    | Decrease | Decrease Ratio | CIDer   | Decrease | Decrease Ratio |
| impulse_noise     | 3        | 61.21 | -4.13    | -6.321%        | 47.384 | -5.806   | -10.915%       | 70.934 | -2.646   | -3.596%        | 103.522 | -11.021  | -9.621%        |
| gaussian_noise    | 3        | 61.36 | -3.98    | -6.091%        | 47.376 | -5.814   | -10.930%       | 71.422 | -2.158   | -2.932%        | 103.362 | -11.181  | -9.762%        |
| shot_noise        | 3        | 61.22 | -4.12    | -6.305%        | 47.71  | -5.48    | -10.302%       | 70.863 | -2.717   | -3.693%        | 103.926 | -10.617  | -9.269%        |
| speckle_noise     | 3        | 61.7  | -3.64    | -5.571%        | 47.615 | -5.575   | -10.482%       | 70.906 | -2.674   | -3.635%        | 104.399 | -10.144  | -8.856%        |
| zoom_blur         | 3        | 52.63 | -12.71   | -19.452%       | 41.827 | -11.363  | -21.363%       | 60.729 | -12.851  | -17.465%       | 60.226  | -54.317  | -47.421%       |
| defocus_blur      | 3        | 61.45 | -3.89    | -5.953%        | 47.36  | -5.83    | -10.960%       | 70.604 | -2.976   | -4.044%        | 102.944 | -11.599  | -10.126%       |
| motion_blur       | 3        | 60.76 | -4.58    | -7.009%        | 47.297 | -5.893   | -11.079%       | 71.379 | -2.201   | -2.991%        | 99.824  | -14.579  | -12.850%       |
| glass_blur        | 3        | 58.01 | -7.33    | -11.218%       | 44.959 | -8.231   | -15.474%       | 69.585 | -3.995   | -5.429%        | 87.805  | -26.638  | -23.256%       |
| gaussian_blur     | 3        | 62.24 | -3.1     | -4.744%        | 48.004 | -5.186   | -9.749%        | 71.322 | -2.258   | -3.069%        | 104.888 | -9.655   | -8.429%        |
| jpeg_compression  | 3        | 63.99 | -1.35    | -2.066%        | 48.45  | -4.74    | -8.912%        | 72.542 | -1.038   | -1.411%        | 111.219 | -3.324   | -2.902%        |
| contrast          | 3        | 61.6  | -3.74    | -5.724%        | 47.591 | -5.599   | -10.526%       | 70.834 | -2.746   | -3.732%        | 105.57  | -8.973   | -7.834%        |
| elastic_transform | 3        | 62.97 | -2.37    | -3.627%        | 48.02  | -5.17    | -9.719%        | 72.757 | -0.823   | -1.118%        | 107.975 | -6.568   | -5.734%        |
| pixelate          | 3        | 58.51 | -6.83    | -10.453%       | 45.238 | -7.952   | -14.951%       | 66.844 | -6.736   | -9.155%        | 90.065  | -24.478  | -21.370%       |
| snow              | 3        | 55.74 | -9.6     | -14.692%       | 43.711 | -9.479   | -17.821%       | 66.844 | -6.736   | -9.155%        | 80.578  | -33.965  | -29.652%       |
| frost             | 3        | 55.94 | -9.4     | -14.386%       | 44.22  | -8.97    | -16.864%       | 67.705 | -5.875   | -7.985%        | 82.324  | -32.219  | -28.128%       |
| fog               | 3        | 61.13 | -4.21    | -6.443%        | 48.132 | -5.058   | -9.510%        | 71.552 | -2.028   | -2.757%        | 105.853 | -8.69    | -7.586%        |
| brightness        | 3        | 63.51 | -1.83    | -2.801%        | 48.338 | -4.852   | -9.121%        | 72.528 | -1.052   | -1.430%        | 110.715 | -3.828   | -3.342%        |
| spatter           | 3        | 59.7  | -5.64    | -8.632%        | 46.351 | -6.839   | -12.858%       | 70.877 | -2.703   | -3.674%        | 96.886  | -17.657  | -15.415%       |
| saturate          | 3        | 64.25 | -1.09    | -1.668%        | 48.259 | -4.931   | -9.271%        | 72.815 | -0.765   | -1.040%        | 111.882 | -2.661   | -2.323%        |

  

| corruption        | severity | VQA   |          |                | GQA    |          |                | NLVR   |          |                | Caption |          |                |
|-------------------|----------|-------|----------|----------------|--------|----------|----------------|--------|----------|----------------|---------|----------|----------------|
|                   |          | Acc   | Decrease | Decrease Ratio | Acc    | Decrease | Decrease Ratio | Acc    | Decrease | Decrease Ratio | CIDer   | Decrease | Decrease Ratio |
| impulse_noise     | 4        | 58.42 | -6.92    | -10.591%       | 46.327 | -6.863   | -12.903%       | 68.982 | -4.598   | -6.249%        | 93.878  | -20.665  | -18.041%       |
| gaussian_noise    | 4        | 59.01 | -6.33    | -9.688%        | 46.661 | -6.529   | -12.275%       | 69.054 | -4.526   | -6.151%        | 96.203  | -18.34   | -16.661%       |
| shot_noise        | 4        | 58.29 | -7.05    | -10.790%       | 46.311 | -6.879   | -12.933%       | 69.054 | -4.526   | -6.151%        | 94.592  | -19.951  | -17.418%       |
| speckle_noise     | 4        | 59.93 | -5.41    | -8.280%        | 47.313 | -5.877   | -11.050%       | 70.044 | -3.536   | -4.805%        | 101.619 | -12.924  | -11.283%       |
| zoom_blur         | 4        | 50.88 | -14.46   | -22.130%       | 40.38  | -12.81   | -24.083%       | 59.15  | -14.43   | -19.611%       | 50.257  | -64.286  | -56.124%       |
| defocus_blur      | 4        | 59.47 | -5.87    | -8.984%        | 46.637 | -6.553   | -12.320%       | 69.829 | -3.751   | -5.098%        | 95.621  | -18.922  | -16.520%       |
| motion_blur       | 4        | 58.3  | -7.04    | -10.774%       | 46.343 | -6.847   | -12.873%       | 68.624 | -4.956   | -6.736%        | 87.717  | -26.826  | -23.420%       |
| glass_blur        | 4        | 56.24 | -9.1     | -13.927%       | 43.743 | -9.447   | -17.761%       | 68.824 | -4.756   | -6.463%        | 79.445  | -35.098  | -30.642%       |
| gaussian_blur     | 4        | 60.26 | -5.08    | -7.775%        | 46.78  | -6.41    | -12.051%       | 70.576 | -3.004   | -4.083%        | 97.958  | -16.585  | -14.480%       |
| jpeg_compression  | 4        | 62.55 | -2.79    | -4.270%        | 47.726 | -5.464   | -10.272%       | 71.738 | -1.842   | -2.503%        | 106.674 | -7.869   | -6.870%        |
| contrast          | 4        | 57.65 | -7.69    | -11.769%       | 45.611 | -7.579   | -14.248%       | 67.805 | -5.775   | -7.848%        | 92.032  | -22.511  | -19.653%       |
| elastic_transform | 4        | 60.95 | -4.39    | -6.719%        | 46.828 | -6.362   | -11.961%       | 71.753 | -1.827   | -2.484%        | 99.181  | -15.362  | -13.412%       |
| pixelate          | 4        | 54.42 | -10.92   | -16.713%       | 42.19  | -10.29   | -19.345%       | 63.585 | -9.995   | -13.583%       | 73.761  | -40.782  | -35.604%       |
| snow              | 4        | 52.74 | -12.6    | -19.284%       | 42.37  | -11.053  | -20.780%       | 64.504 | -9.076   | -12.335%       | 65.683  | -48.86   | -42.657%       |
| frost             | 4        | 55.16 | -10.18   | -15.580%       | 43.799 | -9.391   | -17.656%       | 67.59  | -5.99    | -8.141%        | 79.575  | -34.786  | -30.370%       |
| fog               | 4        | 59.66 | -5.68    | -8.693%        | 46.732 | -6.458   | -12.141%       | 70.777 | -2.803   | -3.810%        | 101.097 | -13.446  | -11.739%       |
| brightness        | 4        | 62.69 | -2.65    | -4.056%        | 48.06  | -5.13    | -9.644%        | 71.566 | -2.014   | -2.737%        | 108.235 | -6.308   | -5.507%        |
| spatter           | 4        | 57.6  | -7.74    | -11.846%       | 44.864 | -8.326   | -15.653%       | 69.025 | -4.555   | -6.190%        | 87.767  | -23.376  | -23.376%       |
| saturate          | 4        | 61.19 | -4.15    | -6.351%        | 47.154 | -6.036   | -11.348%       | 71.035 | -2.545   | -3.459%        | 106.855 | -7.688   | -6.712%        |

  

| corruption     | severity | VQA   |          |                | GQA    |          |                | NLVR   |          |                | Caption |          |                |
|----------------|----------|-------|----------|----------------|--------|----------|----------------|--------|----------|----------------|---------|----------|----------------|
|                |          | Acc   | Decrease | Decrease Ratio | Acc    | Decrease | Decrease Ratio | Acc    | Decrease | Decrease Ratio | CIDer   | Decrease | Decrease Ratio |
| impulse_noise  | 5        | 54.72 | -10.62   | -16.253%       | 44.618 | -8.572   | -16.117%       | 66.801 | -6.779   | -9.214%        | 81.349  | -33.194  | -28.979%       |
| gaussian_noise | 5        | 54.93 | -10.41   | -15.932%       | 43.999 | -9.2     | -17.297%       | 66.844 | -6.736   | -9.155%        | 81.511  | -33.032  | -28.838%       |
| shot_noise     | 5        | 55.59 | -9.75    | -14.922%       | 45.039 | -8.151   | -15.324%       | 66.628 | -6.952   | -9.448%        | 85.88   | -28.663  | -25.024%       |
| speckle_noise  | 5        | 58.38 | -6.96    | -10.652%       | 46.    |          |                |        |          |                |         |          |                |



Table 17: Performance and decrease ratio of Single Prompt on CLIP-BART against image corruptions given severity 1 to 5.

| corruption        | severity | VQA   |          |                | GQA    |          |                | NLVR   |          |                | Caption |          |                |
|-------------------|----------|-------|----------|----------------|--------|----------|----------------|--------|----------|----------------|---------|----------|----------------|
|                   |          | Acc   | Decrease | Decrease Ratio | Acc    | Decrease | Decrease Ratio | Acc    | Decrease | Decrease Ratio | CIDer   | Decrease | Decrease Ratio |
| impulse_noise     | 1        | 43.08 | -0.92    | -2.091%        | 37.033 | -0.507   | -1.351%        | 52.289 | 0.339    | 0.653%         | 98.322  | -5.378   | -5.186%        |
| gaussian_noise    | 1        | 43.45 | -0.55    | -1.250%        | 37.112 | -0.428   | -1.139%        | 52.332 | 0.382    | 0.736%         | 100.992 | -2.708   | -2.611%        |
| shot_noise        | 1        | 43.4  | -0.6     | -1.364%        | 37.391 | -0.149   | -0.398%        | 51.974 | 0.024    | 0.045%         | 100.786 | -2.914   | -2.810%        |
| speckle_noise     | 1        | 43.48 | -0.52    | -1.182%        | 37.438 | -0.102   | -0.271%        | 52.49  | 0.54     | 1.040%         | 100.787 | -2.919   | -2.809%        |
| zoom_blur         | 1        | 41.64 | -2.36    | -5.364%        | 35.546 | -1.994   | -5.311%        | 51.643 | -0.307   | -0.590%        | 78.501  | -25.193  | -24.300%       |
| defocus_blur      | 1        | 43.56 | -0.44    | -1.000%        | 37.112 | -0.428   | -1.139%        | 52.103 | 0.153    | 0.294%         | 100.306 | -3.394   | -3.272%        |
| motion_blur       | 1        | 43.55 | -0.45    | -1.023%        | 37.081 | -0.459   | -1.224%        | 52.088 | 0.138    | 0.266%         | 99.851  | -3.849   | -3.712%        |
| glass_blur        | 1        | 43.69 | -0.31    | -0.705%        | 37.057 | -0.483   | -1.287%        | 51.816 | -0.134   | -0.259%        | 100.838 | -2.862   | -2.760%        |
| gaussian_blur     | 1        | 43.89 | -0.11    | -0.250%        | 37.383 | -0.157   | -0.419%        | 51.615 | -0.335   | -0.645%        | 102.584 | -1.116   | -1.076%        |
| jpeg_compression  | 1        | 43.82 | -0.18    | -0.409%        | 37.375 | -0.165   | -0.440%        | 52.404 | 0.454    | 0.874%         | 102.643 | -1.057   | -1.019%        |
| contrast          | 1        | 43.46 | -0.54    | -1.227%        | 37.192 | -0.348   | -0.927%        | 51.299 | -0.651   | -1.253%        | 101.459 | -2.241   | -2.161%        |
| elastic_transform | 1        | 43.86 | -0.14    | -0.318%        | 37.049 | -0.491   | -1.308%        | 51.256 | -0.694   | -1.336%        | 100.643 | -3.057   | -2.948%        |
| pixelate          | 1        | 42.6  | -1.4     | -3.182%        | 36.19  | -1.35    | -3.596%        | 51.931 | -0.019   | -0.037%        | 91.587  | -12.113  | -11.681%       |
| snow              | 1        | 41.66 | -2.34    | -5.318%        | 35.697 | -1.843   | -4.909%        | 50.639 | -1.311   | -2.524%        | 89.327  | -14.373  | -13.860%       |
| frost             | 1        | 42.4  | -1.6     | -3.636%        | 36.174 | -1.366   | -3.638%        | 52.031 | 0.081    | 0.156%         | 92.949  | -10.751  | -10.368%       |
| fog               | 1        | 43.2  | -0.8     | -1.818%        | 37.24  | -0.3     | -0.800%        | 51.787 | -0.163   | -0.314%        | 99.78   | -3.92    | -3.780%        |
| brightness        | 1        | 43.95 | -0.05    | -0.114%        | 37.502 | -0.038   | -0.101%        | 51.773 | -0.177   | -0.341%        | 102.852 | -0.848   | -0.817%        |
| spatter           | 1        | 43.73 | -0.27    | -0.614%        | 37.542 | 0.002    | 0.005%         | 51.787 | -0.163   | -0.314%        | 102.319 | -1.381   | -1.332%        |
| saturate          | 1        | 42.82 | -1.18    | -2.682%        | 37.605 | 0.065    | 0.174%         | 51.514 | -0.436   | -0.839%        | 100.085 | -3.615   | -3.486%        |

  

| corruption        | severity | VQA   |          |                | GQA    |          |                | NLVR   |          |                | Caption |          |                |
|-------------------|----------|-------|----------|----------------|--------|----------|----------------|--------|----------|----------------|---------|----------|----------------|
|                   |          | Acc   | Decrease | Decrease Ratio | Acc    | Decrease | Decrease Ratio | Acc    | Decrease | Decrease Ratio | CIDer   | Decrease | Decrease Ratio |
| impulse_noise     | 2        | 42.77 | -1.23    | -2.795%        | 36.723 | -0.817   | -2.177%        | 52.275 | 0.325    | 0.626%         | 95.272  | -8.428   | -8.127%        |
| gaussian_noise    | 2        | 43.29 | -0.71    | -1.614%        | 37.065 | -0.475   | -1.266%        | 52.131 | 0.181    | 0.349%         | 98.721  | -4.979   | -4.802%        |
| shot_noise        | 2        | 43.1  | -0.9     | -2.045%        | 36.858 | -0.682   | -1.817%        | 52.318 | 0.368    | 0.709%         | 98.176  | -5.524   | -5.326%        |
| speckle_noise     | 2        | 43.53 | -0.47    | -1.068%        | 37.081 | -0.459   | -1.224%        | 52.131 | 0.181    | 0.349%         | 99.913  | -3.787   | -3.652%        |
| zoom_blur         | 2        | 40.21 | -3.79    | -8.614%        | 34.417 | -3.123   | -8.318%        | 51.844 | -0.106   | -0.203%        | 67.813  | -35.887  | -34.607%       |
| defocus_blur      | 2        | 43.38 | -0.62    | -1.409%        | 36.834 | -0.706   | -1.880%        | 52.49  | 0.54     | 1.040%         | 97.478  | -6.222   | -6.000%        |
| motion_blur       | 2        | 43.15 | -0.85    | -1.932%        | 36.945 | -0.595   | -1.584%        | 52.017 | 0.067    | 0.128%         | 96.595  | -7.105   | -6.851%        |
| glass_blur        | 2        | 43.14 | -0.86    | -1.955%        | 36.683 | -0.857   | -2.283%        | 51.773 | -0.177   | -0.341%        | 96.533  | -7.167   | -6.911%        |
| gaussian_blur     | 2        | 43.5  | -0.5     | -1.136%        | 36.985 | -0.555   | -1.478%        | 52.246 | 0.296    | 0.570%         | 98.647  | -5.053   | -4.872%        |
| jpeg_compression  | 2        | 43.73 | -0.27    | -0.614%        | 37.446 | -0.094   | -0.250%        | 52.175 | 0.225    | 0.432%         | 101.048 | -2.652   | -2.558%        |
| contrast          | 2        | 43.21 | -0.79    | -1.795%        | 36.786 | -0.754   | -2.007%        | 51.816 | -0.134   | -0.259%        | 98.812  | -4.888   | -4.713%        |
| elastic_transform | 2        | 42.63 | -1.37    | -3.114%        | 35.999 | -1.541   | -4.104%        | 51.069 | -0.881   | -1.695%        | 87.721  | -15.979  | -15.408%       |
| pixelate          | 2        | 42.26 | -1.74    | -3.955%        | 36.166 | -1.374   | -3.659%        | 51.586 | -0.364   | -0.701%        | 88.7    | -15.0    | -14.465%       |
| snow              | 2        | 40.73 | -3.27    | -7.432%        | 34.751 | -2.789   | -7.429%        | 50.969 | -0.981   | -1.889%        | 78.355  | -25.345  | -24.441%       |
| frost             | 2        | 41.3  | -2.7     | -6.136%        | 35.689 | -1.851   | -4.930%        | 52.131 | 0.181    | 0.349%         | 81.882  | -21.818  | -21.039%       |
| fog               | 2        | 42.97 | -1.03    | -2.341%        | 37.017 | -0.523   | -1.393%        | 51.443 | -0.507   | -0.977%        | 98.666  | -5.034   | -4.855%        |
| brightness        | 2        | 43.71 | -0.29    | -0.659%        | 37.233 | -0.308   | -0.821%        | 51.758 | -0.192   | -0.369%        | 102.805 | -0.895   | -0.863%        |
| spatter           | 2        | 42.4  | -1.6     | -3.636%        | 36.333 | -1.207   | -3.214%        | 51.342 | -0.608   | -1.170%        | 93.188  | -10.512  | -10.137%       |
| saturate          | 2        | 41.84 | -2.16    | -4.909%        | 37.335 | -0.205   | -0.546%        | 51.615 | -0.335   | -0.645%        | 97.293  | -6.407   | -6.178%        |

  

| corruption        | severity | VQA   |          |                | GQA    |          |                | NLVR   |          |                | Caption |          |                |
|-------------------|----------|-------|----------|----------------|--------|----------|----------------|--------|----------|----------------|---------|----------|----------------|
|                   |          | Acc   | Decrease | Decrease Ratio | Acc    | Decrease | Decrease Ratio | Acc    | Decrease | Decrease Ratio | CIDer   | Decrease | Decrease Ratio |
| impulse_noise     | 3        | 42.46 | -1.54    | -3.500%        | 36.667 | -0.873   | -2.325%        | 52.218 | 0.268    | 0.515%         | 92.925  | -10.775  | -10.391%       |
| gaussian_noise    | 3        | 42.71 | -1.29    | -2.932%        | 36.437 | -1.103   | -2.939%        | 52.06  | 0.11     | 0.211%         | 93.189  | -10.511  | -10.136%       |
| shot_noise        | 3        | 42.55 | -1.45    | -3.295%        | 36.492 | -1.048   | -2.791%        | 52.074 | 0.124    | 0.239%         | 93.719  | -9.981   | -9.625%        |
| speckle_noise     | 3        | 42.72 | -1.28    | -2.909%        | 37.343 | -0.197   | -0.525%        | 51.931 | 0.019    | -0.037%        | 94.595  | -9.105   | -8.780%        |
| zoom_blur         | 3        | 39.03 | -4.97    | -11.295%       | 33.71  | -3.83    | -10.203%       | 51.787 | -0.163   | -0.314%        | 56.77   | -46.93   | -45.256%       |
| defocus_blur      | 3        | 42.76 | -1.24    | -2.818%        | 36.198 | -1.342   | -3.575%        | 52.203 | 0.253    | 0.487%         | 91.529  | -12.171  | -11.737%       |
| motion_blur       | 3        | 42.64 | -1.36    | -3.091%        | 36.58  | -0.96    | -2.558%        | 51.629 | -0.321   | -0.618%        | 91.016  | -12.684  | -12.231%       |
| glass_blur        | 3        | 41.27 | -2.73    | -6.205%        | 35.133 | -2.407   | -6.412%        | 51.543 | -0.407   | -0.783%        | 78.493  | -25.207  | -24.308%       |
| gaussian_blur     | 3        | 42.89 | -1.11    | -2.523%        | 36.453 | -1.087   | -2.897%        | 52.175 | 0.225    | 0.432%         | 93.08   | -10.62   | -10.241%       |
| jpeg_compression  | 3        | 43.57 | -0.43    | -0.977%        | 37.526 | -0.014   | -0.038%        | 52.117 | 0.167    | 0.322%         | 100.871 | -2.829   | -2.728%        |
| contrast          | 3        | 42.55 | -1.45    | -3.295%        | 36.301 | -1.239   | -3.299%        | 51.256 | -0.694   | -1.336%        | 94.962  | -8.738   | -8.426%        |
| elastic_transform | 3        | 43.27 | -0.73    | -1.659%        | 36.604 | -0.936   | -2.494%        | 52.16  | 0.21     | 0.405%         | 97.619  | -6.081   | -5.864%        |
| pixelate          | 3        | 41.63 | -2.37    | -5.386%        | 35.149 | -2.391   | -6.370%        | 50.409 | -1.541   | -2.966%        | 79.369  | -24.331  | -23.463%       |
| snow              | 3        | 39.84 | -4.16    | -9.455%        | 34.536 | -3.004   | -8.001%        | 50.926 | -1.024   | -1.972%        | 70.721  | -32.979  | -31.802%       |
| frost             | 3        | 40.14 | -3.86    | -8.773%        | 34.775 | -2.765   | -7.365%        | 51.428 | -0.522   | -1.005%        | 74.116  | -29.584  | -28.529%       |
| fog               | 3        | 42.5  | -1.5     | -3.409%        | 36.619 | -0.921   | -2.452%        | 51.299 | -0.651   | -1.253%        | 95.292  | -8.408   | -8.108%        |
| brightness        | 3        | 43.24 | -0.76    | -1.727%        | 36.826 | -0.714   | -1.901%        | 51.787 | -0.163   | -0.314%        | 100.519 | -3.181   | -3.067%        |
| spatter           | 3        | 41.72 | -2.28    | -5.182%        | 35.817 | -1.723   | -4.591%        | 51.629 | -0.321   | -0.618%        | 87.11   | -16.59   | -15.998%       |
| saturate          | 3        | 43.73 | -0.27    | -0.614%        | 37.502 | -0.038   | -0.101%        | 51.931 | -0.019   | -0.037%        | 102.193 | -1.507   | -1.453%        |

  

| corruption        | severity | VQA   |          |                | GQA    |          |                | NLVR   |          |                | Caption |          |                |
|-------------------|----------|-------|----------|----------------|--------|----------|----------------|--------|----------|----------------|---------|----------|----------------|
|                   |          | Acc   | Decrease | Decrease Ratio | Acc    | Decrease | Decrease Ratio | Acc    | Decrease | Decrease Ratio | CIDer   | Decrease | Decrease Ratio |
| impulse_noise     | 4        | 41.7  | -2.3     | -5.227%        | 35.832 | -1.708   | -4.549%        | 51.313 | -0.637   | -1.226%        | 85.122  | -18.578  | -17.915%       |
| gaussian_noise    | 4        | 41.95 | -2.05    | -4.659%        | 36.262 | -1.278   | -3.405%        | 51.155 | -0.795   | -1.529%        | 85.157  | -18.543  | -17.881%       |
| shot_noise        | 4        | 41.82 | -2.18    | -4.955%        | 36.286 | -1.254   | -3.342%        | 51.385 | -0.565   | -1.087%        | 83.743  | -19.957  | -19.245%       |
| speckle_noise     | 4        | 42.23 | -1.77    | -4.023%        | 36.874 | -0.666   | -1.774%        | 51.486 | -0.464   | -0.894%        | 90.264  | -13.346  | -12.957%       |
| zoom_blur         | 4        | 38.31 | -5.69    | -12.932%       | 32.97  | -4.57    | -12.173%       | 51.773 | -0.177   | -0.341%        | 48.834  | -54.866  | -52.908%       |
| defocus_blur      | 4        | 42.18 | -1.82    | -4.136%        | 35.817 | -1.723   | -4.591%        | 52.146 | 0.196    | 0.377%         | 85.495  | -18.205  | -17.555%       |
| motion_blur       | 4        | 41.64 | -2.36    | -5.364%        | 35.3   | -2.24    | -5.968%        | 51.816 | -0.134   | -0.259%        | 79.89   | -23.81   | -22.961%       |
| glass_blur        | 4        | 40.7  | -3.3     | -7.500%        | 34.449 | -3.091   | -8.234%        | 51.012 | -0.938   | -1.806%        | 69.33   | -34.37   | -33.144%       |
| gaussian_blur     | 4        | 42.18 | -1.82    | -4.136%        | 35.999 | -1.541   | -4.104%        | 52.505 | 0.555    | 1.068%         | 87.297  | -16.403  | -15.818%       |
| jpeg_compression  | 4        | 42.99 | -1.01    | -2.295%        | 36.763 | -0.777   | -2.071%        | 51.859 | -0.091   | -0.176%        | 97.132  | -6.568   | -6.334%        |
| contrast          | 4        | 41.05 | -2.95    | -6.705%        | 35.61  | -1.93    | -5.142%        | 49.691 | -2.259   | -4.348%        | 82.68   | -21.02   | -20.270%       |
| elastic_transform | 4        | 42.7  | -1.3     | -2.955%        | 35.673 | -1.867   | -4.972%        | 52.706 | 0.756    | 1.454%         | 89.234  | -14.466  | -13.949%       |
| pixelate          | 4        | 40.2  | -3.8     | -8.636%        | 34.147 | -3.393   | -9.039%        | 50.165 | -1.785   | -3.436%        | 67.483  | -39.217  | -37.818%       |
| snow              | 4        | 38.84 | -5.16    | -11.727%       | 33.686 | -3.854   | -10.267%       | 50.653 | -1.297   | -2.496%        | 54.262  | -46.438  | -44.781%       |
| frost             | 4        | 39.96 | -4.04    | -9.182%        | 34.552 | -2.988   | -7.958%        | 52.677 | 0.727    | 1.399%         | 69.632  | -34.068  | -32.852%       |
| fog               | 4        | 42.01 | -1.99    | -4.523%        | 35.92  | -1.62    | -4.316%        | 51.629 | -0.321   | -0.618%        | 90.375  | -13.325  | -12.849%       |
| brightness        | 4        | 42.89 | -1.11    | -2.523%        | 36.699 | -0.841   | -2.240%        | 51.443 | -0.507   | -0.977%        | 98.275  | -5.425   | -5.232%        |
| spatter           | 4        | 40.86 | -3.14    | -7.136%        | 35.721 | -1.819   | -4.845%        | 52.361 | 0.411    | 0.791%         | 78.18   | -25.52   | -24.610%       |
| saturate          | 4        | 42.56 | -1.44    | -3.273%        | 36.635 | -0.905   | -2.410%        | 51.213 | -0.737   | -1.419%        | 97.633  | -6.067   | -5.851%        |

  

| corruption     | severity | VQA   |          |                | GQA    |          |                | NLVR   |          |                | Caption |          |                |
|----------------|----------|-------|----------|----------------|--------|----------|----------------|--------|----------|----------------|---------|----------|----------------|
|                |          | Acc   | Decrease | Decrease Ratio | Acc    | Decrease | Decrease Ratio | Acc    | Decrease | Decrease Ratio | CIDer   | Decrease | Decrease Ratio |
| impulse_noise  | 5        | 40.35 | -3.65    | -8.295%        | 35.061 | -2.479   | -6.603%        | 50.754 | -1.196   | -2.303%        | 72.487  | -31.213  | -30.099%       |
| gaussian_noise | 5        | 40.16 | -3.84    | -8.727%        | 35.554 | -1.986   | -5.290%        | 50.725 | -1.225   | -2.358%        | 72.331  | -31.369  | -30.250%       |
| shot_noise     | 5        | 40.52 | -3.48    | -7.909%        | 35.18  | -2.36    | -6.285%        | 50.452 | -1.498   | -2.883%        | 75.718  | -27.982  | -26.983%       |
| speckle_noise  | 5        | 41.61 | -2.39    | -5.432%        | 36.365 | -1.175   | -3.130%        | 50.581 | -1.369   | -2.635%        | 84.932  | -18.768  | -18.098%       |
| zoom_blur      | 5        | 37.63 |          |                |        |          |                |        |          |                |         |          |                |

Table 18: Performance and decrease ratio of Full Finetuning on CLIP-T5 against image corruptions given severity 1 to 5.

| corruption        | severity | VQA   |          |                | GQA    |          |                | NLVR   |          |                | Caption |          |                |
|-------------------|----------|-------|----------|----------------|--------|----------|----------------|--------|----------|----------------|---------|----------|----------------|
|                   |          | Acc   | Decrease | Decrease Ratio | Acc    | Decrease | Decrease Ratio | Acc    | Decrease | Decrease Ratio | CIDer   | Decrease | Decrease Ratio |
| impulse_noise     | 1        | 64.29 | -2.0     | -3.017%        | 54.19  | -2.63    | -4.629%        | 72.413 | -1.647   | -2.224%        | 106.157 | -5.343   | -4.791%        |
| gaussian_noise    | 1        | 65.01 | -1.28    | -1.931%        | 54.969 | -1.851   | -3.258%        | 73.159 | -0.901   | -1.216%        | 109.054 | -2.446   | -2.194%        |
| shot_noise        | 1        | 65.07 | -1.22    | -1.840%        | 54.818 | -2.002   | -3.524%        | 73.188 | -0.872   | -1.178%        | 108.978 | -2.522   | -2.261%        |
| speckle_noise     | 1        | 65.05 | -1.24    | -1.871%        | 54.556 | -2.264   | -3.985%        | 73.044 | -1.016   | -1.371%        | 109.044 | -2.456   | -2.202%        |
| zoom_blur         | 1        | 59.3  | -6.99    | -10.545%       | 51.375 | -5.445   | -9.582%        | 59.035 | -15.025  | -20.287%       | 84.714  | -26.786  | -24.023%       |
| defocus_blur      | 1        | 65.01 | -1.28    | -1.931%        | 54.858 | -1.962   | -3.454%        | 73.475 | -0.585   | -0.790%        | 108.776 | -2.724   | -2.443%        |
| motion_blur       | 1        | 64.56 | -1.73    | -2.610%        | 54.961 | -1.859   | -3.272%        | 73.016 | -1.044   | -1.410%        | 107.017 | -4.483   | -4.021%        |
| glass_blur        | 1        | 65.2  | -1.09    | -1.644%        | 54.937 | -1.883   | -3.314%        | 73.26  | -0.8     | -1.081%        | 108.969 | -2.531   | -2.270%        |
| gaussian_blur     | 1        | 65.83 | -0.46    | -0.694%        | 55.541 | -1.279   | -2.250%        | 74.107 | 0.047    | 0.063%         | 111.538 | 0.038    | 0.035%         |
| jpeg_compression  | 1        | 65.66 | -0.63    | -0.950%        | 55.406 | -1.414   | -2.488%        | 73.776 | -0.284   | -0.383%        | 111.035 | -0.465   | -0.417%        |
| contrast          | 1        | 65.1  | -1.19    | -1.795%        | 55.629 | -1.191   | -2.096%        | 73.288 | -0.772   | -1.042%        | 108.6   | -2.9     | -2.600%        |
| elastic_transform | 1        | 65.51 | -0.78    | -1.177%        | 55.192 | -1.628   | -2.866%        | 73.489 | -0.571   | -0.771%        | 109.643 | -2.037   | -1.827%        |
| pixelate          | 1        | 62.9  | -3.39    | -5.114%        | 54.349 | -2.471   | -4.349%        | 71.609 | -2.451   | -3.309%        | 100.583 | -10.917  | -9.791%        |
| snow              | 1        | 61.47 | -4.82    | -7.721%        | 51.693 | -5.127   | -9.022%        | 72.068 | -1.992   | -2.689%        | 98.17   | -13.33   | -11.955%       |
| frost             | 1        | 62.75 | -3.54    | -5.340%        | 53.069 | -3.751   | -6.602%        | 72.269 | -1.791   | -2.418%        | 101.346 | -10.154  | -9.107%        |
| fog               | 1        | 64.43 | -1.86    | -2.806%        | 55.152 | -1.668   | -2.936%        | 73.245 | -0.815   | -1.100%        | 108.376 | -3.124   | -2.802%        |
| brightness        | 1        | 65.96 | -0.33    | -0.498%        | 55.184 | -1.636   | -2.880%        | 74.293 | 0.233    | 0.315%         | 111.749 | 0.249    | 0.223%         |
| spatter           | 1        | 65.54 | -0.75    | -1.131%        | 55.541 | -1.279   | -2.250%        | 74.566 | 0.506    | 0.683%         | 110.042 | -1.458   | -1.308%        |
| saturate          | 1        | 63.3  | -2.99    | -4.510%        | 54.412 | -2.408   | -4.237%        | 72.7   | -1.36    | -1.837%        | 108.141 | -3.359   | -3.012%        |

  

| corruption        | severity | VQA   |          |                | GQA    |          |                | NLVR   |          |                | Caption |          |                |
|-------------------|----------|-------|----------|----------------|--------|----------|----------------|--------|----------|----------------|---------|----------|----------------|
|                   |          | Acc   | Decrease | Decrease Ratio | Acc    | Decrease | Decrease Ratio | Acc    | Decrease | Decrease Ratio | CIDer   | Decrease | Decrease Ratio |
| impulse_noise     | 2        | 63.53 | -2.76    | -4.164%        | 53.602 | -3.218   | -5.664%        | 72.499 | -1.561   | -2.108%        | 103.546 | -7.954   | -7.133%        |
| gaussian_noise    | 2        | 64.59 | -1.7     | -2.564%        | 54.055 | -2.765   | -4.867%        | 72.786 | -1.274   | -1.720%        | 107.698 | -3.802   | -3.410%        |
| shot_noise        | 2        | 64.2  | -2.09    | -3.153%        | 53.665 | -3.155   | -5.522%        | 72.169 | -1.891   | -2.554%        | 106.268 | -5.232   | -4.692%        |
| speckle_noise     | 2        | 64.79 | -1.5     | -2.263%        | 54.468 | -2.352   | -4.139%        | 72.872 | -1.188   | -1.604%        | 107.593 | -3.907   | -3.504%        |
| zoom_blur         | 2        | 56.2  | -10.09   | -15.221%       | 49.054 | -7.766   | -13.668%       | 63.944 | -10.116  | -13.659%       | 70.213  | -41.287  | -37.029%       |
| defocus_blur      | 2        | 64.44 | -1.85    | -2.791%        | 54.556 | -2.264   | -3.985%        | 72.757 | -1.303   | -1.759%        | 106.958 | -4.542   | -4.074%        |
| motion_blur       | 2        | 63.79 | -2.5     | -3.771%        | 54.667 | -2.153   | -3.789%        | 72.312 | -1.748   | -2.360%        | 104.51  | -6.99    | -6.269%        |
| glass_blur        | 2        | 64.06 | -2.23    | -3.364%        | 54.238 | -2.582   | -4.545%        | 71.997 | -2.063   | -2.786%        | 105.223 | -6.277   | -5.630%        |
| gaussian_blur     | 2        | 64.69 | -1.6     | -2.414%        | 54.754 | -2.066   | -3.635%        | 73.059 | -1.001   | -1.352%        | 108.336 | -3.164   | -2.837%        |
| jpeg_compression  | 2        | 65.47 | -0.82    | -1.237%        | 55.144 | -1.676   | -2.950%        | 73.618 | -0.442   | -0.596%        | 109.517 | -1.983   | -1.778%        |
| contrast          | 2        | 64.42 | -1.87    | -2.821%        | 54.969 | -1.851   | -3.258%        | 72.772 | -1.288   | -1.740%        | 106.565 | -4.935   | -4.426%        |
| elastic_transform | 2        | 62.35 | -3.94    | -5.944%        | 53.037 | -3.783   | -6.658%        | 69.757 | -4.303   | -5.810%        | 96.449  | -15.051  | -13.498%       |
| pixelate          | 2        | 61.99 | -4.3     | -6.487%        | 53.586 | -3.234   | -5.692%        | 69.068 | -4.992   | -6.740%        | 98.122  | -13.378  | -11.998%       |
| snow              | 2        | 58.41 | -7.88    | -11.887%       | 49.881 | -6.939   | -12.213%       | 69.284 | -4.776   | -6.449%        | 86.106  | -25.394  | -22.775%       |
| frost             | 2        | 59.26 | -7.03    | -10.605%       | 50.811 | -6.009   | -10.576%       | 69.628 | -4.432   | -5.984%        | 88.499  | -23.001  | -20.628%       |
| fog               | 2        | 63.61 | -2.68    | -4.043%        | 54.762 | -2.058   | -3.621%        | 69.155 | -4.905   | -6.624%        | 106.338 | -5.162   | -4.629%        |
| brightness        | 2        | 65.01 | -1.28    | -1.931%        | 55.033 | -1.787   | -3.146%        | 73.475 | -0.585   | -0.790%        | 110.275 | -1.225   | -1.099%        |
| spatter           | 2        | 62.33 | -3.96    | -5.974%        | 53.021 | -3.799   | -6.686%        | 72.513 | -1.547   | -2.088%        | 100.702 | -10.798  | -9.684%        |
| saturate          | 2        | 60.63 | -5.66    | -8.538%        | 53.435 | -3.385   | -5.958%        | 69.987 | -4.073   | -5.499%        | 102.159 | -9.341   | -8.377%        |

  

| corruption        | severity | VQA   |          |                | GQA    |          |                | NLVR   |          |                | Caption |          |                |
|-------------------|----------|-------|----------|----------------|--------|----------|----------------|--------|----------|----------------|---------|----------|----------------|
|                   |          | Acc   | Decrease | Decrease Ratio | Acc    | Decrease | Decrease Ratio | Acc    | Decrease | Decrease Ratio | CIDer   | Decrease | Decrease Ratio |
| impulse_noise     | 3        | 62.53 | -3.76    | -5.672%        | 53.236 | -3.584   | -6.308%        | 71.623 | -2.437   | -3.290%        | 101.179 | -10.321  | -9.257%        |
| gaussian_noise    | 3        | 63.01 | -3.28    | -4.948%        | 52.965 | -3.855   | -6.784%        | 71.666 | -2.394   | -3.232%        | 101.83  | -9.67    | -8.673%        |
| shot_noise        | 3        | 62.72 | -3.57    | -5.385%        | 53.379 | -3.441   | -6.056%        | 70.791 | -3.269   | -4.414%        | 101.888 | -9.612   | -8.621%        |
| speckle_noise     | 3        | 62.82 | -3.47    | -5.235%        | 53.49  | -3.33    | -5.860%        | 71.422 | -2.638   | -3.561%        | 101.97  | -9.53    | -8.547%        |
| zoom_blur         | 3        | 53.66 | -12.63   | -19.053%       | 47.567 | -9.253   | -16.284%       | 61.174 | -12.886  | -17.399%       | 56.507  | -54.993  | -49.321%       |
| defocus_blur      | 3        | 62.72 | -3.57    | -5.385%        | 53.538 | -3.282   | -5.776%        | 70.848 | -3.212   | -4.337%        | 100.814 | -10.686  | -9.584%        |
| motion_blur       | 3        | 62.1  | -4.19    | -6.321%        | 53.339 | -3.481   | -6.126%        | 70.705 | -3.355   | -4.530%        | 98.675  | -12.825  | -11.502%       |
| glass_blur        | 3        | 59.02 | -7.27    | -10.967%       | 50.493 | -6.327   | -11.135%       | 68.939 | -5.121   | -6.914%        | 85.372  | -26.128  | -23.433%       |
| gaussian_blur     | 3        | 63.15 | -3.14    | -4.737%        | 54.087 | -2.733   | -4.811%        | 71.753 | -2.307   | -3.116%        | 102.983 | -8.517   | -7.638%        |
| jpeg_compression  | 3        | 64.98 | -1.31    | -1.976%        | 54.921 | -1.899   | -3.342%        | 73.662 | -0.398   | -0.538%        | 108.661 | -2.839   | -2.547%        |
| contrast          | 3        | 62.82 | -3.47    | -5.235%        | 54.158 | -2.662   | -4.685%        | 71.509 | -2.551   | -3.445%        | 101.702 | -9.798   | -8.788%        |
| elastic_transform | 3        | 64.15 | -2.14    | -3.228%        | 53.808 | -3.012   | -5.301%        | 72.47  | -1.59    | -2.147%        | 104.869 | -6.631   | -5.947%        |
| pixelate          | 3        | 59.64 | -6.65    | -10.032%       | 52.385 | -4.435   | -7.805%        | 67.906 | -6.154   | -8.310%        | 88.665  | -22.835  | -20.480%       |
| snow              | 3        | 56.65 | -9.64    | -14.542%       | 48.831 | -7.989   | -14.060%       | 66.858 | -7.202   | -9.724%        | 78.893  | -32.607  | -29.244%       |
| frost             | 3        | 56.82 | -9.47    | -14.286%       | 49.547 | -7.273   | -12.800%       | 67.447 | -6.613   | -8.930%        | 79.193  | -32.307  | -28.975%       |
| fog               | 3        | 62.46 | -3.83    | -5.778%        | 54.206 | -2.614   | -4.601%        | 72.054 | -2.006   | -2.709%        | 103.031 | -8.469   | -7.596%        |
| brightness        | 3        | 64.52 | -1.77    | -2.670%        | 54.961 | -1.859   | -3.272%        | 72.686 | -1.374   | -1.856%        | 108.419 | -3.081   | -2.763%        |
| spatter           | 3        | 60.84 | -5.45    | -8.221%        | 52.369 | -4.451   | -7.833%        | 71.882 | -2.178   | -2.941%        | 95.642  | -15.858  | -14.222%       |
| saturate          | 3        | 65.17 | -1.12    | -1.690%        | 54.953 | -1.867   | -3.286%        | 73.374 | -0.686   | -0.926%        | 110.019 | -1.481   | -1.328%        |

  

| corruption        | severity | VQA   |          |                | GQA    |          |                | NLVR   |          |                | Caption |          |                |
|-------------------|----------|-------|----------|----------------|--------|----------|----------------|--------|----------|----------------|---------|----------|----------------|
|                   |          | Acc   | Decrease | Decrease Ratio | Acc    | Decrease | Decrease Ratio | Acc    | Decrease | Decrease Ratio | CIDer   | Decrease | Decrease Ratio |
| impulse_noise     | 4        | 60.13 | -6.16    | -9.293%        | 51.813 | -5.007   | -8.813%        | 69.198 | -4.862   | -6.565%        | 91.621  | -19.879  | -17.829%       |
| gaussian_noise    | 4        | 60.37 | -5.92    | -8.930%        | 52.21  | -4.61    | -8.113%        | 69.887 | -4.173   | -5.635%        | 94.151  | -17.349  | -15.559%       |
| shot_noise        | 4        | 59.82 | -6.47    | -9.760%        | 51.701 | -5.119   | -9.008%        | 68.451 | -5.609   | -7.573%        | 91.7    | -19.8    | -17.758%       |
| speckle_noise     | 4        | 61.48 | -4.81    | -7.256%        | 53.109 | -3.711   | -6.532%        | 69.786 | -4.274   | -5.771%        | 97.774  | -13.726  | -12.311%       |
| zoom_blur         | 4        | 51.58 | -14.71   | -22.190%       | 45.961 | -10.859  | -19.111%       | 59.409 | -14.651  | -19.783%       | 64.098  | -65.402  | -58.656%       |
| defocus_blur      | 4        | 60.91 | -5.38    | -8.116%        | 52.759 | -4.061   | -7.148%        | 69.298 | -4.762   | -6.430%        | 93.946  | -17.554  | -15.744%       |
| motion_blur       | 4        | 59.37 | -6.92    | -10.439%       | 51.59  | -5.23    | -9.204%        | 68.423 | -5.637   | -7.612%        | 87.289  | -24.211  | -21.713%       |
| glass_blur        | 4        | 56.9  | -9.39    | -14.165%       | 49.73  | -7.09    | -12.479%       | 67.475 | -6.585   | -8.891%        | 78.169  | -33.331  | -29.893%       |
| gaussian_blur     | 4        | 61.27 | -5.02    | -7.573%        | 52.822 | -3.998   | -7.036%        | 70.044 | -4.016   | -5.422%        | 96.796  | -14.704  | -13.188%       |
| jpeg_compression  | 4        | 63.91 | -2.38    | -3.590%        | 54.19  | -2.63    | -4.629%        | 72.729 | -1.331   | -1.798%        | 104.728 | -6.772   | -6.073%        |
| contrast          | 4        | 58.57 | -7.72    | -11.646%       | 51.598 | -5.222   | -9.190%        | 68.092 | -5.968   | -8.058%        | 89.528  | -21.972  | -19.706%       |
| elastic_transform | 4        | 61.91 | -4.38    | -6.607%        | 52.361 | -4.459   | -7.847%        | 71.25  | -2.81    | -3.794%        | 96.929  | -14.571  | -13.068%       |
| pixelate          | 4        | 55.66 | -10.63   | -16.036%       | 49.873 | -6.947   | -12.227%       | 64.317 | -9.743   | -13.155%       | 74.119  | -37.381  | -33.525%       |
| snow              | 4        | 53.52 | -12.77   | -19.264%       | 47.217 | -9.603   | -16.900%       | 63.715 | -10.345  | -13.969%       | 64.304  | -47.196  | -42.328%       |
| frost             | 4        | 55.8  | -10.49   | -15.824%       | 49.165 | -7.655   | -13.472%       | 67.59  | -6.47    | -8.736%        | 76.626  | -34.874  | -31.277%       |
| fog               | 4        | 60.8  | -5.49    | -8.282%        | 52.783 | -4.037   | -7.106%        | 71.781 | -2.279   | -3.077%        | 97.573  | -13.927  | -12.491%       |
| brightness        | 4        | 63.48 | -2.81    | -4.239%        | 54.452 | -2.368   | -4.167%        | 71.939 | -2.121   | -2.864%        | 106.198 | -5.302   | -4.755%        |
| spatter           | 4        | 58.61 | -7.68    | -11.585%       | 50.747 | -6.073   | -10.688%       | 68.839 | -5.221   | -7.050%        | 84.966  | -26.534  | -23.798%       |
| saturate          | 4        | 62.25 | -4.04    | -6.094%        | 52.56  | -4.26    | -7.497%        | 71.681 | -2.379   | -3.213%        | 102.472 | -9.028   | -8.097%        |

  

| corruption     | severity | VQA   |          |                | GQA    |          |                | NLVR   |          |                | Caption |          |                |
|----------------|----------|-------|----------|----------------|--------|----------|----------------|--------|----------|----------------|---------|----------|----------------|
|                |          | Acc   | Decrease | Decrease Ratio | Acc    | Decrease | Decrease Ratio | Acc    | Decrease | Decrease Ratio | CIDer   | Decrease | Decrease Ratio |
| impulse_noise  | 5        | 55.83 | -10.46   | -15.779%       | 50.08  | -6.74    | -11.863%       | 66.829 | -7.231   | -9.763%        | 79.113  | -32.387  | -29.047%       |
| gaussian_noise | 5        | 56.08 | -10.21   | -15.402%       | 49.849 | -6.971   | -12.269%       | 66.844 | -7.216   | -9.744%        | 79.032  | -32.468  | -29.119%       |
| shot_noise     | 5        | 57.13 | -9.16    | -13.818%       | 50.405 | -6.415   | -11.289%       | 66.815 | -7.245   | -9.783%        | 82.265  | -29.235  | -26.220%       |
| speckle_noise  | 5        | 59.83 | -6.46    | -9.745%        | 51.59  | -5.23    | -9.204%        | 67.963 |          |                |         |          |                |

Table 19: Performance and decrease ratio of Hyperformer on CLIP-T5 against image corruptions given severity 1 to 5.

| corruption        | severity | VQA   |          |                | GQA    |          |                | NLVR   |          |                | Caption |          |                |
|-------------------|----------|-------|----------|----------------|--------|----------|----------------|--------|----------|----------------|---------|----------|----------------|
|                   |          | Acc   | Decrease | Decrease Ratio | Acc    | Decrease | Decrease Ratio | Acc    | Decrease | Decrease Ratio | CIDer   | Decrease | Decrease Ratio |
| impulse_noise     | 1        | 63.67 | -1.51    | -2.317%        | 52.878 | -1.772   | -3.242%        | 69.973 | -0.587   | -0.832%        | 105.964 | -4.685   | -4.234%        |
| gaussian_noise    | 1        | 64.37 | -0.81    | -1.243%        | 52.83  | -1.82    | -3.300%        | 70.647 | 0.087    | 0.124%         | 108.276 | -2.373   | -2.145%        |
| shot_noise        | 1        | 64.2  | -0.98    | -1.504%        | 53.323 | -1.327   | -2.428%        | 70.274 | -0.286   | -0.405%        | 109.259 | -1.39    | -1.257%        |
| speckle_noise     | 1        | 64.18 | -1.0     | -1.534%        | 53.117 | -1.533   | -2.806%        | 70.102 | -0.458   | -0.649%        | 109.629 | -1.02    | -0.922%        |
| zoom_blur         | 1        | 59.01 | -6.17    | -9.466%        | 50.564 | -4.086   | -7.476%        | 56.882 | -13.678  | -19.384%       | 85.215  | -25.434  | -22.986%       |
| defocus_blur      | 1        | 64.12 | -1.06    | -1.626%        | 53.546 | -1.104   | -2.020%        | 70.992 | 0.432    | 0.612%         | 107.981 | -2.668   | -2.411%        |
| motion_blur       | 1        | 63.9  | -1.28    | -1.964%        | 53.291 | -1.359   | -2.486%        | 70.26  | -0.3     | -0.425%        | 107.244 | -3.405   | -3.077%        |
| glass_blur        | 1        | 64.35 | -0.83    | -1.273%        | 53.212 | -1.438   | -2.631%        | 70.705 | 0.145    | 0.205%         | 108.233 | -2.416   | -2.183%        |
| gaussian_blur     | 1        | 64.95 | -0.23    | -0.353%        | 53.959 | -0.691   | -1.264%        | 71.135 | 0.575    | 0.815%         | 109.927 | -0.722   | -0.653%        |
| jpeg_compression  | 1        | 64.57 | -0.61    | -0.936%        | 53.22  | -1.43    | -2.617%        | 71.021 | 0.461    | 0.653%         | 109.879 | -0.77    | -0.696%        |
| contrast          | 1        | 63.72 | -1.46    | -2.240%        | 53.474 | -1.176   | -2.151%        | 69.93  | -0.63    | -0.893%        | 109.584 | -1.065   | -0.963%        |
| elastic_transform | 1        | 64.48 | -0.7     | -1.074%        | 53.554 | -1.096   | -2.006%        | 70.346 | -0.214   | -0.303%        | 109.275 | -1.374   | -1.242%        |
| pixelate          | 1        | 62.07 | -3.11    | -4.771%        | 52.91  | -1.74    | -3.184%        | 69.011 | -1.549   | -2.195%        | 100.738 | -9.911   | -8.958%        |
| snow              | 1        | 61.08 | -4.1     | -6.290%        | 50.962 | -3.688   | -6.748%        | 68.911 | -1.649   | -2.338%        | 98.052  | -12.597  | -11.385%       |
| frost             | 1        | 62.19 | -2.99    | -4.587%        | 51.94  | -2.71    | -4.959%        | 69.427 | -1.133   | -1.605%        | 100.993 | -9.656   | -8.727%        |
| fog               | 1        | 63.47 | -1.71    | -2.624%        | 53.665 | -0.985   | -1.802%        | 69.973 | -0.587   | -0.832%        | 108.614 | -2.035   | -1.839%        |
| brightness        | 1        | 65.04 | -0.14    | -0.215%        | 53.49  | -1.16    | -2.122%        | 71.15  | 0.59     | 0.836%         | 110.949 | 0.3      | 0.271%         |
| spatter           | 1        | 64.82 | -0.36    | -0.552%        | 53.768 | -0.882   | -1.613%        | 70.992 | 0.432    | 0.612%         | 110.218 | -0.431   | -0.389%        |
| saturate          | 1        | 62.58 | -2.6     | -3.989%        | 52.663 | -1.987   | -3.635%        | 69.312 | -1.248   | -1.768%        | 107.263 | -3.386   | -3.060%        |

  

| corruption        | severity | VQA   |          |                | GQA    |          |                | NLVR   |          |                | Caption |          |                |
|-------------------|----------|-------|----------|----------------|--------|----------|----------------|--------|----------|----------------|---------|----------|----------------|
|                   |          | Acc   | Decrease | Decrease Ratio | Acc    | Decrease | Decrease Ratio | Acc    | Decrease | Decrease Ratio | CIDer   | Decrease | Decrease Ratio |
| impulse_noise     | 2        | 62.92 | -2.26    | -3.467%        | 52.123 | -2.527   | -4.624%        | 69.6   | -0.96    | -1.361%        | 103.856 | -6.793   | -6.139%        |
| gaussian_noise    | 2        | 63.58 | -1.6     | -2.455%        | 52.377 | -2.273   | -4.159%        | 69.958 | -0.602   | -0.853%        | 107.272 | -3.377   | -3.052%        |
| shot_noise        | 2        | 63.5  | -1.68    | -2.577%        | 52.91  | -1.74    | -3.184%        | 69.556 | -1.004   | -1.422%        | 106.947 | -3.702   | -3.346%        |
| speckle_noise     | 2        | 63.89 | -1.29    | -1.979%        | 52.934 | -1.716   | -3.141%        | 69.858 | -0.702   | -0.995%        | 108.21  | -2.439   | -2.205%        |
| zoom_blur         | 2        | 56.0  | -9.18    | -14.084%       | 48.807 | -5.843   | -10.691%       | 61.519 | -9.041   | -12.814%       | 72.413  | -38.236  | -34.556%       |
| defocus_blur      | 2        | 63.73 | -1.45    | -2.225%        | 53.125 | -1.525   | -2.791%        | 70.317 | -0.243   | -0.344%        | 106.855 | -3.794   | -3.429%        |
| motion_blur       | 2        | 63.05 | -2.13    | -3.268%        | 52.862 | -1.788   | -3.271%        | 70.446 | -0.114   | -0.161%        | 104.409 | -6.24    | -5.639%        |
| glass_blur        | 2        | 63.27 | -1.91    | -2.930%        | 52.457 | -2.193   | -4.013%        | 69.93  | -0.63    | -0.893%        | 104.476 | -6.173   | -5.579%        |
| gaussian_blur     | 2        | 63.97 | -1.21    | -1.856%        | 53.117 | -1.533   | -2.806%        | 70.418 | -0.142   | -0.202%        | 107.399 | -3.25    | -2.937%        |
| jpeg_compression  | 2        | 64.3  | -0.88    | -1.350%        | 52.981 | -1.669   | -3.053%        | 70.848 | 0.288    | 0.409%         | 109.921 | -0.728   | -0.658%        |
| contrast          | 2        | 63.0  | -2.18    | -3.345%        | 53.14  | -1.51    | -2.762%        | 69.341 | -1.219   | -1.727%        | 107.914 | -2.735   | -2.472%        |
| elastic_transform | 2        | 61.76 | -3.42    | -5.247%        | 51.996 | -2.654   | -4.857%        | 66.614 | -3.946   | -5.929%        | 95.92   | -14.729  | -13.311%       |
| pixelate          | 2        | 61.36 | -3.82    | -5.861%        | 52.353 | -2.297   | -4.203%        | 65.738 | -4.822   | -6.833%        | 98.244  | -12.405  | -11.211%       |
| snow              | 2        | 58.33 | -6.85    | -10.509%       | 49.094 | -5.556   | -10.167%       | 66.37  | -4.19    | -5.938%        | 86.423  | -24.226  | -21.895%       |
| frost             | 2        | 58.86 | -6.32    | -9.696%        | 49.674 | -4.976   | -9.105%        | 67.274 | -3.286   | -4.657%        | 89.41   | -21.239  | -19.195%       |
| fog               | 2        | 62.72 | -2.46    | -3.774%        | 53.005 | -1.645   | -3.010%        | 66.973 | -3.587   | -5.084%        | 106.936 | -3.713   | -3.356%        |
| brightness        | 2        | 64.53 | -0.65    | -0.997%        | 53.339 | -1.311   | -2.399%        | 70.346 | -0.214   | -0.303%        | 110.292 | -0.357   | -0.323%        |
| spatter           | 2        | 62.05 | -3.13    | -4.802%        | 51.805 | -2.845   | -5.206%        | 69.14  | -1.42    | -2.012%        | 100.694 | -9.955   | -8.997%        |
| saturate          | 2        | 60.17 | -5.01    | -7.686%        | 51.844 | -2.806   | -5.134%        | 66.93  | -3.63    | -5.145%        | 102.439 | -8.21    | -7.419%        |

  

| corruption        | severity | VQA   |          |                | GQA    |          |                | NLVR   |          |                | Caption |          |                |
|-------------------|----------|-------|----------|----------------|--------|----------|----------------|--------|----------|----------------|---------|----------|----------------|
|                   |          | Acc   | Decrease | Decrease Ratio | Acc    | Decrease | Decrease Ratio | Acc    | Decrease | Decrease Ratio | CIDer   | Decrease | Decrease Ratio |
| impulse_noise     | 3        | 61.92 | -3.26    | -5.002%        | 52.115 | -2.535   | -4.639%        | 68.882 | -1.678   | -2.378%        | 101.262 | -9.387   | -8.484%        |
| gaussian_noise    | 3        | 61.94 | -3.24    | -4.971%        | 52.011 | -2.639   | -4.828%        | 69.054 | -1.506   | -2.134%        | 102.599 | -8.05    | -7.275%        |
| shot_noise        | 3        | 62.02 | -3.16    | -4.848%        | 52.043 | -2.607   | -4.770%        | 68.509 | -2.051   | -2.907%        | 102.533 | -8.116   | -7.335%        |
| speckle_noise     | 3        | 62.41 | -2.77    | -4.250%        | 52.274 | -2.376   | -4.348%        | 68.322 | -2.238   | -3.172%        | 102.701 | -7.948   | -7.183%        |
| zoom_blur         | 3        | 53.73 | -11.45   | -17.567%       | 46.748 | -7.902   | -14.459%       | 59.351 | -11.209  | -15.885%       | 59.185  | -51.464  | -46.511%       |
| defocus_blur      | 3        | 62.0  | -3.18    | -4.879%        | 52.019 | -2.631   | -4.814%        | 69.097 | -1.463   | -2.073%        | 100.879 | -9.77    | -8.829%        |
| motion_blur       | 3        | 61.81 | -3.37    | -5.170%        | 52.306 | -2.344   | -4.290%        | 69.212 | -1.348   | -1.910%        | 98.188  | -12.461  | -11.262%       |
| glass_blur        | 3        | 58.58 | -6.6     | -10.126%       | 49.587 | -5.063   | -9.265%        | 66.801 | -3.759   | -5.328%        | 85.895  | -24.754  | -22.372%       |
| gaussian_blur     | 3        | 62.6  | -2.58    | -3.958%        | 52.488 | -2.162   | -3.955%        | 69.183 | -1.377   | -1.951%        | 103.215 | -7.434   | -6.719%        |
| jpeg_compression  | 3        | 64.12 | -1.06    | -1.626%        | 53.26  | -1.39    | -2.544%        | 70.418 | -0.142   | -0.202%        | 108.92  | -1.729   | -1.563%        |
| contrast          | 3        | 61.76 | -3.42    | -5.247%        | 52.671 | -1.979   | -3.621%        | 68.681 | -1.879   | -2.663%        | 103.574 | -7.075   | -6.394%        |
| elastic_transform | 3        | 63.36 | -1.82    | -2.792%        | 52.735 | -1.915   | -3.504%        | 70.69  | 0.13     | 0.185%         | 104.436 | -6.213   | -5.615%        |
| pixelate          | 3        | 59.16 | -6.02    | -9.236%        | 51.264 | -3.386   | -6.196%        | 64.877 | -5.683   | -8.054%        | 88.505  | -22.144  | -20.013%       |
| snow              | 3        | 56.46 | -8.72    | -13.378%       | 48.06  | -6.59    | -12.058%       | 65.222 | -5.338   | -7.566%        | 78.153  | -32.496  | -29.369%       |
| frost             | 3        | 56.49 | -8.69    | -13.332%       | 48.529 | -6.121   | -11.200%       | 65.035 | -5.525   | -7.830%        | 79.936  | -30.713  | -27.757%       |
| fog               | 3        | 61.77 | -3.41    | -5.232%        | 52.552 | -2.098   | -3.839%        | 69.427 | -1.133   | -1.605%        | 102.982 | -7.667   | -6.929%        |
| brightness        | 3        | 63.82 | -1.36    | -2.087%        | 53.069 | -1.581   | -2.893%        | 69.6   | -0.96    | -1.361%        | 108.212 | -2.437   | -2.203%        |
| spatter           | 3        | 60.76 | -4.42    | -6.781%        | 51.208 | -3.442   | -6.297%        | 69.083 | -1.477   | -2.094%        | 94.666  | -15.983  | -14.445%       |
| saturate          | 3        | 64.6  | -0.58    | -0.890%        | 53.252 | -1.398   | -2.559%        | 71.164 | 0.604    | 0.856%         | 110.3   | -0.349   | -0.316%        |

  

| corruption        | severity | VQA   |          |                | GQA    |          |                | NLVR   |          |                | Caption |          |                |
|-------------------|----------|-------|----------|----------------|--------|----------|----------------|--------|----------|----------------|---------|----------|----------------|
|                   |          | Acc   | Decrease | Decrease Ratio | Acc    | Decrease | Decrease Ratio | Acc    | Decrease | Decrease Ratio | CIDer   | Decrease | Decrease Ratio |
| impulse_noise     | 4        | 59.55 | -5.63    | -8.638%        | 51.224 | -3.426   | -6.268%        | 67.403 | -3.157   | -4.474%        | 92.072  | -18.577  | -16.789%       |
| gaussian_noise    | 4        | 59.85 | -5.33    | -8.177%        | 51.415 | -3.235   | -5.919%        | 67.533 | -3.027   | -4.200%        | 93.879  | -16.77   | -15.156%       |
| shot_noise        | 4        | 59.33 | -5.85    | -8.975%        | 51.367 | -3.283   | -6.006%        | 66.643 | -3.917   | -5.522%        | 93.22   | -17.429  | -15.752%       |
| speckle_noise     | 4        | 60.95 | -4.23    | -6.490%        | 51.813 | -2.837   | -5.192%        | 67.504 | -3.056   | -4.331%        | 98.685  | -11.964  | -10.812%       |
| zoom_blur         | 4        | 51.84 | -13.34   | -20.466%       | 45.196 | -9.134   | -16.714%       | 57.385 | -13.175  | -18.672%       | 49.973  | -60.676  | -54.837%       |
| defocus_blur      | 4        | 60.25 | -4.93    | -7.564%        | 51.513 | -3.457   | -6.327%        | 67.604 | -2.956   | -4.189%        | 93.014  | -17.635  | -15.938%       |
| motion_blur       | 4        | 59.15 | -6.03    | -9.251%        | 51.336 | -3.314   | -6.065%        | 67.116 | -3.444   | -4.880%        | 87.102  | -23.547  | -21.281%       |
| glass_blur        | 4        | 56.62 | -8.56    | -13.133%       | 48.434 | -6.216   | -11.375%       | 65.896 | -4.664   | -6.609%        | 79.016  | -31.633  | -28.589%       |
| gaussian_blur     | 4        | 60.63 | -4.55    | -6.981%        | 51.487 | -3.163   | -5.788%        | 68.107 | -2.453   | -3.477%        | 96.555  | -14.094  | -12.738%       |
| jpeg_compression  | 4        | 63.18 | -2.0     | -3.068%        | 52.322 | -2.328   | -4.261%        | 69.858 | -0.702   | -0.995%        | 105.264 | -5.385   | -4.866%        |
| contrast          | 4        | 57.97 | -7.21    | -11.062%       | 50.413 | -4.237   | -7.752%        | 65.021 | -5.539   | -7.850%        | 91.237  | -19.412  | -17.543%       |
| elastic_transform | 4        | 61.35 | -3.83    | -5.876%        | 51.026 | -3.624   | -6.632%        | 69.614 | -0.946   | -1.341%        | 96.358  | -14.291  | -12.916%       |
| pixelate          | 4        | 55.42 | -9.76    | -14.974%       | 49.03  | -5.62    | -10.284%       | 62.179 | -8.381   | -11.878%       | 73.902  | -36.747  | -33.211%       |
| snow              | 4        | 53.26 | -11.92   | -18.288%       | 46.208 | -8.442   | -15.448%       | 62.495 | -8.065   | -11.431%       | 63.875  | -46.774  | -42.272%       |
| frost             | 4        | 55.76 | -9.42    | -14.452%       | 48.362 | -6.288   | -11.506%       | 65.25  | -5.31    | -7.525%        | 76.488  | -34.611  | -30.873%       |
| fog               | 4        | 60.5  | -4.68    | -7.180%        | 51.606 | -3.044   | -5.570%        | 68.824 | -1.736   | -2.460%        | 97.94   | -12.709  | -11.486%       |
| brightness        | 4        | 63.16 | -2.02    | -3.099%        | 52.973 | -1.677   | -3.068%        | 68.738 | -1.822   | -2.582%        | 106.695 | -3.954   | -3.574%        |
| spatter           | 4        | 58.4  | -6.78    | -10.402%       | 49.046 | -5.604   | -10.254%       | 66.901 | -3.659   | -5.186%        | 86.086  | -24.563  | -22.199%       |
| saturate          | 4        | 61.91 | -3.27    | -5.017%        | 52.234 | -2.416   | -4.421%        | 69.528 | -1.032   | -1.463%        | 103.832 | -6.817   | -6.161%        |

  

| corruption     | severity | VQA   |          |                | GQA    |          |                | NLVR   |          |                | Caption |          |                |
|----------------|----------|-------|----------|----------------|--------|----------|----------------|--------|----------|----------------|---------|----------|----------------|
|                |          | Acc   | Decrease | Decrease Ratio | Acc    | Decrease | Decrease Ratio | Acc    | Decrease | Decrease Ratio | CIDer   | Decrease | Decrease Ratio |
| impulse_noise  | 5        | 55.6  | -9.58    | -14.698%       | 49.539 | -5.111   | -9.352%        | 65.222 | -5.338   | -7.566%        | 79.968  | -30.681  | -27.728%       |
| gaussian_noise | 5        | 55.48 | -9.7     | -14.882%       | 49.292 | -5.358   | -9.803%        | 65.05  | -5.51    | -7.810%        | 79.361  | -31.288  | -28.277%       |
| shot_noise     | 5        | 56.43 | -8.75    | -13.424%       | 49.491 | -5.159   | -9.440%        | 64.863 | -5.697   | -8.074%        | 83.399  | -27.25   | -24.627%       |
| speckle_noise  | 5        | 59.19 | -5.99    | -9.190%        | 50.787 | -3.863   | -7.068%        | 65.997 | -4.563   | -6.467%        | 92.835  | -17.814  | -16.           |

Table 20: Performance and decrease ratio of Multiple Adapters on CLIP-T5 against image corruptions given severity 1 to 5.

| corruption        | severity | VQA   |          |                | GQA    |          |                | NLVR   |          |                | Caption |          |                |
|-------------------|----------|-------|----------|----------------|--------|----------|----------------|--------|----------|----------------|---------|----------|----------------|
|                   |          | Acc   | Decrease | Decrease Ratio | Acc    | Decrease | Decrease Ratio | Acc    | Decrease | Decrease Ratio | CIDer   | Decrease | Decrease Ratio |
| impulse_noise     | 1        | 64.5  | -1.65    | -2.494%        | 53.18  | -2.48    | -4.455%        | 51.801 | -0.139   | -0.267%        | 106.036 | -6.113   | -5.450%        |
| gaussian_noise    | 1        | 65.19 | -0.96    | -1.451%        | 53.315 | -2.345   | -4.213%        | 51.529 | -0.411   | -0.792%        | 108.756 | -3.393   | -3.026%        |
| shot_noise        | 1        | 65.05 | -1.1     | -1.663%        | 53.776 | -1.884   | -3.384%        | 51.414 | -0.526   | -1.013%        | 108.849 | -3.3     | -2.943%        |
| speckle_noise     | 1        | 65.12 | -1.03    | -1.557%        | 53.458 | -2.202   | -3.955%        | 51.988 | 0.048    | 0.092%         | 109.065 | -3.084   | -2.750%        |
| zoom_blur         | 1        | 59.62 | -6.53    | -9.872%        | 49.857 | -5.803   | -10.426%       | 49.792 | -2.148   | -4.136%        | 82.202  | -29.947  | -26.703%       |
| defocus_blur      | 1        | 65.27 | -0.88    | -1.330%        | 53.514 | -2.146   | -3.855%        | 51.342 | -0.598   | -1.151%        | 108.326 | -3.823   | -3.409%        |
| motion_blur       | 1        | 64.86 | -1.29    | -1.950%        | 53.22  | -2.44    | -4.384%        | 51.399 | -0.541   | -1.041%        | 107.751 | -4.398   | -3.922%        |
| glass_blur        | 1        | 65.28 | -0.87    | -1.315%        | 53.816 | -1.844   | -3.313%        | 51.873 | -0.067   | -0.129%        | 108.701 | -3.448   | -3.074%        |
| gaussian_blur     | 1        | 65.86 | -0.29    | -0.438%        | 54.055 | -1.605   | -2.884%        | 51.328 | -0.612   | -1.179%        | 110.904 | -1.245   | -1.111%        |
| jpeg_compression  | 1        | 65.69 | -0.46    | -0.695%        | 53.729 | -1.931   | -3.470%        | 52.131 | 0.191    | 0.369%         | 109.975 | -2.174   | -1.938%        |
| contrast          | 1        | 64.86 | -1.29    | -1.950%        | 53.657 | -2.003   | -3.598%        | 51.313 | -0.627   | -1.207%        | 109.128 | -3.021   | -2.694%        |
| elastic_transform | 1        | 65.38 | -0.77    | -1.164%        | 53.721 | -1.939   | -3.484%        | 52.175 | 0.235    | 0.452%         | 109.828 | -2.321   | -2.070%        |
| pixelate          | 1        | 62.76 | -3.39    | -5.125%        | 52.663 | -2.997   | -5.384%        | 51.299 | -0.641   | -1.234%        | 99.602  | -12.547  | -11.187%       |
| snow              | 1        | 61.59 | -4.56    | -6.893%        | 50.564 | -5.096   | -9.155%        | 51.457 | -0.483   | -0.930%        | 96.957  | -15.192  | -13.547%       |
| frost             | 1        | 62.46 | -3.69    | -5.578%        | 51.781 | -3.879   | -6.969%        | 51.342 | -0.598   | -1.151%        | 100.831 | -11.318  | -10.092%       |
| fog               | 1        | 64.35 | -1.8     | -2.721%        | 53.506 | -2.154   | -3.870%        | 51.012 | -0.928   | -1.787%        | 107.446 | -4.703   | -4.194%        |
| brightness        | 1        | 65.85 | -0.3     | -0.454%        | 53.641 | -2.019   | -3.627%        | 52.203 | 0.263    | 0.507%         | 111.572 | -0.577   | -0.515%        |
| spatter           | 1        | 65.64 | -0.51    | -0.771%        | 53.57  | -2.09    | -3.755%        | 52.347 | 0.407    | 0.783%         | 110.657 | -1.492   | -1.331%        |
| saturate          | 1        | 63.49 | -2.66    | -4.021%        | 52.695 | -2.965   | -5.327%        | 51.701 | -0.239   | -0.460%        | 107.388 | -4.761   | -4.245%        |
| impulse_noise     | 2        | 63.51 | -2.64    | -3.991%        | 52.759 | -2.901   | -5.212%        | 51.902 | -0.038   | -0.074%        | 103.427 | -8.722   | -7.777%        |
| gaussian_noise    | 2        | 64.45 | -1.7     | -2.570%        | 53.077 | -2.583   | -4.641%        | 51.773 | -0.167   | -0.322%        | 107.49  | -4.659   | -4.155%        |
| shot_noise        | 2        | 64.27 | -1.88    | -2.842%        | 53.244 | -2.416   | -4.341%        | 51.328 | -0.612   | -1.179%        | 106.21  | -5.939   | -5.296%        |
| speckle_noise     | 2        | 64.6  | -1.55    | -2.343%        | 53.506 | -2.154   | -3.870%        | 51.6   | -0.34    | -0.654%        | 108.274 | -3.875   | -3.455%        |
| zoom_blur         | 2        | 56.66 | -9.49    | -14.346%       | 48.06  | -7.6     | -13.654%       | 50.194 | -1.746   | -3.362%        | 66.462  | -45.687  | -40.738%       |
| defocus_blur      | 2        | 64.48 | -1.67    | -2.525%        | 52.942 | -2.718   | -4.884%        | 51.457 | -0.483   | -0.930%        | 106.226 | -5.923   | -5.281%        |
| motion_blur       | 2        | 63.68 | -2.47    | -3.734%        | 52.536 | -3.124   | -5.612%        | 52.16  | 0.22     | 0.424%         | 104.258 | -7.891   | -7.037%        |
| glass_blur        | 2        | 64.13 | -2.02    | -3.054%        | 53.212 | -2.448   | -4.398%        | 51.801 | -0.139   | -0.267%        | 104.629 | -7.52    | -6.706%        |
| gaussian_blur     | 2        | 64.83 | -1.32    | -1.995%        | 53.125 | -2.535   | -4.555%        | 51.342 | -0.598   | -1.151%        | 107.206 | -4.943   | -4.408%        |
| jpeg_compression  | 2        | 65.49 | -0.66    | -0.998%        | 53.872 | -1.788   | -3.213%        | 53.021 | 1.081    | 2.082%         | 109.446 | -2.703   | -2.410%        |
| contrast          | 2        | 63.95 | -2.2     | -3.326%        | 53.371 | -2.289   | -4.113%        | 50.696 | -1.244   | -2.395%        | 106.845 | -5.304   | -4.729%        |
| elastic_transform | 2        | 62.82 | -3.33    | -5.034%        | 51.678 | -3.982   | -7.155%        | 51.084 | -0.856   | -1.649%        | 94.903  | -17.246  | -15.378%       |
| pixelate          | 2        | 62.26 | -3.89    | -5.881%        | 52.337 | -3.323   | -5.969%        | 51.5   | -0.44    | -0.847%        | 97.551  | -14.598  | -13.017%       |
| snow              | 2        | 58.42 | -7.73    | -11.686%       | 48.911 | -6.749   | -12.126%       | 50.71  | -1.23    | -2.367%        | 84.361  | -27.788  | -24.778%       |
| frost             | 2        | 59.3  | -6.85    | -10.355%       | 49.666 | -5.994   | -10.769%       | 51.213 | -0.727   | -1.400%        | 87.72   | -24.429  | -21.783%       |
| fog               | 2        | 63.61 | -2.54    | -3.840%        | 53.244 | -2.416   | -4.341%        | 50.423 | -1.517   | -2.920%        | 106.212 | -5.937   | -5.294%        |
| brightness        | 2        | 65.43 | -0.72    | -1.088%        | 53.482 | -2.178   | -3.913%        | 52.619 | 0.679    | 1.308%         | 110.536 | -1.613   | -1.438%        |
| spatter           | 2        | 62.4  | -3.75    | -5.669%        | 52.306 | -3.354   | -6.027%        | 52.634 | 0.694    | 1.336%         | 99.537  | -12.612  | -11.246%       |
| saturate          | 2        | 60.8  | -5.35    | -8.088%        | 52.043 | -3.617   | -6.498%        | 50.782 | -1.158   | -2.229%        | 102.179 | -9.97    | -8.890%        |
| impulse_noise     | 3        | 62.57 | -3.58    | -5.412%        | 53.037 | -2.623   | -4.712%        | 51.342 | -0.598   | -1.151%        | 100.779 | -11.37   | -10.138%       |
| gaussian_noise    | 3        | 62.63 | -3.52    | -5.321%        | 52.767 | -2.893   | -5.198%        | 51.098 | -0.842   | -1.621%        | 101.76  | -10.389  | -9.264%        |
| shot_noise        | 3        | 62.71 | -3.44    | -5.200%        | 53.236 | -2.424   | -4.355%        | 50.667 | -1.273   | -2.450%        | 101.794 | -10.355  | -9.233%        |
| speckle_noise     | 3        | 62.7  | -3.45    | -5.215%        | 52.981 | -2.679   | -4.812%        | 50.596 | -1.344   | -2.588%        | 102.21  | -9.939   | -8.863%        |
| zoom_blur         | 3        | 53.95 | -12.2    | -18.443%       | 46.931 | -8.729   | -15.682%       | 50.179 | -1.761   | -3.390%        | 51.885  | -60.264  | -53.736%       |
| defocus_blur      | 3        | 62.69 | -3.46    | -5.231%        | 52.139 | -3.521   | -6.327%        | 51.414 | -0.526   | -1.013%        | 100.687 | -11.462  | -10.220%       |
| motion_blur       | 3        | 62.11 | -4.04    | -6.107%        | 52.226 | -3.434   | -6.169%        | 51.069 | -0.871   | -1.676%        | 98.529  | -13.62   | -12.145%       |
| glass_blur        | 3        | 58.93 | -7.22    | -10.915%       | 49.634 | -6.026   | -10.826%       | 50.682 | -1.258   | -2.422%        | 84.772  | -27.377  | -24.412%       |
| gaussian_blur     | 3        | 63.51 | -2.64    | -3.991%        | 52.274 | -3.386   | -6.084%        | 51.084 | -0.856   | -1.649%        | 101.916 | -10.233  | -9.125%        |
| jpeg_compression  | 3        | 65.16 | -0.99    | -1.497%        | 53.848 | -1.812   | -3.256%        | 52.663 | 0.723    | 1.391%         | 109.852 | -2.297   | -2.048%        |
| contrast          | 3        | 62.71 | -3.44    | -5.200%        | 52.568 | -3.092   | -5.555%        | 50.208 | -1.732   | -3.334%        | 103.41  | -8.739   | -7.792%        |
| elastic_transform | 3        | 64.32 | -1.83    | -2.766%        | 52.878 | -2.782   | -4.998%        | 51.514 | -0.426   | -0.820%        | 104.531 | -7.618   | -6.793%        |
| pixelate          | 3        | 60.13 | -6.02    | -9.101%        | 51.526 | -4.134   | -7.426%        | 50.782 | -1.158   | -2.229%        | 87.638  | -24.511  | -21.855%       |
| snow              | 3        | 56.64 | -9.51    | -14.376%       | 47.941 | -7.719   | -13.868%       | 50.022 | -1.918   | -3.694%        | 76.498  | -35.651  | -31.789%       |
| frost             | 3        | 57.14 | -9.01    | -13.621%       | 48.625 | -7.035   | -12.640%       | 51.256 | -0.684   | -1.317%        | 76.995  | -35.154  | -31.346%       |
| fog               | 3        | 62.53 | -3.62    | -5.472%        | 52.862 | -2.798   | -5.027%        | 50.926 | -1.014   | -1.953%        | 102.556 | -9.593   | -8.554%        |
| brightness        | 3        | 64.65 | -1.5     | -2.268%        | 53.395 | -2.265   | -4.070%        | 52.505 | 0.565    | 1.087%         | 108.24  | -3.909   | -3.486%        |
| spatter           | 3        | 61.0  | -5.15    | -7.785%        | 51.256 | -4.404   | -7.912%        | 52.548 | 0.608    | 1.170%         | 93.794  | -18.355  | -16.366%       |
| saturate          | 3        | 65.26 | -0.89    | -1.345%        | 53.156 | -2.504   | -4.498%        | 52.878 | 0.938    | 1.806%         | 110.132 | -2.017   | -1.799%        |
| impulse_noise     | 4        | 59.82 | -6.33    | -9.569%        | 51.757 | -3.903   | -7.012%        | 50.553 | -1.387   | -2.671%        | 91.794  | -20.355  | -18.150%       |
| gaussian_noise    | 4        | 60.12 | -6.03    | -9.116%        | 51.455 | -4.205   | -7.555%        | 51.17  | -0.77    | -1.483%        | 93.233  | -18.916  | -16.867%       |
| shot_noise        | 4        | 59.75 | -6.4     | -9.675%        | 51.193 | -4.467   | -8.026%        | 50.825 | -1.115   | -2.146%        | 90.816  | -21.333  | -19.022%       |
| speckle_noise     | 4        | 61.49 | -4.66    | -7.045%        | 52.369 | -3.291   | -5.912%        | 50.61  | -1.33    | -2.561%        | 98.103  | -14.046  | -12.524%       |
| zoom_blur         | 4        | 52.17 | -13.98   | -21.134%       | 45.254 | -10.406  | -18.696%       | 49.892 | -2.048   | -3.942%        | 42.244  | -69.905  | -62.333%       |
| defocus_blur      | 4        | 60.84 | -5.31    | -8.027%        | 51.034 | -4.626   | -8.312%        | 50.754 | -1.186   | -2.284%        | 93.41   | -18.739  | -16.709%       |
| motion_blur       | 4        | 59.58 | -6.57    | -9.932%        | 50.294 | -5.366   | -9.640%        | 50.452 | -1.488   | -2.865%        | 85.262  | -26.887  | -23.975%       |
| glass_blur        | 4        | 56.72 | -9.43    | -14.255%       | 48.434 | -7.226   | -12.983%       | 50.481 | -1.459   | -2.809%        | 75.714  | -36.435  | -32.488%       |
| gaussian_blur     | 4        | 61.6  | -4.55    | -6.878%        | 51.288 | -4.372   | -7.855%        | 50.754 | -1.186   | -2.284%        | 96.23   | -15.919  | -14.194%       |
| jpeg_compression  | 4        | 64.15 | -2.0     | -3.023%        | 53.132 | -2.528   | -4.541%        | 52.332 | 0.392    | 0.756%         | 104.967 | -7.182   | -6.404%        |
| contrast          | 4        | 58.4  | -7.75    | -11.716%       | 50.668 | -4.992   | -8.969%        | 50.179 | -1.761   | -3.390%        | 88.829  | -23.32   | -20.794%       |
| elastic_transform | 4        | 62.01 | -4.14    | -6.259%        | 51.344 | -4.316   | -7.755%        | 51.285 | -0.655   | -1.262%        | 95.188  | -16.961  | -15.124%       |
| pixelate          | 4        | 55.87 | -10.28   | -15.540%       | 48.72  | -6.94    | -12.469%       | 50.309 | -1.631   | -3.141%        | 72.813  | -39.336  | -35.075%       |
| snow              | 4        | 53.57 | -12.58   | -19.017%       | 46.049 | -6.911   | -17.268%       | 49.878 | -2.062   | -3.970%        | 61.826  | -50.323  | -44.871%       |
| frost             | 4        | 56.21 | -9.94    | -15.026%       | 47.925 | -7.735   | -13.897%       | 51.543 | -0.397   | -0.764%        | 75.086  | -37.063  | -33.048%       |
| fog               | 4        | 60.89 | -5.26    | -7.952%        | 51.352 | -4.308   | -7.741%        | 51.141 | -0.799   | -1.538%        | 96.996  | -15.153  | -13.511%       |
| brightness        | 4        | 63.58 | -2.57    | -3.885%        | 53.252 | -2.408   | -4.327%        | 52.849 | 0.909    | 1.750%         | 105.744 | -6.405   | -5.711%        |
| spatter           | 4        | 58.63 | -7.52    | -11.368%       | 49.674 | -5.986   | -10.755%       | 52.261 | 0.321    | 0.617%         | 83.306  | -28.843  | -25.718%       |
| saturate          | 4        | 62.69 | -3.46    | -5.231%        | 51.932 | -3.728   | -6.698%        | 51.844 | -0.096   | -0.184%        | 103.63  | -8.519   | -7.596%        |
| impulse_noise     | 5        | 56.02 | -10.13   | -15.314%       | 49.412 | -6.248   | -11.226%       | 50.007 | -1.933   | -3.721%        | 79.067  | -33.082  | -29.499%       |
| gaussian_noise    | 5        | 56.02 | -10.13   | -15.314%       | 49.507 | -6.153   | -11.054%       | 50.409 | -1.531   | -2.947%        | 78.336  | -33.813  | -30.150%       |
| shot_noise        | 5        | 57.09 | -9.06    | -13.696%       | 49.905 | -5.755   | -10.340%       | 49.806 | -2.134   | -4.108%        | 82.044  | -30.105  | -26.844%       |
| speckle_noise     | 5        | 59.79 | -6.36    | -9.615%        | 51.511 | -4.149   | -7.455%        | 50.538 | -1.402   | -2.699%        | 91.293  | -20.856  | -18.597%       |
| zoom_blur         | 5        | 50.23 | -15.92   | -24.067%       | 44.188 | -11.472  | -20.610%       | 49.835 | -2.105   | -4.053%        | 33.035  | -79.114  | -70.544%       |
| defocus_blur      | 5        | 58.89 | -7.26    | -10.975%       | 50.04  | -5.62    | -10.097%       | 50.553 | -1.387   | -2.671%        | 83.47   | -28.679  | -25.572%       |
| motion_blur       | 5        | 57.25 | -8.9     | -13.454%       | 48.903 | -6.757   | -12.140%       | 50.395 | -1.545   | -2.975%        | 73.385  | -38.764  | -34.565%       |
| glass_blur        | 5        | 54.04 | -12.11   | -18.307%       | 46.478 | -9.182   | -16.497%       | 50.237 | -1.703   | -3.279%        | 63.347  | -48.802  | -43.515%       |
| gaussian_blur     | 5        | 57.69 | -8.46    | -12.789%       | 49.316 | -6.344   | -11.397%       | 50.022 | -1.918   | -3.694%        | 81.731  | -30.418  | -27.123%       |
| jpeg_compression  | 5        | 61.83 | -4.32    |                |        |          |                |        |          |                |         |          |                |

Table 21: Performance and decrease ratio of Multiple Compacters on CLIP-T5 against image corruptions given severity 1 to 5.

| corruption        | severity | VQA   |          |                | GQA    |          |                | NLVR   |          |                | Caption |          |                |
|-------------------|----------|-------|----------|----------------|--------|----------|----------------|--------|----------|----------------|---------|----------|----------------|
|                   |          | Acc   | Decrease | Decrease Ratio | Acc    | Decrease | Decrease Ratio | Acc    | Decrease | Decrease Ratio | CIDer   | Decrease | Decrease Ratio |
| impulse_noise     | 1        | 63.83 | -1.67    | -2.550%        | 52.027 | -2.653   | -4.851%        | 52.131 | -0.499   | -0.947%        | 106.519 | -6.681   | -5.902%        |
| gaussian_noise    | 1        | 64.54 | -0.96    | -1.466%        | 52.552 | -2.128   | -3.892%        | 52.591 | -0.039   | -0.075%        | 109.611 | -3.589   | -3.171%        |
| shot_noise        | 1        | 64.48 | -1.02    | -1.557%        | 52.441 | -2.239   | -4.095%        | 52.318 | -0.312   | -0.593%        | 109.51  | -3.69    | -3.259%        |
| speckle_noise     | 1        | 64.25 | -1.25    | -1.908%        | 52.441 | -2.239   | -4.095%        | 52.002 | -0.628   | -1.193%        | 110.284 | -2.916   | -2.576%        |
| zoom_blur         | 1        | 58.87 | -6.63    | -10.122%       | 49.73  | -4.95    | -9.053%        | 49.347 | -3.283   | -6.238%        | 84.89   | -28.31   | -25.009%       |
| defocus_blur      | 1        | 64.57 | -0.93    | -1.420%        | 53.101 | -1.579   | -2.888%        | 51.988 | -0.642   | -1.220%        | 109.512 | -3.688   | -3.258%        |
| motion_blur       | 1        | 64.0  | -1.5     | -2.290%        | 52.806 | -1.874   | -3.426%        | 52.232 | -0.398   | -0.756%        | 108.307 | -4.893   | -4.322%        |
| glass_blur        | 1        | 64.57 | -0.93    | -1.420%        | 52.759 | -1.921   | -3.514%        | 51.931 | -0.699   | -1.329%        | 108.766 | -4.434   | -3.917%        |
| gaussian_blur     | 1        | 64.93 | -0.57    | -0.870%        | 53.323 | -1.357   | -2.481%        | 52.002 | -0.628   | -1.193%        | 112.114 | -1.086   | -0.960%        |
| jpeg_compression  | 1        | 65.01 | -0.49    | -0.748%        | 53.156 | -1.524   | -2.787%        | 52.304 | -0.326   | -0.620%        | 111.194 | -2.006   | -1.772%        |
| contrast          | 1        | 64.1  | -1.4     | -2.137%        | 53.101 | -1.579   | -2.888%        | 52.045 | -0.585   | -1.111%        | 109.412 | -3.788   | -3.346%        |
| elastic_transform | 1        | 64.83 | -0.67    | -1.023%        | 53.252 | -1.428   | -2.612%        | 52.505 | -0.125   | -0.238%        | 109.741 | -3.459   | -3.056%        |
| pixelate          | 1        | 62.37 | -3.13    | -4.779%        | 51.908 | -2.772   | -5.069%        | 51.572 | -1.058   | -2.011%        | 100.87  | -12.33   | -10.892%       |
| snow              | 1        | 60.82 | -4.68    | -7.145%        | 50.644 | -4.036   | -7.381%        | 51.026 | -1.604   | -3.047%        | 96.456  | -16.744  | -14.792%       |
| frost             | 1        | 62.08 | -3.42    | -5.221%        | 50.811 | -3.869   | -7.076%        | 51.715 | -0.915   | -1.738%        | 101.172 | -12.028  | -10.626%       |
| fog               | 1        | 63.61 | -1.89    | -2.885%        | 53.101 | -1.579   | -2.888%        | 51.041 | -1.589   | -3.020%        | 109.137 | -4.063   | -3.590%        |
| brightness        | 1        | 65.15 | -0.35    | -0.534%        | 53.061 | -1.619   | -2.961%        | 53.208 | 0.578    | 1.098%         | 111.696 | -1.504   | -1.329%        |
| spatter           | 1        | 64.88 | -0.62    | -0.947%        | 53.029 | -1.651   | -3.019%        | 53.151 | 0.521    | 0.989%         | 111.11  | -2.09    | -1.847%        |
| saturate          | 1        | 62.75 | -2.75    | -4.198%        | 52.735 | -1.945   | -3.557%        | 52.332 | -0.298   | -0.565%        | 107.965 | -5.235   | -4.624%        |

  

| corruption        | severity | VQA   |          |                | GQA    |          |                | NLVR   |          |                | Caption |          |                |
|-------------------|----------|-------|----------|----------------|--------|----------|----------------|--------|----------|----------------|---------|----------|----------------|
|                   |          | Acc   | Decrease | Decrease Ratio | Acc    | Decrease | Decrease Ratio | Acc    | Decrease | Decrease Ratio | CIDer   | Decrease | Decrease Ratio |
| impulse_noise     | 2        | 62.82 | -2.68    | -4.092%        | 51.98  | -2.7     | -4.938%        | 51.414 | -1.216   | -2.311%        | 103.863 | -9.337   | -8.248%        |
| gaussian_noise    | 2        | 63.86 | -1.64    | -2.504%        | 52.298 | -2.382   | -4.357%        | 52.203 | -0.427   | -0.811%        | 107.057 | -6.143   | -5.427%        |
| shot_noise        | 2        | 63.57 | -1.93    | -2.947%        | 52.139 | -2.541   | -4.648%        | 51.529 | -1.101   | -2.093%        | 107.056 | -6.144   | -5.427%        |
| speckle_noise     | 2        | 64.04 | -1.46    | -2.229%        | 52.306 | -2.374   | -4.342%        | 51.744 | -0.886   | -1.684%        | 108.473 | -4.727   | -4.176%        |
| zoom_blur         | 2        | 56.43 | -9.07    | -13.847%       | 47.822 | -6.858   | -12.543%       | 50.079 | -2.551   | -4.847%        | 70.125  | -43.075  | -38.052%       |
| defocus_blur      | 2        | 63.95 | -1.55    | -2.366%        | 52.616 | -2.064   | -3.775%        | 51.83  | -0.8     | -1.520%        | 107.444 | -5.756   | -5.085%        |
| motion_blur       | 2        | 63.53 | -1.97    | -3.008%        | 52.663 | -2.017   | -3.688%        | 51.715 | -0.915   | -1.738%        | 105.411 | -7.789   | -6.881%        |
| glass_blur        | 2        | 63.33 | -2.17    | -3.313%        | 52.155 | -2.525   | -4.619%        | 51.227 | -1.403   | -2.665%        | 104.253 | -8.947   | -7.904%        |
| gaussian_blur     | 2        | 64.19 | -1.31    | -2.000%        | 52.83  | -1.85    | -3.383%        | 51.974 | -0.656   | -1.247%        | 108.266 | -4.934   | -4.359%        |
| jpeg_compression  | 2        | 64.85 | -0.65    | -0.992%        | 52.902 | -1.778   | -3.252%        | 52.591 | -0.039   | -0.075%        | 110.117 | -3.083   | -2.723%        |
| contrast          | 2        | 63.29 | -2.21    | -3.374%        | 52.735 | -1.945   | -3.557%        | 51.199 | -1.431   | -2.720%        | 107.708 | -5.492   | -4.852%        |
| elastic_transform | 2        | 62.2  | -3.3     | -5.038%        | 51.344 | -3.336   | -6.102%        | 51.184 | -1.446   | -2.747%        | 95.894  | -17.306  | -15.288%       |
| pixelate          | 2        | 61.61 | -3.89    | -5.939%        | 51.272 | -3.408   | -6.233%        | 50.94  | -1.69    | -3.211%        | 97.593  | -15.607  | -13.787%       |
| snow              | 2        | 57.96 | -7.54    | -11.511%       | 48.784 | -5.896   | -10.783%       | 50.108 | -2.522   | -4.793%        | 85.904  | -27.296  | -24.113%       |
| frost             | 2        | 59.01 | -6.49    | -9.908%        | 49.372 | -5.308   | -9.708%        | 50.696 | -1.934   | -3.674%        | 89.042  | -24.158  | -21.341%       |
| fog               | 2        | 62.92 | -2.58    | -3.939%        | 52.655 | -2.025   | -3.703%        | 50.983 | -1.647   | -3.129%        | 107.793 | -5.407   | -4.777%        |
| brightness        | 2        | 64.53 | -0.97    | -1.481%        | 52.465 | -2.215   | -4.052%        | 53.179 | 0.549    | 1.044%         | 110.353 | -2.847   | -2.515%        |
| spatter           | 2        | 61.78 | -3.72    | -5.679%        | 51.439 | -3.241   | -5.927%        | 52.749 | 0.119    | 0.225%         | 100.432 | -12.768  | -11.279%       |
| saturate          | 2        | 60.44 | -5.06    | -7.725%        | 51.892 | -2.788   | -5.098%        | 51.557 | -1.073   | -2.038%        | 103.452 | -9.748   | -8.611%        |

  

| corruption        | severity | VQA   |          |                | GQA    |          |                | NLVR   |          |                | Caption |          |                |
|-------------------|----------|-------|----------|----------------|--------|----------|----------------|--------|----------|----------------|---------|----------|----------------|
|                   |          | Acc   | Decrease | Decrease Ratio | Acc    | Decrease | Decrease Ratio | Acc    | Decrease | Decrease Ratio | CIDer   | Decrease | Decrease Ratio |
| impulse_noise     | 3        | 62.09 | -3.41    | -5.206%        | 51.137 | -3.543   | -6.480%        | 51.17  | -1.46    | -2.774%        | 100.455 | -12.745  | -11.259%       |
| gaussian_noise    | 3        | 62.37 | -3.13    | -4.779%        | 51.654 | -3.026   | -5.335%        | 51.658 | -0.972   | -1.847%        | 102.564 | -10.636  | -9.395%        |
| shot_noise        | 3        | 62.27 | -3.23    | -4.931%        | 51.526 | -3.154   | -5.767%        | 50.782 | -1.848   | -3.511%        | 102.932 | -10.268  | -9.071%        |
| speckle_noise     | 3        | 62.49 | -3.01    | -4.595%        | 51.924 | -2.756   | -5.040%        | 50.71  | -1.92    | -3.647%        | 102.737 | -10.463  | -9.243%        |
| zoom_blur         | 3        | 54.03 | -11.47   | -17.511%       | 45.858 | -8.822   | -16.134%       | 49.691 | -2.939   | -5.584%        | 56.409  | -56.791  | -50.168%       |
| defocus_blur      | 3        | 62.26 | -3.24    | -4.947%        | 51.725 | -2.955   | -5.404%        | 51.055 | -1.575   | -2.993%        | 100.32  | -12.88   | -11.378%       |
| motion_blur       | 3        | 61.78 | -3.72    | -5.679%        | 51.789 | -2.891   | -5.287%        | 50.911 | -1.719   | -3.265%        | 98.305  | -14.895  | -13.159%       |
| glass_blur        | 3        | 58.83 | -6.67    | -10.183%       | 48.489 | -6.191   | -11.321%       | 49.734 | -2.896   | -5.502%        | 84.446  | -28.754  | -25.401%       |
| gaussian_blur     | 3        | 62.87 | -2.63    | -4.015%        | 51.844 | -2.836   | -5.186%        | 51.457 | -1.173   | -2.229%        | 103.333 | -9.867   | -8.716%        |
| jpeg_compression  | 3        | 64.4  | -1.1     | -1.679%        | 52.95  | -1.73    | -3.165%        | 52.175 | -0.455   | -0.865%        | 109.433 | -3.767   | -3.328%        |
| contrast          | 3        | 61.94 | -3.56    | -5.435%        | 51.495 | -3.185   | -5.825%        | 50.352 | -2.278   | -4.329%        | 104.423 | -8.777   | -7.754%        |
| elastic_transform | 3        | 63.49 | -2.01    | -3.069%        | 52.107 | -2.573   | -4.706%        | 52.49  | -0.14    | -0.265%        | 103.717 | -9.483   | -8.377%        |
| pixelate          | 3        | 59.55 | -5.95    | -9.084%        | 49.817 | -4.863   | -8.893%        | 49.935 | -2.695   | -5.120%        | 87.769  | -25.431  | -22.466%       |
| snow              | 3        | 56.35 | -9.15    | -13.969%       | 47.686 | -6.994   | -12.790%       | 49.691 | -2.939   | -5.584%        | 77.513  | -35.687  | -31.526%       |
| frost             | 3        | 56.35 | -9.15    | -13.969%       | 48.672 | -6.008   | -10.987%       | 50.093 | -2.537   | -4.820%        | 79.424  | -33.776  | -29.837%       |
| fog               | 3        | 61.76 | -3.74    | -5.710%        | 51.654 | -3.026   | -5.535%        | 50.94  | -1.69    | -3.211%        | 103.583 | -9.617   | -8.496%        |
| brightness        | 3        | 64.06 | -1.44    | -2.198%        | 52.314 | -2.366   | -4.328%        | 53.021 | 0.391    | 0.744%         | 108.785 | -4.415   | -3.900%        |
| spatter           | 3        | 60.43 | -5.07    | -7.740%        | 50.882 | -3.798   | -6.945%        | 51.73  | -0.9     | -1.711%        | 94.514  | -18.686  | -16.507%       |
| saturate          | 3        | 64.72 | -0.78    | -1.191%        | 52.52  | -2.16    | -3.950%        | 52.261 | -0.369   | -0.702%        | 110.6   | -2.6     | -2.297%        |

  

| corruption        | severity | VQA   |          |                | GQA    |          |                | NLVR   |          |                | Caption |          |                |
|-------------------|----------|-------|----------|----------------|--------|----------|----------------|--------|----------|----------------|---------|----------|----------------|
|                   |          | Acc   | Decrease | Decrease Ratio | Acc    | Decrease | Decrease Ratio | Acc    | Decrease | Decrease Ratio | CIDer   | Decrease | Decrease Ratio |
| impulse_noise     | 4        | 59.65 | -5.85    | -8.931%        | 50.016 | -4.664   | -8.530%        | 50.151 | -2.479   | -4.711%        | 92.61   | -20.50   | -18.189%       |
| gaussian_noise    | 4        | 59.74 | -5.76    | -8.794%        | 50.843 | -3.837   | -7.018%        | 50.208 | -2.422   | -4.602%        | 94.23   | -18.97   | -16.758%       |
| shot_noise        | 4        | 59.27 | -6.23    | -9.511%        | 50.867 | -3.813   | -6.974%        | 49.993 | -2.637   | -5.011%        | 92.355  | -20.845  | -18.414%       |
| speckle_noise     | 4        | 60.83 | -4.67    | -7.130%        | 50.914 | -3.766   | -6.887%        | 50.538 | -2.092   | -3.974%        | 99.668  | -14.132  | -12.484%       |
| zoom_blur         | 4        | 52.06 | -13.44   | -20.519%       | 44.959 | -9.721   | -17.777%       | 49.318 | -3.312   | -6.293%        | 47.284  | -65.916  | -58.230%       |
| defocus_blur      | 4        | 60.7  | -4.8     | -7.328%        | 51.034 | -3.646   | -6.669%        | 50.538 | -2.092   | -3.974%        | 93.104  | -20.096  | -17.752%       |
| motion_blur       | 4        | 59.24 | -6.26    | -9.557%        | 50.517 | -4.163   | -7.614%        | 50.022 | -2.608   | -4.956%        | 86.707  | -26.493  | -23.403%       |
| glass_blur        | 4        | 56.94 | -8.56    | -13.069%       | 47.853 | -6.827   | -12.485%       | 49.577 | -3.053   | -5.802%        | 76.664  | -36.536  | -32.276%       |
| gaussian_blur     | 4        | 61.12 | -4.38    | -6.687%        | 51.105 | -3.575   | -6.538%        | 50.639 | -1.991   | -3.784%        | 96.619  | -16.581  | -14.647%       |
| jpeg_compression  | 4        | 63.32 | -2.18    | -3.328%        | 52.003 | -2.677   | -4.895%        | 52.074 | -0.556   | -1.056%        | 104.365 | -8.835   | -7.804%        |
| contrast          | 4        | 58.13 | -7.37    | -11.252%       | 50.358 | -4.322   | -7.905%        | 49.304 | -3.326   | -6.320%        | 90.908  | -22.292  | -19.693%       |
| elastic_transform | 4        | 61.39 | -4.11    | -6.275%        | 50.747 | -3.933   | -7.192%        | 52.074 | -0.556   | -1.056%        | 95.498  | -17.702  | -15.638%       |
| pixelate          | 4        | 55.72 | -9.78    | -14.931%       | 47.814 | -6.866   | -12.557%       | 49.333 | -3.297   | -6.265%        | 72.144  | -41.056  | -36.269%       |
| snow              | 4        | 52.95 | -12.55   | -19.160%       | 45.858 | -8.822   | -16.134%       | 49.132 | -3.498   | -6.647%        | 63.946  | -49.254  | -43.510%       |
| frost             | 4        | 55.42 | -10.08   | -15.389%       | 47.726 | -6.954   | -12.717%       | 49.821 | -2.809   | -5.338%        | 75.2    | -38.0    | -33.568%       |
| fog               | 4        | 59.96 | -5.54    | -8.458%        | 51.487 | -3.193   | -5.840%        | 50.51  | -2.12    | -4.029%        | 98.914  | -14.286  | -12.620%       |
| brightness        | 4        | 63.05 | -2.45    | -3.740%        | 52.163 | -2.517   | -4.604%        | 52.476 | -0.154   | -0.293%        | 105.655 | -7.545   | -6.666%        |
| spatter           | 4        | 58.47 | -7.03    | -10.733%       | 49.483 | -5.197   | -9.504%        | 51.543 | -1.087   | -2.065%        | 84.696  | -28.504  | -25.181%       |
| saturate          | 4        | 61.92 | -3.58    | -5.466%        | 50.97  | -3.71    | -6.785%        | 51.658 | -0.972   | -1.847%        | 103.23  | -9.97    | -8.808%        |

  

| corruption     | severity | VQA   |          |                | GQA    |          |                | NLVR   |          |                | Caption |          |                |
|----------------|----------|-------|----------|----------------|--------|----------|----------------|--------|----------|----------------|---------|----------|----------------|
|                |          | Acc   | Decrease | Decrease Ratio | Acc    | Decrease | Decrease Ratio | Acc    | Decrease | Decrease Ratio | CIDer   | Decrease | Decrease Ratio |
| impulse_noise  | 5        | 55.86 | -9.64    | -14.718%       | 48.704 | -5.976   | -10.929%       | 49.447 | -3.183   | -6.047%        | 79.686  | -33.514  | -29.606%       |
| gaussian_noise | 5        | 55.9  | -9.6     | -14.656%       | 48.545 | -6.135   | -11.220%       | 49.218 | -3.412   | -6.483%        | 79.894  | -33.306  | -29.422%       |
| shot_noise     | 5        | 56.64 | -8.86    | -13.527%       | 49.141 | -5.539   | -10.129%       | 49.39  | -3.24    | -6.156%        | 83.068  | -30.132  | -26.618%       |
| speckle_noise  | 5        | 59.3  | -6.2     | -9.466%        | 50.31  | -4.37    | -7.992%        | 49.677 | -2.953   | -5.611%        | 9       |          |                |

Table 22: Performance and decrease ratio of Single Adapter on CLIP-T5 against image corruptions given severity 1 to 5.

| corruption        | severity | VQA   |          |                |        | GQA      |                |        |          | NLVR           |         |          |                | Caption |          |                |  |
|-------------------|----------|-------|----------|----------------|--------|----------|----------------|--------|----------|----------------|---------|----------|----------------|---------|----------|----------------|--|
|                   |          | Acc   | Decrease | Decrease Ratio | Acc    | Decrease | Decrease Ratio | Acc    | Decrease | Decrease Ratio | CIDer   | Decrease | Decrease Ratio | Acc     | Decrease | Decrease Ratio |  |
| impulse_noise     | 1        | 64.39 | -2.02    | -3.042%        | 48.179 | -7.721   | -13.812%       | 71.695 | -1.085   | -1.491%        | 106.315 | -5.385   | -4.821%        |         |          |                |  |
| gaussian_noise    | 1        | 65.09 | -1.32    | -1.988%        | 48.72  | -7.18    | -12.844%       | 72.04  | -0.74    | -1.017%        | 108.347 | -3.353   | -3.002%        |         |          |                |  |
| shot_noise        | 1        | 65.2  | -1.21    | -1.822%        | 48.776 | -7.124   | -12.745%       | 71.81  | -0.97    | -1.333%        | 108.413 | -3.287   | -2.942%        |         |          |                |  |
| speckle_noise     | 1        | 65.06 | -1.35    | -2.033%        | 48.943 | -6.957   | -12.446%       | 71.523 | -1.257   | -1.727%        | 108.565 | -3.135   | -2.807%        |         |          |                |  |
| zoom_blur         | 1        | 59.35 | -7.06    | -10.631%       | 45.54  | -10.36   | -18.533%       | 56.064 | -16.716  | -22.967%       | 84.143  | -27.557  | -24.670%       |         |          |                |  |
| defocus_blur      | 1        | 65.11 | -1.3     | -1.958%        | 48.863 | -7.037   | -12.588%       | 72.241 | -0.539   | -0.741%        | 108.171 | -3.529   | -3.159%        |         |          |                |  |
| motion_blur       | 1        | 64.88 | -1.53    | -2.304%        | 49.022 | -6.878   | -12.304%       | 71.781 | -0.999   | -1.372%        | 107.027 | -4.673   | -4.184%        |         |          |                |  |
| glass_blur        | 1        | 65.3  | -1.11    | -1.671%        | 48.895 | -7.005   | -12.531%       | 71.523 | -1.257   | -1.727%        | 108.394 | -3.306   | -2.960%        |         |          |                |  |
| gaussian_blur     | 1        | 65.94 | -0.47    | -0.708%        | 49.38  | -6.52    | -11.664%       | 72.686 | -0.094   | -0.130%        | 110.921 | -0.779   | -0.698%        |         |          |                |  |
| jpeg_compression  | 1        | 65.75 | -0.66    | -0.994%        | 49.046 | -6.854   | -12.261%       | 72.772 | -0.008   | -0.011%        | 110.094 | -1.606   | -1.437%        |         |          |                |  |
| contrast          | 1        | 65.07 | -1.34    | -2.018%        | 49.308 | -6.592   | -11.792%       | 71.638 | -1.142   | -1.569%        | 108.489 | -3.211   | -2.874%        |         |          |                |  |
| elastic_transform | 1        | 66.04 | -0.37    | -0.557%        | 48.831 | -7.069   | -12.645%       | 72.04  | -0.74    | -1.017%        | 109.629 | -2.071   | -1.854%        |         |          |                |  |
| pixelate          | 1        | 62.97 | -3.44    | -5.180%        | 48.259 | -7.641   | -13.669%       | 69.628 | -3.152   | -4.331%        | 100.7   | -11.0    | -9.848%        |         |          |                |  |
| snow              | 1        | 61.89 | -4.52    | -6.806%        | 46.613 | -9.287   | -16.613%       | 69.614 | -3.166   | -4.350%        | 97.265  | -14.435  | -12.923%       |         |          |                |  |
| frost             | 1        | 62.91 | -3.5     | -5.270%        | 47.631 | -8.269   | -14.793%       | 70.073 | -2.707   | -3.719%        | 100.419 | -11.281  | -10.100%       |         |          |                |  |
| fog               | 1        | 64.64 | -1.77    | -2.665%        | 49.197 | -6.703   | -11.991%       | 71.308 | -1.472   | -2.023%        | 106.947 | -4.753   | -4.255%        |         |          |                |  |
| brightness        | 1        | 66.13 | -0.28    | -0.422%        | 49.865 | -6.035   | -10.796%       | 72.585 | -0.195   | -0.268%        | 111.78  | 0.08     | 0.072%         |         |          |                |  |
| spatter           | 1        | 65.88 | -0.53    | -0.798%        | 49.348 | -6.552   | -11.721%       | 72.528 | -0.252   | -0.347%        | 110.277 | -1.423   | -1.274%        |         |          |                |  |
| saturate          | 1        | 63.58 | -2.83    | -4.261%        | 48.752 | -7.148   | -12.787%       | 70.848 | -1.932   | -2.654%        | 106.852 | -4.848   | -4.340%        |         |          |                |  |

  

| corruption        | severity | VQA   |          |                |        | GQA      |                |        |          | NLVR           |         |          |                | Caption |          |                |  |
|-------------------|----------|-------|----------|----------------|--------|----------|----------------|--------|----------|----------------|---------|----------|----------------|---------|----------|----------------|--|
|                   |          | Acc   | Decrease | Decrease Ratio | Acc    | Decrease | Decrease Ratio | Acc    | Decrease | Decrease Ratio | CIDer   | Decrease | Decrease Ratio | Acc     | Decrease | Decrease Ratio |  |
| impulse_noise     | 2        | 63.59 | -2.82    | -4.246%        | 47.718 | -8.182   | -14.636%       | 71.035 | -1.745   | -2.398%        | 103.652 | -8.048   | -7.205%        |         |          |                |  |
| gaussian_noise    | 2        | 64.4  | -2.01    | -3.027%        | 48.195 | -7.705   | -13.783%       | 71.595 | -1.185   | -1.629%        | 106.963 | -4.737   | -4.241%        |         |          |                |  |
| shot_noise        | 2        | 64.18 | -2.23    | -3.358%        | 48.06  | -7.84    | -14.025%       | 70.906 | -1.874   | -2.575%        | 106.358 | -5.342   | -4.783%        |         |          |                |  |
| speckle_noise     | 2        | 64.51 | -1.9     | -2.861%        | 48.696 | -7.204   | -12.887%       | 71.465 | -1.315   | -1.806%        | 108.147 | -3.553   | -3.181%        |         |          |                |  |
| zoom_blur         | 2        | 56.34 | -10.07   | -15.163%       | 43.862 | -12.038  | -21.534%       | 60.499 | -12.281  | -16.873%       | 69.331  | -42.369  | -37.931%       |         |          |                |  |
| defocus_blur      | 2        | 64.54 | -1.87    | -2.816%        | 48.402 | -7.498   | -13.413%       | 71.422 | -1.358   | -1.865%        | 106.664 | -5.036   | -4.509%        |         |          |                |  |
| motion_blur       | 2        | 64.21 | -2.2     | -3.313%        | 47.949 | -7.951   | -14.224%       | 71.796 | -0.984   | -1.353%        | 104.266 | -7.434   | -6.655%        |         |          |                |  |
| glass_blur        | 2        | 64.06 | -2.35    | -3.539%        | 48.346 | -7.554   | -13.513%       | 70.088 | -2.692   | -3.699%        | 104.132 | -7.568   | -6.776%        |         |          |                |  |
| gaussian_blur     | 2        | 64.78 | -1.63    | -2.454%        | 48.672 | -7.228   | -12.930%       | 72.111 | -0.669   | -0.919%        | 107.162 | -4.538   | -4.063%        |         |          |                |  |
| jpeg_compression  | 2        | 65.56 | -0.85    | -1.280%        | 49.141 | -6.759   | -12.091%       | 71.753 | -1.027   | -1.412%        | 108.73  | -2.97    | -2.659%        |         |          |                |  |
| contrast          | 2        | 64.61 | -1.8     | -2.710%        | 48.696 | -7.204   | -12.887%       | 70.949 | -1.831   | -2.516%        | 106.802 | -4.898   | -4.385%        |         |          |                |  |
| elastic_transform | 2        | 62.7  | -3.71    | -5.587%        | 47.217 | -8.683   | -15.532%       | 68.25  | -4.53    | -6.224%        | 95.436  | -16.264  | -14.560%       |         |          |                |  |
| pixelate          | 2        | 62.0  | -4.41    | -6.641%        | 47.559 | -8.341   | -14.921%       | 67.217 | -5.563   | -7.644%        | 97.393  | -14.307  | -12.809%       |         |          |                |  |
| snow              | 2        | 58.66 | -7.75    | -11.670%       | 45.007 | -10.893  | -19.486%       | 66.829 | -5.951   | -8.176%        | 86.253  | -25.647  | -22.961%       |         |          |                |  |
| frost             | 2        | 59.41 | -7.0     | -10.541%       | 45.182 | -10.718  | -19.173%       | 68.164 | -4.616   | -6.342%        | 88.041  | -23.659  | -21.181%       |         |          |                |  |
| fog               | 2        | 63.87 | -2.54    | -3.825%        | 48.545 | -7.355   | -13.157%       | 66.872 | -5.908   | -8.117%        | 105.731 | -5.969   | -5.344%        |         |          |                |  |
| brightness        | 2        | 65.54 | -0.87    | -1.310%        | 49.03  | -6.87    | -12.290%       | 72.083 | -0.697   | -0.958%        | 110.209 | -1.491   | -1.335%        |         |          |                |  |
| spatter           | 2        | 62.68 | -3.73    | -5.617%        | 47.241 | -8.659   | -15.490%       | 70.662 | -2.911   | -4.011%        | 100.122 | -11.578  | -10.365%       |         |          |                |  |
| saturate          | 2        | 60.78 | -5.63    | -8.478%        | 47.599 | -8.301   | -14.850%       | 68.308 | -4.472   | -6.145%        | 102.969 | -8.731   | -7.817%        |         |          |                |  |

  

| corruption        | severity | VQA   |          |                |        | GQA      |                |        |          | NLVR           |         |          |                | Caption |          |                |  |
|-------------------|----------|-------|----------|----------------|--------|----------|----------------|--------|----------|----------------|---------|----------|----------------|---------|----------|----------------|--|
|                   |          | Acc   | Decrease | Decrease Ratio | Acc    | Decrease | Decrease Ratio | Acc    | Decrease | Decrease Ratio | CIDer   | Decrease | Decrease Ratio | Acc     | Decrease | Decrease Ratio |  |
| impulse_noise     | 3        | 62.77 | -3.64    | -5.481%        | 47.663 | -8.237   | -14.736%       | 69.643 | -3.137   | -4.311%        | 101.158 | -10.542  | -9.438%        |         |          |                |  |
| gaussian_noise    | 3        | 62.75 | -3.66    | -5.511%        | 47.567 | -8.333   | -14.907%       | 69.872 | -2.908   | -3.995%        | 101.867 | -9.833   | -8.803%        |         |          |                |  |
| shot_noise        | 3        | 62.77 | -3.64    | -5.481%        | 47.607 | -8.293   | -14.836%       | 69.485 | -3.295   | -4.528%        | 101.669 | -10.031  | -8.981%        |         |          |                |  |
| speckle_noise     | 3        | 62.93 | -3.48    | -5.240%        | 47.869 | -8.031   | -14.366%       | 70.03  | -2.75    | -3.778%        | 102.022 | -9.678   | -8.664%        |         |          |                |  |
| zoom_blur         | 3        | 53.54 | -12.87   | -19.380%       | 42.161 | -13.739  | -24.578%       | 57.93  | -14.85   | -20.404%       | 56.396  | -55.304  | -49.511%       |         |          |                |  |
| defocus_blur      | 3        | 62.63 | -3.78    | -5.692%        | 47.241 | -8.659   | -15.490%       | 70.303 | -2.477   | -3.404%        | 100.458 | -11.242  | -10.064%       |         |          |                |  |
| motion_blur       | 3        | 62.53 | -3.88    | -5.842%        | 47.138 | -8.762   | -15.675%       | 70.001 | -2.779   | -3.818%        | 97.977  | -13.723  | -12.285%       |         |          |                |  |
| glass_blur        | 3        | 59.01 | -7.4     | -11.143%       | 45.023 | -10.877  | -19.458%       | 68.423 | -4.357   | -5.987%        | 84.847  | -27.213  | -24.363%       |         |          |                |  |
| gaussian_blur     | 3        | 63.39 | -3.02    | -4.548%        | 47.639 | -8.261   | -14.779%       | 70.389 | -2.391   | -3.285%        | 101.939 | -9.761   | -8.739%        |         |          |                |  |
| jpeg_compression  | 3        | 65.07 | -1.34    | -2.018%        | 49.205 | -6.695   | -11.977%       | 72.37  | -0.41    | -0.564%        | 108.003 | -3.697   | -3.310%        |         |          |                |  |
| contrast          | 3        | 62.86 | -3.55    | -5.346%        | 47.798 | -8.102   | -14.494%       | 69.944 | -2.836   | -3.897%        | 102.8   | -8.9     | -7.968%        |         |          |                |  |
| elastic_transform | 3        | 64.35 | -2.06    | -3.102%        | 48.267 | -7.633   | -13.655%       | 70.963 | -1.817   | -2.496%        | 104.007 | -7.693   | -6.887%        |         |          |                |  |
| pixelate          | 3        | 59.89 | -6.52    | -9.818%        | 46.438 | -9.462   | -16.926%       | 66.069 | -6.711   | -9.221%        | 88.354  | -23.346  | -20.901%       |         |          |                |  |
| snow              | 3        | 56.58 | -9.83    | -14.802%       | 43.775 | -12.125  | -21.691%       | 64.834 | -7.946   | -10.918%       | 78.536  | -33.164  | -29.690%       |         |          |                |  |
| frost             | 3        | 56.7  | -9.71    | -14.621%       | 43.759 | -12.141  | -21.719%       | 66.097 | -6.683   | -9.182%        | 79.485  | -32.215  | -28.841%       |         |          |                |  |
| fog               | 3        | 62.41 | -4.0     | -6.023%        | 47.631 | -8.269   | -14.793%       | 70.36  | -2.42    | -3.325%        | 103.165 | -8.535   | -7.641%        |         |          |                |  |
| brightness        | 3        | 64.99 | -1.42    | -2.138%        | 49.086 | -6.814   | -12.190%       | 71.509 | -1.271   | -1.747%        | 108.595 | -3.105   | -2.780%        |         |          |                |  |
| spatter           | 3        | 61.06 | -5.35    | -8.056%        | 46.494 | -9.406   | -16.827%       | 69.757 | -3.023   | -4.153%        | 94.485  | -17.215  | -15.412%       |         |          |                |  |
| saturate          | 3        | 65.57 | -0.84    | -1.265%        | 48.823 | -7.077   | -12.659%       | 72.255 | -0.525   | -0.721%        | 109.806 | -1.894   | -1.696%        |         |          |                |  |

  

| corruption        | severity | VQA   |          |                |        | GQA      |                |        |          | NLVR           |         |          |                | Caption |          |                |  |
|-------------------|----------|-------|----------|----------------|--------|----------|----------------|--------|----------|----------------|---------|----------|----------------|---------|----------|----------------|--|
|                   |          | Acc   | Decrease | Decrease Ratio | Acc    | Decrease | Decrease Ratio | Acc    | Decrease | Decrease Ratio | CIDer   | Decrease | Decrease Ratio | Acc     | Decrease | Decrease Ratio |  |
| impulse_noise     | 4        | 60.08 | -6.33    | -9.532%        | 46.629 | -9.271   | -16.585%       | 67.92  | -4.86    | -6.677%        | 91.542  | -20.158  | -18.047%       |         |          |                |  |
| gaussian_noise    | 4        | 60.52 | -5.89    | -8.669%        | 46.669 | -9.231   | -16.514%       | 67.92  | -4.86    | -6.677%        | 93.698  | -18.002  | -16.117%       |         |          |                |  |
| shot_noise        | 4        | 59.86 | -6.55    | -9.863%        | 46.43  | -9.47    | -16.940%       | 66.858 | -5.922   | -8.137%        | 92.268  | -19.432  | -17.397%       |         |          |                |  |
| speckle_noise     | 4        | 61.76 | -6.65    | -7.002%        | 47.368 | -8.532   | -15.262%       | 68.121 | -4.659   | -6.401%        | 97.948  | -13.752  | -12.311%       |         |          |                |  |
| zoom_blur         | 4        | 51.82 | -14.59   | -21.970%       | 40.491 | -15.409  | -27.565%       | 56.294 | -16.486  | -22.652%       | 45.757  | -65.943  | -59.036%       |         |          |                |  |
| defocus_blur      | 4        | 60.99 | -5.42    | -8.161%        | 46.343 | -9.557   | -17.097%       | 68.121 | -4.659   | -6.401%        | 92.304  | -19.396  | -17.364%       |         |          |                |  |
| motion_blur       | 4        | 59.72 | -6.69    | -10.074%       | 45.818 | -10.082  | -18.036%       | 67.016 | -5.764   | -7.920%        | 86.089  | -25.611  | -22.928%       |         |          |                |  |
| glass_blur        | 4        | 57.15 | -9.26    | -13.944%       | 43.401 | -12.499  | -22.359%       | 67.303 | -5.477   | -7.525%        | 77.581  | -34.119  | -30.545%       |         |          |                |  |
| gaussian_blur     | 4        | 61.56 | -4.85    | -7.303%        | 46.661 | -9.239   | -16.528%       | 69.212 | -3.568   | -4.902%        | 95.388  | -16.312  | -14.603%       |         |          |                |  |
| jpeg_compression  | 4        | 64.02 | -2.39    | -3.599%        | 48.227 | -7.673   | -13.726%       | 70.777 | -2.003   | -2.753%        | 104.095 | -7.605   | -6.808%        |         |          |                |  |
| contrast          | 4        | 58.47 | -7.94    | -11.956%       | 45.5   | -10.4    | -18.605%       | 65.121 | -7.659   | -10.523%       | 90.667  | -21.033  | -18.830%       |         |          |                |  |
| elastic_transform | 4        | 62.24 | -4.17    | -6.279%        | 46.542 | -9.358   | -16.741%       | 71.107 | -1.673   | -2.299%        | 95.638  | -16.062  | -14.380%       |         |          |                |  |
| pixelate          | 4        | 55.85 | -10.56   | -15.901%       | 44.141 | -11.759  | -21.037%       | 61.461 | -11.319  | -15.552%       | 72.151  | -39.549  | -35.406%       |         |          |                |  |
| snow              | 4        | 53.48 | -12.93   | -19.470%       | 41.207 | -14.693  | -26.285%       | 62.71  | -10.07   | -13.836%       | 63.568  | -48.132  | -43.090%       |         |          |                |  |
| frost             | 4        | 55.96 | -10.45   | -15.736%       | 43.512 | -12.388  | -22.160%       | 65.767 | -7.013   | -9.636%        | 76.794  | -34.906  | -31.250%       |         |          |                |  |
| fog               | 4        | 61.0  | -5.41    | -8.146%        | 46.677 | -9.223   | -16.500%       | 69.427 | -3.353   | -4.607%        | 97.95   | -13.75   | -12.310%       |         |          |                |  |
| brightness        | 4        | 64.03 | -2.38    | -3.584%        | 48.489 | -7.411   | -13.257%       | 70.518 | -2.262   | -3.108%        | 106.423 | -5.277   | -4.724%        |         |          |                |  |
| spatter           | 4        | 58.95 | -7.46    | -11.233%       | 44.514 | -11.386  | -20.368%       | 67.26  | -5.52    | -7.585%        | 85.064  | -26.636  | -23.846%       |         |          |                |  |
| saturate          | 4        | 62.76 | -3.65    | -5.496%        | 47.122 | -8.778   | -15.703%       | 69.528 | -3.252   | -4.469%        | 103.783 | -7.917   | -7.088%        |         |          |                |  |

  

| corruption     | severity | VQA   |          |                |        | GQA      |                |        |          | NLVR           |        |          |                | Caption |          |                |  |
|----------------|----------|-------|----------|----------------|--------|----------|----------------|--------|----------|----------------|--------|----------|----------------|---------|----------|----------------|--|
|                |          | Acc   | Decrease | Decrease Ratio | Acc    | Decrease | Decrease Ratio | Acc    | Decrease | Decrease Ratio | CIDer  | Decrease | Decrease Ratio | Acc     | Decrease | Decrease Ratio |  |
| impulse_noise  | 5        | 56.48 | -9.93    | -14.953%       | 44.657 | -11.243  | -20.112%       | 64.935 | -7.845   | -10.779%       | 78.788 | -32.912  | -29.465%       |         |          |                |  |
| gaussian_noise | 5        | 56.4  | -10.01   | -15.073%       | 43.91  | -11.99   | -21.449%       | 65.05  | -7.73    | -10.622%       | 79.632 | -32.068  | -28.709%       |         |          |                |  |
| shot_noise     | 5        | 57.21 | -9.2     | -13            |        |          |                |        |          |                |        |          |                |         |          |                |  |

Table 23: Performance and decrease ratio of Single Compacter on CLIP-T5 against image corruptions given severity 1 to 5.

| corruption        | severity | VQA   |          |                | GQA    |          |                | NLVR   |          |                | Caption |          |                |
|-------------------|----------|-------|----------|----------------|--------|----------|----------------|--------|----------|----------------|---------|----------|----------------|
|                   |          | Acc   | Decrease | Decrease Ratio | Acc    | Decrease | Decrease Ratio | Acc    | Decrease | Decrease Ratio | CIDer   | Decrease | Decrease Ratio |
| impulse_noise     | 1        | 64.34 | -1.64    | -2.486%        | 49.173 | -6.157   | -11.127%       | 70.604 | -0.866   | -1.211%        | 106.839 | -4.769   | -4.273%        |
| gaussian_noise    | 1        | 65.06 | -0.92    | -1.394%        | 49.698 | -5.632   | -10.179%       | 71.48  | 0.01     | 0.014%         | 109.21  | -2.398   | -2.148%        |
| shot_noise        | 1        | 64.69 | -1.29    | -1.955%        | 49.873 | -5.457   | -9.863%        | 71.178 | -0.292   | -0.408%        | 109.533 | -2.075   | -1.859%        |
| speckle_noise     | 1        | 65.11 | -0.87    | -1.319%        | 49.555 | -5.775   | -10.438%       | 71.006 | -0.464   | -0.649%        | 108.916 | -2.692   | -2.412%        |
| zoom_blur         | 1        | 59.27 | -6.71    | -10.170%       | 46.303 | -9.027   | -16.315%       | 56.653 | -14.817  | -20.732%       | 84.187  | -27.421  | -24.569%       |
| defocus_blur      | 1        | 64.96 | -1.02    | -1.546%        | 50.246 | -5.084   | -9.188%        | 71.523 | 0.053    | 0.074%         | 108.313 | -3.295   | -2.952%        |
| motion_blur       | 1        | 64.57 | -1.41    | -2.137%        | 50.08  | -5.25    | -9.489%        | 71.465 | -0.005   | -0.006%        | 107.603 | -4.005   | -3.589%        |
| glass_blur        | 1        | 65.0  | -0.98    | -1.485%        | 49.936 | -5.394   | -9.748%        | 71.81  | 0.34     | 0.476%         | 107.836 | -3.772   | -3.380%        |
| gaussian_blur     | 1        | 65.67 | -0.31    | -0.470%        | 50.509 | -4.821   | -8.713%        | 72.154 | 0.684    | 0.958%         | 110.363 | -1.245   | -1.116%        |
| jpeg_compression  | 1        | 65.33 | -0.65    | -0.985%        | 49.865 | -5.465   | -9.877%        | 71.695 | 0.225    | 0.315%         | 110.22  | -1.388   | -1.244%        |
| contrast          | 1        | 64.47 | -1.51    | -2.289%        | 49.897 | -5.433   | -9.820%        | 71.293 | -0.177   | -0.247%        | 109.325 | -2.283   | -2.046%        |
| elastic_transform | 1        | 65.56 | -0.42    | -0.637%        | 50.461 | -4.869   | -8.800%        | 70.92  | -0.55    | -0.769%        | 109.553 | -2.055   | -1.842%        |
| pixelate          | 1        | 62.55 | -3.43    | -5.199%        | 49.078 | -6.252   | -11.300%       | 69.255 | -2.215   | -3.099%        | 99.334  | -12.774  | -10.997%       |
| snow              | 1        | 61.8  | -4.18    | -6.335%        | 47.233 | -8.097   | -14.634%       | 69.356 | -2.114   | -2.959%        | 98.235  | -13.373  | -11.982%       |
| frost             | 1        | 62.99 | -2.99    | -4.532%        | 48.275 | -7.055   | -12.751%       | 69.7   | -1.77    | -2.477%        | 101.553 | -10.055  | -9.009%        |
| fog               | 1        | 64.06 | -1.92    | -2.910%        | 49.014 | -6.316   | -11.415%       | 71.107 | -0.363   | -0.508%        | 108.101 | -3.507   | -3.142%        |
| brightness        | 1        | 65.77 | -0.21    | -0.318%        | 50.342 | -4.988   | -9.015%        | 72.269 | 0.799    | 1.118%         | 111.312 | -0.296   | -0.265%        |
| spatter           | 1        | 65.54 | -0.44    | -0.667%        | 50.358 | -4.972   | -8.987%        | 71.867 | 0.397    | 0.556%         | 110.781 | -0.827   | -0.741%        |
| saturate          | 1        | 63.23 | -2.75    | -4.168%        | 49.125 | -6.205   | -11.214%       | 69.858 | -1.612   | -2.256%        | 108.422 | -3.186   | -2.855%        |

  

| corruption        | severity | VQA   |          |                | GQA    |          |                | NLVR   |          |                | Caption |          |                |
|-------------------|----------|-------|----------|----------------|--------|----------|----------------|--------|----------|----------------|---------|----------|----------------|
|                   |          | Acc   | Decrease | Decrease Ratio | Acc    | Decrease | Decrease Ratio | Acc    | Decrease | Decrease Ratio | CIDer   | Decrease | Decrease Ratio |
| impulse_noise     | 2        | 63.37 | -2.61    | -3.956%        | 48.156 | -7.174   | -12.967%       | 69.815 | -1.655   | -2.316%        | 103.597 | -8.011   | -7.178%        |
| gaussian_noise    | 2        | 64.15 | -1.83    | -2.774%        | 48.951 | -6.379   | -11.530%       | 70.604 | -0.866   | -1.211%        | 106.617 | -4.991   | -4.472%        |
| shot_noise        | 2        | 64.11 | -1.87    | -2.834%        | 48.648 | -6.682   | -12.076%       | 70.375 | -1.095   | -1.533%        | 106.087 | -5.521   | -4.947%        |
| speckle_noise     | 2        | 64.47 | -1.51    | -2.289%        | 49.499 | -5.831   | -10.538%       | 70.446 | -1.024   | -1.432%        | 107.824 | -3.784   | -3.391%        |
| zoom_blur         | 2        | 56.25 | -9.73    | -14.747%       | 43.616 | -11.714  | -21.171%       | 61.246 | -10.224  | -14.305%       | 69.493  | -42.115  | -37.735%       |
| defocus_blur      | 2        | 64.31 | -1.67    | -2.531%        | 49.841 | -5.489   | -9.920%        | 70.848 | -0.622   | -0.870%        | 106.883 | -4.725   | -4.234%        |
| motion_blur       | 2        | 63.87 | -2.11    | -3.198%        | 49.404 | -5.926   | -10.711%       | 71.193 | -0.277   | -0.388%        | 104.626 | -6.982   | -6.256%        |
| glass_blur        | 2        | 63.92 | -2.06    | -3.122%        | 48.744 | -6.586   | -11.903%       | 70.418 | -1.052   | -1.472%        | 105.046 | -6.562   | -5.879%        |
| gaussian_blur     | 2        | 64.76 | -1.22    | -1.849%        | 49.849 | -5.481   | -9.906%        | 71.465 | -0.005   | -0.006%        | 108.204 | -3.404   | -3.050%        |
| jpeg_compression  | 2        | 65.31 | -0.67    | -1.015%        | 49.777 | -5.553   | -10.035%       | 71.394 | -0.076   | -0.107%        | 109.696 | -1.912   | -1.713%        |
| contrast          | 2        | 63.99 | -1.99    | -3.016%        | 49.531 | -5.799   | -10.481%       | 70.332 | -1.138   | -1.593%        | 107.232 | -4.376   | -3.921%        |
| elastic_transform | 2        | 62.63 | -3.35    | -5.077%        | 48.124 | -7.206   | -13.024%       | 67.906 | -3.564   | -4.987%        | 95.87   | -15.738  | -14.101%       |
| pixelate          | 2        | 61.75 | -4.23    | -6.411%        | 48.378 | -6.952   | -12.564%       | 66.327 | -5.143   | -7.196%        | 98.188  | -13.42   | -12.024%       |
| snow              | 2        | 59.0  | -6.98    | -10.579%       | 44.999 | -10.331  | -18.671%       | 66.944 | -4.526   | -6.332%        | 86.967  | -22.641  | -22.078%       |
| frost             | 2        | 59.47 | -6.51    | -9.867%        | 46.057 | -9.273   | -16.760%       | 67.604 | -3.866   | -5.409%        | 89.402  | -22.206  | -19.897%       |
| fog               | 2        | 63.53 | -2.45    | -3.713%        | 49.11  | -6.22    | -11.242%       | 67.274 | -4.196   | -5.871%        | 106.995 | -4.613   | -4.133%        |
| brightness        | 2        | 65.24 | -0.74    | -1.122%        | 49.849 | -5.481   | -9.906%        | 72.068 | 0.598    | 0.837%         | 109.509 | -2.099   | -1.881%        |
| spatter           | 2        | 62.55 | -3.43    | -5.199%        | 47.845 | -7.485   | -13.527%       | 70.59  | -0.88    | -1.231%        | 101.615 | -9.933   | -8.954%        |
| saturate          | 2        | 60.67 | -5.31    | -8.048%        | 48.06  | -7.27    | -13.139%       | 68.38  | -3.09    | -4.324%        | 103.972 | -7.636   | -6.842%        |

  

| corruption        | severity | VQA   |          |                | GQA    |          |                | NLVR   |          |                | Caption |          |                |
|-------------------|----------|-------|----------|----------------|--------|----------|----------------|--------|----------|----------------|---------|----------|----------------|
|                   |          | Acc   | Decrease | Decrease Ratio | Acc    | Decrease | Decrease Ratio | Acc    | Decrease | Decrease Ratio | CIDer   | Decrease | Decrease Ratio |
| impulse_noise     | 3        | 62.57 | -3.41    | -5.168%        | 48.235 | -7.095   | -12.823%       | 68.81  | -2.66    | -3.722%        | 101.344 | -10.264  | -9.196%        |
| gaussian_noise    | 3        | 62.38 | -3.6     | -5.456%        | 47.949 | -7.381   | -13.340%       | 69.456 | -2.014   | -2.818%        | 102.499 | -9.109   | -8.162%        |
| shot_noise        | 3        | 62.61 | -3.37    | -5.108%        | 48.362 | -6.968   | -12.593%       | 69.068 | -2.402   | -3.360%        | 102.088 | -9.52    | -8.530%        |
| speckle_noise     | 3        | 62.73 | -3.25    | -4.926%        | 48.585 | -6.745   | -12.191%       | 69.499 | -1.971   | -2.758%        | 101.562 | -10.046  | -9.001%        |
| zoom_blur         | 3        | 53.24 | -12.74   | -19.309%       | 42.686 | -12.644  | -22.853%       | 58.375 | -13.095  | -18.322%       | 55.099  | -56.509  | -50.632%       |
| defocus_blur      | 3        | 62.52 | -3.46    | -5.244%        | 48.704 | -6.626   | -11.975%       | 68.781 | -2.689   | -3.762%        | 100.846 | -10.762  | -9.643%        |
| motion_blur       | 3        | 62.18 | -3.8     | -5.759%        | 48.346 | -6.984   | -12.622%       | 69.399 | -2.071   | -2.898%        | 99.063  | -12.545  | -11.241%       |
| glass_blur        | 3        | 59.11 | -6.87    | -10.412%       | 45.723 | -9.607   | -17.364%       | 67.877 | -3.593   | -5.027%        | 85.808  | -25.8    | -23.117%       |
| gaussian_blur     | 3        | 63.2  | -2.78    | -4.213%        | 49.07  | -6.26    | -11.314%       | 69.729 | -1.741   | -2.436%        | 102.557 | -9.051   | -8.109%        |
| jpeg_compression  | 3        | 64.84 | -1.14    | -1.728%        | 50.024 | -5.306   | -9.590%        | 70.863 | -0.607   | -0.850%        | 108.493 | -3.115   | -2.791%        |
| contrast          | 3        | 62.71 | -3.27    | -4.956%        | 48.394 | -6.936   | -12.536%       | 69.212 | -2.258   | -3.159%        | 103.634 | -7.974   | -7.144%        |
| elastic_transform | 3        | 64.03 | -1.95    | -2.955%        | 48.696 | -6.634   | -11.990%       | 71.322 | -0.148   | -0.207%        | 104.616 | -6.992   | -6.265%        |
| pixelate          | 3        | 59.65 | -6.33    | -9.594%        | 47.639 | -7.691   | -13.901%       | 65.365 | -6.105   | -8.542%        | 88.857  | -22.751  | -20.385%       |
| snow              | 3        | 57.15 | -8.83    | -13.383%       | 43.974 | -11.356  | -20.525%       | 65.523 | -5.947   | -8.321%        | 79.64   | -31.968  | -28.643%       |
| frost             | 3        | 57.42 | -8.56    | -12.974%       | 44.705 | -10.625  | -19.203%       | 65.394 | -6.076   | -8.501%        | 80.379  | -31.229  | -27.981%       |
| fog               | 3        | 62.29 | -3.69    | -5.593%        | 48.418 | -6.912   | -12.493%       | 69.973 | -1.497   | -2.095%        | 103.726 | -7.882   | -7.063%        |
| brightness        | 3        | 64.73 | -1.25    | -1.895%        | 49.785 | -5.545   | -10.021%       | 70.877 | -0.593   | -0.830%        | 108.626 | -2.982   | -2.672%        |
| spatter           | 3        | 61.05 | -4.93    | -7.472%        | 47.353 | -7.977   | -14.418%       | 69.657 | -1.813   | -2.537%        | 95.073  | -16.535  | -14.815%       |
| saturate          | 3        | 65.19 | -0.79    | -1.197%        | 49.65  | -5.68    | -10.265%       | 71.796 | 0.326    | 0.456%         | 109.935 | -1.673   | -1.499%        |

  

| corruption        | severity | VQA   |          |                | GQA    |          |                | NLVR   |          |                | Caption |          |                |
|-------------------|----------|-------|----------|----------------|--------|----------|----------------|--------|----------|----------------|---------|----------|----------------|
|                   |          | Acc   | Decrease | Decrease Ratio | Acc    | Decrease | Decrease Ratio | Acc    | Decrease | Decrease Ratio | CIDer   | Decrease | Decrease Ratio |
| impulse_noise     | 4        | 59.9  | -6.08    | -9.215%        | 46.621 | -8.709   | -15.740%       | 66.915 | -4.555   | -6.373%        | 92.218  | -19.39   | -17.373%       |
| gaussian_noise    | 4        | 60.16 | -5.82    | -8.821%        | 47.166 | -8.184   | -14.792%       | 66.93  | -4.54    | -6.533%        | 92.785  | -18.823  | -16.866%       |
| shot_noise        | 4        | 59.64 | -6.34    | -9.609%        | 46.796 | -8.534   | -15.424%       | 66.485 | -4.985   | -6.975%        | 91.896  | -19.712  | -17.662%       |
| speckle_noise     | 4        | 61.51 | -4.47    | -6.775%        | 47.957 | -7.373   | -13.326%       | 68.092 | -3.378   | -4.726%        | 99.309  | -12.299  | -11.020%       |
| zoom_blur         | 4        | 51.26 | -14.72   | -22.310%       | 40.881 | -14.449  | -26.114%       | 57.055 | -14.415  | -20.170%       | 46.028  | -65.58   | -58.759%       |
| defocus_blur      | 4        | 60.91 | -5.07    | -7.684%        | 47.058 | -8.272   | -14.950%       | 67.834 | -3.636   | -5.087%        | 93.843  | -17.765  | -15.917%       |
| motion_blur       | 4        | 59.6  | -6.38    | -9.670%        | 46.661 | -8.669   | -15.668%       | 66.6   | -4.87    | -6.814%        | 86.126  | -25.482  | -22.832%       |
| glass_blur        | 4        | 56.87 | -9.11    | -13.807%       | 44.482 | -10.848  | -19.605%       | 66.528 | -4.942   | -6.915%        | 77.062  | -34.546  | -30.953%       |
| gaussian_blur     | 4        | 61.44 | -4.54    | -6.881%        | 47.694 | -7.636   | -13.800%       | 68.078 | -3.392   | -4.746%        | 96.446  | -15.162  | -13.585%       |
| jpeg_compression  | 4        | 63.77 | -2.21    | -3.349%        | 49.213 | -6.117   | -11.056%       | 70.044 | -1.426   | -1.995%        | 105.105 | -6.503   | -5.826%        |
| contrast          | 4        | 58.69 | -7.29    | -11.049%       | 46.057 | -9.273   | -16.760%       | 65.595 | -5.875   | -8.220%        | 90.592  | -21.016  | -18.830%       |
| elastic_transform | 4        | 62.05 | -3.93    | -5.956%        | 47.368 | -7.962   | -14.389%       | 69.743 | -1.727   | -2.416%        | 96.739  | -14.869  | -13.323%       |
| pixelate          | 4        | 55.86 | -10.12   | -15.338%       | 44.697 | -10.633  | -19.217%       | 61.877 | -9.593   | -13.422%       | 73.555  | -38.053  | -34.095%       |
| snow              | 4        | 53.9  | -12.08   | -18.309%       | 42.185 | -13.145  | -23.758%       | 61.964 | -9.506   | -13.301%       | 64.249  | -47.359  | -42.434%       |
| frost             | 4        | 56.09 | -9.89    | -14.989%       | 43.799 | -11.531  | -20.841%       | 64.719 | -6.751   | -9.445%        | 76.758  | -34.85   | -31.226%       |
| fog               | 4        | 60.65 | -5.33    | -8.078%        | 47.678 | -7.652   | -13.829%       | 68.423 | -3.047   | -4.264%        | 98.035  | -13.573  | -12.161%       |
| brightness        | 4        | 63.93 | -2.05    | -3.107%        | 49.388 | -5.942   | -10.740%       | 69.542 | -1.928   | -2.697%        | 105.8   | -5.808   | -5.203%        |
| spatter           | 4        | 58.78 | -7.2     | -10.912%       | 45.111 | -10.219  | -18.470%       | 66.901 | -4.569   | -6.393%        | 86.529  | -25.079  | -22.471%       |
| saturate          | 4        | 62.61 | -3.37    | -5.108%        | 48.497 | -6.833   | -12.349%       | 69.183 | -2.287   | -3.200%        | 104.089 | -7.519   | -6.737%        |

  

| corruption     | severity | VQA   |          |                | GQA    |          |                | NLVR   |          |                | Caption |          |                |
|----------------|----------|-------|----------|----------------|--------|----------|----------------|--------|----------|----------------|---------|----------|----------------|
|                |          | Acc   | Decrease | Decrease Ratio | Acc    | Decrease | Decrease Ratio | Acc    | Decrease | Decrease Ratio | CIDer   | Decrease | Decrease Ratio |
| impulse_noise  | 5        | 55.93 | -10.05   | -15.232%       | 44.3   | -11.03   | -19.936%       | 63.916 | -7.554   | -10.570%       | 79.424  | -32.184  | -28.837%       |
| gaussian_noise | 5        | 55.97 | -10.01   | -15.171%       | 44.355 | -10.975  | -19.835%       | 64.145 | -7.325   | -10.249%       | 78.576  | -33.032  | -29.596%       |
| shot_noise     | 5        | 57.1  | -8.88    | -13.459%       | 44.721 | -10.609  | -19.174%       | 64.303 | -7.167   | -10.028%       | 83.25   | -28.358  | -25.409%       |
| speckle_noise  | 5        | 59.57 |          |                |        |          |                |        |          |                |         |          |                |

Table 24: Performance and decrease ratio of Full Finetuning on CLIP-BART against text corruptions given severity 1 to 4.

| corruption          | severity | VQA   |          |                | GQA    |          |                | NLVR   |          |                |
|---------------------|----------|-------|----------|----------------|--------|----------|----------------|--------|----------|----------------|
|                     |          | Acc   | Decrease | Decrease Ratio | Acc    | Decrease | Decrease Ratio | CIDer  | Decrease | Decrease Ratio |
| ocr                 | 1.0      | 55.75 | -11.0    | -16.479%       | 44.769 | -10.271  | -18.662%       | 56.581 | -16.429  | -22.502%       |
| typos               | 1.0      | 57.86 | -8.89    | -13.318%       | 46.128 | -8.912   | -16.192%       | 70.044 | -2.966   | -4.062%        |
| keyboard            | 1.0      | 56.36 | -10.39   | -15.566%       | 44.753 | -10.287  | -18.691%       | 69.671 | -3.339   | -4.573%        |
| spell_error         | 1.0      | 57.38 | -9.37    | -14.037%       | 46.375 | -8.665   | -15.744%       | 69.915 | -3.095   | -4.239%        |
| random_char_insert  | 1.0      | 52.55 | -14.2    | -21.273%       | 36.015 | -19.025  | -34.565%       | 64.605 | -8.405   | -11.513%       |
| random_char_replace | 1.0      | 48.69 | -18.06   | -27.056%       | 32.35  | -22.69   | -41.224%       | 62.48  | -10.53   | -14.422%       |
| random_char_swap    | 1.0      | 42.09 | -24.66   | -36.944%       | 26.499 | -28.541  | -51.856%       | 58.088 | -14.922  | -20.438%       |
| random_char_delete  | 1.0      | 50.47 | -16.28   | -24.390%       | 34.982 | -20.058  | -36.443%       | 63.298 | -9.712   | -13.302%       |
| random_word_insert  | 1.0      | 66.71 | -0.04    | -0.060%        | 52.568 | -2.472   | -4.491%        | 71.308 | -1.702   | -2.332%        |
| random_word_delete  | 1.0      | 66.55 | -0.2     | -0.300%        | 53.896 | -1.144   | -2.079%        | 72.255 | -0.755   | -1.034%        |
| swap_syn_word_emb   | 1.0      | 55.57 | -11.18   | -16.749%       | 46.232 | -8.808   | -16.004%       | 67.604 | -5.406   | -7.404%        |
| swap_syn_word_net   | 1.0      | 58.71 | -8.04    | -12.045%       | 47.535 | -7.505   | -13.635%       | 70.533 | -2.477   | -3.393%        |
| random_word_swap    | 1.0      | 66.67 | -0.08    | -0.120%        | 54.071 | -0.969   | -1.761%        | 72.47  | -0.54    | -0.739%        |

  

| corruption          | severity | VQA   |          |                | GQA    |          |                | NLVR   |          |                |
|---------------------|----------|-------|----------|----------------|--------|----------|----------------|--------|----------|----------------|
|                     |          | Acc   | Decrease | Decrease Ratio | Acc    | Decrease | Decrease Ratio | CIDer  | Decrease | Decrease Ratio |
| ocr                 | 2.0      | 55.49 | -11.26   | -16.869%       | 39.998 | -15.042  | -27.328%       | 65.509 | -7.501   | -10.274%       |
| typos               | 2.0      | 56.43 | -10.32   | -15.461%       | 41.294 | -13.746  | -24.974%       | 66.241 | -6.769   | -9.272%        |
| keyboard            | 2.0      | 55.84 | -10.91   | -16.345%       | 40.022 | -15.018  | -27.285%       | 65.652 | -7.358   | -10.078%       |
| spell_error         | 2.0      | 57.18 | -9.57    | -14.337%       | 42.28  | -12.76   | -23.183%       | 66.671 | -6.339   | -8.682%        |
| random_char_insert  | 2.0      | 41.54 | -25.21   | -37.768%       | 26.101 | -28.939  | -52.578%       | 59.05  | -13.96   | -19.121%       |
| random_char_replace | 2.0      | 36.15 | -30.6    | -45.843%       | 22.404 | -32.636  | -59.295%       | 56.796 | -16.214  | -22.207%       |
| random_char_swap    | 2.0      | 32.66 | -34.09   | -51.071%       | 20.782 | -34.258  | -62.241%       | 54.816 | -18.194  | -24.920%       |
| random_char_delete  | 2.0      | 38.71 | -28.04   | -42.007%       | 25.338 | -29.702  | -53.965%       | 57.887 | -15.123  | -20.713%       |
| random_word_insert  | 2.0      | 65.25 | -1.5     | -2.247%        | 47.233 | -7.807   | -14.184%       | 68.724 | -4.286   | -5.870%        |
| random_word_delete  | 2.0      | 60.35 | -6.4     | -9.588%        | 48.434 | -6.606   | -12.003%       | 69.686 | -3.324   | -4.553%        |
| swap_syn_word_emb   | 2.0      | 55.13 | -11.62   | -17.408%       | 42.113 | -12.927  | -23.486%       | 62.94  | -10.07   | -13.793%       |
| swap_syn_word_net   | 2.0      | 57.75 | -9.0     | -13.483%       | 44.443 | -10.597  | -19.254%       | 66.557 | -6.453   | -8.839%        |
| random_word_swap    | 2.0      | 65.49 | -1.26    | -1.888%        | 51.868 | -3.172   | -5.762%        | 72.126 | -0.884   | -1.211%        |

  

| corruption          | severity | VQA   |          |                | GQA    |          |                | NLVR   |          |                |
|---------------------|----------|-------|----------|----------------|--------|----------|----------------|--------|----------|----------------|
|                     |          | Acc   | Decrease | Decrease Ratio | Acc    | Decrease | Decrease Ratio | CIDer  | Decrease | Decrease Ratio |
| ocr                 | 3.0      | 50.29 | -16.46   | -24.659%       | 31.881 | -23.159  | -42.077%       | 59.968 | -13.042  | -17.863%       |
| typos               | 3.0      | 51.4  | -15.35   | -22.996%       | 34.306 | -20.734  | -37.671%       | 63.901 | -9.109   | -12.476%       |
| keyboard            | 3.0      | 50.14 | -16.61   | -24.884%       | 31.857 | -23.183  | -42.120%       | 62.581 | -10.429  | -14.285%       |
| spell_error         | 3.0      | 51.32 | -15.43   | -23.116%       | 34.616 | -20.424  | -37.108%       | 62.753 | -10.257  | -14.049%       |
| random_char_insert  | 3.0      | 33.4  | -33.35   | -49.963%       | 21.259 | -33.781  | -61.375%       | 55.82  | -17.19   | -23.544%       |
| random_char_replace | 3.0      | 28.51 | -38.24   | -57.288%       | 18.771 | -36.269  | -65.896%       | 54.83  | -18.18   | -24.901%       |
| random_char_swap    | 3.0      | 28.26 | -38.49   | -57.663%       | 18.588 | -36.452  | -66.228%       | 51.859 | -21.151  | -28.970%       |
| random_char_delete  | 3.0      | 31.71 | -35.04   | -52.494%       | 21.021 | -34.019  | -61.808%       | 54.557 | -18.453  | -25.274%       |
| random_word_insert  | 3.0      | 63.51 | -3.24    | -4.854%        | 41.628 | -13.412  | -24.367%       | 66.341 | -6.669   | -9.134%        |
| random_word_delete  | 3.0      | 57.44 | -9.31    | -13.948%       | 43.862 | -11.178  | -20.308%       | 67.188 | -5.822   | -7.974%        |
| swap_syn_word_emb   | 3.0      | 50.7  | -16.05   | -24.045%       | 36.039 | -19.001  | -34.522%       | 59.61  | -13.4    | -18.354%       |
| swap_syn_word_net   | 3.0      | 54.09 | -12.66   | -18.966%       | 39.323 | -15.717  | -28.556%       | 64.375 | -8.635   | -11.827%       |
| random_word_swap    | 3.0      | 64.85 | -1.9     | -2.846%        | 50.024 | -5.016   | -9.114%        | 70.963 | -2.047   | -2.804%        |

  

| corruption          | severity | VQA   |          |                | GQA    |          |                | NLVR   |          |                |
|---------------------|----------|-------|----------|----------------|--------|----------|----------------|--------|----------|----------------|
|                     |          | Acc   | Decrease | Decrease Ratio | Acc    | Decrease | Decrease Ratio | CIDer  | Decrease | Decrease Ratio |
| ocr                 | 4.0      | 43.5  | -23.25   | -34.831%       | 26.88  | -28.16   | -51.162%       | 56.854 | -16.156  | -22.129%       |
| typos               | 4.0      | 43.21 | -23.54   | -35.266%       | 27.54  | -27.5    | -49.963%       | 59.925 | -13.085  | -17.922%       |
| keyboard            | 4.0      | 40.5  | -26.25   | -39.326%       | 25.298 | -29.742  | -54.037%       | 59.064 | -13.946  | -19.101%       |
| spell_error         | 4.0      | 43.0  | -23.75   | -35.581%       | 28.518 | -26.522  | -48.187%       | 58.72  | -14.29   | -19.573%       |
| random_char_insert  | 4.0      | 27.94 | -38.81   | -58.142%       | 19.145 | -35.895  | -65.217%       | 54.342 | -18.668  | -25.569%       |
| random_char_replace | 4.0      | 23.72 | -43.03   | -64.464%       | 17.427 | -37.613  | -68.337%       | 53.108 | -19.902  | -27.260%       |
| random_char_swap    | 4.0      | 26.2  | -40.55   | -60.749%       | 18.047 | -36.993  | -67.210%       | 51.514 | -21.496  | -29.442%       |
| random_char_delete  | 4.0      | 26.09 | -40.66   | -60.914%       | 18.97  | -36.07   | -65.535%       | 53.222 | -19.788  | -27.103%       |
| random_word_insert  | 4.0      | 59.59 | -7.16    | -10.727%       | 37.963 | -17.077  | -31.026%       | 65.093 | -7.917   | -10.844%       |
| random_word_delete  | 4.0      | 50.03 | -16.72   | -25.049%       | 37.987 | -17.053  | -30.983%       | 66.04  | -6.97    | -9.547%        |
| swap_syn_word_emb   | 4.0      | 46.8  | -19.95   | -29.888%       | 32.994 | -22.046  | -40.054%       | 57.485 | -15.525  | -21.264%       |
| swap_syn_word_net   | 4.0      | 50.61 | -16.14   | -24.180%       | 36.476 | -18.564  | -33.727%       | 61.059 | -11.951  | -16.369%       |
| random_word_swap    | 4.0      | 64.18 | -2.57    | -3.850%        | 48.839 | -6.201   | -11.266%       | 71.537 | -1.473   | -2.017%        |



Table 25: Performance and decrease ratio of Full Finetuning on CLIP-BART against text corruptions given severity 5.

| corruption          | severity | VQA   |          |                | GQA    |          |                | NLVR   |          |                |
|---------------------|----------|-------|----------|----------------|--------|----------|----------------|--------|----------|----------------|
|                     |          | Acc   | Decrease | Decrease Ratio | Acc    | Decrease | Decrease Ratio | CIDer  | Decrease | Decrease Ratio |
| ocr                 | 5.0      | 40.23 | -26.52   | -39.730%       | 23.66  | -31.38   | -57.012%       | 54.17  | -18.84   | -25.805%       |
| punctuation         | 5.0      | 65.94 | -0.81    | -1.213%        | 54.309 | -0.731   | -1.328%        | 72.355 | -0.655   | -0.897%        |
| typos               | 5.0      | 30.35 | -36.4    | -54.532%       | 19.979 | -35.061  | -63.700%       | 53.136 | -19.874  | -27.221%       |
| keyboard            | 5.0      | 27.34 | -39.41   | -59.041%       | 18.055 | -36.985  | -67.196%       | 50.854 | -22.156  | -30.346%       |
| spell_error         | 5.0      | 36.24 | -30.51   | -45.708%       | 24.257 | -30.783  | -55.929%       | 55.691 | -17.319  | -23.721%       |
| random_char_insert  | 5.0      | 23.51 | -43.24   | -64.779%       | 17.849 | -37.191  | -67.572%       | 52.591 | -20.419  | -27.968%       |
| random_char_replace | 5.0      | 19.82 | -46.93   | -70.307%       | 16.092 | -38.948  | -70.764%       | 51.974 | -21.036  | -28.813%       |
| random_char_swap    | 5.0      | 25.33 | -41.42   | -62.052%       | 18.922 | -36.118  | -65.621%       | 52.591 | -20.419  | -27.968%       |
| random_char_delete  | 5.0      | 22.22 | -44.53   | -66.712%       | 18.095 | -36.945  | -67.124%       | 51.615 | -21.395  | -29.305%       |
| to_passive          | 5.0      | 62.82 | -3.93    | -5.888%        | 51.224 | -3.816   | -6.932%        | 70.131 | -2.879   | -3.944%        |
| tense               | 5.0      | 65.81 | -0.94    | -1.408%        | 54.826 | -0.214   | -0.389%        | 73.044 | 0.034    | 0.047%         |
| to_formal           | 5.0      | 66.24 | -0.51    | -0.764%        | 53.935 | -1.105   | -2.007%        | 72.47  | -0.54    | -0.739%        |
| to_casual           | 5.0      | 63.58 | -3.17    | -4.749%        | 51.566 | -3.474   | -6.311%        | 71.107 | -1.903   | -2.607%        |
| to_active           | 5.0      | 64.88 | -1.87    | -2.801%        | 53.26  | -1.78    | -3.235%        | 72.384 | -0.626   | -0.857%        |
| double_denial       | 5.0      | 66.63 | -0.12    | -0.180%        | 55.033 | -0.007   | -0.013%        | 73.016 | 0.006    | 0.008%         |
| insert_adv          | 5.0      | 61.67 | -5.08    | -7.610%        | 49.61  | -5.43    | -9.865%        | 70.547 | -2.463   | -3.374%        |
| append_irr          | 5.0      | 60.56 | -6.19    | -9.273%        | 47.194 | -7.846   | -14.256%       | 66.571 | -6.439   | -8.819%        |
| random_word_insert  | 5.0      | 55.76 | -10.99   | -16.464%       | 32.0   | -23.04   | -41.860%       | 63.356 | -9.654   | -13.223%       |
| drop_nn             | 5.0      | 43.85 | -22.9    | -34.307%       | 30.919 | -24.121  | -43.824%       | 60.672 | -12.338  | -16.899%       |
| drop_rand_one_nn    | 5.0      | 57.5  | -9.25    | -13.858%       | 45.476 | -9.564   | -17.376%       | 71.049 | -1.961   | -2.686%        |
| drop_vb             | 5.0      | 58.63 | -8.12    | -12.165%       | 40.356 | -14.684  | -26.678%       | 68.451 | -4.559   | -6.244%        |
| drop_vb_nn          | 5.0      | 43.14 | -23.61   | -35.371%       | 27.373 | -27.667  | -50.267%       | 57.858 | -15.152  | -20.753%       |
| only_nn             | 5.0      | 32.64 | -34.11   | -51.101%       | 20.234 | -34.806  | -63.238%       | 52.16  | -20.85   | -28.557%       |
| only_vb             | 5.0      | 51.97 | -14.78   | -22.142%       | 39.831 | -15.209  | -27.632%       | 65.265 | -7.745   | -10.608%       |
| only_vb_nn          | 5.0      | 37.61 | -29.14   | -43.655%       | 21.848 | -33.192  | -60.306%       | 54.084 | -18.926  | -25.923%       |
| drop_rand_one_vb    | 5.0      | 63.63 | -3.12    | -4.674%        | 47.257 | -7.783   | -14.140%       | 71.035 | -1.975   | -2.705%        |
| drop_first          | 5.0      | 56.8  | -9.95    | -14.906%       | 39.744 | -15.296  | -27.791%       | 70.748 | -2.262   | -3.098%        |
| drop_last           | 5.0      | 54.22 | -12.53   | -18.772%       | 45.548 | -9.492   | -17.246%       | 69.068 | -3.942   | -5.399%        |
| drop_first_and_last | 5.0      | 40.6  | -26.15   | -39.176%       | 31.436 | -23.604  | -42.885%       | 65.294 | -7.716   | -10.569%       |
| shuffle_order       | 5.0      | 59.93 | -6.82    | -10.217%       | 41.724 | -13.316  | -24.194%       | 68.408 | -4.602   | -6.303%        |
| random_word_delete  | 5.0      | 42.58 | -24.17   | -36.210%       | 31.849 | -23.191  | -42.134%       | 63.959 | -9.051   | -12.397%       |
| swap_syn_word_emb   | 5.0      | 46.06 | -20.69   | -30.996%       | 32.0   | -23.04   | -41.860%       | 57.916 | -15.094  | -20.674%       |
| swap_syn_word_net   | 5.0      | 46.31 | -20.44   | -30.622%       | 35.165 | -19.875  | -36.111%       | 58.619 | -14.391  | -19.711%       |
| back_trans          | 5.0      | 62.77 | -3.98    | -5.963%        | 50.549 | -4.491   | -8.160%        | 71.781 | -1.229   | -1.683%        |
| random_word_swap    | 5.0      | 63.54 | -3.21    | -4.809%        | 47.917 | -7.123   | -12.942%       | 70.69  | -2.32    | -3.177%        |
| nonsense            | 5.0      | 0.0   | -66.75   | -100.000%      | 17.038 | -38.002  | -69.045%       | 51.227 | -21.783  | -29.835%       |

Table 26: Performance and decrease ratio of Half-shared Adapters on CLIP-BART against text corruptions given severity 1 to 4.

| corruption          | severity | VQA   |          |                | GQA    |          |                | NLVR   |          |                |
|---------------------|----------|-------|----------|----------------|--------|----------|----------------|--------|----------|----------------|
|                     |          | Acc   | Decrease | Decrease Ratio | Acc    | Decrease | Decrease Ratio | CIDer  | Decrease | Decrease Ratio |
| ocr                 | 1.0      | 55.06 | -10.14   | -15.552%       | 42.662 | -10.298  | -19.445%       | 55.304 | -14.726  | -21.029%       |
| typos               | 1.0      | 56.41 | -8.79    | -13.482%       | 45.015 | -7.945   | -15.002%       | 67.963 | -2.067   | -2.951%        |
| keyboard            | 1.0      | 55.45 | -9.75    | -14.954%       | 43.91  | -9.05    | -17.088%       | 67.332 | -2.698   | -3.853%        |
| spell_error         | 1.0      | 55.93 | -9.27    | -14.218%       | 45.031 | -7.929   | -14.972%       | 67.389 | -2.641   | -3.771%        |
| random_char_insert  | 1.0      | 51.8  | -13.4    | -20.552%       | 36.087 | -16.873  | -31.860%       | 62.064 | -7.966   | -11.375%       |
| random_char_replace | 1.0      | 47.95 | -17.25   | -26.457%       | 32.644 | -20.316  | -38.360%       | 60.126 | -9.904   | -14.142%       |
| random_char_swap    | 1.0      | 41.02 | -24.18   | -37.086%       | 26.515 | -26.445  | -49.935%       | 55.476 | -14.554  | -20.783%       |
| random_char_delete  | 1.0      | 49.17 | -16.03   | -24.586%       | 34.107 | -18.853  | -35.598%       | 61.131 | -8.899   | -12.707%       |
| random_word_insert  | 1.0      | 65.15 | -0.05    | -0.077%        | 51.328 | -1.632   | -3.082%        | 69.714 | -0.316   | -0.451%        |
| random_word_delete  | 1.0      | 65.02 | -0.18    | -0.276%        | 51.813 | -1.147   | -2.166%        | 69.815 | -0.215   | -0.307%        |
| swap_syn_word_emb   | 1.0      | 55.38 | -9.82    | -15.061%       | 45.659 | -7.301   | -13.786%       | 65.738 | -4.292   | -6.128%        |
| swap_syn_word_net   | 1.0      | 57.86 | -7.34    | -11.258%       | 45.54  | -7.42    | -14.011%       | 68.006 | -2.024   | -2.890%        |
| random_word_swap    | 1.0      | 65.1  | -0.1     | -0.153%        | 52.163 | -0.797   | -1.506%        | 69.714 | -0.316   | -0.451%        |

  

| corruption          | severity | VQA   |          |                | GQA    |          |                | NLVR   |          |                |
|---------------------|----------|-------|----------|----------------|--------|----------|----------------|--------|----------|----------------|
|                     |          | Acc   | Decrease | Decrease Ratio | Acc    | Decrease | Decrease Ratio | CIDer  | Decrease | Decrease Ratio |
| ocr                 | 2.0      | 54.41 | -10.79   | -16.549%       | 38.822 | -14.138  | -26.696%       | 63.313 | -6.717   | -9.592%        |
| typos               | 2.0      | 55.4  | -9.8     | -15.031%       | 40.595 | -12.365  | -23.348%       | 64.834 | -5.196   | -7.419%        |
| keyboard            | 2.0      | 54.98 | -10.22   | -15.675%       | 39.768 | -13.192  | -24.910%       | 64.174 | -5.856   | -8.362%        |
| spell_error         | 2.0      | 55.42 | -9.78    | -15.000%       | 41.93  | -11.03   | -20.826%       | 64.791 | -5.239   | -7.481%        |
| random_char_insert  | 2.0      | 41.39 | -23.81   | -36.518%       | 26.419 | -26.541  | -50.115%       | 55.347 | -14.683  | -20.967%       |
| random_char_replace | 2.0      | 37.23 | -27.97   | -42.899%       | 22.619 | -30.341  | -57.291%       | 53.352 | -16.678  | -23.816%       |
| random_char_swap    | 2.0      | 32.29 | -32.91   | -50.475%       | 19.447 | -33.513  | -63.280%       | 50.854 | -19.176  | -27.383%       |
| random_char_delete  | 2.0      | 38.42 | -26.78   | -41.074%       | 25.449 | -27.511  | -51.946%       | 56.021 | -14.009  | -20.004%       |
| random_word_insert  | 2.0      | 64.26 | -0.94    | -1.442%        | 47.837 | -5.123   | -9.672%        | 68.681 | -1.349   | -1.926%        |
| random_word_delete  | 2.0      | 59.85 | -5.35    | -8.206%        | 45.635 | -7.325   | -13.831%       | 68.064 | -1.966   | -2.808%        |
| swap_syn_word_emb   | 2.0      | 54.59 | -10.61   | -16.273%       | 42.574 | -10.386  | -19.610%       | 61.791 | -8.239   | -11.765%       |
| swap_syn_word_net   | 2.0      | 57.46 | -7.74    | -11.871%       | 43.632 | -9.328   | -17.614%       | 65.968 | -4.062   | -5.800%        |
| random_word_swap    | 2.0      | 63.95 | -1.25    | -1.917%        | 49.897 | -3.063   | -5.784%        | 69.083 | -0.947   | -1.353%        |

  

| corruption          | severity | VQA   |          |                | GQA    |          |                | NLVR   |          |                |
|---------------------|----------|-------|----------|----------------|--------|----------|----------------|--------|----------|----------------|
|                     |          | Acc   | Decrease | Decrease Ratio | Acc    | Decrease | Decrease Ratio | CIDer  | Decrease | Decrease Ratio |
| ocr                 | 3.0      | 49.77 | -15.43   | -23.666%       | 31.221 | -21.739  | -41.048%       | 58.992 | -11.038  | -15.761%       |
| typos               | 3.0      | 50.85 | -14.35   | -22.009%       | 34.147 | -18.813  | -35.523%       | 61.289 | -8.741   | -12.482%       |
| keyboard            | 3.0      | 49.41 | -15.79   | -24.218%       | 33.042 | -19.918  | -37.610%       | 60.098 | -9.932   | -14.183%       |
| spell_error         | 3.0      | 50.33 | -14.87   | -22.807%       | 35.029 | -17.931  | -33.857%       | 61.576 | -8.454   | -12.072%       |
| random_char_insert  | 3.0      | 34.78 | -30.42   | -46.656%       | 21.275 | -31.685  | -59.828%       | 52.203 | -17.827  | -25.456%       |
| random_char_replace | 3.0      | 31.33 | -33.87   | -51.948%       | 18.119 | -34.841  | -65.788%       | 50.696 | -19.334  | -27.608%       |
| random_char_swap    | 3.0      | 28.51 | -36.69   | -56.273%       | 17.149 | -35.811  | -67.619%       | 50.208 | -19.822  | -28.305%       |
| random_char_delete  | 3.0      | 33.0  | -32.2    | -49.387%       | 20.266 | -32.694  | -61.734%       | 53.05  | -16.98   | -24.247%       |
| random_word_insert  | 3.0      | 63.47 | -1.73    | -2.653%        | 44.872 | -8.088   | -15.272%       | 68.293 | -1.737   | -2.480%        |
| random_word_delete  | 3.0      | 57.15 | -8.05    | -12.347%       | 41.954 | -11.006  | -20.781%       | 65.494 | -4.536   | -6.477%        |
| swap_syn_word_emb   | 3.0      | 50.79 | -14.41   | -22.101%       | 37.065 | -15.895  | -30.014%       | 58.921 | -11.109  | -15.864%       |
| swap_syn_word_net   | 3.0      | 53.94 | -11.26   | -17.270%       | 38.591 | -14.369  | -27.131%       | 62.566 | -7.464   | -10.658%       |
| random_word_swap    | 3.0      | 63.24 | -1.96    | -3.006%        | 48.656 | -4.304   | -8.126%        | 68.767 | -1.263   | -1.803%        |

  

| corruption          | severity | VQA   |          |                | GQA    |          |                | NLVR   |          |                |
|---------------------|----------|-------|----------|----------------|--------|----------|----------------|--------|----------|----------------|
|                     |          | Acc   | Decrease | Decrease Ratio | Acc    | Decrease | Decrease Ratio | CIDer  | Decrease | Decrease Ratio |
| ocr                 | 4.0      | 43.02 | -22.18   | -34.018%       | 26.276 | -26.684  | -50.385%       | 55.863 | -14.167  | -20.229%       |
| typos               | 4.0      | 42.01 | -23.19   | -35.567%       | 27.588 | -25.372  | -47.908%       | 57.672 | -12.358  | -17.647%       |
| keyboard            | 4.0      | 40.04 | -25.16   | -38.589%       | 26.014 | -26.946  | -50.881%       | 56.882 | -13.148  | -18.774%       |
| spell_error         | 4.0      | 41.43 | -23.77   | -36.457%       | 28.701 | -24.259  | -45.806%       | 57.155 | -12.875  | -18.385%       |
| random_char_insert  | 4.0      | 30.45 | -34.75   | -53.298%       | 17.554 | -35.406  | -66.853%       | 50.452 | -19.578  | -27.956%       |
| random_char_replace | 4.0      | 28.05 | -37.15   | -56.979%       | 15.145 | -37.815  | -71.402%       | 50.438 | -19.592  | -27.977%       |
| random_char_swap    | 4.0      | 26.75 | -38.45   | -58.972%       | 15.869 | -37.091  | -70.036%       | 50.065 | -19.965  | -28.510%       |
| random_char_delete  | 4.0      | 29.76 | -35.44   | -54.356%       | 17.936 | -35.024  | -66.133%       | 51.385 | -18.645  | -26.624%       |
| random_word_insert  | 4.0      | 61.26 | -3.94    | -6.043%        | 41.724 | -11.236  | -21.217%       | 67.217 | -2.813   | -4.017%        |
| random_word_delete  | 4.0      | 50.83 | -14.37   | -22.040%       | 35.928 | -17.032  | -32.160%       | 64.217 | -5.813   | -8.301%        |
| swap_syn_word_emb   | 4.0      | 46.53 | -18.67   | -28.635%       | 34.258 | -18.702  | -35.313%       | 57.959 | -12.071  | -17.237%       |
| swap_syn_word_net   | 4.0      | 50.42 | -14.78   | -22.669%       | 35.888 | -17.072  | -32.236%       | 59.638 | -10.392  | -14.839%       |
| random_word_swap    | 4.0      | 62.6  | -2.6     | -3.988%        | 47.194 | -5.766   | -10.888%       | 68.896 | -1.134   | -1.619%        |

Table 27: Performance and decrease ratio of Half-shared Adapters on CLIP-BART against text corruptions given severity 5.

| corruption          | severity | VQA   |          |                | GQA    |          |                | NLVR   |          |                |
|---------------------|----------|-------|----------|----------------|--------|----------|----------------|--------|----------|----------------|
|                     |          | Acc   | Decrease | Decrease Ratio | Acc    | Decrease | Decrease Ratio | CIDer  | Decrease | Decrease Ratio |
| ocr                 | 5.0      | 39.61 | -25.59   | -39.248%       | 23.644 | -29.316  | -55.354%       | 53.337 | -16.693  | -23.837%       |
| punctuation         | 5.0      | 64.58 | -0.62    | -0.951%        | 51.63  | -1.33    | -2.512%        | 69.628 | -0.402   | -0.574%        |
| typos               | 5.0      | 29.71 | -35.49   | -54.433%       | 19.908 | -33.052  | -62.410%       | 51.687 | -18.343  | -26.194%       |
| keyboard            | 5.0      | 27.36 | -37.84   | -58.037%       | 18.986 | -33.974  | -64.151%       | 50.61  | -19.42   | -27.731%       |
| spell_error         | 5.0      | 34.42 | -30.78   | -47.209%       | 24.503 | -28.457  | -53.733%       | 54.457 | -15.573  | -22.238%       |
| random_char_insert  | 5.0      | 28.04 | -37.16   | -56.994%       | 16.147 | -36.813  | -69.510%       | 49.677 | -20.353  | -29.063%       |
| random_char_replace | 5.0      | 26.58 | -38.62   | -59.233%       | 13.54  | -39.42   | -74.434%       | 50.079 | -19.951  | -28.489%       |
| random_char_swap    | 5.0      | 26.08 | -39.12   | -60.000%       | 16.227 | -36.733  | -69.360%       | 51.112 | -18.918  | -27.014%       |
| random_char_delete  | 5.0      | 27.36 | -37.84   | -58.037%       | 16.6   | -36.36   | -68.655%       | 51.184 | -18.846  | -26.911%       |
| to_passive          | 5.0      | 62.61 | -2.59    | -3.972%        | 45.937 | -7.023   | -13.260%       | 67.159 | -2.871   | -4.099%        |
| tense               | 5.0      | 64.41 | -0.79    | -1.212%        | 52.608 | -0.352   | -0.665%        | 69.7   | -0.33    | -0.471%        |
| to_formal           | 5.0      | 64.81 | -0.39    | -0.598%        | 52.123 | -0.837   | -1.581%        | 69.585 | -0.445   | -0.635%        |
| to_casual           | 5.0      | 62.36 | -2.84    | -4.356%        | 48.171 | -4.789   | -9.042%        | 68.537 | -1.493   | -2.131%        |
| to_active           | 5.0      | 63.44 | -1.76    | -2.699%        | 50.143 | -2.817   | -5.319%        | 69.327 | -0.703   | -1.004%        |
| double_denial       | 5.0      | 65.15 | -0.05    | -0.077%        | 52.965 | 0.005    | 0.010%         | 70.016 | -0.014   | -0.020%        |
| insert_adv          | 5.0      | 62.0  | -3.2     | -4.908%        | 50.294 | -2.666   | -5.034%        | 68.911 | -1.119   | -1.598%        |
| append_irr          | 5.0      | 61.15 | -4.05    | -6.212%        | 48.37  | -4.59    | -8.667%        | 64.102 | -5.928   | -8.465%        |
| random_word_insert  | 5.0      | 58.49 | -6.71    | -10.291%       | 37.407 | -15.553  | -29.368%       | 65.566 | -4.464   | -6.374%        |
| drop_nn             | 5.0      | 45.44 | -19.76   | -30.307%       | 32.644 | -20.316  | -38.360%       | 63.801 | -6.229   | -8.895%        |
| drop_rand_one_nn    | 5.0      | 57.06 | -8.14    | -12.485%       | 44.872 | -8.088   | -15.272%       | 68.667 | -1.363   | -1.947%        |
| drop_vb             | 5.0      | 59.61 | -5.59    | -8.574%        | 38.289 | -14.671  | -27.702%       | 67.231 | -2.799   | -3.997%        |
| drop_vb_nn          | 5.0      | 46.1  | -19.1    | -29.294%       | 22.619 | -30.341  | -57.291%       | 60.801 | -9.229   | -13.179%       |
| only_nn             | 5.0      | 34.27 | -30.93   | -47.439%       | 12.22  | -40.74   | -76.926%       | 56.193 | -13.837  | -19.758%       |
| only_vb             | 5.0      | 52.86 | -12.34   | -18.926%       | 39.005 | -13.955  | -26.351%       | 65.337 | -4.693   | -6.702%        |
| only_vb_nn          | 5.0      | 44.08 | -21.12   | -32.393%       | 30.522 | -22.438  | -42.369%       | 58.605 | -11.425  | -16.315%       |
| drop_rand_one_vb    | 5.0      | 63.06 | -2.14    | -3.282%        | 46.112 | -6.848   | -12.930%       | 68.293 | -1.737   | -2.480%        |
| drop_first          | 5.0      | 60.34 | -4.86    | -7.454%        | 43.187 | -9.773   | -18.454%       | 68.609 | -1.421   | -2.029%        |
| drop_last           | 5.0      | 54.14 | -11.06   | -16.963%       | 46.08  | -6.88    | -12.990%       | 67.547 | -2.483   | -3.546%        |
| drop_first_and_last | 5.0      | 46.95 | -18.25   | -27.991%       | 34.68  | -18.28   | -34.517%       | 66.413 | -3.617   | -5.165%        |
| shuffle_order       | 5.0      | 58.03 | -7.17    | -10.997%       | 40.698 | -12.262  | -23.153%       | 64.791 | -5.239   | -7.481%        |
| random_word_delete  | 5.0      | 45.05 | -20.15   | -30.905%       | 30.243 | -22.717  | -42.894%       | 62.523 | -7.507   | -10.719%       |
| swap_syn_word_emb   | 5.0      | 45.89 | -19.31   | -29.617%       | 33.026 | -19.934  | -37.640%       | 57.442 | -12.588  | -17.975%       |
| swap_syn_word_net   | 5.0      | 47.68 | -17.52   | -26.871%       | 35.292 | -17.668  | -33.361%       | 57.93  | -12.1    | -17.278%       |
| back_trans          | 5.0      | 61.61 | -3.59    | -5.506%        | 49.61  | -3.35    | -6.325%        | 68.81  | -1.22    | -1.742%        |
| random_word_swap    | 5.0      | 61.69 | -3.51    | -5.383%        | 45.937 | -7.023   | -13.260%       | 67.762 | -2.268   | -3.238%        |
| nonsense            | 5.0      | 11.67 | -53.53   | -82.101%       | 7.457  | -45.503  | -85.919%       | 51.285 | -18.745  | -26.768%       |

Table 28: Performance and decrease ratio of Hyperformer on CLIP-BART against text corruptions given severity 1 to 4.

| corruption          | severity | VQA   |          |                | GQA    |          |                | NLVR   |          |                |
|---------------------|----------|-------|----------|----------------|--------|----------|----------------|--------|----------|----------------|
|                     |          | Acc   | Decrease | Decrease Ratio | Acc    | Decrease | Decrease Ratio | CIDer  | Decrease | Decrease Ratio |
| ocr                 | 1.0      | 54.68 | -10.7    | -16.366%       | 42.821 | -9.699   | -18.468%       | 56.94  | -15.27   | -21.147%       |
| typos               | 1.0      | 56.24 | -9.14    | -13.980%       | 45.047 | -7.473   | -14.229%       | 69.772 | -2.438   | -3.377%        |
| keyboard            | 1.0      | 55.04 | -10.34   | -15.815%       | 43.95  | -8.57    | -16.318%       | 69.198 | -3.012   | -4.172%        |
| spell_error         | 1.0      | 55.72 | -9.66    | -14.775%       | 44.753 | -7.767   | -14.789%       | 69.241 | -2.969   | -4.112%        |
| random_char_insert  | 1.0      | 51.13 | -14.25   | -21.796%       | 35.983 | -16.537  | -31.486%       | 63.815 | -8.395   | -11.626%       |
| random_char_replace | 1.0      | 47.55 | -17.83   | -27.271%       | 31.825 | -20.695  | -39.403%       | 62.007 | -10.203  | -14.130%       |
| random_char_swap    | 1.0      | 41.02 | -24.36   | -37.259%       | 26.244 | -26.276  | -50.030%       | 57.04  | -15.17   | -21.008%       |
| random_char_delete  | 1.0      | 49.05 | -16.33   | -24.977%       | 34.449 | -18.071  | -34.408%       | 63.241 | -8.969   | -12.421%       |
| random_word_insert  | 1.0      | 65.32 | -0.06    | -0.092%        | 50.636 | -1.884   | -3.587%        | 71.652 | -0.558   | -0.773%        |
| random_word_delete  | 1.0      | 65.21 | -0.17    | -0.260%        | 51.36  | -1.16    | -2.210%        | 71.681 | -0.529   | -0.733%        |
| swap_syn_word_emb   | 1.0      | 55.18 | -10.2    | -15.601%       | 45.5   | -7.02    | -13.366%       | 67.317 | -4.893   | -6.776%        |
| swap_syn_word_net   | 1.0      | 57.82 | -7.56    | -11.563%       | 46.128 | -6.392   | -12.170%       | 69.427 | -2.783   | -3.854%        |
| random_word_swap    | 1.0      | 65.28 | -0.1     | -0.153%        | 51.725 | -0.795   | -1.513%        | 71.781 | -0.429   | -0.594%        |

  

| corruption          | severity | VQA   |          |                | GQA    |          |                | NLVR   |          |                |
|---------------------|----------|-------|----------|----------------|--------|----------|----------------|--------|----------|----------------|
|                     |          | Acc   | Decrease | Decrease Ratio | Acc    | Decrease | Decrease Ratio | CIDer  | Decrease | Decrease Ratio |
| ocr                 | 2.0      | 53.7  | -11.68   | -17.865%       | 39.307 | -13.213  | -25.159%       | 65.308 | -6.902   | -9.558%        |
| typos               | 2.0      | 54.86 | -10.52   | -16.091%       | 41.048 | -11.472  | -21.843%       | 66.169 | -6.041   | -8.366%        |
| keyboard            | 2.0      | 54.58 | -10.8    | -16.519%       | 40.269 | -12.251  | -23.327%       | 66.557 | -5.653   | -7.829%        |
| spell_error         | 2.0      | 55.08 | -10.3    | -15.754%       | 42.217 | -10.303  | -19.618%       | 65.624 | -6.586   | -9.121%        |
| random_char_insert  | 2.0      | 41.12 | -24.26   | -37.106%       | 25.529 | -26.991  | -51.392%       | 57.744 | -14.466  | -20.034%       |
| random_char_replace | 2.0      | 36.76 | -28.62   | -43.775%       | 22.571 | -29.949  | -57.024%       | 55.935 | -16.275  | -22.538%       |
| random_char_swap    | 2.0      | 31.93 | -33.45   | -51.162%       | 19.868 | -32.652  | -62.171%       | 52.82  | -19.39   | -26.852%       |
| random_char_delete  | 2.0      | 38.54 | -26.84   | -41.052%       | 25.401 | -27.119  | -51.635%       | 56.768 | -15.442  | -21.385%       |
| random_word_insert  | 2.0      | 63.6  | -1.78    | -2.723%        | 46.947 | -5.573   | -10.611%       | 70.26  | -1.95    | -2.701%        |
| random_word_delete  | 2.0      | 59.43 | -5.95    | -9.101%        | 46.454 | -6.066   | -11.550%       | 68.911 | -3.299   | -4.569%        |
| swap_syn_word_emb   | 2.0      | 54.64 | -10.74   | -16.427%       | 42.391 | -10.129  | -19.285%       | 62.466 | -9.744   | -13.494%       |
| swap_syn_word_net   | 2.0      | 57.61 | -7.77    | -11.884%       | 44.292 | -8.228   | -15.667%       | 67.002 | -5.208   | -7.213%        |
| random_word_swap    | 2.0      | 64.03 | -1.35    | -2.065%        | 49.428 | -3.092   | -5.888%        | 71.193 | -1.017   | -1.409%        |

  

| corruption          | severity | VQA   |          |                | GQA    |          |                | NLVR   |          |                |
|---------------------|----------|-------|----------|----------------|--------|----------|----------------|--------|----------|----------------|
|                     |          | Acc   | Decrease | Decrease Ratio | Acc    | Decrease | Decrease Ratio | CIDer  | Decrease | Decrease Ratio |
| ocr                 | 3.0      | 49.21 | -16.17   | -24.732%       | 32.509 | -20.011  | -38.101%       | 61.648 | -10.562  | -14.627%       |
| typos               | 3.0      | 50.18 | -15.2    | -23.249%       | 34.958 | -17.562  | -33.439%       | 63.528 | -8.682   | -12.023%       |
| keyboard            | 3.0      | 48.68 | -16.7    | -25.543%       | 33.09  | -19.43   | -36.996%       | 62.308 | -9.902   | -13.713%       |
| spell_error         | 3.0      | 50.07 | -15.31   | -23.417%       | 35.165 | -17.355  | -33.045%       | 62.466 | -9.744   | -13.494%       |
| random_char_insert  | 3.0      | 33.75 | -31.63   | -48.379%       | 21.506 | -31.014  | -59.052%       | 54.299 | -17.911  | -24.804%       |
| random_char_replace | 3.0      | 30.61 | -34.77   | -53.181%       | 19.9   | -32.62   | -62.110%       | 51.687 | -20.523  | -28.422%       |
| random_char_swap    | 3.0      | 28.17 | -37.21   | -56.913%       | 18.031 | -34.489  | -65.667%       | 50.954 | -21.256  | -29.436%       |
| random_char_delete  | 3.0      | 32.97 | -32.41   | -49.572%       | 20.822 | -31.698  | -60.354%       | 53.997 | -18.213  | -25.222%       |
| random_word_insert  | 3.0      | 61.46 | -3.92    | -5.996%        | 42.439 | -10.081  | -19.194%       | 67.949 | -4.261   | -5.901%        |
| random_word_delete  | 3.0      | 56.52 | -8.86    | -13.552%       | 42.924 | -9.596   | -18.271%       | 67.059 | -5.151   | -7.133%        |
| swap_syn_word_emb   | 3.0      | 50.61 | -14.77   | -22.591%       | 37.001 | -15.519  | -29.549%       | 60.299 | -11.911  | -16.496%       |
| swap_syn_word_net   | 3.0      | 53.92 | -11.46   | -17.528%       | 40.022 | -12.498  | -23.796%       | 63.37  | -8.84    | -12.242%       |
| random_word_swap    | 3.0      | 63.19 | -2.19    | -3.350%        | 48.267 | -4.253   | -8.098%        | 70.418 | -1.792   | -2.482%        |

  

| corruption          | severity | VQA   |          |                | GQA    |          |                | NLVR   |          |                |
|---------------------|----------|-------|----------|----------------|--------|----------|----------------|--------|----------|----------------|
|                     |          | Acc   | Decrease | Decrease Ratio | Acc    | Decrease | Decrease Ratio | CIDer  | Decrease | Decrease Ratio |
| ocr                 | 3.0      | 49.21 | -16.17   | -24.732%       | 32.509 | -20.011  | -38.101%       | 61.648 | -10.562  | -14.627%       |
| typos               | 3.0      | 50.18 | -15.2    | -23.249%       | 34.958 | -17.562  | -33.439%       | 63.528 | -8.682   | -12.023%       |
| keyboard            | 3.0      | 48.68 | -16.7    | -25.543%       | 33.09  | -19.43   | -36.996%       | 62.308 | -9.902   | -13.713%       |
| spell_error         | 3.0      | 50.07 | -15.31   | -23.417%       | 35.165 | -17.355  | -33.045%       | 62.466 | -9.744   | -13.494%       |
| random_char_insert  | 3.0      | 33.75 | -31.63   | -48.379%       | 21.506 | -31.014  | -59.052%       | 54.299 | -17.911  | -24.804%       |
| random_char_replace | 3.0      | 30.61 | -34.77   | -53.181%       | 19.9   | -32.62   | -62.110%       | 51.687 | -20.523  | -28.422%       |
| random_char_swap    | 3.0      | 28.17 | -37.21   | -56.913%       | 18.031 | -34.489  | -65.667%       | 50.954 | -21.256  | -29.436%       |
| random_char_delete  | 3.0      | 32.97 | -32.41   | -49.572%       | 20.822 | -31.698  | -60.354%       | 53.997 | -18.213  | -25.222%       |
| random_word_insert  | 3.0      | 61.46 | -3.92    | -5.996%        | 42.439 | -10.081  | -19.194%       | 67.949 | -4.261   | -5.901%        |
| random_word_delete  | 3.0      | 56.52 | -8.86    | -13.552%       | 42.924 | -9.596   | -18.271%       | 67.059 | -5.151   | -7.133%        |
| swap_syn_word_emb   | 3.0      | 50.61 | -14.77   | -22.591%       | 37.001 | -15.519  | -29.549%       | 60.299 | -11.911  | -16.496%       |
| swap_syn_word_net   | 3.0      | 53.92 | -11.46   | -17.528%       | 40.022 | -12.498  | -23.796%       | 63.37  | -8.84    | -12.242%       |
| random_word_swap    | 3.0      | 63.19 | -2.19    | -3.350%        | 48.267 | -4.253   | -8.098%        | 70.418 | -1.792   | -2.482%        |

Table 29: Performance and decrease ratio of Hyperformer on CLIP-BART against text corruptions given severity 5.

| corruption          | severity | VQA   |          |                | GQA    |          |                | NLVR   |          |                |
|---------------------|----------|-------|----------|----------------|--------|----------|----------------|--------|----------|----------------|
|                     |          | Acc   | Decrease | Decrease Ratio | Acc    | Decrease | Decrease Ratio | CIDer  | Decrease | Decrease Ratio |
| ocr                 | 5.0      | 39.58 | -25.8    | -39.462%       | 24.948 | -27.572  | -52.497%       | 54.729 | -17.481  | -24.208%       |
| punctuation         | 5.0      | 64.57 | -0.81    | -1.239%        | 51.304 | -1.216   | -2.316%        | 71.509 | -0.701   | -0.971%        |
| typos               | 5.0      | 29.88 | -35.5    | -54.298%       | 19.924 | -32.596  | -62.065%       | 51.73  | -20.48   | -28.362%       |
| keyboard            | 5.0      | 27.13 | -38.25   | -58.504%       | 18.898 | -33.622  | -64.017%       | 50.969 | -21.241  | -29.416%       |
| spell_error         | 5.0      | 34.74 | -30.64   | -46.864%       | 24.67  | -27.85   | -53.027%       | 55.031 | -17.179  | -23.791%       |
| random_char_insert  | 5.0      | 27.42 | -37.96   | -58.061%       | 18.747 | -33.773  | -64.305%       | 51.184 | -21.026  | -29.118%       |
| random_char_replace | 5.0      | 25.64 | -39.74   | -60.783%       | 18.286 | -34.234  | -65.183%       | 50.165 | -22.045  | -30.529%       |
| random_char_swap    | 5.0      | 25.53 | -39.85   | -60.951%       | 18.58  | -33.94   | -64.623%       | 51.242 | -20.968  | -29.038%       |
| random_char_delete  | 5.0      | 27.21 | -38.17   | -58.382%       | 17.825 | -34.695  | -66.061%       | 51.572 | -20.638  | -28.581%       |
| to_passive          | 5.0      | 62.96 | -2.42    | -3.701%        | 47.209 | -5.311   | -10.112%       | 68.882 | -3.328   | -4.609%        |
| tense               | 5.0      | 64.51 | -0.87    | -1.331%        | 52.425 | -0.095   | -0.181%        | 72.14  | -0.07    | -0.097%        |
| to_formal           | 5.0      | 64.84 | -0.54    | -0.826%        | 51.948 | -0.572   | -1.089%        | 71.681 | -0.529   | -0.733%        |
| to_casual           | 5.0      | 62.6  | -2.78    | -4.252%        | 47.83  | -4.69    | -8.931%        | 70.174 | -2.036   | -2.820%        |
| to_active           | 5.0      | 63.74 | -1.64    | -2.508%        | 50.223 | -2.297   | -4.374%        | 70.834 | -1.376   | -1.906%        |
| double_denial       | 5.0      | 65.27 | -0.11    | -0.168%        | 52.504 | -0.016   | -0.030%        | 72.198 | -0.012   | -0.017%        |
| insert_adv          | 5.0      | 62.02 | -3.36    | -5.139%        | 49.523 | -2.997   | -5.706%        | 70.949 | -1.261   | -1.747%        |
| append_irr          | 5.0      | 61.82 | -3.56    | -5.445%        | 46.446 | -6.074   | -11.565%       | 66.083 | -6.127   | -8.485%        |
| random_word_insert  | 5.0      | 54.55 | -10.83   | -16.565%       | 34.576 | -17.944  | -34.166%       | 62.179 | -10.031  | -13.892%       |
| drop_nn             | 5.0      | 44.68 | -20.7    | -31.661%       | 33.567 | -18.953  | -36.088%       | 61.289 | -10.921  | -15.124%       |
| drop_rand_one_nn    | 5.0      | 56.79 | -8.59    | -13.139%       | 44.641 | -7.879   | -15.001%       | 70.533 | -1.677   | -2.323%        |
| drop_vb             | 5.0      | 58.74 | -6.64    | -10.156%       | 41.779 | -10.741  | -20.451%       | 68.437 | -3.773   | -5.225%        |
| drop_vb_nn          | 5.0      | 44.4  | -20.98   | -32.089%       | 30.601 | -21.919  | -41.734%       | 57.471 | -14.739  | -20.411%       |
| only_nn             | 5.0      | 31.7  | -33.68   | -51.514%       | 20.711 | -31.809  | -60.566%       | 50.911 | -21.299  | -29.495%       |
| only_vb             | 5.0      | 50.58 | -14.8    | -22.637%       | 37.844 | -14.676  | -27.944%       | 65.164 | -7.046   | -9.757%        |
| only_vb_nn          | 5.0      | 33.83 | -31.55   | -48.256%       | 22.794 | -29.726  | -56.600%       | 52.663 | -19.547  | -27.070%       |
| drop_rand_one_vb    | 5.0      | 62.77 | -2.61    | -3.992%        | 47.822 | -4.698   | -8.946%        | 71.049 | -1.161   | -1.607%        |
| drop_first          | 5.0      | 55.2  | -10.18   | -15.571%       | 44.848 | -7.672   | -14.607%       | 70.834 | -1.376   | -1.906%        |
| drop_last           | 5.0      | 53.48 | -11.9    | -18.201%       | 45.762 | -6.758   | -12.867%       | 68.911 | -3.299   | -4.569%        |
| drop_first_and_last | 5.0      | 41.86 | -23.52   | -35.974%       | 37.542 | -14.978  | -28.519%       | 66.097 | -6.113   | -8.465%        |
| shuffle_order       | 5.0      | 57.24 | -8.14    | -12.450%       | 40.897 | -11.623  | -22.131%       | 68.179 | -4.031   | -5.583%        |
| random_word_delete  | 5.0      | 44.82 | -20.56   | -31.447%       | 31.921 | -20.599  | -39.222%       | 63.083 | -9.127   | -12.639%       |
| swap_syn_word_emb   | 5.0      | 46.01 | -19.37   | -29.627%       | 33.543 | -18.977  | -36.133%       | 58.576 | -13.634  | -18.881%       |
| swap_syn_word_net   | 5.0      | 47.69 | -17.69   | -27.057%       | 36.294 | -16.226  | -30.896%       | 57.988 | -14.222  | -19.696%       |
| back_trans          | 5.0      | 61.92 | -3.46    | -5.292%        | 49.579 | -2.941   | -5.600%        | 71.207 | -1.003   | -1.389%        |
| random_word_swap    | 5.0      | 61.94 | -3.44    | -5.262%        | 46.335 | -6.185   | -11.777%       | 70.102 | -2.108   | -2.919%        |
| nonsense            | 5.0      | 8.62  | -56.76   | -86.816%       | 13.905 | -38.615  | -73.524%       | 51.801 | -20.409  | -28.263%       |

Table 30: Performance and decrease ratio of Multiple Adapters on CLIP-BART against text corruptions given severity 1 to 4.

| corruption          | severity | VQA   |          |                | GQA    |          |                | NLVR   |          |                |
|---------------------|----------|-------|----------|----------------|--------|----------|----------------|--------|----------|----------------|
|                     |          | Acc   | Decrease | Decrease Ratio | Acc    | Decrease | Decrease Ratio | CIDer  | Decrease | Decrease Ratio |
| ocr                 | 1.0      | 54.59 | -10.71   | -16.401%       | 41.747 | -11.643  | -21.807%       | 54.758 | -14.652  | -21.109%       |
| typos               | 1.0      | 56.65 | -8.65    | -13.247%       | 43.457 | -9.933   | -18.605%       | 67.389 | -2.021   | -2.912%        |
| keyboard            | 1.0      | 55.55 | -9.75    | -14.931%       | 42.272 | -11.118  | -20.824%       | 67.619 | -1.791   | -2.581%        |
| spell_error         | 1.0      | 56.09 | -9.21    | -14.104%       | 44.021 | -9.369   | -17.548%       | 66.987 | -2.423   | -3.491%        |
| random_char_insert  | 1.0      | 51.31 | -13.99   | -21.424%       | 35.681 | -17.709  | -33.168%       | 62.337 | -7.073   | -10.191%       |
| random_char_replace | 1.0      | 47.81 | -17.49   | -26.784%       | 32.183 | -21.207  | -39.721%       | 59.782 | -9.628   | -13.871%       |
| random_char_swap    | 1.0      | 41.08 | -24.22   | -37.090%       | 26.045 | -27.345  | -51.217%       | 56.466 | -12.944  | -18.648%       |
| random_char_delete  | 1.0      | 49.7  | -15.6    | -23.890%       | 33.209 | -20.181  | -37.800%       | 61.519 | -7.891   | -11.369%       |
| random_word_insert  | 1.0      | 65.27 | -0.03    | -0.046%        | 49.825 | -3.565   | -6.677%        | 70.174 | 0.764    | 1.100%         |
| random_word_delete  | 1.0      | 65.12 | -0.18    | -0.276%        | 50.453 | -2.937   | -5.501%        | 69.571 | 0.161    | 0.232%         |
| swap_syn_word_emb   | 1.0      | 55.66 | -9.64    | -14.763%       | 44.188 | -9.202   | -17.235%       | 65.337 | -4.073   | -5.869%        |
| swap_syn_word_net   | 1.0      | 58.23 | -7.07    | -10.827%       | 44.49  | -8.9     | -16.669%       | 67.375 | -2.035   | -2.932%        |
| random_word_swap    | 1.0      | 65.21 | -0.09    | -0.138%        | 50.755 | -2.635   | -4.935%        | 70.044 | 0.634    | 0.914%         |

  

| corruption          | severity | VQA   |          |                | GQA    |          |                | NLVR   |          |                |
|---------------------|----------|-------|----------|----------------|--------|----------|----------------|--------|----------|----------------|
|                     |          | Acc   | Decrease | Decrease Ratio | Acc    | Decrease | Decrease Ratio | CIDer  | Decrease | Decrease Ratio |
| ocr                 | 2.0      | 54.06 | -11.24   | -17.213%       | 38.122 | -15.268  | -28.597%       | 63.227 | -6.183   | -8.908%        |
| typos               | 2.0      | 55.31 | -9.99    | -15.299%       | 39.959 | -13.431  | -25.157%       | 64.49  | -4.92    | -7.089%        |
| keyboard            | 2.0      | 54.76 | -10.54   | -16.141%       | 38.774 | -14.616  | -27.376%       | 63.844 | -5.566   | -8.019%        |
| spell_error         | 2.0      | 55.47 | -9.83    | -15.054%       | 41.278 | -12.112  | -22.685%       | 64.605 | -4.805   | -6.923%        |
| random_char_insert  | 2.0      | 41.08 | -24.22   | -37.090%       | 25.863 | -27.527  | -51.559%       | 56.423 | -12.987  | -18.710%       |
| random_char_replace | 2.0      | 36.94 | -28.36   | -43.430%       | 22.786 | -30.604  | -57.322%       | 54.902 | -14.508  | -20.902%       |
| random_char_swap    | 2.0      | 32.02 | -33.28   | -50.965%       | 20.075 | -33.315  | -62.400%       | 52.002 | -17.408  | -25.080%       |
| random_char_delete  | 2.0      | 38.7  | -26.6    | -40.735%       | 24.614 | -28.776  | -53.897%       | 56.495 | -12.915  | -18.607%       |
| random_word_insert  | 2.0      | 64.55 | -0.75    | -1.149%        | 46.041 | -7.349   | -13.765%       | 69.356 | -0.054   | -0.078%        |
| random_word_delete  | 2.0      | 60.42 | -4.88    | -7.473%        | 45.111 | -8.279   | -15.508%       | 67.863 | -1.547   | -2.229%        |
| swap_syn_word_emb   | 2.0      | 54.89 | -10.41   | -15.942%       | 41.445 | -11.945  | -22.372%       | 61.935 | -7.475   | -10.770%       |
| swap_syn_word_net   | 2.0      | 57.6  | -7.7     | -11.792%       | 42.495 | -10.895  | -20.407%       | 64.432 | -4.978   | -7.171%        |
| random_word_swap    | 2.0      | 64.07 | -1.23    | -1.884%        | 48.45  | -4.94    | -9.253%        | 69.198 | -0.212   | -0.306%        |

  

| corruption          | severity | VQA   |          |                | GQA    |          |                | NLVR   |          |                |
|---------------------|----------|-------|----------|----------------|--------|----------|----------------|--------|----------|----------------|
|                     |          | Acc   | Decrease | Decrease Ratio | Acc    | Decrease | Decrease Ratio | CIDer  | Decrease | Decrease Ratio |
| ocr                 | 3.0      | 49.47 | -15.83   | -24.242%       | 31.086 | -22.304  | -41.776%       | 58.418 | -10.992  | -15.836%       |
| typos               | 3.0      | 50.77 | -14.53   | -22.251%       | 33.249 | -20.141  | -37.725%       | 61.806 | -7.604   | -10.956%       |
| keyboard            | 3.0      | 49.31 | -15.99   | -24.487%       | 31.865 | -21.525  | -40.316%       | 60.227 | -9.183   | -13.230%       |
| spell_error         | 3.0      | 50.5  | -14.8    | -22.665%       | 34.719 | -18.671  | -34.970%       | 61.676 | -7.734   | -11.142%       |
| random_char_insert  | 3.0      | 34.33 | -30.97   | -47.427%       | 21.72  | -31.67   | -59.317%       | 52.964 | -16.446  | -23.694%       |
| random_char_replace | 3.0      | 30.93 | -34.37   | -52.634%       | 19.518 | -33.872  | -63.442%       | 51.687 | -17.723  | -25.534%       |
| random_char_swap    | 3.0      | 28.1  | -37.2    | -56.968%       | 18.111 | -35.279  | -66.078%       | 50.61  | -18.8    | -27.085%       |
| random_char_delete  | 3.0      | 33.59 | -31.71   | -48.560%       | 20.87  | -32.52   | -60.911%       | 52.677 | -16.733  | -24.108%       |
| random_word_insert  | 3.0      | 63.74 | -1.56    | -2.389%        | 42.654 | -10.736  | -20.109%       | 68.652 | -0.758   | -1.092%        |
| random_word_delete  | 3.0      | 57.76 | -7.54    | -11.547%       | 41.151 | -12.239  | -22.923%       | 65.38  | -4.03    | -5.807%        |
| swap_syn_word_emb   | 3.0      | 51.29 | -14.01   | -21.455%       | 36.524 | -16.866  | -31.590%       | 58.849 | -10.561  | -15.216%       |
| swap_syn_word_net   | 3.0      | 54.43 | -10.87   | -16.646%       | 37.248 | -16.142  | -30.235%       | 61.834 | -7.576   | -10.914%       |
| random_word_swap    | 3.0      | 63.46 | -1.84    | -2.818%        | 46.478 | -6.912   | -12.946%       | 69.068 | -0.342   | -0.492%        |

  

| corruption          | severity | VQA   |          |                | GQA    |          |                | NLVR   |          |                |
|---------------------|----------|-------|----------|----------------|--------|----------|----------------|--------|----------|----------------|
|                     |          | Acc   | Decrease | Decrease Ratio | Acc    | Decrease | Decrease Ratio | CIDer  | Decrease | Decrease Ratio |
| ocr                 | 4.0      | 42.33 | -22.97   | -35.176%       | 25.648 | -27.742  | -51.961%       | 54.586 | -14.824  | -21.357%       |
| typos               | 4.0      | 41.86 | -23.44   | -35.896%       | 26.92  | -26.47   | -49.579%       | 58.059 | -11.351  | -16.353%       |
| keyboard            | 4.0      | 39.79 | -25.51   | -39.066%       | 24.805 | -28.585  | -53.540%       | 57.055 | -12.355  | -17.800%       |
| spell_error         | 4.0      | 42.07 | -23.23   | -35.574%       | 28.121 | -25.269  | -47.330%       | 57.313 | -12.097  | -17.428%       |
| random_char_insert  | 4.0      | 30.15 | -35.15   | -53.828%       | 19.351 | -34.039  | -63.755%       | 51.658 | -17.752  | -25.576%       |
| random_char_replace | 4.0      | 28.39 | -36.91   | -56.524%       | 18.175 | -35.215  | -65.959%       | 51.242 | -18.168  | -26.176%       |
| random_char_swap    | 4.0      | 26.51 | -38.79   | -59.403%       | 17.944 | -35.446  | -66.391%       | 50.309 | -19.101  | -27.520%       |
| random_char_delete  | 4.0      | 30.31 | -34.99   | -53.583%       | 18.532 | -34.858  | -65.289%       | 51.643 | -17.767  | -25.597%       |
| random_word_insert  | 4.0      | 61.74 | -3.56    | -5.452%        | 39.331 | -14.059  | -26.333%       | 67.633 | -1.777   | -2.560%        |
| random_word_delete  | 4.0      | 51.76 | -13.54   | -20.735%       | 35.403 | -17.987  | -33.690%       | 63.571 | -5.839   | -8.412%        |
| swap_syn_word_emb   | 4.0      | 47.52 | -17.78   | -27.228%       | 33.63  | -19.76   | -37.010%       | 57.83  | -11.58   | -16.684%       |
| swap_syn_word_net   | 4.0      | 50.68 | -14.62   | -22.389%       | 34.616 | -18.774  | -35.164%       | 58.662 | -10.748  | -15.484%       |
| random_word_swap    | 4.0      | 62.58 | -2.72    | -4.165%        | 45.373 | -8.017   | -15.016%       | 68.179 | -1.231   | -1.774%        |

Table 31: Performance and decrease ratio of Multiple Adapters on CLIP-BART against text corruptions given severity 5.

| corruption          | severity | VQA   |          |                | GQA    |          |                | NLVR   |          |                |
|---------------------|----------|-------|----------|----------------|--------|----------|----------------|--------|----------|----------------|
|                     |          | Acc   | Decrease | Decrease Ratio | Acc    | Decrease | Decrease Ratio | CIDer  | Decrease | Decrease Ratio |
| ocr                 | 5.0      | 39.27 | -26.03   | -39.862%       | 23.064 | -30.326  | -56.801%       | 52.993 | -16.417  | -23.653%       |
| punctuation         | 5.0      | 64.64 | -0.66    | -1.011%        | 50.89  | -2.5     | -4.682%        | 69.155 | -0.255   | -0.368%        |
| typos               | 5.0      | 29.45 | -35.85   | -54.900%       | 19.741 | -33.649  | -63.025%       | 51.328 | -18.082  | -26.051%       |
| keyboard            | 5.0      | 27.31 | -37.99   | -58.178%       | 17.896 | -35.494  | -66.480%       | 50.624 | -18.786  | -27.065%       |
| spell_error         | 5.0      | 35.0  | -30.3    | -46.401%       | 24.217 | -29.173  | -54.642%       | 54.615 | -14.795  | -21.316%       |
| random_char_insert  | 5.0      | 27.68 | -37.62   | -57.611%       | 18.524 | -34.866  | -65.304%       | 50.28  | -19.13   | -27.561%       |
| random_char_replace | 5.0      | 26.9  | -38.4    | -58.806%       | 17.642 | -35.748  | -66.957%       | 50.337 | -19.073  | -27.478%       |
| random_char_swap    | 5.0      | 26.1  | -39.2    | -60.031%       | 18.755 | -34.635  | -64.872%       | 51.242 | -18.168  | -26.176%       |
| random_char_delete  | 5.0      | 27.47 | -37.83   | -57.933%       | 18.008 | -35.382  | -66.272%       | 51.256 | -18.154  | -26.155%       |
| to_passive          | 5.0      | 62.59 | -2.71    | -4.150%        | 45.126 | -8.264   | -15.478%       | 68.092 | -1.318   | -1.898%        |
| tense               | 5.0      | 64.64 | -0.66    | -1.011%        | 51.463 | -1.927   | -3.610%        | 69.844 | 0.434    | 0.625%         |
| to_formal           | 5.0      | 64.91 | -0.39    | -0.597%        | 50.962 | -2.428   | -4.548%        | 69.6   | 0.19     | 0.273%         |
| to_casual           | 5.0      | 62.02 | -3.28    | -5.023%        | 46.629 | -6.761   | -12.663%       | 68.193 | -1.217   | -1.753%        |
| to_active           | 5.0      | 63.62 | -1.68    | -2.573%        | 48.792 | -4.598   | -8.613%        | 68.939 | -0.471   | -0.678%        |
| double_denial       | 5.0      | 65.27 | -0.03    | -0.046%        | 51.725 | -1.665   | -3.118%        | 70.03  | 0.62     | 0.893%         |
| insert_adv          | 5.0      | 60.92 | -4.38    | -6.708%        | 48.259 | -5.131   | -9.611%        | 68.868 | -0.542   | -0.782%        |
| append_irr          | 5.0      | 58.2  | -7.1     | -10.873%       | 45.588 | -7.802   | -14.614%       | 63.514 | -5.896   | -8.495%        |
| random_word_insert  | 5.0      | 58.78 | -6.52    | -9.985%        | 34.322 | -19.068  | -35.715%       | 67.403 | -2.007   | -2.891%        |
| drop_nn             | 5.0      | 45.5  | -19.8    | -30.322%       | 32.08  | -21.31   | -39.914%       | 63.7   | -5.71    | -8.226%        |
| drop_rand_one_nn    | 5.0      | 57.31 | -7.99    | -12.236%       | 44.053 | -9.337   | -17.488%       | 68.982 | -0.428   | -0.616%        |
| drop_vb             | 5.0      | 59.56 | -5.74    | -8.790%        | 40.619 | -12.771  | -23.921%       | 67.346 | -2.064   | -2.974%        |
| drop_vb_nn          | 5.0      | 46.33 | -18.97   | -29.051%       | 28.685 | -24.705  | -46.273%       | 61.935 | -7.475   | -10.770%       |
| only_nn             | 5.0      | 35.72 | -29.58   | -45.299%       | 14.947 | -38.443  | -72.005%       | 57.873 | -11.537  | -16.622%       |
| only_vb             | 5.0      | 52.14 | -13.16   | -20.153%       | 36.262 | -17.128  | -32.081%       | 64.82  | -4.59    | -6.613%        |
| only_vb_nn          | 5.0      | 41.2  | -24.1    | -36.907%       | 25.37  | -28.02   | -52.482%       | 59.15  | -10.26   | -14.781%       |
| drop_rand_one_vb    | 5.0      | 63.54 | -1.76    | -2.695%        | 45.731 | -7.659   | -14.346%       | 68.824 | -0.586   | -0.844%        |
| drop_first          | 5.0      | 60.76 | -4.54    | -6.953%        | 42.495 | -10.895  | -20.407%       | 68.609 | -0.801   | -1.154%        |
| drop_last           | 5.0      | 54.49 | -10.81   | -16.554%       | 44.141 | -9.249   | -17.324%       | 67.045 | -2.365   | -3.408%        |
| drop_first_and_last | 5.0      | 47.37 | -17.93   | -27.458%       | 37.542 | -15.848  | -29.684%       | 66.399 | -3.011   | -4.338%        |
| shuffle_order       | 5.0      | 57.98 | -7.32    | -11.210%       | 37.717 | -15.673  | -29.356%       | 65.695 | -3.715   | -5.352%        |
| random_word_delete  | 5.0      | 46.07 | -19.23   | -29.449%       | 29.997 | -23.393  | -43.816%       | 62.437 | -6.973   | -10.046%       |
| swap_syn_word_emb   | 5.0      | 46.71 | -18.59   | -28.469%       | 32.962 | -20.428  | -38.261%       | 56.796 | -12.614  | -18.173%       |
| swap_syn_word_net   | 5.0      | 47.98 | -17.32   | -26.524%       | 34.385 | -19.005  | -35.596%       | 57.399 | -12.011  | -17.304%       |
| back_trans          | 5.0      | 61.77 | -3.53    | -5.406%        | 48.116 | -5.274   | -9.879%        | 69.14  | -0.27    | -0.389%        |
| random_word_swap    | 5.0      | 61.96 | -3.34    | -5.115%        | 44.037 | -9.353   | -17.518%       | 67.36  | -2.05    | -2.953%        |
| nonsense            | 5.0      | 24.34 | -40.96   | -62.726%       | 16.736 | -36.654  | -68.654%       | 51.443 | -17.967  | -25.886%       |

Table 32: Performance and decrease ratio of Multiple Compacters on CLIP-BART against text corruptions given severity 1 to 4.

| corruption          | severity | VQA   |          |                | GQA    |          |                | NLVR   |          |                |
|---------------------|----------|-------|----------|----------------|--------|----------|----------------|--------|----------|----------------|
|                     |          | Acc   | Decrease | Decrease Ratio | Acc    | Decrease | Decrease Ratio | CIDer  | Decrease | Decrease Ratio |
| ocr                 | 1.0      | 53.92 | -10.99   | -16.931%       | 42.026 | -10.724  | -20.330%       | 55.964 | -13.486  | -19.419%       |
| typos               | 1.0      | 56.2  | -8.71    | -13.419%       | 44.125 | -8.625   | -16.351%       | 67.303 | -2.147   | -3.091%        |
| keyboard            | 1.0      | 54.99 | -9.92    | -15.283%       | 43.091 | -9.659   | -18.311%       | 67.375 | -2.075   | -2.988%        |
| spell_error         | 1.0      | 55.79 | -9.12    | -14.050%       | 44.244 | -8.506   | -16.125%       | 67.073 | -2.377   | -3.422%        |
| random_char_insert  | 1.0      | 50.54 | -14.37   | -22.138%       | 35.244 | -17.506  | -33.187%       | 62.236 | -7.214   | -10.387%       |
| random_char_replace | 1.0      | 47.13 | -17.78   | -27.392%       | 32.104 | -20.646  | -39.140%       | 60.241 | -9.209   | -13.260%       |
| random_char_swap    | 1.0      | 40.85 | -24.06   | -37.067%       | 25.918 | -26.832  | -50.866%       | 55.792 | -13.658  | -19.667%       |
| random_char_delete  | 1.0      | 48.7  | -16.21   | -24.973%       | 33.439 | -19.311  | -36.608%       | 60.758 | -8.692   | -12.516%       |
| random_word_insert  | 1.0      | 64.94 | 0.03     | 0.046%         | 50.692 | -2.058   | -3.902%        | 69.226 | -0.224   | -0.322%        |
| random_word_delete  | 1.0      | 64.79 | -0.12    | -0.185%        | 51.248 | -1.502   | -2.847%        | 68.982 | -0.468   | -0.673%        |
| swap_syn_word_emb   | 1.0      | 55.51 | -9.4     | -14.482%       | 44.912 | -7.838   | -14.859%       | 65.337 | -4.113   | -5.923%        |
| swap_syn_word_net   | 1.0      | 57.54 | -7.37    | -11.354%       | 45.103 | -7.647   | -14.498%       | 67.289 | -2.161   | -3.112%        |
| random_word_swap    | 1.0      | 64.82 | -0.09    | -0.139%        | 51.741 | -1.009   | -1.913%        | 69.327 | -0.123   | -0.177%        |

  

| corruption          | severity | VQA   |          |                | GQA    |          |                | NLVR   |          |                |
|---------------------|----------|-------|----------|----------------|--------|----------|----------------|--------|----------|----------------|
|                     |          | Acc   | Decrease | Decrease Ratio | Acc    | Decrease | Decrease Ratio | CIDer  | Decrease | Decrease Ratio |
| ocr                 | 2.0      | 53.54 | -11.37   | -17.517%       | 38.361 | -14.389  | -27.278%       | 63.169 | -6.281   | -9.044%        |
| typos               | 2.0      | 54.82 | -10.09   | -15.545%       | 40.157 | -12.593  | -23.872%       | 64.361 | -5.089   | -7.328%        |
| keyboard            | 2.0      | 54.43 | -10.48   | -16.145%       | 39.736 | -13.014  | -24.671%       | 64.102 | -5.348   | -7.700%        |
| spell_error         | 2.0      | 54.95 | -9.96    | -15.344%       | 41.414 | -11.336  | -21.491%       | 64.274 | -5.176   | -7.452%        |
| random_char_insert  | 2.0      | 40.57 | -24.34   | -37.498%       | 25.791 | -26.959  | -51.107%       | 56.323 | -13.127  | -18.902%       |
| random_char_replace | 2.0      | 36.4  | -28.51   | -43.922%       | 22.786 | -29.964  | -56.804%       | 54.787 | -14.663  | -21.113%       |
| random_char_swap    | 2.0      | 31.96 | -32.95   | -50.763%       | 19.423 | -33.327  | -63.180%       | 52.074 | -17.376  | -25.019%       |
| random_char_delete  | 2.0      | 38.32 | -26.59   | -40.964%       | 24.591 | -28.159  | -53.383%       | 56.538 | -12.912  | -18.592%       |
| random_word_insert  | 2.0      | 64.31 | -0.6     | -0.924%        | 47.233 | -5.517   | -10.458%       | 68.767 | -0.683   | -0.983%        |
| random_word_delete  | 2.0      | 59.42 | -5.49    | -8.458%        | 45.134 | -7.616   | -14.437%       | 67.375 | -2.075   | -2.988%        |
| swap_syn_word_emb   | 2.0      | 54.98 | -9.93    | -15.298%       | 42.391 | -10.359  | -19.637%       | 61.418 | -8.032   | -11.565%       |
| swap_syn_word_net   | 2.0      | 56.96 | -7.95    | -12.248%       | 42.884 | -9.866   | -18.703%       | 64.662 | -4.788   | -6.894%        |
| random_word_swap    | 2.0      | 63.68 | -1.23    | -1.895%        | 49.189 | -3.561   | -6.751%        | 68.968 | -0.482   | -0.694%        |

  

| corruption          | severity | VQA   |          |                | GQA    |          |                | NLVR   |          |                |
|---------------------|----------|-------|----------|----------------|--------|----------|----------------|--------|----------|----------------|
|                     |          | Acc   | Decrease | Decrease Ratio | Acc    | Decrease | Decrease Ratio | CIDer  | Decrease | Decrease Ratio |
| ocr                 | 3.0      | 48.87 | -16.04   | -24.711%       | 31.595 | -21.155  | -40.105%       | 59.265 | -10.185  | -14.665%       |
| typos               | 3.0      | 50.18 | -14.73   | -22.693%       | 33.741 | -19.009  | -36.035%       | 61.016 | -8.434   | -12.144%       |
| keyboard            | 3.0      | 48.88 | -16.03   | -24.696%       | 32.446 | -20.304  | -38.492%       | 60.227 | -9.223   | -13.280%       |
| spell_error         | 3.0      | 49.82 | -15.09   | -23.248%       | 34.735 | -18.015  | -34.151%       | 60.657 | -8.793   | -12.660%       |
| random_char_insert  | 3.0      | 33.67 | -31.24   | -48.128%       | 21.482 | -31.268  | -59.276%       | 54.012 | -15.438  | -22.229%       |
| random_char_replace | 3.0      | 30.79 | -34.12   | -52.565%       | 19.614 | -33.136  | -62.818%       | 53.064 | -16.386  | -23.593%       |
| random_char_swap    | 3.0      | 28.51 | -36.4    | -56.078%       | 16.903 | -35.847  | -67.957%       | 51.242 | -18.208  | -26.218%       |
| random_char_delete  | 3.0      | 32.61 | -32.3    | -49.761%       | 20.027 | -32.723  | -62.034%       | 52.892 | -16.558  | -23.841%       |
| random_word_insert  | 3.0      | 63.9  | -1.01    | -1.556%        | 44.045 | -8.705   | -16.502%       | 67.834 | -1.616   | -2.327%        |
| random_word_delete  | 3.0      | 56.79 | -8.12    | -12.510%       | 40.237 | -12.513  | -23.721%       | 65.164 | -4.286   | -6.171%        |
| swap_syn_word_emb   | 3.0      | 51.14 | -13.77   | -21.214%       | 36.834 | -15.916  | -30.172%       | 58.906 | -10.544  | -15.182%       |
| swap_syn_word_net   | 3.0      | 53.25 | -11.66   | -17.963%       | 37.772 | -14.978  | -28.394%       | 61.605 | -7.845   | -11.296%       |
| random_word_swap    | 3.0      | 63.16 | -1.75    | -2.696%        | 47.567 | -5.183   | -9.825%        | 68.494 | -0.956   | -1.376%        |

  

| corruption          | severity | VQA   |          |                | GQA    |          |                | NLVR   |          |                |
|---------------------|----------|-------|----------|----------------|--------|----------|----------------|--------|----------|----------------|
|                     |          | Acc   | Decrease | Decrease Ratio | Acc    | Decrease | Decrease Ratio | CIDer  | Decrease | Decrease Ratio |
| ocr                 | 4.0      | 41.92 | -22.99   | -35.418%       | 25.934 | -26.816  | -50.836%       | 55.792 | -13.658  | -19.667%       |
| typos               | 4.0      | 41.66 | -23.25   | -35.819%       | 27.604 | -25.146  | -47.671%       | 57.873 | -11.577  | -16.670%       |
| keyboard            | 4.0      | 39.29 | -25.62   | -39.470%       | 25.688 | -27.062  | -51.303%       | 56.882 | -12.568  | -18.096%       |
| spell_error         | 4.0      | 41.32 | -23.59   | -36.343%       | 28.979 | -23.771  | -45.063%       | 57.012 | -12.438  | -17.910%       |
| random_char_insert  | 4.0      | 30.03 | -34.88   | -53.736%       | 18.795 | -33.955  | -64.370%       | 52.246 | -17.204  | -24.771%       |
| random_char_replace | 4.0      | 28.09 | -36.82   | -56.725%       | 17.077 | -35.673  | -67.626%       | 51.328 | -18.122  | -26.094%       |
| random_char_swap    | 4.0      | 26.72 | -38.19   | -58.835%       | 15.599 | -37.151  | -70.429%       | 51.313 | -18.137  | -26.115%       |
| random_char_delete  | 4.0      | 29.35 | -35.56   | -54.784%       | 17.523 | -35.227  | -66.782%       | 52.017 | -17.433  | -25.102%       |
| random_word_insert  | 4.0      | 62.39 | -2.52    | -3.882%        | 42.073 | -10.677  | -20.240%       | 67.748 | -1.702   | -2.451%        |
| random_word_delete  | 4.0      | 50.93 | -13.98   | -21.538%       | 34.823 | -17.927  | -33.985%       | 63.04  | -6.41    | -9.230%        |
| swap_syn_word_emb   | 4.0      | 47.52 | -17.39   | -26.791%       | 34.568 | -18.182  | -34.468%       | 57.801 | -11.649  | -16.773%       |
| swap_syn_word_net   | 4.0      | 49.86 | -15.05   | -23.186%       | 34.878 | -17.872  | -33.880%       | 59.323 | -10.127  | -14.582%       |
| random_word_swap    | 4.0      | 62.66 | -2.25    | -3.466%        | 46.526 | -6.224   | -11.800%       | 68.265 | -1.185   | -1.707%        |



Table 33: Performance and decrease ratio of Multiple Compacters on CLIP-BART against text corruptions given severity 5.

| corruption          | severity | VQA   |          |                | GQA    |          |                | NLVR   |          |                |
|---------------------|----------|-------|----------|----------------|--------|----------|----------------|--------|----------|----------------|
|                     |          | Acc   | Decrease | Decrease Ratio | Acc    | Decrease | Decrease Ratio | CIDer  | Decrease | Decrease Ratio |
| ocr                 | 5.0      | 38.61 | -26.3    | -40.518%       | 23.422 | -29.328  | -55.598%       | 53.538 | -15.912  | -22.911%       |
| punctuation         | 5.0      | 64.59 | -0.32    | -0.493%        | 51.685 | -1.065   | -2.018%        | 68.997 | -0.453   | -0.653%        |
| typos               | 5.0      | 29.7  | -35.21   | -54.244%       | 19.645 | -33.105  | -62.758%       | 51.486 | -17.964  | -25.867%       |
| keyboard            | 5.0      | 27.11 | -37.8    | -58.234%       | 18.564 | -34.186  | -64.807%       | 50.768 | -18.682  | -26.900%       |
| spell_error         | 5.0      | 34.81 | -30.1    | -46.372%       | 24.964 | -27.786  | -52.674%       | 54.385 | -15.065  | -21.692%       |
| random_char_insert  | 5.0      | 27.63 | -37.28   | -57.433%       | 17.888 | -34.862  | -66.088%       | 51.17  | -18.28   | -26.321%       |
| random_char_replace | 5.0      | 26.65 | -38.26   | -58.943%       | 16.64  | -36.11   | -68.455%       | 50.782 | -18.668  | -26.879%       |
| random_char_swap    | 5.0      | 26.26 | -38.65   | -59.544%       | 16.298 | -36.452  | -69.103%       | 52.045 | -17.405  | -25.061%       |
| random_char_delete  | 5.0      | 27.34 | -37.57   | -57.880%       | 16.107 | -36.643  | -69.464%       | 51.356 | -18.094  | -26.053%       |
| to_passive          | 5.0      | 62.46 | -2.45    | -3.774%        | 43.067 | -9.683   | -18.356%       | 67.317 | -2.133   | -3.071%        |
| tense               | 5.0      | 64.12 | -0.79    | -1.217%        | 52.473 | -0.277   | -0.526%        | 69.241 | -0.209   | -0.301%        |
| to_formal           | 5.0      | 64.44 | -0.47    | -0.724%        | 51.932 | -0.818   | -1.551%        | 69.628 | 0.178    | 0.257%         |
| to_casual           | 5.0      | 62.14 | -2.77    | -4.267%        | 45.707 | -7.043   | -13.352%       | 67.877 | -1.573   | -2.265%        |
| to_active           | 5.0      | 63.37 | -1.54    | -2.373%        | 48.887 | -3.863   | -7.323%        | 68.753 | -0.697   | -1.004%        |
| double_denial       | 5.0      | 64.82 | -0.09    | -0.139%        | 52.719 | -0.031   | -0.059%        | 69.442 | -0.008   | -0.012%        |
| insert_adv          | 5.0      | 61.69 | -3.22    | -4.961%        | 49.443 | -3.307   | -6.268%        | 68.078 | -1.372   | -1.975%        |
| append_irr          | 5.0      | 61.1  | -3.81    | -5.870%        | 46.995 | -5.755   | -10.910%       | 63.585 | -5.865   | -8.444%        |
| random_word_insert  | 5.0      | 60.19 | -4.72    | -7.272%        | 37.216 | -15.534  | -29.449%       | 67.059 | -2.391   | -3.443%        |
| drop_nn             | 5.0      | 46.48 | -18.43   | -28.393%       | 32.485 | -20.265  | -38.417%       | 63.643 | -5.807   | -8.362%        |
| drop_rand_one_nn    | 5.0      | 56.9  | -8.01    | -12.340%       | 44.467 | -8.283   | -15.703%       | 68.638 | -0.812   | -1.169%        |
| drop_vb             | 5.0      | 60.37 | -4.54    | -6.994%        | 34.91  | -17.84   | -33.820%       | 67.906 | -1.544   | -2.223%        |
| drop_vb_nn          | 5.0      | 47.84 | -17.07   | -26.298%       | 23.271 | -29.479  | -55.885%       | 61.964 | -7.486   | -10.780%       |
| only_nn             | 5.0      | 35.98 | -28.93   | -44.569%       | 16.314 | -36.436  | -69.073%       | 57.758 | -11.692  | -16.835%       |
| only_vb             | 5.0      | 52.59 | -12.32   | -18.980%       | 38.909 | -13.841  | -26.238%       | 64.906 | -4.544   | -6.543%        |
| only_vb_nn          | 5.0      | 41.42 | -23.49   | -36.189%       | 31.515 | -21.235  | -40.255%       | 60.442 | -9.008   | -12.970%       |
| drop_rand_one_vb    | 5.0      | 63.62 | -1.29    | -1.987%        | 41.907 | -10.843  | -20.556%       | 68.236 | -1.214   | -1.748%        |
| drop_first          | 5.0      | 58.62 | -6.29    | -9.690%        | 37.971 | -14.779  | -28.017%       | 68.322 | -1.128   | -1.624%        |
| drop_last           | 5.0      | 54.76 | -10.15   | -15.637%       | 46.041 | -6.709   | -12.719%       | 67.777 | -1.673   | -2.409%        |
| drop_first_and_last | 5.0      | 45.91 | -19.0    | -29.271%       | 33.201 | -19.549  | -37.060%       | 66.298 | -3.152   | -4.538%        |
| shuffle_order       | 5.0      | 57.91 | -7.0     | -10.784%       | 39.362 | -13.388  | -25.379%       | 64.992 | -4.458   | -6.419%        |
| random_word_delete  | 5.0      | 45.22 | -19.69   | -30.334%       | 29.059 | -23.691  | -44.912%       | 61.72  | -7.73    | -11.131%       |
| swap_syn_word_emb   | 5.0      | 46.64 | -18.27   | -28.147%       | 33.527 | -19.223  | -36.442%       | 57.17  | -12.28   | -17.682%       |
| swap_syn_word_net   | 5.0      | 46.98 | -17.93   | -27.623%       | 33.487 | -19.263  | -36.517%       | 57.227 | -12.223  | -17.600%       |
| back_trans          | 5.0      | 61.57 | -3.34    | -5.146%        | 49.149 | -3.601   | -6.826%        | 68.451 | -0.999   | -1.438%        |
| random_word_swap    | 5.0      | 61.73 | -3.18    | -4.899%        | 45.047 | -7.703   | -14.603%       | 66.628 | -2.822   | -4.063%        |
| nonsense            | 5.0      | 18.95 | -45.96   | -70.806%       | 4.023  | -48.727  | -92.374%       | 51.012 | -18.438  | -26.549%       |

Table 34: Performance and decrease ratio of Multiple LoRA on CLIP-BART against text corruptions given severity 1 to 4.

| corruption          | severity | VQA   |          |                | GQA    |          |                | NLVR   |          |                |
|---------------------|----------|-------|----------|----------------|--------|----------|----------------|--------|----------|----------------|
|                     |          | Acc   | Decrease | Decrease Ratio | Acc    | Decrease | Decrease Ratio | CIDer  | Decrease | Decrease Ratio |
| ocr                 | 1.0      | 53.63 | -11.81   | -18.047%       | 41.469 | -10.581  | -20.328%       | 51.213 | -0.107   | -0.209%        |
| typos               | 1.0      | 55.85 | -9.59    | -14.655%       | 43.282 | -8.768   | -16.845%       | 51.084 | -0.236   | -0.460%        |
| keyboard            | 1.0      | 54.8  | -10.64   | -16.259%       | 42.225 | -9.825   | -18.877%       | 51.17  | -0.15    | -0.293%        |
| spell_error         | 1.0      | 55.58 | -9.86    | -15.067%       | 44.021 | -8.029   | -15.425%       | 51.055 | -0.265   | -0.516%        |
| random_char_insert  | 1.0      | 50.71 | -14.73   | -22.509%       | 34.473 | -17.577  | -33.770%       | 51.428 | 0.108    | 0.211%         |
| random_char_replace | 1.0      | 47.34 | -18.1    | -27.659%       | 31.213 | -20.837  | -40.032%       | 51.313 | -0.007   | -0.013%        |
| random_char_swap    | 1.0      | 40.74 | -24.7    | -37.744%       | 25.004 | -27.046  | -51.962%       | 51.141 | -0.179   | -0.349%        |
| random_char_delete  | 1.0      | 49.25 | -16.19   | -24.740%       | 32.803 | -19.247  | -36.977%       | 51.5   | 0.18     | 0.351%         |
| random_word_insert  | 1.0      | 65.36 | -0.08    | -0.122%        | 50.302 | -1.748   | -3.358%        | 51.859 | 0.539    | 1.050%         |
| random_word_delete  | 1.0      | 65.24 | -0.2     | -0.306%        | 50.62  | -1.43    | -2.747%        | 51.572 | 0.252    | 0.490%         |
| swap_syn_word_emb   | 1.0      | 55.34 | -10.1    | -15.434%       | 44.641 | -7.409   | -14.234%       | 51.572 | 0.252    | 0.490%         |
| swap_syn_word_net   | 1.0      | 57.92 | -7.52    | -11.491%       | 44.482 | -7.568   | -14.539%       | 51.299 | -0.021   | -0.041%        |
| random_word_swap    | 1.0      | 65.33 | -0.11    | -0.168%        | 51.105 | -0.945   | -1.815%        | 51.127 | -0.193   | -0.377%        |

  

| corruption          | severity | VQA   |          |                | GQA    |          |                | NLVR   |          |                |
|---------------------|----------|-------|----------|----------------|--------|----------|----------------|--------|----------|----------------|
|                     |          | Acc   | Decrease | Decrease Ratio | Acc    | Decrease | Decrease Ratio | CIDer  | Decrease | Decrease Ratio |
| ocr                 | 2.0      | 53.02 | -12.42   | -18.979%       | 37.287 | -14.763  | -28.362%       | 51.155 | -0.165   | -0.321%        |
| typos               | 2.0      | 54.39 | -11.05   | -16.886%       | 39.354 | -12.696  | -24.391%       | 51.5   | 0.18     | 0.351%         |
| keyboard            | 2.0      | 54.21 | -11.23   | -17.161%       | 38.186 | -13.864  | -26.636%       | 51.399 | 0.079    | 0.155%         |
| spell_error         | 2.0      | 54.77 | -10.67   | -16.305%       | 40.801 | -11.249  | -21.611%       | 51.385 | 0.065    | 0.127%         |
| random_char_insert  | 2.0      | 40.53 | -24.91   | -38.065%       | 25.195 | -26.855  | -51.595%       | 51.586 | 0.266    | 0.518%         |
| random_char_replace | 2.0      | 36.61 | -28.83   | -44.056%       | 22.229 | -29.821  | -57.292%       | 52.045 | 0.725    | 1.413%         |
| random_char_swap    | 2.0      | 31.8  | -33.64   | -51.406%       | 19.264 | -32.786  | -62.990%       | 50.567 | -0.753   | -1.467%        |
| random_char_delete  | 2.0      | 38.65 | -26.79   | -40.938%       | 24.193 | -27.857  | -53.520%       | 51.227 | -0.093   | -0.181%        |
| random_word_insert  | 2.0      | 63.77 | -1.67    | -2.552%        | 47.408 | -4.642   | -8.918%        | 51.758 | 0.438    | 0.854%         |
| random_word_delete  | 2.0      | 60.07 | -5.37    | -8.206%        | 45.095 | -6.955   | -13.363%       | 51.184 | -0.136   | -0.265%        |
| swap_syn_word_emb   | 2.0      | 54.66 | -10.78   | -16.473%       | 40.992 | -11.058  | -21.245%       | 51.17  | -0.15    | -0.293%        |
| swap_syn_word_net   | 2.0      | 57.28 | -8.16    | -12.469%       | 41.724 | -10.326  | -19.839%       | 51.371 | 0.051    | 0.099%         |
| random_word_swap    | 2.0      | 64.59 | -0.85    | -1.299%        | 48.553 | -3.497   | -6.718%        | 51.098 | -0.222   | -0.433%        |

  

| corruption          | severity | VQA   |          |                | GQA    |          |                | NLVR   |          |                |
|---------------------|----------|-------|----------|----------------|--------|----------|----------------|--------|----------|----------------|
|                     |          | Acc   | Decrease | Decrease Ratio | Acc    | Decrease | Decrease Ratio | CIDer  | Decrease | Decrease Ratio |
| ocr                 | 3.0      | 47.96 | -17.48   | -26.711%       | 30.156 | -21.894  | -42.064%       | 50.926 | -0.394   | -0.768%        |
| typos               | 3.0      | 49.17 | -16.27   | -24.862%       | 32.779 | -19.271  | -37.023%       | 51.514 | 0.194    | 0.379%         |
| keyboard            | 3.0      | 48.31 | -17.13   | -26.177%       | 30.553 | -21.497  | -41.300%       | 51.242 | -0.078   | -0.153%        |
| spell_error         | 3.0      | 49.66 | -15.78   | -24.114%       | 34.075 | -17.975  | -34.533%       | 50.811 | -0.509   | -0.992%        |
| random_char_insert  | 3.0      | 33.64 | -31.8    | -48.594%       | 20.806 | -31.244  | -60.027%       | 52.146 | 0.826    | 1.609%         |
| random_char_replace | 3.0      | 30.81 | -34.63   | -52.919%       | 20.194 | -31.856  | -61.203%       | 51.945 | 0.625    | 1.218%         |
| random_char_swap    | 3.0      | 28.23 | -37.21   | -56.861%       | 18.071 | -33.979  | -65.281%       | 51.041 | -0.279   | -0.544%        |
| random_char_delete  | 3.0      | 32.98 | -32.46   | -49.603%       | 20.512 | -31.538  | -60.592%       | 50.696 | -0.624   | -1.216%        |
| random_word_insert  | 3.0      | 61.88 | -3.56    | -5.440%        | 43.83  | -8.22    | -15.792%       | 52.175 | 0.855    | 1.665%         |
| random_word_delete  | 3.0      | 57.3  | -8.14    | -12.439%       | 40.483 | -11.567  | -22.222%       | 51.055 | -0.265   | -0.516%        |
| swap_syn_word_emb   | 3.0      | 51.07 | -14.37   | -21.959%       | 35.316 | -16.734  | -32.151%       | 51.285 | -0.035   | -0.069%        |
| swap_syn_word_net   | 3.0      | 53.97 | -11.47   | -17.528%       | 36.23  | -15.82   | -30.394%       | 51.313 | -0.007   | -0.013%        |
| random_word_swap    | 3.0      | 63.86 | -1.58    | -2.414%        | 46.693 | -5.357   | -10.293%       | 51.342 | 0.022    | 0.043%         |

  

| corruption          | severity | VQA   |          |                | GQA    |          |                | NLVR   |          |                |
|---------------------|----------|-------|----------|----------------|--------|----------|----------------|--------|----------|----------------|
|                     |          | Acc   | Decrease | Decrease Ratio | Acc    | Decrease | Decrease Ratio | CIDer  | Decrease | Decrease Ratio |
| ocr                 | 4.0      | 41.18 | -24.26   | -37.072%       | 24.4   | -27.65   | -53.122%       | 50.883 | -0.437   | -0.852%        |
| typos               | 4.0      | 40.5  | -24.94   | -38.111%       | 26.475 | -25.575  | -49.136%       | 51.643 | 0.323    | 0.630%         |
| keyboard            | 4.0      | 38.82 | -26.62   | -40.678%       | 24.32  | -27.73   | -53.275%       | 51.213 | -0.107   | -0.209%        |
| spell_error         | 4.0      | 41.1  | -24.34   | -37.194%       | 27.492 | -24.558  | -47.181%       | 51.098 | -0.222   | -0.433%        |
| random_char_insert  | 4.0      | 29.92 | -35.52   | -54.279%       | 19.113 | -32.937  | -63.280%       | 51.141 | -0.179   | -0.349%        |
| random_char_replace | 4.0      | 27.87 | -37.57   | -57.411%       | 18.771 | -33.279  | -63.937%       | 51.127 | -0.193   | -0.377%        |
| random_char_swap    | 4.0      | 26.59 | -38.85   | -59.367%       | 17.022 | -35.028  | -67.297%       | 51.242 | -0.078   | -0.153%        |
| random_char_delete  | 4.0      | 29.93 | -35.51   | -54.263%       | 17.92  | -34.13   | -65.571%       | 50.553 | -0.767   | -1.495%        |
| random_word_insert  | 4.0      | 58.79 | -6.65    | -10.162%       | 40.523 | -11.527  | -22.146%       | 51.758 | 0.438    | 0.854%         |
| random_word_delete  | 4.0      | 51.38 | -14.06   | -21.485%       | 35.085 | -16.965  | -32.594%       | 50.581 | -0.739   | -1.439%        |
| swap_syn_word_emb   | 4.0      | 47.16 | -18.28   | -27.934%       | 32.342 | -19.708  | -37.863%       | 51.672 | 0.352    | 0.686%         |
| swap_syn_word_net   | 4.0      | 50.08 | -15.36   | -23.472%       | 33.217 | -18.833  | -36.183%       | 51.199 | -0.121   | -0.237%        |
| random_word_swap    | 4.0      | 63.24 | -2.2     | -3.362%        | 45.659 | -6.391   | -12.278%       | 51.17  | -0.15    | -0.293%        |

Table 35: Performance and decrease ratio of Multiple LoRA on CLIP-BART against text corruptions given severity 5.

| corruption          | severity | VQA   |          |                | GQA    |          |                | NLVR   |          |                |
|---------------------|----------|-------|----------|----------------|--------|----------|----------------|--------|----------|----------------|
|                     |          | Acc   | Decrease | Decrease Ratio | Acc    | Decrease | Decrease Ratio | CIDer  | Decrease | Decrease Ratio |
| ocr                 | 5.0      | 37.98 | -27.46   | -41.962%       | 21.959 | -30.091  | -57.812%       | 51.356 | 0.036    | 0.071%         |
| punctuation         | 5.0      | 64.86 | -0.58    | -0.886%        | 51.208 | -0.842   | -1.617%        | 51.342 | 0.022    | 0.043%         |
| typos               | 5.0      | 29.5  | -35.94   | -54.921%       | 18.668 | -33.382  | -64.135%       | 50.682 | -0.638   | -1.244%        |
| keyboard            | 5.0      | 27.3  | -38.14   | -58.282%       | 17.356 | -34.694  | -66.656%       | 51.658 | 0.338    | 0.658%         |
| spell_error         | 5.0      | 34.57 | -30.87   | -47.173%       | 23.39  | -28.66   | -55.062%       | 51.17  | -0.15    | -0.293%        |
| random_char_insert  | 5.0      | 27.81 | -37.63   | -57.503%       | 18.389 | -33.661  | -64.670%       | 51.844 | 0.524    | 1.022%         |
| random_char_replace | 5.0      | 26.16 | -39.28   | -60.024%       | 18.365 | -33.685  | -64.716%       | 51.371 | 0.051    | 0.099%         |
| random_char_swap    | 5.0      | 26.04 | -39.4    | -60.208%       | 18.485 | -33.565  | -64.487%       | 52.175 | 0.855    | 1.665%         |
| random_char_delete  | 5.0      | 27.41 | -38.03   | -58.114%       | 17.268 | -34.782  | -66.824%       | 51.055 | -0.265   | -0.516%        |
| to_passive          | 5.0      | 62.8  | -2.64    | -4.034%        | 43.95  | -8.1     | -15.562%       | 51.572 | 0.252    | 0.490%         |
| tense               | 5.0      | 64.6  | -0.84    | -1.284%        | 51.654 | -0.396   | -0.761%        | 51.242 | -0.078   | -0.153%        |
| to_formal           | 5.0      | 64.99 | -0.45    | -0.688%        | 51.296 | -0.754   | -1.449%        | 51.184 | -0.136   | -0.265%        |
| to_casual           | 5.0      | 62.47 | -2.97    | -4.539%        | 45.484 | -6.566   | -12.614%       | 50.352 | -0.968   | -1.887%        |
| to_active           | 5.0      | 63.37 | -2.07    | -3.163%        | 48.466 | -3.584   | -6.887%        | 51.299 | -0.021   | -0.041%        |
| double_denial       | 5.0      | 65.34 | -0.1     | -0.153%        | 52.035 | -0.015   | -0.028%        | 51.328 | 0.008    | 0.015%         |
| insert_adv          | 5.0      | 61.41 | -4.03    | -6.158%        | 48.521 | -3.529   | -6.780%        | 51.141 | -0.179   | -0.349%        |
| append_irr          | 5.0      | 59.52 | -5.92    | -9.046%        | 45.611 | -6.439   | -12.370%       | 51.428 | 0.108    | 0.211%         |
| random_word_insert  | 5.0      | 55.27 | -10.17   | -15.541%       | 36.047 | -16.003  | -30.745%       | 51.443 | 0.123    | 0.239%         |
| drop_nn             | 5.0      | 45.07 | -20.37   | -31.128%       | 31.34  | -20.71   | -39.788%       | 51.328 | 0.008    | 0.015%         |
| drop_rand_one_nn    | 5.0      | 56.58 | -8.86    | -13.539%       | 43.767 | -8.283   | -15.914%       | 51.256 | -0.064   | -0.125%        |
| drop_vb             | 5.0      | 58.68 | -6.76    | -10.330%       | 40.658 | -11.392  | -21.886%       | 51.974 | 0.654    | 1.274%         |
| drop_vb_nn          | 5.0      | 44.94 | -20.5    | -31.326%       | 27.818 | -24.232  | -46.554%       | 52.146 | 0.826    | 1.609%         |
| only_nn             | 5.0      | 27.0  | -38.44   | -58.741%       | 22.508 | -29.542  | -56.758%       | 52.175 | 0.855    | 1.665%         |
| only_vb             | 5.0      | 50.54 | -14.9    | -22.769%       | 38.162 | -13.888  | -26.682%       | 51.658 | 0.338    | 0.658%         |
| only_vb_nn          | 5.0      | 29.47 | -35.97   | -54.966%       | 27.596 | -24.454  | -46.982%       | 52.002 | 0.682    | 1.329%         |
| drop_rand_one_vb    | 5.0      | 63.16 | -2.28    | -3.484%        | 46.176 | -5.874   | -11.286%       | 51.916 | 0.596    | 1.162%         |
| drop_first          | 5.0      | 45.9  | -19.54   | -29.859%       | 42.113 | -9.937   | -19.091%       | 51.6   | 0.28     | 0.546%         |
| drop_last           | 5.0      | 53.95 | -11.49   | -17.558%       | 44.999 | -7.051   | -13.546%       | 51.5   | 0.18     | 0.351%         |
| drop_first_and_last | 5.0      | 34.39 | -31.05   | -47.448%       | 36.214 | -15.836  | -30.425%       | 51.356 | 0.036    | 0.071%         |
| shuffle_order       | 5.0      | 59.74 | -5.7     | -8.710%        | 38.909 | -13.141  | -25.246%       | 51.098 | -0.222   | -0.433%        |
| random_word_delete  | 5.0      | 45.47 | -19.97   | -30.517%       | 29.369 | -22.681  | -43.576%       | 51.184 | -0.136   | -0.265%        |
| swap_syn_word_emb   | 5.0      | 46.29 | -19.15   | -29.263%       | 30.665 | -21.385  | -41.086%       | 51.055 | -0.265   | -0.516%        |
| swap_syn_word_net   | 5.0      | 48.52 | -16.92   | -25.856%       | 31.849 | -20.201  | -38.810%       | 51.055 | -0.265   | -0.516%        |
| back_trans          | 5.0      | 62.07 | -3.37    | -5.150%        | 48.179 | -3.871   | -7.436%        | 51.744 | 0.424    | 0.826%         |
| random_word_swap    | 5.0      | 62.66 | -2.78    | -4.248%        | 44.395 | -7.655   | -14.707%       | 51.371 | 0.051    | 0.099%         |
| nonsense            | 5.0      | 8.37  | -57.07   | -87.210%       | 13.77  | -38.28   | -73.545%       | 50.797 | -0.523   | -1.020%        |

Table 36: Performance and decrease ratio of Multiple Prompts on CLIP-BART against text corruptions given severity 1 to 4.

| corruption          | severity | VQA   |          |                | GQA    |          |                | CIDer  | NLVR     |                |
|---------------------|----------|-------|----------|----------------|--------|----------|----------------|--------|----------|----------------|
|                     |          | Acc   | Decrease | Decrease Ratio | Acc    | Decrease | Decrease Ratio |        | Decrease | Decrease Ratio |
| ocr                 | 1.0      | 41.44 | -5.37    | -11.472%       | 29.758 | -4.252   | -12.501%       | 50.251 | 0.381    | 0.764%         |
| typos               | 1.0      | 39.78 | -7.03    | -15.018%       | 29.599 | -4.411   | -12.969%       | 49.978 | 0.108    | 0.218%         |
| keyboard            | 1.0      | 39.47 | -7.34    | -15.680%       | 29.48  | -4.53    | -13.319%       | 49.978 | 0.108    | 0.218%         |
| spell_error         | 1.0      | 39.38 | -7.43    | -15.873%       | 30.259 | -3.751   | -11.029%       | 49.921 | 0.051    | 0.102%         |
| random_char_insert  | 1.0      | 38.69 | -8.12    | -17.347%       | 26.244 | -7.766   | -22.834%       | 50.452 | 0.582    | 1.167%         |
| random_char_replace | 1.0      | 37.03 | -9.78    | -20.893%       | 24.575 | -9.435   | -27.743%       | 50.754 | 0.884    | 1.772%         |
| random_char_swap    | 1.0      | 33.51 | -13.3    | -28.413%       | 21.387 | -12.623  | -37.117%       | 50.194 | 0.324    | 0.649%         |
| random_char_delete  | 1.0      | 37.19 | -9.62    | -20.551%       | 24.36  | -9.65    | -28.374%       | 49.878 | 0.008    | 0.016%         |
| random_word_insert  | 1.0      | 46.83 | 0.02     | 0.043%         | 33.455 | -0.555   | -1.631%        | 49.892 | 0.022    | 0.045%         |
| random_word_delete  | 1.0      | 46.69 | -0.12    | -0.256%        | 33.59  | -0.42    | -1.234%        | 49.964 | 0.094    | 0.189%         |
| swap_syn_word_emb   | 1.0      | 43.73 | -3.08    | -6.580%        | 31.468 | -2.542   | -7.475%        | 49.921 | 0.051    | 0.102%         |
| swap_syn_word_net   | 1.0      | 44.91 | -1.9     | -4.059%        | 30.752 | -3.258   | -9.579%        | 49.964 | 0.094    | 0.189%         |
| random_word_swap    | 1.0      | 46.77 | -0.04    | -0.085%        | 33.821 | -0.189   | -0.556%        | 50.036 | 0.166    | 0.333%         |

  

| corruption          | severity | VQA   |          |                | GQA    |          |                | CIDer  | NLVR     |                |
|---------------------|----------|-------|----------|----------------|--------|----------|----------------|--------|----------|----------------|
|                     |          | Acc   | Decrease | Decrease Ratio | Acc    | Decrease | Decrease Ratio |        | Decrease | Decrease Ratio |
| ocr                 | 2.0      | 41.17 | -5.64    | -12.049%       | 28.462 | -5.548   | -16.312%       | 50.079 | 0.209    | 0.419%         |
| typos               | 2.0      | 39.39 | -7.42    | -15.851%       | 28.423 | -5.587   | -16.429%       | 49.95  | 0.08     | 0.160%         |
| keyboard            | 2.0      | 38.83 | -7.98    | -17.048%       | 28.089 | -5.921   | -17.410%       | 50.495 | 0.625    | 1.254%         |
| spell_error         | 2.0      | 38.87 | -7.94    | -16.962%       | 28.669 | -5.341   | -15.704%       | 49.433 | -0.437   | -0.876%        |
| random_char_insert  | 2.0      | 33.92 | -12.89   | -27.537%       | 21.657 | -12.353  | -36.322%       | 50.409 | 0.539    | 1.081%         |
| random_char_replace | 2.0      | 31.53 | -15.28   | -32.643%       | 20.178 | -13.832  | -40.670%       | 50.725 | 0.855    | 1.714%         |
| random_char_swap    | 2.0      | 28.86 | -17.95   | -38.347%       | 18.357 | -15.653  | -46.023%       | 50.022 | 0.152    | 0.304%         |
| random_char_delete  | 2.0      | 31.78 | -15.03   | -32.109%       | 20.536 | -13.474  | -39.618%       | 50.194 | 0.324    | 0.649%         |
| random_word_insert  | 2.0      | 45.83 | -0.98    | -2.094%        | 31.953 | -2.057   | -6.049%        | 50.079 | 0.209    | 0.419%         |
| random_word_delete  | 2.0      | 42.35 | -4.46    | -9.528%        | 31.102 | -2.908   | -8.551%        | 49.734 | -0.136   | -0.272%        |
| swap_syn_word_emb   | 2.0      | 43.35 | -3.46    | -7.392%        | 29.416 | -4.594   | -13.506%       | 49.935 | 0.065    | 0.131%         |
| swap_syn_word_net   | 2.0      | 44.62 | -2.19    | -4.678%        | 29.814 | -4.196   | -12.338%       | 49.763 | -0.107   | -0.214%        |
| random_word_swap    | 2.0      | 46.18 | -0.63    | -1.346%        | 33.479 | -0.531   | -1.561%        | 49.907 | 0.037    | 0.074%         |

  

| corruption          | severity | VQA   |          |                | GQA    |          |                | CIDer  | NLVR     |                |
|---------------------|----------|-------|----------|----------------|--------|----------|----------------|--------|----------|----------------|
|                     |          | Acc   | Decrease | Decrease Ratio | Acc    | Decrease | Decrease Ratio |        | Decrease | Decrease Ratio |
| ocr                 | 3.0      | 38.72 | -8.09    | -17.283%       | 24.781 | -9.229   | -27.135%       | 49.878 | 0.008    | 0.016%         |
| typos               | 3.0      | 36.34 | -10.47   | -22.367%       | 24.805 | -9.205   | -27.065%       | 50.05  | 0.18     | 0.361%         |
| keyboard            | 3.0      | 35.76 | -11.05   | -23.606%       | 24.495 | -9.515   | -27.977%       | 49.935 | 0.065    | 0.131%         |
| spell_error         | 3.0      | 35.55 | -11.26   | -24.055%       | 25.258 | -8.752   | -25.732%       | 49.892 | 0.022    | 0.045%         |
| random_char_insert  | 3.0      | 30.25 | -16.56   | -35.377%       | 19.645 | -14.365  | -42.236%       | 49.821 | -0.049   | -0.099%        |
| random_char_replace | 3.0      | 28.76 | -18.05   | -38.560%       | 18.898 | -15.112  | -44.434%       | 50.266 | 0.396    | 0.793%         |
| random_char_swap    | 3.0      | 27.14 | -19.67   | -42.021%       | 17.602 | -16.408  | -48.244%       | 49.763 | -0.107   | -0.214%        |
| random_char_delete  | 3.0      | 28.88 | -17.93   | -38.304%       | 18.524 | -15.486  | -45.532%       | 50.366 | 0.496    | 0.995%         |
| random_word_insert  | 3.0      | 45.27 | -1.54    | -3.290%        | 30.649 | -3.361   | -9.883%        | 50.51  | 0.64     | 1.282%         |
| random_word_delete  | 3.0      | 40.34 | -6.47    | -13.822%       | 29.377 | -4.633   | -13.623%       | 49.993 | 0.123    | 0.246%         |
| swap_syn_word_emb   | 3.0      | 41.79 | -5.02    | -10.724%       | 26.586 | -7.424   | -21.829%       | 49.978 | 0.108    | 0.218%         |
| swap_syn_word_net   | 3.0      | 43.28 | -3.53    | -7.541%        | 27.397 | -6.613   | -19.444%       | 50.108 | 0.238    | 0.477%         |
| random_word_swap    | 3.0      | 45.65 | -1.16    | -2.478%        | 33.018 | -0.992   | -2.917%        | 50.122 | 0.252    | 0.505%         |

  

| corruption          | severity | VQA   |          |                | GQA    |          |                | CIDer  | NLVR     |                |
|---------------------|----------|-------|----------|----------------|--------|----------|----------------|--------|----------|----------------|
|                     |          | Acc   | Decrease | Decrease Ratio | Acc    | Decrease | Decrease Ratio |        | Decrease | Decrease Ratio |
| ocr                 | 4.0      | 34.95 | -11.86   | -25.336%       | 21.919 | -12.091  | -35.551%       | 50.38  | 0.51     | 1.023%         |
| typos               | 4.0      | 32.05 | -14.76   | -31.532%       | 21.657 | -12.353  | -36.322%       | 50.782 | 0.912    | 1.829%         |
| keyboard            | 4.0      | 30.97 | -15.84   | -33.839%       | 21.076 | -12.934  | -38.029%       | 50.366 | 0.496    | 0.995%         |
| spell_error         | 4.0      | 31.32 | -15.49   | -33.091%       | 21.903 | -12.107  | -35.597%       | 49.964 | 0.094    | 0.189%         |
| random_char_insert  | 4.0      | 28.93 | -17.88   | -38.197%       | 18.787 | -15.223  | -44.761%       | 50.309 | 0.439    | 0.879%         |
| random_char_replace | 4.0      | 27.32 | -19.49   | -41.636%       | 18.278 | -15.732  | -46.257%       | 49.964 | 0.094    | 0.189%         |
| random_char_swap    | 4.0      | 26.13 | -20.68   | -44.179%       | 17.332 | -16.678  | -49.039%       | 49.763 | -0.107   | -0.214%        |
| random_char_delete  | 4.0      | 27.23 | -19.58   | -41.829%       | 17.65  | -16.36   | -48.104%       | 50.136 | 0.266    | 0.534%         |
| random_word_insert  | 4.0      | 44.37 | -2.44    | -5.213%        | 29.138 | -4.872   | -14.325%       | 50.954 | 1.084    | 2.175%         |
| random_word_delete  | 4.0      | 36.63 | -10.18   | -21.747%       | 27.325 | -6.685   | -19.655%       | 49.835 | -0.035   | -0.070%        |
| swap_syn_word_emb   | 4.0      | 40.46 | -6.35    | -13.565%       | 25.473 | -8.537   | -25.101%       | 49.821 | -0.049   | -0.099%        |
| swap_syn_word_net   | 4.0      | 42.49 | -4.32    | -9.229%        | 26.053 | -7.957   | -23.395%       | 50.395 | 0.525    | 1.052%         |
| random_word_swap    | 4.0      | 45.21 | -1.6     | -3.418%        | 32.819 | -1.191   | -3.501%        | 49.864 | -0.006   | -0.013%        |

Table 37: Performance and decrease ratio of Multiple Prompts on CLIP-BART against text corruptions given severity 5.

| corruption          | severity | VQA   |          |                | GQA    |          |                | NLVR   |          |                |
|---------------------|----------|-------|----------|----------------|--------|----------|----------------|--------|----------|----------------|
|                     |          | Acc   | Decrease | Decrease Ratio | Acc    | Decrease | Decrease Ratio | CIDer  | Decrease | Decrease Ratio |
| ocr                 | 5.0      | 32.66 | -14.15   | -30.229%       | 20.496 | -13.514  | -39.735%       | 50.093 | 0.223    | 0.448%         |
| punctuation         | 5.0      | 45.08 | -1.73    | -3.696%        | 33.344 | -0.666   | -1.958%        | 50.065 | 0.195    | 0.390%         |
| typos               | 5.0      | 26.63 | -20.18   | -43.110%       | 16.855 | -17.155  | -50.442%       | 49.849 | -0.021   | -0.042%        |
| keyboard            | 5.0      | 25.78 | -21.03   | -44.926%       | 15.789 | -18.221  | -53.574%       | 50.553 | 0.683    | 1.369%         |
| spell_error         | 5.0      | 28.07 | -18.74   | -40.034%       | 19.28  | -14.73   | -43.312%       | 50.596 | 0.726    | 1.455%         |
| random_char_insert  | 5.0      | 27.32 | -19.49   | -41.636%       | 18.19  | -15.82   | -46.514%       | 49.835 | -0.035   | -0.070%        |
| random_char_replace | 5.0      | 26.41 | -20.4    | -43.580%       | 17.721 | -16.289  | -47.894%       | 50.395 | 0.525    | 1.052%         |
| random_char_swap    | 5.0      | 25.71 | -21.1    | -45.076%       | 18.016 | -15.994  | -47.029%       | 49.519 | -0.351   | -0.704%        |
| random_char_delete  | 5.0      | 26.47 | -20.34   | -43.452%       | 17.515 | -16.495  | -48.501%       | 49.95  | 0.08     | 0.160%         |
| to_passive          | 5.0      | 43.64 | -3.17    | -6.772%        | 27.508 | -6.502   | -19.117%       | 49.706 | -0.164   | -0.329%        |
| tense               | 5.0      | 46.64 | -0.17    | -0.363%        | 33.837 | -0.173   | -0.509%        | 49.821 | -0.049   | -0.099%        |
| to_formal           | 5.0      | 46.62 | -0.19    | -0.406%        | 33.718 | -0.292   | -0.860%        | 49.95  | 0.08     | 0.160%         |
| to_casual           | 5.0      | 43.71 | -3.1     | -6.623%        | 28.073 | -5.937   | -17.457%       | 49.978 | 0.108    | 0.218%         |
| to_active           | 5.0      | 44.44 | -2.37    | -5.063%        | 31.778 | -2.232   | -6.564%        | 49.734 | -0.136   | -0.272%        |
| double_denial       | 5.0      | 46.79 | -0.02    | -0.043%        | 34.012 | 0.002    | 0.005%         | 49.878 | 0.008    | 0.016%         |
| insert_adv          | 5.0      | 45.23 | -1.58    | -3.375%        | 32.931 | -1.079   | -3.174%        | 49.964 | 0.094    | 0.189%         |
| append_irr          | 5.0      | 35.62 | -11.19   | -23.905%       | 27.699 | -6.311   | -18.556%       | 50.165 | 0.295    | 0.592%         |
| random_word_insert  | 5.0      | 43.28 | -3.53    | -7.541%        | 27.5   | -6.51    | -19.140%       | 50.452 | 0.582    | 1.167%         |
| drop_nn             | 5.0      | 40.11 | -6.7     | -14.313%       | 24.789 | -9.221   | -27.112%       | 50.28  | 0.41     | 0.822%         |
| drop_rand_one_nn    | 5.0      | 43.3  | -3.51    | -7.498%        | 30.728 | -3.282   | -9.649%        | 50.036 | 0.166    | 0.333%         |
| drop_vb             | 5.0      | 44.87 | -1.94    | -4.144%        | 27.238 | -6.772   | -19.912%       | 50.022 | 0.152    | 0.304%         |
| drop_vb_nn          | 5.0      | 41.13 | -5.68    | -12.134%       | 22.333 | -11.677  | -34.335%       | 50.151 | 0.281    | 0.563%         |
| only_nn             | 5.0      | 27.59 | -19.22   | -41.060%       | 22.261 | -11.749  | -34.545%       | 50.251 | 0.381    | 0.764%         |
| only_vb             | 5.0      | 38.75 | -8.06    | -17.219%       | 27.174 | -6.836   | -20.099%       | 50.28  | 0.41     | 0.822%         |
| only_vb_nn          | 5.0      | 26.41 | -20.4    | -43.580%       | 24.384 | -9.626   | -28.304%       | 50.366 | 0.496    | 0.995%         |
| drop_rand_one_vb    | 5.0      | 46.18 | -0.63    | -1.346%        | 29.909 | -4.101   | -12.057%       | 49.935 | 0.065    | 0.131%         |
| drop_first          | 5.0      | 27.59 | -19.22   | -41.060%       | 26.96  | -7.05    | -20.730%       | 50.208 | 0.338    | 0.678%         |
| drop_last           | 5.0      | 45.33 | -1.48    | -3.162%        | 31.778 | -2.232   | -6.564%        | 50.165 | 0.295    | 0.592%         |
| drop_first_and_last | 5.0      | 27.7  | -19.11   | -40.825%       | 26.467 | -7.543   | -22.179%       | 50.495 | 0.625    | 1.254%         |
| shuffle_order       | 5.0      | 40.81 | -6.0     | -12.818%       | 30.601 | -3.409   | -10.023%       | 49.993 | 0.123    | 0.246%         |
| random_word_delete  | 5.0      | 33.65 | -13.16   | -28.114%       | 24.813 | -9.197   | -27.042%       | 49.548 | -0.322   | -0.646%        |
| swap_syn_word_emb   | 5.0      | 40.05 | -6.76    | -14.441%       | 24.924 | -9.086   | -26.714%       | 49.878 | 0.008    | 0.016%         |
| swap_syn_word_net   | 5.0      | 39.41 | -7.4     | -15.809%       | 24.535 | -9.475   | -27.860%       | 50.366 | 0.496    | 0.995%         |
| back_trans          | 5.0      | 45.95 | -0.86    | -1.837%        | 32.422 | -1.588   | -4.670%        | 49.835 | -0.035   | -0.070%        |
| random_word_swap    | 5.0      | 44.71 | -2.1     | -4.486%        | 32.477 | -1.533   | -4.506%        | 49.706 | -0.164   | -0.329%        |
| nonsense            | 5.0      | 24.93 | -21.88   | -46.742%       | 17.427 | -16.583  | -48.758%       | 49.404 | -0.466   | -0.934%        |

Table 38: Performance and decrease ratio of Single Adapter on CLIP-BART against text corruptions given severity 1 to 4.

| corruption          | severity | VQA   |          |                | GQA    |          |                | NLVR   |          |                |
|---------------------|----------|-------|----------|----------------|--------|----------|----------------|--------|----------|----------------|
|                     |          | Acc   | Decrease | Decrease Ratio | Acc    | Decrease | Decrease Ratio | CIDer  | Decrease | Decrease Ratio |
| ocr                 | 1.0      | 54.73 | -10.62   | -16.251%       | 42.853 | -11.287  | -20.849%       | 59.796 | -14.094  | -19.074%       |
| typos               | 1.0      | 56.85 | -8.5     | -13.007%       | 43.338 | -10.802  | -19.953%       | 71.437 | -2.453   | -3.320%        |
| keyboard            | 1.0      | 55.66 | -9.69    | -14.828%       | 42.36  | -11.78   | -21.759%       | 70.59  | -3.3     | -4.466%        |
| spell_error         | 1.0      | 56.68 | -8.67    | -13.267%       | 43.846 | -10.294  | -19.013%       | 70.245 | -3.645   | -4.932%        |
| random_char_insert  | 1.0      | 51.87 | -13.48   | -20.627%       | 35.602 | -18.538  | -34.241%       | 66.6   | -7.29    | -9.866%        |
| random_char_replace | 1.0      | 48.35 | -17.0    | -26.014%       | 32.97  | -21.17   | -39.102%       | 63.93  | -9.96    | -13.480%       |
| random_char_swap    | 1.0      | 41.63 | -23.72   | -36.297%       | 28.311 | -25.829  | -47.707%       | 59.94  | -13.95   | -18.880%       |
| random_char_delete  | 1.0      | 49.24 | -16.11   | -24.652%       | 34.576 | -19.564  | -36.135%       | 64.963 | -8.927   | -12.081%       |
| random_word_insert  | 1.0      | 65.74 | 0.39     | 0.597%         | 48.362 | -5.778   | -10.672%       | 73.977 | 0.087    | 0.118%         |
| random_word_delete  | 1.0      | 65.62 | 0.27     | 0.413%         | 49.07  | -5.07    | -9.365%        | 72.772 | -1.118   | -1.514%        |
| swap_syn_word_emb   | 1.0      | 55.58 | -9.77    | -14.950%       | 43.171 | -10.969  | -20.261%       | 68.48  | -5.41    | -7.322%        |
| swap_syn_word_net   | 1.0      | 58.29 | -7.06    | -10.803%       | 44.268 | -9.872   | -18.235%       | 71.107 | -2.783   | -3.767%        |
| random_word_swap    | 1.0      | 65.7  | 0.35     | 0.536%         | 49.777 | -4.363   | -8.058%        | 73.087 | -0.803   | -1.086%        |

  

| corruption          | severity | VQA   |          |                | GQA    |          |                | NLVR   |          |                |
|---------------------|----------|-------|----------|----------------|--------|----------|----------------|--------|----------|----------------|
|                     |          | Acc   | Decrease | Decrease Ratio | Acc    | Decrease | Decrease Ratio | CIDer  | Decrease | Decrease Ratio |
| ocr                 | 2.0      | 54.05 | -11.3    | -17.292%       | 39.044 | -15.096  | -27.883%       | 66.557 | -7.333   | -9.925%        |
| typos               | 2.0      | 55.82 | -9.53    | -14.583%       | 40.086 | -14.054  | -25.959%       | 67.547 | -6.343   | -8.584%        |
| keyboard            | 2.0      | 55.16 | -10.19   | -15.593%       | 39.235 | -14.905  | -27.530%       | 66.743 | -7.147   | -9.672%        |
| spell_error         | 2.0      | 55.97 | -9.38    | -14.353%       | 40.491 | -13.649  | -25.210%       | 67.791 | -6.099   | -8.254%        |
| random_char_insert  | 2.0      | 41.58 | -23.77   | -36.373%       | 27.166 | -26.974  | -49.822%       | 60.614 | -13.276  | -17.967%       |
| random_char_replace | 2.0      | 37.16 | -28.19   | -43.137%       | 24.758 | -29.382  | -54.271%       | 57.543 | -16.347  | -22.124%       |
| random_char_swap    | 2.0      | 32.62 | -32.73   | -50.084%       | 21.633 | -32.507  | -60.042%       | 55.103 | -18.787  | -25.426%       |
| random_char_delete  | 2.0      | 39.07 | -26.28   | -40.214%       | 26.499 | -27.641  | -51.055%       | 58.533 | -15.357  | -20.783%       |
| random_word_insert  | 2.0      | 65.05 | -0.3     | -0.459%        | 45.389 | -8.751   | -16.164%       | 73.733 | -0.157   | -0.212%        |
| random_word_delete  | 2.0      | 60.87 | -4.48    | -6.855%        | 44.888 | -9.252   | -17.089%       | 69.901 | -3.989   | -5.399%        |
| swap_syn_word_emb   | 2.0      | 54.71 | -10.64   | -16.282%       | 39.156 | -14.984  | -27.677%       | 64.303 | -9.587   | -12.974%       |
| swap_syn_word_net   | 2.0      | 57.61 | -7.74    | -11.844%       | 42.089 | -12.051  | -22.258%       | 69.011 | -4.879   | -6.603%        |
| random_word_swap    | 2.0      | 65.1  | -0.25    | -0.383%        | 48.299 | -5.841   | -10.789%       | 72.47  | -1.42    | -1.921%        |

  

| corruption          | severity | VQA   |          |                | GQA    |          |                | NLVR   |          |                |
|---------------------|----------|-------|----------|----------------|--------|----------|----------------|--------|----------|----------------|
|                     |          | Acc   | Decrease | Decrease Ratio | Acc    | Decrease | Decrease Ratio | CIDer  | Decrease | Decrease Ratio |
| ocr                 | 3.0      | 49.17 | -16.18   | -24.759%       | 33.598 | -20.542  | -37.942%       | 63.298 | -10.592  | -14.334%       |
| typos               | 3.0      | 51.1  | -14.25   | -21.806%       | 34.592 | -19.548  | -36.106%       | 65.25  | -8.64    | -11.692%       |
| keyboard            | 3.0      | 49.38 | -15.97   | -24.438%       | 32.74  | -21.4    | -39.528%       | 63.614 | -10.276  | -13.907%       |
| spell_error         | 3.0      | 50.93 | -14.42   | -22.066%       | 33.916 | -20.224  | -37.354%       | 63.959 | -9.931   | -13.441%       |
| random_char_insert  | 3.0      | 34.46 | -30.89   | -47.269%       | 23.541 | -30.599  | -56.518%       | 57.83  | -16.06   | -21.735%       |
| random_char_replace | 3.0      | 31.27 | -34.08   | -52.150%       | 21.18  | -32.96   | -60.880%       | 55.835 | -18.055  | -24.435%       |
| random_char_swap    | 3.0      | 28.5  | -36.85   | -56.389%       | 20.099 | -34.041  | -62.877%       | 52.935 | -20.955  | -28.359%       |
| random_char_delete  | 3.0      | 33.39 | -31.96   | -48.906%       | 23.016 | -31.124  | -57.487%       | 56.466 | -17.424  | -23.581%       |
| random_word_insert  | 3.0      | 63.53 | -1.82    | -2.785%        | 42.471 | -11.669  | -21.553%       | 71.997 | -1.893   | -2.563%        |
| random_word_delete  | 3.0      | 58.37 | -6.98    | -10.681%       | 41.104 | -13.036  | -24.079%       | 67.676 | -6.214   | -8.410%        |
| swap_syn_word_emb   | 3.0      | 50.67 | -14.68   | -22.464%       | 34.401 | -19.739  | -36.459%       | 59.954 | -13.936  | -18.860%       |
| swap_syn_word_net   | 3.0      | 54.31 | -11.04   | -16.894%       | 37.979 | -16.161  | -29.850%       | 65.308 | -8.582   | -11.615%       |
| random_word_swap    | 3.0      | 64.55 | -0.8     | -1.224%        | 46.716 | -7.424   | -13.712%       | 72.083 | -1.807   | -2.446%        |

  

| corruption          | severity | VQA   |          |                | GQA    |          |                | NLVR   |          |                |
|---------------------|----------|-------|----------|----------------|--------|----------|----------------|--------|----------|----------------|
|                     |          | Acc   | Decrease | Decrease Ratio | Acc    | Decrease | Decrease Ratio | CIDer  | Decrease | Decrease Ratio |
| ocr                 | 4.0      | 42.41 | -22.94   | -35.103%       | 28.947 | -25.193  | -46.532%       | 58.677 | -15.213  | -20.589%       |
| typos               | 4.0      | 42.13 | -23.22   | -35.532%       | 28.359 | -25.781  | -47.619%       | 60.916 | -12.974  | -17.559%       |
| keyboard            | 4.0      | 39.82 | -25.53   | -39.067%       | 26.045 | -28.095  | -51.892%       | 60.428 | -13.462  | -18.219%       |
| spell_error         | 4.0      | 42.01 | -23.34   | -35.715%       | 27.962 | -26.178  | -48.353%       | 59.911 | -13.979  | -18.919%       |
| random_char_insert  | 4.0      | 30.42 | -34.93   | -53.451%       | 21.1   | -33.04   | -61.026%       | 55.347 | -18.543  | -25.096%       |
| random_char_replace | 4.0      | 27.58 | -37.77   | -57.796%       | 19.272 | -34.868  | -64.404%       | 54.084 | -19.806  | -26.805%       |
| random_char_swap    | 4.0      | 26.37 | -38.98   | -59.648%       | 19.105 | -35.035  | -64.712%       | 52.591 | -21.299  | -28.826%       |
| random_char_delete  | 4.0      | 30.1  | -35.25   | -53.940%       | 21.235 | -32.905  | -60.777%       | 54.371 | -19.519  | -26.417%       |
| random_word_insert  | 4.0      | 61.98 | -3.37    | -5.157%        | 40.173 | -13.967  | -25.797%       | 70.662 | -3.228   | -4.369%        |
| random_word_delete  | 4.0      | 53.05 | -12.3    | -18.822%       | 36.317 | -17.823  | -32.920%       | 66.126 | -7.764   | -10.507%       |
| swap_syn_word_emb   | 4.0      | 47.08 | -18.27   | -27.957%       | 30.689 | -23.451  | -43.316%       | 58.935 | -14.955  | -20.240%       |
| swap_syn_word_net   | 4.0      | 50.6  | -14.75   | -22.571%       | 35.363 | -18.777  | -34.682%       | 61.863 | -12.027  | -16.277%       |
| random_word_swap    | 4.0      | 64.14 | -1.21    | -1.852%        | 46.383 | -7.757   | -14.328%       | 72.097 | -1.793   | -2.427%        |

Table 39: Performance and decrease ratio of Single Adapter on CLIP-BART against text corruptions given severity 5.

| corruption          | severity | VQA   |          |                | GQA    |          |                | NLVR   |          |                |
|---------------------|----------|-------|----------|----------------|--------|----------|----------------|--------|----------|----------------|
|                     |          | Acc   | Decrease | Decrease Ratio | Acc    | Decrease | Decrease Ratio | CIDer  | Decrease | Decrease Ratio |
| ocr                 | 5.0      | 39.25 | -26.1    | -39.939%       | 26.475 | -27.665  | -51.099%       | 56.696 | -17.194  | -23.270%       |
| punctuation         | 5.0      | 65.22 | -0.13    | -0.199%        | 49.658 | -4.482   | -8.278%        | 74.264 | 0.374    | 0.507%         |
| typos               | 5.0      | 29.93 | -35.42   | -54.200%       | 20.671 | -33.469  | -61.819%       | 54.256 | -19.634  | -26.572%       |
| keyboard            | 5.0      | 27.5  | -37.85   | -57.919%       | 19.232 | -34.908  | -64.477%       | 52.849 | -21.041  | -28.476%       |
| spell_error         | 5.0      | 35.31 | -30.04   | -45.968%       | 23.772 | -30.368  | -56.092%       | 55.993 | -17.897  | -24.222%       |
| random_char_insert  | 5.0      | 27.2  | -38.15   | -58.378%       | 19.121 | -35.019  | -64.683%       | 54.055 | -19.835  | -26.844%       |
| random_char_replace | 5.0      | 25.61 | -39.74   | -60.811%       | 18.516 | -35.624  | -65.799%       | 51.931 | -21.959  | -29.719%       |
| random_char_swap    | 5.0      | 25.41 | -39.94   | -61.117%       | 19.351 | -34.789  | -64.257%       | 53.552 | -20.338  | -27.524%       |
| random_char_delete  | 5.0      | 27.41 | -37.94   | -58.057%       | 20.21  | -33.93   | -62.671%       | 52.519 | -21.371  | -28.923%       |
| to_passive          | 5.0      | 61.93 | -3.42    | -5.233%        | 45.357 | -8.783   | -16.223%       | 71.753 | -2.137   | -2.893%        |
| tense               | 5.0      | 64.96 | -0.39    | -0.597%        | 50.151 | -3.989   | -7.368%        | 73.805 | -0.085   | -0.115%        |
| to_formal           | 5.0      | 65.45 | 0.1      | 0.153%         | 49.626 | -4.514   | -8.337%        | 73.346 | -0.544   | -0.737%        |
| to_casual           | 5.0      | 62.54 | -2.81    | -4.300%        | 46.144 | -7.996   | -14.769%       | 72.241 | -1.649   | -2.232%        |
| to_active           | 5.0      | 63.97 | -1.38    | -2.112%        | 48.911 | -5.229   | -9.659%        | 73.518 | -0.372   | -0.503%        |
| double_denial       | 5.0      | 65.67 | 0.32     | 0.490%         | 50.421 | -3.719   | -6.869%        | 73.862 | -0.028   | -0.037%        |
| insert_adv          | 5.0      | 62.13 | -3.22    | -4.927%        | 46.987 | -7.153   | -13.212%       | 72.212 | -1.678   | -2.271%        |
| append_irr          | 5.0      | 60.64 | -4.71    | -7.207%        | 44.212 | -9.928   | -18.337%       | 67.346 | -6.544   | -8.856%        |
| random_word_insert  | 5.0      | 57.72 | -7.63    | -11.676%       | 36.111 | -18.029  | -33.301%       | 69.671 | -4.219   | -5.709%        |
| drop_nn             | 5.0      | 47.26 | -18.09   | -27.682%       | 33.185 | -20.955  | -38.705%       | 64.188 | -9.702   | -13.130%       |
| drop_rand_one_nn    | 5.0      | 58.25 | -7.1     | -10.865%       | 43.576 | -10.564  | -19.512%       | 72.398 | -1.492   | -2.019%        |
| drop_vb             | 5.0      | 60.07 | -5.28    | -8.800%        | 42.487 | -11.653  | -21.524%       | 71.796 | -2.094   | -2.834%        |
| drop_vb_nn          | 5.0      | 47.72 | -17.63   | -26.978%       | 32.088 | -22.052  | -40.732%       | 61.777 | -12.113  | -16.393%       |
| only_nn             | 5.0      | 38.19 | -27.16   | -41.561%       | 25.561 | -28.579  | -52.788%       | 55.289 | -18.601  | -25.174%       |
| only_vb             | 5.0      | 53.34 | -12.01   | -18.378%       | 37.725 | -16.415  | -30.320%       | 67.03  | -6.86    | -9.284%        |
| only_vb_nn          | 5.0      | 43.62 | -21.73   | -33.252%       | 28.582 | -25.558  | -47.208%       | 58.461 | -15.429  | -20.881%       |
| drop_rand_one_vb    | 5.0      | 64.17 | -1.18    | -1.806%        | 47.241 | -6.899   | -12.742%       | 73.13  | -0.76    | -1.028%        |
| drop_first          | 5.0      | 61.73 | -3.62    | -5.539%        | 44.069 | -10.071  | -18.602%       | 73.13  | -0.76    | -1.028%        |
| drop_last           | 5.0      | 55.02 | -10.33   | -15.807%       | 43.346 | -10.794  | -19.938%       | 70.949 | -2.941   | -3.981%        |
| drop_first_and_last | 5.0      | 49.3  | -16.05   | -24.560%       | 37.176 | -16.964  | -31.334%       | 69.399 | -4.491   | -6.079%        |
| shuffle_order       | 5.0      | 62.05 | -3.3     | -5.050%        | 40.865 | -13.275  | -24.520%       | 69.485 | -4.405   | -5.962%        |
| random_word_delete  | 5.0      | 47.16 | -18.19   | -27.835%       | 31.905 | -22.235  | -41.070%       | 63.93  | -9.96    | -13.480%       |
| swap_syn_word_emb   | 5.0      | 46.35 | -19.0    | -29.074%       | 29.806 | -24.334  | -44.946%       | 58.375 | -15.515  | -20.997%       |
| swap_syn_word_net   | 5.0      | 47.7  | -17.65   | -27.008%       | 34.449 | -19.691  | -36.370%       | 60.055 | -13.835  | -18.724%       |
| back_trans          | 5.0      | 62.29 | -3.06    | -4.682%        | 46.629 | -7.511   | -13.873%       | 73.087 | -0.803   | -1.086%        |
| random_word_swap    | 5.0      | 63.78 | -1.57    | -2.402%        | 44.896 | -9.244   | -17.075%       | 72.183 | -1.707   | -2.310%        |
| nonsense            | 5.0      | 0.09  | -65.26   | -99.862%       | 0.0    | -54.14   | -100.000%      | 51.342 | -22.548  | -30.516%       |

Table 40: Performance and decrease ratio of Single Compacter on CLIP-BART against text corruptions given severity 1 to 4.

| corruption          | severity | VQA   |          |                | GQA    |          |                | NLVR   |          |                |
|---------------------|----------|-------|----------|----------------|--------|----------|----------------|--------|----------|----------------|
|                     |          | Acc   | Decrease | Decrease Ratio | Acc    | Decrease | Decrease Ratio | CIDer  | Decrease | Decrease Ratio |
| ocr                 | 1.0      | 54.28 | -10.19   | -15.806%       | 41.779 | -11.121  | -21.022%       | 56.122 | -13.818  | -19.757%       |
| typos               | 1.0      | 56.27 | -8.2     | -12.719%       | 43.171 | -9.729   | -18.392%       | 68.236 | -1.704   | -2.436%        |
| keyboard            | 1.0      | 55.05 | -9.42    | -14.611%       | 42.145 | -10.755  | -20.331%       | 67.447 | -2.493   | -3.565%        |
| spell_error         | 1.0      | 55.9  | -8.57    | -13.293%       | 42.892 | -10.008  | -18.918%       | 67.92  | -2.02    | -2.888%        |
| random_char_insert  | 1.0      | 51.37 | -13.1    | -20.320%       | 35.427 | -17.473  | -33.030%       | 64.633 | -5.307   | -7.588%        |
| random_char_replace | 1.0      | 47.83 | -16.64   | -25.810%       | 33.002 | -19.898  | -37.614%       | 62.222 | -7.718   | -11.035%       |
| random_char_swap    | 1.0      | 41.69 | -22.78   | -35.334%       | 27.962 | -24.938  | -47.143%       | 57.815 | -12.125  | -17.336%       |
| random_char_delete  | 1.0      | 49.17 | -15.3    | -23.732%       | 34.743 | -18.157  | -34.323%       | 62.452 | -7.488   | -10.707%       |
| random_word_insert  | 1.0      | 64.38 | -0.09    | -0.140%        | 48.322 | -4.578   | -8.653%        | 70.418 | 0.478    | 0.683%         |
| random_word_delete  | 1.0      | 64.36 | -0.11    | -0.171%        | 48.593 | -4.307   | -8.142%        | 69.427 | -0.513   | -0.733%        |
| swap_syn_word_emb   | 1.0      | 54.63 | -9.84    | -15.263%       | 42.741 | -10.159  | -19.204%       | 65.767 | -4.173   | -5.966%        |
| swap_syn_word_net   | 1.0      | 56.92 | -7.55    | -11.711%       | 43.918 | -8.982   | -16.979%       | 67.662 | -2.278   | -3.257%        |
| random_word_swap    | 1.0      | 64.34 | -0.13    | -0.202%        | 49.014 | -3.886   | -7.346%        | 69.686 | -0.254   | -0.364%        |

  

| corruption          | severity | VQA   |          |                | GQA    |          |                | NLVR   |          |                |
|---------------------|----------|-------|----------|----------------|--------|----------|----------------|--------|----------|----------------|
|                     |          | Acc   | Decrease | Decrease Ratio | Acc    | Decrease | Decrease Ratio | CIDer  | Decrease | Decrease Ratio |
| ocr                 | 2.0      | 53.82 | -10.65   | -16.519%       | 39.251 | -13.649  | -25.801%       | 63.657 | -6.283   | -8.983%        |
| typos               | 2.0      | 55.05 | -9.42    | -14.611%       | 40.142 | -12.758  | -24.118%       | 64.92  | -5.02    | -7.177%        |
| keyboard            | 2.0      | 54.56 | -9.91    | -15.371%       | 38.893 | -14.007  | -26.478%       | 64.992 | -4.948   | -7.074%        |
| spell_error         | 2.0      | 55.03 | -9.44    | -14.642%       | 40.626 | -12.274  | -23.201%       | 64.432 | -5.508   | -7.875%        |
| random_char_insert  | 2.0      | 41.58 | -22.89   | -35.505%       | 27.238 | -25.662  | -48.510%       | 59.567 | -10.373  | -14.832%       |
| random_char_replace | 2.0      | 36.69 | -27.78   | -43.090%       | 24.058 | -28.842  | -54.522%       | 56.897 | -13.043  | -18.649%       |
| random_char_swap    | 2.0      | 32.41 | -32.06   | -49.729%       | 22.229 | -30.671  | -57.979%       | 54.93  | -15.01   | -21.461%       |
| random_char_delete  | 2.0      | 38.9  | -25.57   | -39.662%       | 26.697 | -26.203  | -49.532%       | 57.126 | -12.814  | -18.321%       |
| random_word_insert  | 2.0      | 63.54 | -0.93    | -1.443%        | 45.516 | -7.384   | -13.958%       | 70.332 | 0.392    | 0.560%         |
| random_word_delete  | 2.0      | 59.56 | -4.91    | -7.616%        | 43.711 | -9.189   | -17.370%       | 67.82  | -2.12    | -3.032%        |
| swap_syn_word_emb   | 2.0      | 53.58 | -10.89   | -16.892%       | 39.513 | -13.387  | -25.305%       | 61.49  | -8.45    | -12.082%       |
| swap_syn_word_net   | 2.0      | 56.45 | -8.02    | -12.440%       | 41.803 | -11.097  | -20.977%       | 65.207 | -4.733   | -6.767%        |
| random_word_swap    | 2.0      | 63.41 | -1.06    | -1.644%        | 47.201 | -5.699   | -10.772%       | 69.04  | -0.9     | -1.287%        |

  

| corruption          | severity | VQA   |          |                | GQA    |          |                | NLVR   |          |                |
|---------------------|----------|-------|----------|----------------|--------|----------|----------------|--------|----------|----------------|
|                     |          | Acc   | Decrease | Decrease Ratio | Acc    | Decrease | Decrease Ratio | CIDer  | Decrease | Decrease Ratio |
| ocr                 | 3.0      | 49.39 | -15.08   | -23.391%       | 33.455 | -19.445  | -36.758%       | 59.739 | -10.201  | -14.586%       |
| typos               | 3.0      | 50.46 | -14.01   | -21.731%       | 34.576 | -18.324  | -34.638%       | 62.81  | -7.13    | -10.194%       |
| keyboard            | 3.0      | 49.29 | -15.18   | -23.546%       | 32.724 | -20.176  | -38.140%       | 62.078 | -7.862   | -11.241%       |
| spell_error         | 3.0      | 50.28 | -14.19   | -22.010%       | 34.195 | -18.705  | -35.360%       | 61.849 | -8.091   | -11.569%       |
| random_char_insert  | 3.0      | 34.67 | -29.8    | -46.223%       | 23.263 | -29.637  | -56.025%       | 56.524 | -13.416  | -19.183%       |
| random_char_replace | 3.0      | 30.24 | -34.23   | -53.094%       | 20.687 | -32.213  | -60.894%       | 54.83  | -15.11   | -21.604%       |
| random_char_swap    | 3.0      | 28.78 | -35.69   | -55.359%       | 20.329 | -32.571  | -61.571%       | 52.232 | -17.708  | -25.319%       |
| random_char_delete  | 3.0      | 33.24 | -31.23   | -48.441%       | 23.318 | -29.582  | -55.920%       | 54.414 | -15.526  | -22.200%       |
| random_word_insert  | 3.0      | 62.35 | -2.12    | -3.288%        | 42.407 | -10.493  | -19.835%       | 69.255 | -0.685   | -0.979%        |
| random_word_delete  | 3.0      | 57.35 | -7.12    | -11.044%       | 40.817 | -12.083  | -22.841%       | 65.494 | -4.446   | -6.356%        |
| swap_syn_word_emb   | 3.0      | 50.21 | -14.26   | -22.119%       | 34.179 | -18.721  | -35.390%       | 59.265 | -10.675  | -15.263%       |
| swap_syn_word_net   | 3.0      | 53.02 | -11.45   | -17.760%       | 38.297 | -14.603  | -27.605%       | 62.193 | -7.747   | -11.076%       |
| random_word_swap    | 3.0      | 62.96 | -1.51    | -2.342%        | 46.224 | -6.676   | -12.621%       | 69.255 | -0.685   | -0.979%        |

  

| corruption          | severity | VQA   |          |                | GQA    |          |                | NLVR   |          |                |
|---------------------|----------|-------|----------|----------------|--------|----------|----------------|--------|----------|----------------|
|                     |          | Acc   | Decrease | Decrease Ratio | Acc    | Decrease | Decrease Ratio | CIDer  | Decrease | Decrease Ratio |
| ocr                 | 4.0      | 42.76 | -21.71   | -33.675%       | 29.067 | -23.833  | -45.054%       | 56.28  | -13.66   | -19.532%       |
| typos               | 4.0      | 42.49 | -21.98   | -34.093%       | 28.033 | -24.867  | -47.007%       | 58.677 | -11.263  | -16.104%       |
| spell_error         | 4.0      | 42.41 | -22.06   | -34.217%       | 28.073 | -24.827  | -46.932%       | 58.16  | -11.78   | -16.843%       |
| random_char_insert  | 4.0      | 30.63 | -33.84   | -52.490%       | 20.719 | -32.181  | -60.834%       | 54.988 | -14.952  | -21.379%       |
| random_char_replace | 4.0      | 26.52 | -37.95   | -58.865%       | 18.079 | -34.821  | -65.824%       | 52.978 | -16.962  | -24.252%       |
| random_char_swap    | 4.0      | 26.33 | -38.14   | -59.159%       | 19.288 | -33.612  | -63.539%       | 53.194 | -16.746  | -23.944%       |
| random_char_delete  | 4.0      | 29.97 | -34.5    | -53.513%       | 20.981 | -31.919  | -60.338%       | 53.323 | -16.617  | -23.759%       |
| random_word_insert  | 4.0      | 60.56 | -3.91    | -6.065%        | 40.237 | -12.663  | -23.938%       | 68.365 | -1.575   | -2.252%        |
| random_word_delete  | 4.0      | 51.55 | -12.92   | -20.040%       | 35.077 | -17.823  | -33.692%       | 63.428 | -6.512   | -9.311%        |
| swap_syn_word_emb   | 4.0      | 46.5  | -17.97   | -27.873%       | 31.356 | -21.544  | -40.725%       | 58.102 | -11.838  | -16.925%       |
| swap_syn_word_net   | 4.0      | 49.65 | -14.82   | -22.987%       | 35.952 | -16.948  | -32.038%       | 59.251 | -10.689  | -15.283%       |
| random_word_swap    | 4.0      | 62.62 | -1.85    | -2.870%        | 45.277 | -7.623   | -14.409%       | 68.164 | -1.776   | -2.539%        |
| random_word_swap    | 3.0      | 62.96 | -1.51    | -2.342%        | 46.224 | -6.676   | -12.621%       | 69.255 | -0.685   | -0.979%        |



Table 41: Performance and decrease ratio of Single Compacter on CLIP-BART against text corruptions given severity 5.

| corruption          | severity | VQA   |          |                | GQA    |          |                | NLVR   |          |                |
|---------------------|----------|-------|----------|----------------|--------|----------|----------------|--------|----------|----------------|
|                     |          | Acc   | Decrease | Decrease Ratio | Acc    | Decrease | Decrease Ratio | CIDer  | Decrease | Decrease Ratio |
| ocr                 | 5.0      | 40.14 | -24.33   | -37.738%       | 26.475 | -26.425  | -49.953%       | 54.988 | -14.952  | -21.379%       |
| punctuation         | 5.0      | 64.18 | -0.29    | -0.450%        | 48.768 | -4.132   | -7.812%        | 69.858 | -0.082   | -0.117%        |
| typos               | 5.0      | 30.66 | -33.81   | -52.443%       | 20.83  | -32.07   | -60.624%       | 52.146 | -17.794  | -25.442%       |
| keyboard            | 5.0      | 27.91 | -36.56   | -56.709%       | 18.922 | -33.978  | -64.231%       | 51.931 | -18.009  | -25.750%       |
| spell_error         | 5.0      | 36.05 | -28.42   | -44.083%       | 24.09  | -28.81   | -54.462%       | 55.461 | -14.479  | -20.701%       |
| random_char_insert  | 5.0      | 27.56 | -36.91   | -57.251%       | 19.447 | -33.453  | -63.239%       | 53.825 | -16.115  | -23.041%       |
| random_char_replace | 5.0      | 24.0  | -40.47   | -62.773%       | 16.529 | -36.371  | -68.755%       | 52.246 | -17.694  | -25.298%       |
| random_char_swap    | 5.0      | 25.68 | -38.79   | -60.168%       | 20.122 | -32.778  | -61.961%       | 52.863 | -17.077  | -24.416%       |
| random_char_delete  | 5.0      | 27.65 | -36.82   | -57.112%       | 19.86  | -33.04   | -62.457%       | 52.347 | -17.593  | -25.155%       |
| to_passive          | 5.0      | 59.84 | -4.63    | -7.182%        | 44.761 | -8.139   | -15.386%       | 68.638 | -1.302   | -1.862%        |
| tense               | 5.0      | 63.67 | -0.8     | -1.241%        | 49.459 | -3.441   | -6.504%        | 70.159 | 0.219    | 0.314%         |
| to_formal           | 5.0      | 63.94 | -0.53    | -0.822%        | 48.879 | -4.021   | -7.601%        | 69.973 | 0.033    | 0.047%         |
| to_casual           | 5.0      | 60.54 | -3.93    | -6.096%        | 45.572 | -7.328   | -13.853%       | 68.652 | -1.288   | -1.841%        |
| to_active           | 5.0      | 62.53 | -1.94    | -3.009%        | 47.798 | -5.102   | -9.645%        | 69.528 | -0.412   | -0.589%        |
| double_denial       | 5.0      | 64.43 | -0.04    | -0.062%        | 49.754 | -3.146   | -5.948%        | 69.944 | 0.004    | 0.006%         |
| insert_adv          | 5.0      | 60.74 | -3.73    | -5.786%        | 45.588 | -7.312   | -13.823%       | 68.997 | -0.943   | -1.349%        |
| append_irr          | 5.0      | 59.21 | -5.26    | -8.159%        | 43.171 | -9.729   | -18.392%       | 63.715 | -6.225   | -8.901%        |
| random_word_insert  | 5.0      | 56.42 | -8.05    | -12.486%       | 36.484 | -16.416  | -31.031%       | 67.906 | -2.034   | -2.908%        |
| drop_nn             | 5.0      | 47.12 | -17.35   | -26.912%       | 32.732 | -20.168  | -38.125%       | 63.815 | -6.125   | -8.757%        |
| drop_rand_one_nn    | 5.0      | 57.7  | -6.77    | -10.501%       | 43.568 | -9.332   | -17.641%       | 69.241 | -0.699   | -1.000%        |
| drop_vb             | 5.0      | 58.63 | -5.84    | -9.058%        | 42.447 | -10.453  | -19.760%       | 68.724 | -1.216   | -1.739%        |
| drop_vb_nn          | 5.0      | 46.33 | -18.14   | -28.137%       | 30.72  | -22.18   | -41.928%       | 61.045 | -8.895   | -12.718%       |
| only_nn             | 5.0      | 37.29 | -27.18   | -42.159%       | 23.072 | -29.828  | -56.386%       | 53.567 | -16.373  | -23.410%       |
| only_vb             | 5.0      | 51.79 | -12.68   | -19.668%       | 36.19  | -16.71   | -31.588%       | 63.873 | -6.067   | -8.675%        |
| only_vb_nn          | 5.0      | 41.8  | -22.67   | -35.164%       | 25.783 | -27.117  | -51.261%       | 56.581 | -13.359  | -19.101%       |
| drop_rand_one_vb    | 5.0      | 62.38 | -2.09    | -3.242%        | 46.812 | -6.088   | -11.509%       | 69.614 | -0.326   | -0.466%        |
| drop_first          | 5.0      | 59.78 | -4.69    | -7.275%        | 43.075 | -9.825   | -18.572%       | 69.772 | -0.168   | -0.241%        |
| drop_last           | 5.0      | 54.38 | -10.09   | -15.651%       | 43.306 | -9.594   | -18.137%       | 67.891 | -2.049   | -2.929%        |
| drop_first_and_last | 5.0      | 47.38 | -17.09   | -26.508%       | 37.224 | -15.676  | -29.634%       | 66.987 | -2.953   | -4.222%        |
| shuffle_order       | 5.0      | 59.98 | -4.49    | -6.964%        | 39.378 | -13.522  | -25.561%       | 66.14  | -3.8     | -5.433%        |
| random_word_delete  | 5.0      | 46.11 | -18.36   | -28.478%       | 31.332 | -21.568  | -40.770%       | 62.696 | -7.244   | -10.358%       |
| swap_syn_word_emb   | 5.0      | 45.82 | -18.65   | -28.928%       | 30.529 | -22.371  | -42.288%       | 57.844 | -12.096  | -17.295%       |
| swap_syn_word_net   | 5.0      | 46.94 | -17.53   | -27.191%       | 34.433 | -18.467  | -34.909%       | 57.643 | -12.297  | -17.582%       |
| back_trans          | 5.0      | 60.83 | -3.64    | -5.646%        | 46.224 | -6.676   | -12.621%       | 68.925 | -1.015   | -1.451%        |
| random_word_swap    | 5.0      | 61.84 | -2.63    | -4.079%        | 43.878 | -9.022   | -17.054%       | 68.078 | -1.862   | -2.662%        |
| nonsense            | 5.0      | 1.04  | -63.43   | -98.387%       | 0.922  | -51.978  | -98.257%       | 51.127 | -18.813  | -26.899%       |

Table 42: Performance and decrease ratio of Single LoRA on CLIP-BART against text corruptions given severity 1 to 4.

| corruption          | severity | VQA   |          |                | GQA    |          |                | NLVR   |          |                |
|---------------------|----------|-------|----------|----------------|--------|----------|----------------|--------|----------|----------------|
|                     |          | Acc   | Decrease | Decrease Ratio | Acc    | Decrease | Decrease Ratio | CIDer  | Decrease | Decrease Ratio |
| ocr                 | 1.0      | 54.03 | -11.31   | -17.309%       | 41.294 | -11.896  | -22.364%       | 57.586 | -15.994  | -21.737%       |
| typos               | 1.0      | 55.93 | -9.41    | -14.402%       | 42.36  | -10.83   | -20.362%       | 71.064 | -2.516   | -3.420%        |
| keyboard            | 1.0      | 54.74 | -10.6    | -16.223%       | 41.278 | -11.912  | -22.394%       | 69.815 | -3.765   | -5.117%        |
| spell_error         | 1.0      | 55.81 | -9.53    | -14.585%       | 42.956 | -10.234  | -19.241%       | 69.04  | -4.54    | -6.170%        |
| random_char_insert  | 1.0      | 50.69 | -14.65   | -22.421%       | 34.457 | -18.733  | -35.219%       | 65.064 | -8.516   | -11.574%       |
| random_char_replace | 1.0      | 47.61 | -17.73   | -27.135%       | 31.754 | -21.436  | -40.301%       | 62.724 | -10.856  | -14.754%       |
| random_char_swap    | 1.0      | 41.04 | -24.3    | -37.190%       | 27.413 | -25.777  | -48.462%       | 59.523 | -14.057  | -19.104%       |
| random_char_delete  | 1.0      | 49.16 | -16.18   | -24.763%       | 33.877 | -19.313  | -36.310%       | 63.499 | -10.081  | -13.700%       |
| random_word_insert  | 1.0      | 65.29 | -0.05    | -0.077%        | 47.09  | -6.1     | -11.468%       | 72.714 | -0.866   | -1.177%        |
| random_word_delete  | 1.0      | 65.24 | -0.1     | -0.153%        | 48.243 | -4.947   | -9.301%        | 72.427 | -1.153   | -1.567%        |
| swap_syn_word_emb   | 1.0      | 55.15 | -10.19   | -15.595%       | 42.407 | -10.783  | -20.272%       | 67.762 | -5.818   | -7.907%        |
| swap_syn_word_net   | 1.0      | 57.75 | -7.59    | -11.616%       | 43.584 | -9.606   | -18.060%       | 71.336 | -2.244   | -3.049%        |
| random_word_swap    | 1.0      | 65.29 | -0.05    | -0.077%        | 48.68  | -4.51    | -8.479%        | 73.331 | -0.249   | -0.338%        |

  

| corruption          | severity | VQA   |          |                | GQA    |          |                | NLVR   |          |                |
|---------------------|----------|-------|----------|----------------|--------|----------|----------------|--------|----------|----------------|
|                     |          | Acc   | Decrease | Decrease Ratio | Acc    | Decrease | Decrease Ratio | CIDer  | Decrease | Decrease Ratio |
| ocr                 | 2.0      | 53.46 | -11.88   | -18.182%       | 38.305 | -14.885  | -27.985%       | 65.609 | -7.971   | -10.833%       |
| typos               | 2.0      | 55.05 | -10.29   | -15.748%       | 39.935 | -13.255  | -24.920%       | 66.758 | -6.822   | -9.272%        |
| keyboard            | 2.0      | 54.0  | -11.34   | -17.355%       | 38.098 | -15.092  | -28.373%       | 66.815 | -6.765   | -9.194%        |
| spell_error         | 2.0      | 55.24 | -10.1    | -15.458%       | 39.394 | -13.796  | -25.937%       | 66.499 | -7.081   | -9.623%        |
| random_char_insert  | 2.0      | 40.12 | -25.22   | -38.598%       | 25.441 | -27.749  | -52.169%       | 59.236 | -14.344  | -19.494%       |
| random_char_replace | 2.0      | 35.78 | -29.56   | -45.240%       | 23.159 | -30.031  | -56.459%       | 57.414 | -16.166  | -21.971%       |
| random_char_swap    | 2.0      | 32.25 | -33.09   | -50.643%       | 20.981 | -32.209  | -60.554%       | 54.701 | -18.879  | -25.658%       |
| random_char_delete  | 2.0      | 38.83 | -26.51   | -40.572%       | 26.713 | -26.477  | -49.778%       | 57.83  | -15.75   | -21.406%       |
| random_word_insert  | 2.0      | 63.88 | -1.46    | -2.234%        | 42.956 | -10.234  | -19.241%       | 71.509 | -2.071   | -2.815%        |
| random_word_delete  | 2.0      | 59.92 | -5.42    | -8.295%        | 43.409 | -9.781   | -18.389%       | 69.399 | -4.181   | -5.683%        |
| swap_syn_word_emb   | 2.0      | 54.19 | -11.15   | -17.065%       | 39.021 | -14.169  | -26.639%       | 62.452 | -11.128  | -15.124%       |
| swap_syn_word_net   | 2.0      | 56.9  | -8.44    | -12.917%       | 41.342 | -11.848  | -22.275%       | 67.963 | -5.617   | -7.634%        |
| random_word_swap    | 2.0      | 64.48 | -0.86    | -1.316%        | 47.027 | -6.163   | -11.588%       | 72.312 | -1.268   | -1.723%        |

  

| corruption          | severity | VQA   |          |                | GQA    |          |                | NLVR   |          |                |
|---------------------|----------|-------|----------|----------------|--------|----------|----------------|--------|----------|----------------|
|                     |          | Acc   | Decrease | Decrease Ratio | Acc    | Decrease | Decrease Ratio | CIDer  | Decrease | Decrease Ratio |
| ocr                 | 3.0      | 48.98 | -16.36   | -25.038%       | 31.643 | -21.547  | -40.510%       | 61.002 | -12.578  | -17.095%       |
| typos               | 3.0      | 50.0  | -15.34   | -23.477%       | 33.082 | -20.108  | -37.805%       | 64.117 | -9.463   | -12.861%       |
| keyboard            | 3.0      | 48.27 | -17.07   | -26.125%       | 31.643 | -21.547  | -40.510%       | 62.954 | -10.626  | -14.442%       |
| spell_error         | 3.0      | 50.1  | -15.24   | -23.324%       | 33.018 | -20.172  | -37.924%       | 63.413 | -10.167  | -13.817%       |
| random_char_insert  | 3.0      | 32.75 | -32.59   | -49.878%       | 21.697 | -31.493  | -59.209%       | 56.323 | -17.257  | -23.454%       |
| random_char_replace | 3.0      | 29.42 | -35.92   | -54.974%       | 19.343 | -33.847  | -63.634%       | 54.93  | -18.65   | -25.346%       |
| random_char_swap    | 3.0      | 28.46 | -36.88   | -56.443%       | 19.407 | -33.783  | -63.514%       | 52.304 | -21.276  | -28.916%       |
| random_char_delete  | 3.0      | 33.02 | -32.32   | -49.464%       | 22.452 | -30.738  | -57.789%       | 54.672 | -18.908  | -25.697%       |
| random_word_insert  | 3.0      | 61.85 | -3.49    | -5.341%        | 39.521 | -13.669  | -25.698%       | 69.915 | -3.665   | -4.981%        |
| random_word_delete  | 3.0      | 57.35 | -7.99    | -12.228%       | 39.696 | -13.494  | -25.369%       | 67.332 | -6.248   | -8.492%        |
| swap_syn_word_emb   | 3.0      | 50.31 | -15.03   | -23.003%       | 33.408 | -19.782  | -37.192%       | 59.724 | -13.856  | -18.831%       |
| swap_syn_word_net   | 3.0      | 53.93 | -11.41   | -17.463%       | 37.534 | -15.656  | -29.435%       | 64.791 | -8.789   | -11.945%       |
| random_word_swap    | 3.0      | 63.77 | -1.57    | -2.403%        | 45.866 | -7.324   | -13.770%       | 71.953 | -1.627   | -2.211%        |

  

| corruption          | severity | VQA   |          |                | GQA    |          |                | NLVR   |          |                |
|---------------------|----------|-------|----------|----------------|--------|----------|----------------|--------|----------|----------------|
|                     |          | Acc   | Decrease | Decrease Ratio | Acc    | Decrease | Decrease Ratio | CIDer  | Decrease | Decrease Ratio |
| ocr                 | 4.0      | 42.16 | -23.18   | -35.476%       | 27.238 | -25.952  | -48.791%       | 57.528 | -16.052  | -21.815%       |
| typos               | 4.0      | 41.83 | -23.51   | -35.981%       | 27.103 | -26.087  | -49.045%       | 60.212 | -13.368  | -18.167%       |
| keyboard            | 4.0      | 39.16 | -26.18   | -40.067%       | 25.052 | -28.138  | -52.902%       | 59.782 | -13.798  | -18.753%       |
| spell_error         | 4.0      | 41.9  | -23.44   | -35.874%       | 27.866 | -25.324  | -47.610%       | 58.949 | -14.631  | -19.884%       |
| random_char_insert  | 4.0      | 28.5  | -36.84   | -56.382%       | 18.914 | -34.276  | -64.441%       | 54.112 | -19.468  | -26.458%       |
| random_char_replace | 4.0      | 25.34 | -40.0    | -61.218%       | 16.394 | -36.796  | -69.179%       | 53.495 | -20.085  | -27.297%       |
| random_char_swap    | 4.0      | 25.75 | -39.59   | -60.591%       | 18.318 | -34.872  | -65.562%       | 53.021 | -20.559  | -27.940%       |
| random_char_delete  | 4.0      | 29.86 | -35.48   | -54.301%       | 20.091 | -33.099  | -62.229%       | 53.596 | -19.984  | -27.160%       |
| random_word_insert  | 4.0      | 59.19 | -6.15    | -9.412%        | 36.421 | -16.769  | -31.527%       | 69.097 | -4.483   | -6.092%        |
| random_word_delete  | 4.0      | 51.52 | -13.82   | -21.151%       | 34.568 | -18.622  | -35.010%       | 65.581 | -7.999   | -10.872%       |
| swap_syn_word_emb   | 4.0      | 46.82 | -18.52   | -28.344%       | 30.275 | -22.915  | -43.081%       | 58.346 | -15.234  | -20.703%       |
| swap_syn_word_net   | 4.0      | 50.73 | -14.61   | -22.360%       | 35.244 | -17.946  | -33.739%       | 60.988 | -12.592  | -17.114%       |
| random_word_swap    | 4.0      | 63.14 | -2.2     | -3.367%        | 44.983 | -8.207   | -15.429%       | 71.523 | -2.057   | -2.796%        |

Table 43: Performance and decrease ratio of Single LoRA on CLIP-BART against text corruptions given severity 5.

| corruption          | severity | VQA   |          |                | GQA    |          |                | NLVR   |          |                |
|---------------------|----------|-------|----------|----------------|--------|----------|----------------|--------|----------|----------------|
|                     |          | Acc   | Decrease | Decrease Ratio | Acc    | Decrease | Decrease Ratio | CIDer  | Decrease | Decrease Ratio |
| ocr                 | 5.0      | 38.86 | -26.48   | -40.526%       | 24.837 | -28.353  | -53.305%       | 55.519 | -18.061  | -24.546%       |
| punctuation         | 5.0      | 64.49 | -0.85    | -1.301%        | 48.37  | -4.82    | -9.062%        | 72.987 | -0.593   | -0.806%        |
| typos               | 5.0      | 29.97 | -35.37   | -54.132%       | 20.902 | -32.288  | -60.704%       | 52.519 | -21.061  | -28.623%       |
| keyboard            | 5.0      | 27.27 | -38.07   | -58.264%       | 18.691 | -34.499  | -64.859%       | 51.17  | -22.41   | -30.457%       |
| spell_error         | 5.0      | 35.33 | -30.01   | -45.929%       | 23.43  | -29.76   | -55.951%       | 55.375 | -18.205  | -24.741%       |
| random_char_insert  | 5.0      | 25.29 | -40.05   | -61.295%       | 17.244 | -35.946  | -67.580%       | 53.194 | -20.386  | -27.706%       |
| random_char_replace | 5.0      | 21.98 | -43.36   | -66.361%       | 14.676 | -38.514  | -72.408%       | 51.399 | -22.181  | -30.145%       |
| random_char_swap    | 5.0      | 25.14 | -40.2    | -61.524%       | 18.946 | -34.244  | -64.381%       | 52.088 | -21.492  | -29.208%       |
| random_char_delete  | 5.0      | 27.67 | -37.67   | -57.652%       | 19.391 | -33.799  | -63.544%       | 51.916 | -21.664  | -29.443%       |
| to_passive          | 5.0      | 62.35 | -2.99    | -4.576%        | 44.896 | -8.294   | -15.593%       | 71.537 | -2.043   | -2.776%        |
| tense               | 5.0      | 64.42 | -0.92    | -1.408%        | 48.823 | -4.367   | -8.210%        | 73.26  | -0.32    | -0.435%        |
| to_formal           | 5.0      | 64.85 | -0.49    | -0.750%        | 48.37  | -4.82    | -9.062%        | 73.331 | -0.249   | -0.338%        |
| to_casual           | 5.0      | 61.93 | -3.41    | -5.219%        | 45.365 | -7.825   | -14.712%       | 71.882 | -1.698   | -2.308%        |
| to_active           | 5.0      | 63.44 | -1.9     | -2.908%        | 47.519 | -5.671   | -10.661%       | 72.7   | -0.88    | -1.196%        |
| double_denial       | 5.0      | 65.29 | -0.05    | -0.077%        | 49.229 | -3.961   | -7.447%        | 73.59  | 0.01     | 0.013%         |
| insert_adv          | 5.0      | 60.31 | -5.03    | -7.698%        | 44.928 | -8.262   | -15.534%       | 71.178 | -2.402   | -3.264%        |
| append_irr          | 5.0      | 56.4  | -8.94    | -13.682%       | 40.475 | -12.715  | -23.904%       | 66.054 | -7.526   | -10.228%       |
| random_word_insert  | 5.0      | 53.97 | -11.37   | -17.401%       | 32.04  | -21.15   | -39.763%       | 67.203 | -6.377   | -8.667%        |
| drop_nn             | 5.0      | 45.29 | -20.05   | -30.686%       | 30.068 | -23.122  | -43.470%       | 63.629 | -9.951   | -13.525%       |
| drop_rand_one_nn    | 5.0      | 57.52 | -7.82    | -11.968%       | 41.859 | -11.331  | -21.303%       | 71.81  | -1.77    | -2.406%        |
| drop_vb             | 5.0      | 56.85 | -8.49    | -12.994%       | 37.407 | -15.783  | -29.674%       | 70.188 | -3.392   | -4.610%        |
| drop_vb_nn          | 5.0      | 42.7  | -22.64   | -34.650%       | 26.435 | -26.755  | -50.301%       | 60.456 | -13.124  | -17.836%       |
| only_nn             | 5.0      | 30.67 | -34.67   | -53.061%       | 17.324 | -35.866  | -67.430%       | 54.873 | -18.707  | -25.424%       |
| only_vb             | 5.0      | 50.27 | -15.07   | -23.064%       | 35.332 | -17.858  | -33.575%       | 67.346 | -6.234   | -8.472%        |
| only_vb_nn          | 5.0      | 36.27 | -29.07   | -44.490%       | 20.512 | -32.678  | -61.436%       | 57.414 | -16.166  | -21.971%       |
| drop_rand_one_vb    | 5.0      | 62.12 | -3.22    | -4.928%        | 44.339 | -8.851   | -16.640%       | 72.183 | -1.397   | -1.898%        |
| drop_first          | 5.0      | 53.88 | -11.46   | -17.539%       | 35.936 | -17.254  | -32.439%       | 72.154 | -1.426   | -1.937%        |
| drop_last           | 5.0      | 53.97 | -11.37   | -17.401%       | 42.01  | -11.18   | -21.019%       | 69.844 | -3.736   | -5.078%        |
| drop_first_and_last | 5.0      | 40.95 | -24.39   | -37.328%       | 29.814 | -23.376  | -43.948%       | 68.179 | -5.401   | -7.341%        |
| shuffle_order       | 5.0      | 60.39 | -4.95    | -7.576%        | 38.019 | -15.171  | -28.523%       | 68.494 | -5.086   | -6.912%        |
| random_word_delete  | 5.0      | 45.97 | -19.37   | -29.645%       | 30.394 | -22.796  | -42.857%       | 63.069 | -10.511  | -14.285%       |
| swap_syn_word_emb   | 5.0      | 45.85 | -19.49   | -29.829%       | 29.44  | -23.75   | -44.651%       | 57.571 | -16.009  | -21.757%       |
| swap_syn_word_net   | 5.0      | 47.78 | -17.56   | -26.875%       | 33.749 | -19.441  | -36.549%       | 59.423 | -14.157  | -19.240%       |
| back_trans          | 5.0      | 61.59 | -3.75    | -5.739%        | 45.611 | -7.579   | -14.248%       | 72.384 | -1.196   | -1.625%        |
| random_word_swap    | 5.0      | 62.73 | -2.61    | -3.994%        | 43.902 | -9.288   | -17.462%       | 71.021 | -2.559   | -3.478%        |
| nonsense            | 5.0      | 0.06  | -65.28   | -99.908%       | 0.064  | -53.126  | -99.880%       | 51.026 | -22.554  | -30.652%       |

Table 44: Performance and decrease ratio of Single Prompt on CLIP-BART against text corruptions given severity 1 to 4.

| corruption          | severity | VQA   |          |                | GQA    |          |                | NLVR   |          |                |
|---------------------|----------|-------|----------|----------------|--------|----------|----------------|--------|----------|----------------|
|                     |          | Acc   | Decrease | Decrease Ratio | Acc    | Decrease | Decrease Ratio | CIDer  | Decrease | Decrease Ratio |
| ocr                 | 1.0      | 39.57 | -4.43    | -10.068%       | 33.789 | -3.751   | -9.992%        | 51.629 | -0.321   | -0.618%        |
| typos               | 1.0      | 38.99 | -5.01    | -11.386%       | 33.447 | -4.093   | -10.902%       | 52.289 | 0.339    | 0.653%         |
| keyboard            | 1.0      | 38.12 | -5.88    | -13.364%       | 32.787 | -4.753   | -12.660%       | 51.844 | -0.106   | -0.203%        |
| spell_error         | 1.0      | 38.42 | -5.58    | -12.682%       | 33.686 | -3.854   | -10.267%       | 52.189 | 0.239    | 0.460%         |
| random_char_insert  | 1.0      | 37.28 | -6.72    | -15.273%       | 29.925 | -7.615   | -20.284%       | 51.672 | -0.278   | -0.535%        |
| random_char_replace | 1.0      | 35.6  | -8.4     | -19.091%       | 27.89  | -9.65    | -25.706%       | 52.361 | 0.411    | 0.791%         |
| random_char_swap    | 1.0      | 32.3  | -11.7    | -26.591%       | 24.694 | -12.846  | -34.220%       | 52.002 | 0.052    | 0.101%         |
| random_char_delete  | 1.0      | 35.77 | -8.23    | -18.705%       | 28.621 | -8.919   | -23.758%       | 51.758 | -0.192   | -0.369%        |
| random_word_insert  | 1.0      | 43.95 | -0.05    | -0.114%        | 36.953 | -0.587   | -1.563%        | 52.246 | 0.296    | 0.570%         |
| random_word_delete  | 1.0      | 43.86 | -0.14    | -0.318%        | 36.468 | -1.072   | -2.854%        | 51.787 | -0.163   | -0.314%        |
| swap_syn_word_emb   | 1.0      | 39.76 | -4.24    | -9.636%        | 34.998 | -2.542   | -6.772%        | 52.088 | 0.138    | 0.266%         |
| swap_syn_word_net   | 1.0      | 41.92 | -2.08    | -4.727%        | 35.085 | -2.455   | -6.540%        | 51.988 | 0.038    | 0.073%         |
| random_word_swap    | 1.0      | 43.96 | -0.04    | -0.091%        | 37.279 | -0.261   | -0.694%        | 51.916 | -0.034   | -0.065%        |

  

| corruption          | severity | VQA   |          |                | GQA    |          |                | NLVR   |          |                |
|---------------------|----------|-------|----------|----------------|--------|----------|----------------|--------|----------|----------------|
|                     |          | Acc   | Decrease | Decrease Ratio | Acc    | Decrease | Decrease Ratio | CIDer  | Decrease | Decrease Ratio |
| ocr                 | 2.0      | 39.83 | -4.17    | -9.477%        | 32.644 | -4.896   | -13.041%       | 52.189 | 0.239    | 0.460%         |
| typos               | 2.0      | 38.31 | -5.69    | -12.932%       | 31.857 | -5.683   | -15.138%       | 52.131 | 0.181    | 0.349%         |
| keyboard            | 2.0      | 37.82 | -6.18    | -14.045%       | 31.205 | -6.335   | -16.875%       | 51.514 | -0.436   | -0.839%        |
| spell_error         | 2.0      | 38.19 | -5.81    | -13.205%       | 32.43  | -5.11    | -13.613%       | 51.902 | -0.048   | -0.093%        |
| random_char_insert  | 2.0      | 33.14 | -10.86   | -24.682%       | 25.219 | -12.321  | -32.822%       | 51.945 | -0.005   | -0.010%        |
| random_char_replace | 2.0      | 30.73 | -13.27   | -30.159%       | 23.231 | -14.309  | -38.117%       | 51.959 | 0.009    | 0.018%         |
| random_char_swap    | 2.0      | 28.42 | -15.58   | -35.409%       | 21.061 | -16.479  | -43.898%       | 52.131 | 0.181    | 0.349%         |
| random_char_delete  | 2.0      | 30.9  | -13.1    | -29.773%       | 23.875 | -13.665  | -36.401%       | 51.801 | -0.149   | -0.286%        |
| random_word_insert  | 2.0      | 43.38 | -0.62    | -1.409%        | 35.538 | -2.002   | -5.332%        | 52.175 | 0.225    | 0.432%         |
| random_word_delete  | 2.0      | 39.26 | -4.74    | -10.773%       | 32.724 | -4.816   | -12.830%       | 52.103 | 0.153    | 0.294%         |
| swap_syn_word_emb   | 2.0      | 39.47 | -4.53    | -10.295%       | 33.376 | -4.164   | -11.093%       | 51.787 | -0.163   | -0.314%        |
| swap_syn_word_net   | 2.0      | 41.73 | -2.27    | -5.159%        | 34.274 | -3.266   | -8.700%        | 52.49  | 0.54     | 1.040%         |
| random_word_swap    | 2.0      | 43.28 | -0.72    | -1.636%        | 36.445 | -1.095   | -2.918%        | 51.801 | -0.149   | -0.286%        |

  

| corruption          | severity | VQA   |          |                | GQA    |          |                | NLVR   |          |                |
|---------------------|----------|-------|----------|----------------|--------|----------|----------------|--------|----------|----------------|
|                     |          | Acc   | Decrease | Decrease Ratio | Acc    | Decrease | Decrease Ratio | CIDer  | Decrease | Decrease Ratio |
| ocr                 | 3.0      | 38.04 | -5.96    | -13.545%       | 29.122 | -8.418   | -22.423%       | 52.361 | 0.411    | 0.791%         |
| typos               | 3.0      | 36.02 | -7.98    | -18.136%       | 27.977 | -9.563   | -25.473%       | 52.045 | 0.095    | 0.184%         |
| keyboard            | 3.0      | 35.37 | -8.63    | -19.614%       | 27.373 | -10.167  | -27.083%       | 51.801 | -0.149   | -0.286%        |
| spell_error         | 3.0      | 35.73 | -8.27    | -18.795%       | 28.494 | -9.046   | -24.096%       | 52.017 | 0.067    | 0.128%         |
| random_char_insert  | 3.0      | 30.11 | -13.89   | -31.568%       | 23.462 | -14.078  | -37.502%       | 52.074 | 0.124    | 0.239%         |
| random_char_replace | 3.0      | 28.27 | -15.73   | -35.750%       | 21.045 | -16.495  | -43.941%       | 51.902 | -0.048   | -0.093%        |
| random_char_swap    | 3.0      | 26.64 | -17.36   | -39.455%       | 19.661 | -17.879  | -47.626%       | 51.974 | 0.024    | 0.045%         |
| random_char_delete  | 3.0      | 28.16 | -15.84   | -36.000%       | 21.466 | -16.074  | -42.818%       | 52.734 | 0.784    | 1.510%         |
| random_word_insert  | 3.0      | 42.88 | -1.12    | -2.545%        | 34.409 | -3.131   | -8.340%        | 51.773 | -0.177   | -0.341%        |
| random_word_delete  | 3.0      | 36.96 | -7.04    | -16.000%       | 29.114 | -8.426   | -22.445%       | 51.816 | -0.134   | -0.259%        |
| swap_syn_word_emb   | 3.0      | 37.35 | -6.65    | -15.114%       | 30.776 | -6.764   | -18.018%       | 51.816 | -0.134   | -0.259%        |
| swap_syn_word_net   | 3.0      | 40.58 | -3.42    | -7.773%        | 31.897 | -5.643   | -15.032%       | 51.945 | -0.005   | -0.010%        |
| random_word_swap    | 3.0      | 43.21 | -0.79    | -1.795%        | 35.475 | -2.065   | -5.502%        | 51.773 | -0.177   | -0.341%        |

  

| corruption          | severity | VQA   |          |                | GQA    |          |                | NLVR   |          |                |
|---------------------|----------|-------|----------|----------------|--------|----------|----------------|--------|----------|----------------|
|                     |          | Acc   | Decrease | Decrease Ratio | Acc    | Decrease | Decrease Ratio | CIDer  | Decrease | Decrease Ratio |
| ocr                 | 4.0      | 35.04 | -8.96    | -20.364%       | 26.268 | -11.272  | -30.026%       | 51.974 | 0.024    | 0.045%         |
| keyboard            | 4.0      | 30.96 | -13.04   | -29.636%       | 23.048 | -14.492  | -38.604%       | 51.816 | -0.134   | -0.259%        |
| spell_error         | 4.0      | 31.55 | -12.45   | -28.295%       | 25.123 | -12.417  | -33.076%       | 51.801 | -0.149   | -0.286%        |
| random_char_insert  | 4.0      | 28.57 | -15.43   | -35.068%       | 21.053 | -16.487  | -43.919%       | 51.615 | -0.335   | -0.645%        |
| random_char_replace | 4.0      | 27.02 | -16.98   | -38.591%       | 20.114 | -17.426  | -46.419%       | 52.361 | 0.411    | 0.791%         |
| random_char_swap    | 4.0      | 25.94 | -18.06   | -41.045%       | 19.534 | -18.006  | -47.965%       | 51.715 | -0.235   | -0.452%        |
| random_char_delete  | 4.0      | 26.91 | -17.09   | -38.841%       | 19.82  | -17.72   | -47.202%       | 52.189 | 0.239    | 0.460%         |
| random_word_insert  | 4.0      | 42.33 | -1.67    | -3.795%        | 32.946 | -4.594   | -12.237%       | 51.859 | -0.091   | -0.176%        |
| random_word_delete  | 4.0      | 32.87 | -11.13   | -25.295%       | 26.133 | -11.407  | -30.386%       | 51.931 | -0.019   | -0.037%        |
| swap_syn_word_emb   | 4.0      | 35.94 | -8.06    | -18.318%       | 29.766 | -7.774   | -20.708%       | 51.816 | -0.134   | -0.259%        |
| swap_syn_word_net   | 4.0      | 39.88 | -4.12    | -9.364%        | 30.037 | -7.503   | -19.988%       | 51.672 | -0.278   | -0.535%        |
| random_word_swap    | 4.0      | 42.56 | -1.44    | -3.273%        | 34.815 | -2.725   | -7.260%        | 52.017 | 0.067    | 0.128%         |

Table 45: Performance and decrease ratio of Single Prompt on CLIP-BART against text corruptions given severity 5.

| corruption          | severity | VQA   |          |                | GQA    |          |                | NLVR   |          |                |
|---------------------|----------|-------|----------|----------------|--------|----------|----------------|--------|----------|----------------|
|                     |          | Acc   | Decrease | Decrease Ratio | Acc    | Decrease | Decrease Ratio | CIDer  | Decrease | Decrease Ratio |
| ocr                 | 5.0      | 34.13 | -9.87    | -22.432%       | 24.654 | -12.886  | -34.326%       | 51.873 | -0.077   | -0.148%        |
| punctuation         | 5.0      | 42.47 | -1.53    | -3.477%        | 34.751 | -2.789   | -7.429%        | 51.959 | 0.009    | 0.018%         |
| typos               | 5.0      | 26.09 | -17.91   | -40.705%       | 19.367 | -18.173  | -48.409%       | 51.744 | -0.206   | -0.397%        |
| keyboard            | 5.0      | 24.86 | -19.14   | -43.500%       | 18.501 | -19.039  | -50.718%       | 51.83  | -0.12    | -0.231%        |
| spell_error         | 5.0      | 28.3  | -15.7    | -35.682%       | 22.516 | -15.024  | -40.023%       | 51.859 | -0.091   | -0.176%        |
| random_char_insert  | 5.0      | 27.07 | -16.93   | -38.477%       | 20.17  | -17.37   | -46.270%       | 51.543 | -0.407   | -0.783%        |
| random_char_replace | 5.0      | 25.81 | -18.19   | -41.341%       | 19.463 | -18.077  | -48.155%       | 52.246 | 0.296    | 0.570%         |
| random_char_swap    | 5.0      | 25.38 | -18.62   | -42.318%       | 18.898 | -18.642  | -49.659%       | 51.572 | -0.378   | -0.728%        |
| random_char_delete  | 5.0      | 25.94 | -18.06   | -41.045%       | 19.502 | -18.038  | -48.049%       | 52.189 | 0.239    | 0.460%         |
| to_passive          | 5.0      | 40.84 | -3.16    | -7.182%        | 33.439 | -4.101   | -10.923%       | 52.419 | 0.469    | 0.902%         |
| tense               | 5.0      | 43.8  | -0.2     | -0.455%        | 37.462 | -0.078   | -0.207%        | 51.816 | -0.134   | -0.259%        |
| to_formal           | 5.0      | 43.79 | -0.21    | -0.477%        | 37.359 | -0.181   | -0.482%        | 52.289 | 0.339    | 0.653%         |
| to_casual           | 5.0      | 41.04 | -2.96    | -6.727%        | 33.749 | -3.791   | -10.097%       | 52.318 | 0.368    | 0.709%         |
| to_active           | 5.0      | 42.52 | -1.48    | -3.364%        | 36.071 | -1.469   | -3.913%        | 51.945 | -0.005   | -0.010%        |
| double_denial       | 5.0      | 43.93 | -0.07    | -0.159%        | 37.542 | 0.002    | 0.005%         | 51.974 | 0.024    | 0.045%         |
| insert_adv          | 5.0      | 42.61 | -1.39    | -3.159%        | 35.912 | -1.628   | -4.337%        | 52.304 | 0.354    | 0.681%         |
| append_irr          | 5.0      | 35.1  | -8.9     | -20.227%       | 26.833 | -10.707  | -28.523%       | 52.017 | 0.067    | 0.128%         |
| random_word_insert  | 5.0      | 41.52 | -2.48    | -5.636%        | 32.096 | -5.444   | -14.503%       | 51.443 | -0.507   | -0.977%        |
| drop_nn             | 5.0      | 35.18 | -8.82    | -20.045%       | 27.874 | -9.666   | -25.748%       | 52.074 | 0.124    | 0.239%         |
| drop_rand_one_nn    | 5.0      | 39.3  | -4.7     | -10.682%       | 33.415 | -4.125   | -10.987%       | 51.974 | 0.024    | 0.045%         |
| drop_vb             | 5.0      | 25.14 | -18.86   | -42.864%       | 20.385 | -17.155  | -45.698%       | 52.318 | 0.368    | 0.709%         |
| drop_vb_nn          | 5.0      | 25.92 | -18.08   | -41.091%       | 17.539 | -20.001  | -53.280%       | 52.462 | 0.512    | 0.985%         |
| only_nn             | 5.0      | 16.21 | -27.79   | -63.159%       | 12.824 | -24.716  | -65.839%       | 51.514 | -0.436   | -0.839%        |
| only_vb             | 5.0      | 37.9  | -6.1     | -13.864%       | 30.712 | -6.828   | -18.188%       | 51.959 | 0.009    | 0.018%         |
| only_vb_nn          | 5.0      | 35.09 | -8.91    | -20.250%       | 28.327 | -9.213   | -24.541%       | 51.543 | -0.407   | -0.783%        |
| drop_rand_one_vb    | 5.0      | 29.64 | -14.36   | -32.636%       | 25.64  | -11.9    | -31.700%       | 51.959 | 0.009    | 0.018%         |
| drop_first          | 5.0      | 20.03 | -23.97   | -54.477%       | 15.249 | -22.291  | -59.380%       | 52.16  | 0.21     | 0.405%         |
| drop_last           | 5.0      | 42.14 | -1.86    | -4.227%        | 36.683 | -0.857   | -2.283%        | 52.203 | 0.253    | 0.487%         |
| drop_first_and_last | 5.0      | 17.78 | -26.22   | -59.591%       | 14.756 | -22.784  | -60.693%       | 52.218 | 0.268    | 0.515%         |
| shuffle_order       | 5.0      | 40.09 | -3.91    | -8.886%        | 28.955 | -8.585   | -22.868%       | 52.304 | 0.354    | 0.681%         |
| random_word_delete  | 5.0      | 29.11 | -14.89   | -33.841%       | 23.414 | -14.126  | -37.629%       | 52.16  | 0.21     | 0.405%         |
| swap_syn_word_emb   | 5.0      | 35.43 | -8.57    | -19.477%       | 29.146 | -8.394   | -22.360%       | 52.002 | 0.052    | 0.101%         |
| swap_syn_word_net   | 5.0      | 35.96 | -8.04    | -18.273%       | 28.693 | -8.847   | -23.567%       | 51.629 | -0.321   | -0.618%        |
| back_trans          | 5.0      | 43.33 | -0.67    | -1.523%        | 36.357 | -1.183   | -3.151%        | 51.931 | -0.019   | -0.037%        |
| random_word_swap    | 5.0      | 42.27 | -1.73    | -3.932%        | 33.956 | -3.584   | -9.547%        | 51.945 | -0.005   | -0.010%        |
| nonsense            | 5.0      | 24.61 | -19.39   | -44.068%       | 18.0   | -19.54   | -52.052%       | 51.959 | 0.009    | 0.018%         |

Table 46: Performance and decrease ratio of Full Finetuning on CLIP-T5 against text corruptions given severity 1 to 4.

| corruption          | severity | VQA   |          |                | GQA    |          |                | NLVR   |          |                |
|---------------------|----------|-------|----------|----------------|--------|----------|----------------|--------|----------|----------------|
|                     |          | Acc   | Decrease | Decrease Ratio | Acc    | Decrease | Decrease Ratio | CIDer  | Decrease | Decrease Ratio |
| ocr                 | 1.0      | 56.07 | -10.22   | -15.417%       | 44.84  | -11.98   | -21.084%       | 60.686 | -13.374  | -18.058%       |
| punctuation         | 1.0      | 65.39 | -0.9     | -1.358%        | 54.333 | -2.487   | -4.377%        | 73.575 | -0.485   | -0.654%        |
| typos               | 1.0      | 58.19 | -8.1     | -12.219%       | 47.464 | -9.356   | -16.466%       | 70.977 | -3.083   | -4.162%        |
| keyboard            | 1.0      | 56.04 | -10.25   | -15.462%       | 45.047 | -11.773  | -20.720%       | 70.733 | -3.327   | -4.492%        |
| spell_error         | 1.0      | 58.06 | -8.23    | -12.415%       | 47.694 | -9.126   | -16.061%       | 70.777 | -3.283   | -4.434%        |
| random_char_insert  | 1.0      | 52.68 | -13.61   | -20.531%       | 35.721 | -21.099  | -37.133%       | 66.04  | -8.02    | -10.829%       |
| random_char_replace | 1.0      | 48.02 | -18.27   | -27.561%       | 32.088 | -24.732  | -43.527%       | 64.03  | -10.03   | -13.542%       |
| random_char_swap    | 1.0      | 41.2  | -25.09   | -37.849%       | 26.801 | -30.019  | -52.832%       | 59.767 | -14.293  | -19.299%       |
| random_char_delete  | 1.0      | 50.56 | -15.73   | -23.729%       | 35.976 | -20.844  | -36.685%       | 64.849 | -9.211   | -12.438%       |
| random_word_insert  | 1.0      | 66.18 | -0.11    | -0.166%        | 52.592 | -4.228   | -7.441%        | 73.633 | -0.427   | -0.577%        |
| random_word_delete  | 1.0      | 66.09 | -0.2     | -0.302%        | 54.412 | -2.408   | -4.237%        | 72.7   | -1.36    | -1.837%        |
| swap_syn_word_emb   | 1.0      | 55.34 | -10.95   | -16.518%       | 46.621 | -10.199  | -17.950%       | 67.935 | -6.125   | -8.271%        |
| swap_syn_word_net   | 1.0      | 58.79 | -7.5     | -11.314%       | 48.14  | -8.68    | -15.277%       | 71.064 | -2.996   | -4.046%        |
| random_word_swap    | 1.0      | 66.19 | -0.1     | -0.151%        | 54.412 | -2.408   | -4.237%        | 73.231 | -0.829   | -1.119%        |

  

| corruption          | severity | VQA   |          |                | GQA    |          |                | NLVR   |          |                |
|---------------------|----------|-------|----------|----------------|--------|----------|----------------|--------|----------|----------------|
|                     |          | Acc   | Decrease | Decrease Ratio | Acc    | Decrease | Decrease Ratio | CIDer  | Decrease | Decrease Ratio |
| ocr                 | 2.0      | 55.61 | -10.68   | -16.111%       | 40.412 | -16.408  | -28.877%       | 68.322 | -5.738   | -7.748%        |
| punctuation         | 2.0      | 65.31 | -0.98    | -1.478%        | 54.023 | -2.797   | -4.923%        | 74.135 | 0.075    | 0.102%         |
| typos               | 2.0      | 56.71 | -9.58    | -14.452%       | 42.853 | -13.967  | -24.582%       | 68.193 | -5.867   | -7.922%        |
| keyboard            | 2.0      | 55.57 | -10.72   | -16.171%       | 40.388 | -16.432  | -28.919%       | 68.064 | -5.996   | -8.097%        |
| spell_error         | 2.0      | 57.71 | -8.58    | -12.943%       | 44.785 | -12.035  | -21.182%       | 68.006 | -6.054   | -8.174%        |
| random_char_insert  | 2.0      | 40.83 | -25.46   | -38.407%       | 24.503 | -32.317  | -56.876%       | 59.811 | -14.249  | -19.240%       |
| random_char_replace | 2.0      | 33.87 | -32.42   | -48.906%       | 19.693 | -37.127  | -65.341%       | 56.969 | -17.091  | -23.078%       |
| random_char_swap    | 2.0      | 29.57 | -36.72   | -55.393%       | 18.016 | -38.804  | -68.294%       | 54.256 | -19.804  | -26.741%       |
| random_char_delete  | 2.0      | 39.07 | -27.22   | -41.062%       | 25.576 | -31.244  | -54.987%       | 58.059 | -16.001  | -21.605%       |
| random_word_insert  | 2.0      | 63.61 | -2.68    | -4.043%        | 47.909 | -8.911   | -15.683%       | 72.7   | -1.36    | -1.837%        |
| random_word_delete  | 2.0      | 60.78 | -5.51    | -8.312%        | 48.974 | -7.846   | -13.808%       | 69.772 | -4.288   | -5.790%        |
| swap_syn_word_emb   | 2.0      | 54.79 | -11.5    | -17.348%       | 42.447 | -14.373  | -25.295%       | 62.739 | -11.321  | -15.287%       |
| swap_syn_word_net   | 2.0      | 58.08 | -8.21    | -12.385%       | 45.731 | -11.089  | -19.517%       | 69.068 | -4.992   | -6.740%        |
| random_word_swap    | 2.0      | 64.72 | -1.57    | -2.368%        | 52.043 | -4.777   | -8.407%        | 72.599 | -1.461   | -1.972%        |

  

| corruption          | severity | VQA   |          |                | GQA    |          |                | NLVR   |          |                |
|---------------------|----------|-------|----------|----------------|--------|----------|----------------|--------|----------|----------------|
|                     |          | Acc   | Decrease | Decrease Ratio | Acc    | Decrease | Decrease Ratio | CIDer  | Decrease | Decrease Ratio |
| ocr                 | 3.0      | 50.9  | -15.39   | -23.216%       | 33.352 | -23.468  | -41.303%       | 63.715 | -10.345  | -13.969%       |
| punctuation         | 3.0      | 65.58 | -0.71    | -1.071%        | 54.476 | -2.344   | -4.125%        | 73.604 | -0.456   | -0.616%        |
| typos               | 3.0      | 52.43 | -13.86   | -20.908%       | 34.783 | -22.037  | -38.784%       | 65.035 | -9.025   | -12.186%       |
| keyboard            | 3.0      | 50.05 | -16.24   | -24.498%       | 33.074 | -23.746  | -41.792%       | 63.643 | -10.417  | -14.066%       |
| spell_error         | 3.0      | 53.33 | -12.96   | -19.550%       | 37.55  | -19.27   | -33.915%       | 64.088 | -9.972   | -13.465%       |
| random_char_insert  | 3.0      | 30.69 | -35.6    | -53.703%       | 18.389 | -38.431  | -67.636%       | 56.667 | -17.393  | -23.485%       |
| random_char_replace | 3.0      | 23.86 | -42.43   | -64.007%       | 13.555 | -43.265  | -76.143%       | 53.524 | -20.536  | -27.729%       |
| random_char_swap    | 3.0      | 23.29 | -43.0    | -64.866%       | 14.382 | -42.438  | -74.688%       | 51.887 | -22.173  | -29.939%       |
| random_char_delete  | 3.0      | 31.76 | -34.53   | -52.089%       | 20.043 | -36.777  | -64.726%       | 55.16  | -18.9    | -25.520%       |
| random_word_insert  | 3.0      | 62.9  | -3.39    | -5.114%        | 43.075 | -13.745  | -24.190%       | 71.58  | -2.48    | -3.348%        |
| random_word_delete  | 3.0      | 57.36 | -8.93    | -13.471%       | 44.3   | -12.52   | -22.035%       | 68.552 | -5.508   | -7.438%        |
| swap_syn_word_emb   | 3.0      | 50.63 | -15.66   | -23.623%       | 35.936 | -20.884  | -36.755%       | 59.911 | -14.149  | -19.105%       |
| swap_syn_word_net   | 3.0      | 54.35 | -11.94   | -18.012%       | 40.499 | -16.321  | -28.724%       | 64.518 | -9.542   | -12.884%       |
| random_word_swap    | 3.0      | 63.53 | -2.76    | -4.164%        | 49.801 | -7.019   | -12.353%       | 71.178 | -2.882   | -3.891%        |

  

| corruption          | severity | VQA   |          |                | GQA    |          |                | NLVR   |          |                |
|---------------------|----------|-------|----------|----------------|--------|----------|----------------|--------|----------|----------------|
|                     |          | Acc   | Decrease | Decrease Ratio | Acc    | Decrease | Decrease Ratio | CIDer  | Decrease | Decrease Ratio |
| ocr                 | 4.0      | 44.74 | -21.55   | -32.509%       | 28.017 | -28.803  | -50.691%       | 61.289 | -12.771  | -17.244%       |
| punctuation         | 4.0      | 65.59 | -0.7     | -1.056%        | 54.365 | -2.455   | -4.321%        | 73.992 | -0.068   | -0.092%        |
| typos               | 4.0      | 44.4  | -21.89   | -33.022%       | 28.431 | -28.389  | -49.964%       | 61.705 | -12.355  | -16.682%       |
| spell_error         | 4.0      | 45.25 | -21.04   | -31.739%       | 31.166 | -25.654  | -45.150%       | 61.418 | -12.642  | -17.070%       |
| random_char_insert  | 4.0      | 22.93 | -43.36   | -65.410%       | 15.018 | -41.802  | -73.569%       | 54.385 | -19.675  | -26.566%       |
| random_char_replace | 4.0      | 16.96 | -49.33   | -74.415%       | 8.881  | -47.939  | -84.371%       | 52.619 | -21.441  | -28.950%       |
| random_char_swap    | 4.0      | 19.0  | -47.29   | -71.338%       | 11.989 | -44.831  | -78.900%       | 51.816 | -22.244  | -30.036%       |
| random_char_delete  | 4.0      | 26.11 | -40.18   | -60.612%       | 16.354 | -40.466  | -71.218%       | 53.725 | -20.335  | -27.458%       |
| random_word_insert  | 4.0      | 61.25 | -5.04    | -7.603%        | 39.307 | -17.513  | -30.822%       | 70.748 | -3.312   | -4.472%        |
| random_word_delete  | 4.0      | 50.96 | -15.33   | -23.126%       | 37.939 | -18.881  | -33.229%       | 65.509 | -8.551   | -11.546%       |
| swap_syn_word_emb   | 4.0      | 46.4  | -19.89   | -30.005%       | 32.938 | -23.882  | -42.030%       | 57.126 | -16.934  | -22.865%       |
| swap_syn_word_net   | 4.0      | 51.32 | -14.97   | -22.583%       | 37.581 | -19.239  | -33.859%       | 60.988 | -13.072  | -17.651%       |
| random_word_swap    | 4.0      | 63.09 | -3.2     | -4.827%        | 47.877 | -8.943   | -15.739%       | 70.762 | -3.298   | -4.453%        |

Table 47: Performance and decrease ratio of Full Finetuning on CLIP-T5 against text corruptions given severity 5.

| corruption          | severity | VQA   |          |                | GQA    |          |                | NLVR   |          |                |
|---------------------|----------|-------|----------|----------------|--------|----------|----------------|--------|----------|----------------|
|                     |          | Acc   | Decrease | Decrease Ratio | Acc    | Decrease | Decrease Ratio | CIDer  | Decrease | Decrease Ratio |
| ocr                 | 5.0      | 41.68 | -24.61   | -37.125%       | 25.592 | -31.228  | -54.959%       | 57.227 | -16.833  | -22.729%       |
| punctuation         | 5.0      | 65.39 | -0.9     | -1.358%        | 54.055 | -2.765   | -4.867%        | 73.805 | -0.255   | -0.344%        |
| typos               | 5.0      | 31.24 | -35.05   | -52.874%       | 20.393 | -36.427  | -64.110%       | 53.854 | -20.206  | -27.283%       |
| keyboard            | 5.0      | 26.9  | -39.39   | -59.421%       | 18.071 | -38.749  | -68.196%       | 52.72  | -21.34   | -28.815%       |
| spell_error         | 5.0      | 38.79 | -27.5    | -41.484%       | 26.864 | -29.956  | -52.720%       | 58.634 | -15.426  | -20.830%       |
| random_char_insert  | 5.0      | 17.18 | -49.11   | -74.084%       | 11.759 | -45.061  | -79.305%       | 52.706 | -21.354  | -28.834%       |
| random_char_replace | 5.0      | 11.99 | -54.3    | -81.913%       | 6.71   | -50.11   | -88.191%       | 52.289 | -21.771  | -29.396%       |
| random_char_swap    | 5.0      | 16.77 | -49.52   | -74.702%       | 12.14  | -44.68   | -78.634%       | 52.232 | -21.828  | -29.473%       |
| random_char_delete  | 5.0      | 22.44 | -43.85   | -66.149%       | 14.573 | -42.247  | -74.352%       | 52.16  | -21.9    | -29.570%       |
| to_passive          | 5.0      | 63.3  | -2.99    | -4.510%        | 52.003 | -4.817   | -8.477%        | 72.083 | -1.977   | -2.670%        |
| tense               | 5.0      | 65.47 | -0.82    | -1.237%        | 54.826 | -1.994   | -3.510%        | 73.963 | -0.097   | -0.131%        |
| to_formal           | 5.0      | 65.84 | -0.45    | -0.679%        | 54.571 | -2.249   | -3.957%        | 73.762 | -0.298   | -0.402%        |
| to_casual           | 5.0      | 63.61 | -2.68    | -4.043%        | 52.027 | -4.793   | -8.435%        | 72.269 | -1.791   | -2.418%        |
| to_active           | 5.0      | 64.81 | -1.48    | -2.233%        | 54.269 | -2.551   | -4.489%        | 73.274 | -0.786   | -1.061%        |
| double_denial       | 5.0      | 66.22 | -0.07    | -0.106%        | 55.565 | -1.255   | -2.208%        | 74.107 | 0.047    | 0.063%         |
| insert_adv          | 5.0      | 61.91 | -4.38    | -6.607%        | 50.779 | -6.041   | -10.632%       | 71.207 | -2.853   | -3.852%        |
| append_irr          | 5.0      | 64.51 | -1.78    | -2.685%        | 48.426 | -8.394   | -14.773%       | 67.317 | -6.743   | -9.104%        |
| random_word_insert  | 5.0      | 58.7  | -7.59    | -11.450%       | 35.793 | -21.027  | -37.007%       | 69.585 | -4.475   | -6.042%        |
| drop_nn             | 5.0      | 43.96 | -22.33   | -33.685%       | 31.627 | -25.193  | -44.339%       | 63.873 | -10.187  | -13.756%       |
| drop_rand_one_nn    | 5.0      | 55.85 | -10.44   | -15.749%       | 45.699 | -11.121  | -19.573%       | 71.107 | -2.953   | -3.988%        |
| drop_vb             | 5.0      | 56.77 | -9.52    | -14.361%       | 38.559 | -18.261  | -32.138%       | 70.934 | -3.126   | -4.220%        |
| drop_vb_nn          | 5.0      | 42.66 | -23.63   | -35.646%       | 26.189 | -30.631  | -53.910%       | 60.844 | -13.216  | -17.845%       |
| only_nn             | 5.0      | 15.14 | -51.15   | -77.161%       | 14.462 | -42.358  | -74.548%       | 54.672 | -19.388  | -26.179%       |
| only_vb             | 5.0      | 51.32 | -14.97   | -22.583%       | 40.483 | -16.337  | -28.752%       | 67.159 | -6.901   | -9.317%        |
| only_vb_nn          | 5.0      | 42.42 | -23.87   | -36.008%       | 28.59  | -28.23   | -49.684%       | 57.629 | -16.431  | -22.186%       |
| drop_rand_one_vb    | 5.0      | 61.59 | -4.7     | -7.090%        | 46.08  | -10.74   | -18.901%       | 72.241 | -1.819   | -2.457%        |
| drop_first          | 5.0      | 58.55 | -7.74    | -11.676%       | 42.932 | -13.888  | -24.442%       | 72.442 | -1.618   | -2.185%        |
| drop_last           | 5.0      | 51.9  | -14.39   | -21.708%       | 46.359 | -10.461  | -18.411%       | 69.714 | -4.346   | -5.868%        |
| drop_first_and_last | 5.0      | 38.01 | -28.28   | -42.661%       | 31.953 | -24.867  | -43.765%       | 68.58  | -5.48    | -7.399%        |
| shuffle_order       | 5.0      | 57.01 | -9.28    | -13.999%       | 38.265 | -18.555  | -32.655%       | 66.557 | -7.503   | -10.131%       |
| random_word_delete  | 5.0      | 42.79 | -23.5    | -35.450%       | 30.919 | -25.901  | -45.584%       | 62.882 | -11.178  | -15.093%       |
| swap_syn_word_emb   | 5.0      | 46.23 | -20.06   | -30.261%       | 31.969 | -24.851  | -43.737%       | 57.887 | -16.173  | -21.837%       |
| swap_syn_word_net   | 5.0      | 47.24 | -19.05   | -28.737%       | 37.558 | -19.262  | -33.901%       | 59.294 | -14.766  | -19.938%       |
| back_trans          | 5.0      | 62.6  | -3.69    | -5.566%        | 51.503 | -5.317   | -9.358%        | 72.944 | -1.116   | -1.507%        |
| random_word_swap    | 5.0      | 61.84 | -4.45    | -6.713%        | 46.542 | -10.278  | -18.089%       | 70.461 | -3.599   | -4.860%        |
| nonsense            | 5.0      | 0.0   | -66.29   | -100.000%      | 12.339 | -44.481  | -78.284%       | 51.227 | -22.833  | -30.830%       |

Table 48: Performance and decrease ratio of Hyperformer on CLIP-T5 against text corruptions given severity 1 to 4.

| corruption          | severity | VQA   |          |                | GQA    |          |                | NLVR   |          |                |
|---------------------|----------|-------|----------|----------------|--------|----------|----------------|--------|----------|----------------|
|                     |          | Acc   | Decrease | Decrease Ratio | Acc    | Decrease | Decrease Ratio | CIDer  | Decrease | Decrease Ratio |
| ocr                 | 1.0      | 54.25 | -10.93   | -16.769%       | 44.705 | -9.945   | -18.198%       | 58.691 | -11.869  | -16.821%       |
| punctuation         | 1.0      | 64.64 | -0.54    | -0.828%        | 52.457 | -2.193   | -4.013%        | 70.647 | 0.087    | 0.124%         |
| typos               | 1.0      | 56.88 | -8.3     | -12.734%       | 47.05  | -7.6     | -13.906%       | 68.982 | -1.578   | -2.236%        |
| spell_error         | 1.0      | 56.94 | -8.24    | -12.642%       | 46.573 | -8.077   | -14.779%       | 68.064 | -2.496   | -3.538%        |
| random_char_insert  | 1.0      | 50.88 | -14.3    | -21.939%       | 37.001 | -17.649  | -32.294%       | 64.762 | -5.798   | -8.216%        |
| random_char_replace | 1.0      | 46.86 | -18.32   | -28.107%       | 33.765 | -20.885  | -38.215%       | 61.705 | -8.855   | -12.549%       |
| random_char_swap    | 1.0      | 40.92 | -24.26   | -37.220%       | 27.699 | -26.951  | -49.315%       | 58.174 | -12.386  | -17.554%       |
| random_char_delete  | 1.0      | 49.57 | -15.61   | -23.949%       | 36.723 | -17.927  | -32.804%       | 63.557 | -7.003   | -9.925%        |
| random_word_insert  | 1.0      | 65.13 | -0.05    | -0.077%        | 50.97  | -3.68    | -6.734%        | 70.188 | -0.372   | -0.527%        |
| random_word_delete  | 1.0      | 65.01 | -0.17    | -0.261%        | 52.409 | -2.241   | -4.101%        | 69.528 | -1.032   | -1.463%        |
| swap_syn_word_emb   | 1.0      | 54.91 | -10.27   | -15.756%       | 46.836 | -7.814   | -14.299%       | 65.868 | -4.692   | -6.650%        |
| swap_syn_word_net   | 1.0      | 58.65 | -6.53    | -10.018%       | 47.456 | -7.194   | -13.164%       | 68.58  | -1.98    | -2.805%        |
| random_word_swap    | 1.0      | 65.09 | -0.09    | -0.138%        | 52.767 | -1.883   | -3.446%        | 69.844 | -0.716   | -1.015%        |

  

| corruption          | severity | VQA   |          |                | GQA    |          |                | NLVR   |          |                |
|---------------------|----------|-------|----------|----------------|--------|----------|----------------|--------|----------|----------------|
|                     |          | Acc   | Decrease | Decrease Ratio | Acc    | Decrease | Decrease Ratio | CIDer  | Decrease | Decrease Ratio |
| ocr                 | 2.0      | 53.56 | -11.62   | -17.828%       | 40.444 | -14.206  | -25.995%       | 64.978 | -5.582   | -7.911%        |
| punctuation         | 2.0      | 64.71 | -0.47    | -0.721%        | 52.139 | -2.511   | -4.595%        | 70.274 | -0.286   | -0.405%        |
| typos               | 2.0      | 55.96 | -9.22    | -14.145%       | 42.36  | -12.29   | -22.489%       | 66.399 | -4.161   | -5.897%        |
| spell_error         | 2.0      | 56.7  | -8.48    | -13.010%       | 44.093 | -10.557  | -19.318%       | 65.652 | -4.908   | -6.955%        |
| random_char_insert  | 2.0      | 40.34 | -24.84   | -38.110%       | 27.588 | -27.062  | -49.519%       | 58.49  | -12.07   | -17.106%       |
| random_char_replace | 2.0      | 35.49 | -29.69   | -45.551%       | 24.249 | -30.401  | -55.629%       | 55.519 | -15.041  | -21.317%       |
| random_char_swap    | 2.0      | 31.74 | -33.44   | -51.304%       | 18.85  | -35.8    | -65.507%       | 52.605 | -17.955  | -25.446%       |
| random_char_delete  | 2.0      | 38.59 | -26.59   | -40.795%       | 26.578 | -28.072  | -51.367%       | 57.643 | -12.917  | -18.306%       |
| random_word_insert  | 2.0      | 63.76 | -1.42    | -2.179%        | 47.973 | -6.677   | -12.218%       | 69.14  | -1.42    | -2.012%        |
| random_word_delete  | 2.0      | 60.14 | -5.04    | -7.732%        | 47.265 | -7.385   | -13.513%       | 67.159 | -3.401   | -4.819%        |
| swap_syn_word_emb   | 2.0      | 54.15 | -11.03   | -16.922%       | 43.608 | -11.042  | -20.205%       | 62.007 | -8.553   | -12.122%       |
| swap_syn_word_net   | 2.0      | 58.08 | -7.1     | -10.893%       | 45.158 | -9.492   | -17.368%       | 66.212 | -4.348   | -6.162%        |
| random_word_swap    | 2.0      | 63.54 | -1.64    | -2.516%        | 50.7   | -3.95    | -7.228%        | 69.528 | -1.032   | -1.463%        |

  

| corruption          | severity | VQA   |          |                | GQA    |          |                | NLVR   |          |                |
|---------------------|----------|-------|----------|----------------|--------|----------|----------------|--------|----------|----------------|
|                     |          | Acc   | Decrease | Decrease Ratio | Acc    | Decrease | Decrease Ratio | CIDer  | Decrease | Decrease Ratio |
| ocr                 | 3.0      | 48.9  | -16.28   | -24.977%       | 33.908 | -20.742  | -37.954%       | 62.322 | -8.238   | -11.675%       |
| punctuation         | 3.0      | 64.59 | -0.59    | -0.905%        | 52.361 | -2.289   | -4.188%        | 70.159 | -0.401   | -0.568%        |
| typos               | 3.0      | 51.02 | -14.16   | -21.724%       | 35.864 | -18.786  | -34.375%       | 63.772 | -6.788   | -9.620%        |
| spell_error         | 3.0      | 51.79 | -13.39   | -20.543%       | 37.995 | -16.655  | -30.476%       | 63.227 | -7.333   | -10.393%       |
| random_char_insert  | 3.0      | 33.48 | -31.7    | -48.635%       | 22.571 | -32.079  | -58.699%       | 54.816 | -15.744  | -22.314%       |
| random_char_replace | 3.0      | 30.02 | -35.16   | -53.943%       | 19.097 | -35.553  | -65.056%       | 52.232 | -18.328  | -25.975%       |
| random_char_swap    | 3.0      | 27.97 | -37.21   | -57.088%       | 14.653 | -39.997  | -73.188%       | 51.328 | -19.232  | -27.257%       |
| random_char_delete  | 3.0      | 32.67 | -32.51   | -49.877%       | 20.798 | -33.852  | -61.943%       | 54.213 | -16.347  | -23.168%       |
| random_word_insert  | 3.0      | 63.1  | -2.08    | -3.191%        | 43.64  | -11.01   | -20.147%       | 69.112 | -1.448   | -2.053%        |
| random_word_delete  | 3.0      | 57.38 | -7.8     | -11.967%       | 43.314 | -11.336  | -20.743%       | 66.356 | -4.204   | -5.959%        |
| swap_syn_word_emb   | 3.0      | 50.18 | -15.0    | -23.013%       | 38.384 | -16.266  | -29.763%       | 58.375 | -12.185  | -17.269%       |
| swap_syn_word_net   | 3.0      | 54.48 | -10.7    | -16.416%       | 40.571 | -14.079  | -25.762%       | 63.341 | -7.219   | -10.230%       |
| random_word_swap    | 3.0      | 63.53 | -2.76    | -4.164%        | 49.801 | -7.019   | -12.353%       | 71.178 | -2.882   | -3.891%        |

  

| corruption          | severity | VQA   |          |                | GQA    |          |                | NLVR   |          |                |
|---------------------|----------|-------|----------|----------------|--------|----------|----------------|--------|----------|----------------|
|                     |          | Acc   | Decrease | Decrease Ratio | Acc    | Decrease | Decrease Ratio | CIDer  | Decrease | Decrease Ratio |
| ocr                 | 4.0      | 42.03 | -23.15   | -35.517%       | 28.717 | -25.933  | -47.453%       | 58.49  | -12.07   | -17.106%       |
| punctuation         | 4.0      | 64.62 | -0.56    | -0.859%        | 52.298 | -2.352   | -4.304%        | 70.518 | -0.042   | -0.059%        |
| typos               | 4.0      | 42.24 | -22.94   | -35.195%       | 29.997 | -24.653  | -45.111%       | 60.456 | -10.104  | -14.319%       |
| spell_error         | 4.0      | 44.06 | -21.12   | -32.403%       | 32.318 | -22.332  | -40.863%       | 60.729 | -9.831   | -13.933%       |
| random_char_insert  | 4.0      | 29.46 | -35.72   | -54.802%       | 19.145 | -35.505  | -64.969%       | 52.361 | -18.199  | -25.792%       |
| random_char_replace | 4.0      | 27.43 | -37.75   | -57.917%       | 16.243 | -38.407  | -70.279%       | 50.754 | -19.806  | -28.070%       |
| random_char_swap    | 4.0      | 26.3  | -38.88   | -59.650%       | 12.514 | -42.136  | -77.102%       | 50.897 | -19.663  | -27.867%       |
| random_char_delete  | 4.0      | 29.24 | -35.94   | -55.140%       | 15.837 | -38.813  | -71.021%       | 52.002 | -18.558  | -26.301%       |
| random_word_insert  | 4.0      | 61.76 | -3.42    | -5.247%        | 40.642 | -14.008  | -25.631%       | 68.997 | -1.563   | -2.216%        |
| random_word_delete  | 4.0      | 51.41 | -13.77   | -21.126%       | 37.311 | -17.339  | -31.727%       | 63.93  | -6.63    | -9.396%        |
| swap_syn_word_emb   | 4.0      | 46.37 | -18.81   | -28.859%       | 35.602 | -19.048  | -34.855%       | 56.61  | -13.95   | -19.771%       |
| swap_syn_word_net   | 4.0      | 51.49 | -13.69   | -21.003%       | 38.122 | -16.528  | -30.243%       | 60.643 | -9.917   | -14.055%       |
| random_word_swap    | 4.0      | 61.82 | -3.36    | -5.155%        | 47.71  | -6.94    | -12.698%       | 68.265 | -2.295   | -3.253%        |



Table 49: Performance and decrease ratio of Hyperformer on CLIP-T5 against text corruptions given severity 5.

| corruption          | severity | VQA   |          |                | GQA    |          |                | NLVR   |          |                |
|---------------------|----------|-------|----------|----------------|--------|----------|----------------|--------|----------|----------------|
|                     |          | Acc   | Decrease | Decrease Ratio | Acc    | Decrease | Decrease Ratio | CIDer  | Decrease | Decrease Ratio |
| ocr                 | 5.0      | 38.87 | -26.31   | -40.365%       | 26.109 | -28.541  | -52.225%       | 55.189 | -15.371  | -21.785%       |
| punctuation         | 5.0      | 64.59 | -0.59    | -0.905%        | 52.488 | -2.162   | -3.955%        | 70.375 | -0.185   | -0.263%        |
| typos               | 5.0      | 29.7  | -35.48   | -54.434%       | 20.639 | -34.011  | -62.234%       | 52.806 | -17.754  | -25.161%       |
| keyboard            | 5.0      | 26.47 | -38.71   | -59.389%       | 18.532 | -36.118  | -66.089%       | 51.758 | -18.802  | -26.646%       |
| spell_error         | 5.0      | 37.8  | -27.38   | -42.007%       | 27.914 | -26.736  | -48.923%       | 57.844 | -12.716  | -18.021%       |
| random_char_insert  | 5.0      | 27.43 | -37.75   | -57.917%       | 17.189 | -37.461  | -68.548%       | 51.17  | -19.39   | -27.480%       |
| random_char_replace | 5.0      | 26.18 | -39.0    | -59.834%       | 15.169 | -39.481  | -72.243%       | 50.84  | -19.72   | -27.948%       |
| random_char_swap    | 5.0      | 25.84 | -39.34   | -60.356%       | 12.403 | -42.247  | -77.305%       | 51.572 | -18.988  | -26.911%       |
| random_char_delete  | 5.0      | 27.25 | -37.93   | -58.193%       | 13.786 | -40.864  | -74.774%       | 51.945 | -18.615  | -26.382%       |
| to_passive          | 5.0      | 62.68 | -2.5     | -3.836%        | 50.318 | -4.332   | -7.927%        | 68.107 | -2.453   | -3.477%        |
| tense               | 5.0      | 64.34 | -0.84    | -1.289%        | 53.458 | -1.192   | -2.180%        | 70.504 | -0.056   | -0.080%        |
| to_formal           | 5.0      | 64.71 | -0.47    | -0.721%        | 52.687 | -1.963   | -3.592%        | 69.987 | -0.573   | -0.812%        |
| to_casual           | 5.0      | 62.48 | -2.7     | -4.142%        | 50.111 | -4.539   | -8.305%        | 69.485 | -1.075   | -1.524%        |
| to_active           | 5.0      | 63.79 | -1.39    | -2.133%        | 52.52  | -2.13    | -3.897%        | 69.614 | -0.946   | -1.341%        |
| double_denial       | 5.0      | 65.13 | -0.05    | -0.077%        | 53.602 | -1.048   | -1.919%        | 70.561 | 0.001    | 0.002%         |
| insert_adv          | 5.0      | 61.04 | -4.14    | -6.352%        | 50.62  | -4.03    | -7.374%        | 68.537 | -2.023   | -2.867%        |
| append_irr          | 5.0      | 62.95 | -2.23    | -3.421%        | 45.262 | -9.388   | -17.179%       | 64.016 | -6.544   | -9.274%        |
| random_word_insert  | 5.0      | 59.59 | -5.59    | -8.576%        | 37.534 | -17.116  | -31.320%       | 68.25  | -2.31    | -3.273%        |
| drop_nn             | 5.0      | 45.81 | -19.37   | -29.718%       | 33.376 | -21.274  | -38.928%       | 63.054 | -7.506   | -10.637%       |
| drop_rand_one_nn    | 5.0      | 56.58 | -8.6     | -13.194%       | 46.009 | -8.641   | -15.812%       | 68.193 | -2.367   | -3.355%        |
| drop_vb             | 5.0      | 57.72 | -7.46    | -11.445%       | 37.2   | -17.45   | -31.931%       | 68.781 | -1.779   | -2.521%        |
| drop_vb_nn          | 5.0      | 46.33 | -18.85   | -28.920%       | 24.312 | -30.338  | -55.513%       | 61.547 | -9.013   | -12.773%       |
| only_nn             | 5.0      | 33.76 | -31.42   | -48.205%       | 13.85  | -40.8    | -74.658%       | 53.165 | -17.395  | -24.653%       |
| only_vb             | 5.0      | 52.2  | -12.98   | -19.914%       | 39.521 | -15.129  | -27.683%       | 63.715 | -6.845   | -9.701%        |
| only_vb_nn          | 5.0      | 41.64 | -23.54   | -36.115%       | 29.369 | -25.281  | -46.260%       | 55.993 | -14.567  | -20.645%       |
| drop_rand_one_vb    | 5.0      | 62.16 | -3.02    | -4.633%        | 45.421 | -9.229   | -16.888%       | 69.413 | -1.147   | -1.626%        |
| drop_first          | 5.0      | 58.75 | -6.43    | -9.865%        | 41.334 | -13.316  | -24.366%       | 69.384 | -1.176   | -1.666%        |
| drop_last           | 5.0      | 52.99 | -12.19   | -18.702%       | 47.042 | -7.608   | -13.920%       | 67.719 | -2.841   | -4.026%        |
| drop_first_and_last | 5.0      | 46.58 | -18.6    | -28.536%       | 33.646 | -21.004  | -38.434%       | 66.959 | -3.601   | -5.104%        |
| shuffle_order       | 5.0      | 57.7  | -7.48    | -11.476%       | 39.426 | -15.224  | -27.857%       | 65.839 | -4.721   | -6.691%        |
| random_word_delete  | 5.0      | 46.23 | -18.95   | -29.073%       | 31.762 | -22.888  | -41.881%       | 62.265 | -8.295   | -11.756%       |
| swap_syn_word_emb   | 5.0      | 45.5  | -19.68   | -30.193%       | 34.568 | -20.082  | -36.746%       | 56.926 | -13.634  | -19.323%       |
| swap_syn_word_net   | 5.0      | 47.61 | -17.57   | -26.956%       | 36.572 | -18.078  | -33.080%       | 58.088 | -12.472  | -17.676%       |
| back_trans          | 5.0      | 61.99 | -3.19    | -4.894%        | 50.541 | -4.109   | -7.519%        | 69.987 | -0.573   | -0.812%        |
| random_word_swap    | 5.0      | 61.02 | -4.16    | -6.382%        | 46.414 | -8.236   | -15.070%       | 67.36  | -3.2     | -4.535%        |
| nonsense            | 5.0      | 15.33 | -49.85   | -76.481%       | 3.999  | -50.651  | -92.682%       | 50.768 | -19.792  | -28.050%       |

Table 50: Performance and decrease ratio of Multiple Adapters on CLIP-T5 against text corruptions given severity 1 to 4.

| corruption          | severity | VQA   |          |                | GQA    |          |                | NLVR   |          |                |
|---------------------|----------|-------|----------|----------------|--------|----------|----------------|--------|----------|----------------|
|                     |          | Acc   | Decrease | Decrease Ratio | Acc    | Decrease | Decrease Ratio | CIDer  | Decrease | Decrease Ratio |
| ocr                 | 1.0      | 56.21 | -9.94    | -15.026%       | 42.368 | -13.292  | -23.881%       | 51.486 | -0.454   | -0.875%        |
| punctuation         | 1.0      | 65.86 | -0.29    | -0.438%        | 52.25  | -3.41    | -6.127%        | 51.945 | 0.005    | 0.009%         |
| typos               | 1.0      | 58.0  | -8.15    | -12.320%       | 44.482 | -11.178  | -20.082%       | 51.887 | -0.053   | -0.101%        |
| spell_error         | 1.0      | 58.27 | -7.88    | -11.912%       | 45.627 | -10.033  | -18.025%       | 51.931 | -0.009   | -0.018%        |
| random_char_insert  | 1.0      | 52.05 | -14.1    | -21.315%       | 33.948 | -21.712  | -39.008%       | 51.457 | -0.483   | -0.930%        |
| random_char_replace | 1.0      | 48.43 | -17.72   | -26.788%       | 29.488 | -26.172  | -47.021%       | 51.6   | -0.34    | -0.654%        |
| random_char_swap    | 1.0      | 42.1  | -24.05   | -36.357%       | 24.694 | -30.966  | -55.634%       | 51.084 | -0.856   | -1.649%        |
| random_char_delete  | 1.0      | 50.7  | -15.45   | -23.356%       | 33.543 | -22.117  | -39.736%       | 51.73  | -0.21    | -0.405%        |
| random_word_insert  | 1.0      | 66.12 | -0.03    | -0.045%        | 51.026 | -4.634   | -8.326%        | 51.916 | -0.024   | -0.046%        |
| random_word_delete  | 1.0      | 65.99 | -0.16    | -0.242%        | 52.886 | -2.774   | -4.984%        | 51.974 | 0.034    | 0.065%         |
| swap_syn_word_emb   | 1.0      | 55.5  | -10.65   | -16.100%       | 46.367 | -9.293   | -16.697%       | 51.959 | 0.019    | 0.037%         |
| swap_syn_word_net   | 1.0      | 58.86 | -7.29    | -11.020%       | 46.303 | -9.357   | -16.811%       | 52.017 | 0.077    | 0.148%         |
| random_word_swap    | 1.0      | 66.05 | -0.1     | -0.151%        | 53.148 | -2.512   | -4.512%        | 51.974 | 0.034    | 0.065%         |

  

| corruption          | severity | VQA   |          |                | GQA    |          |                | NLVR   |          |                |
|---------------------|----------|-------|----------|----------------|--------|----------|----------------|--------|----------|----------------|
|                     |          | Acc   | Decrease | Decrease Ratio | Acc    | Decrease | Decrease Ratio | CIDer  | Decrease | Decrease Ratio |
| ocr                 | 2.0      | 55.52 | -10.63   | -16.070%       | 36.739 | -18.921  | -33.994%       | 51.816 | -0.124   | -0.239%        |
| punctuation         | 2.0      | 65.8  | -0.35    | -0.529%        | 52.266 | -3.394   | -6.098%        | 51.945 | 0.005    | 0.009%         |
| typos               | 2.0      | 56.95 | -9.2     | -13.908%       | 39.808 | -15.852  | -28.481%       | 51.873 | -0.067   | -0.129%        |
| spell_error         | 2.0      | 57.52 | -8.63    | -13.046%       | 42.193 | -13.467  | -24.196%       | 51.931 | -0.009   | -0.018%        |
| random_char_insert  | 2.0      | 41.01 | -25.14   | -38.005%       | 23.199 | -32.461  | -58.320%       | 51.026 | -0.914   | -1.759%        |
| random_char_replace | 2.0      | 35.89 | -30.26   | -45.745%       | 18.914 | -36.746  | -66.019%       | 51.084 | -0.856   | -1.649%        |
| random_char_swap    | 2.0      | 32.14 | -34.01   | -51.413%       | 17.236 | -38.424  | -69.033%       | 50.926 | -1.014   | -1.953%        |
| random_char_delete  | 2.0      | 39.09 | -27.06   | -40.907%       | 22.905 | -32.755  | -58.848%       | 51.443 | -0.497   | -0.958%        |
| random_word_insert  | 2.0      | 64.5  | -1.65    | -2.494%        | 46.391 | -9.269   | -16.654%       | 51.787 | -0.153   | -0.295%        |
| random_word_delete  | 2.0      | 61.29 | -4.86    | -7.347%        | 46.748 | -8.912   | -16.011%       | 51.801 | -0.139   | -0.267%        |
| swap_syn_word_emb   | 2.0      | 54.73 | -11.42   | -17.264%       | 42.113 | -13.547  | -24.338%       | 52.074 | 0.134    | 0.258%         |
| swap_syn_word_net   | 2.0      | 58.27 | -7.88    | -11.912%       | 43.028 | -12.632  | -22.696%       | 52.447 | 0.507    | 0.977%         |
| random_word_swap    | 2.0      | 64.61 | -1.54    | -2.328%        | 50.413 | -5.247   | -9.426%        | 51.873 | -0.067   | -0.129%        |

  

| corruption          | severity | VQA   |          |                | GQA    |          |                | NLVR   |          |                |
|---------------------|----------|-------|----------|----------------|--------|----------|----------------|--------|----------|----------------|
|                     |          | Acc   | Decrease | Decrease Ratio | Acc    | Decrease | Decrease Ratio | CIDer  | Decrease | Decrease Ratio |
| ocr                 | 3.0      | 50.2  | -15.95   | -24.112%       | 29.734 | -25.926  | -46.578%       | 51.758 | -0.182   | -0.350%        |
| punctuation         | 3.0      | 65.93 | -0.22    | -0.333%        | 52.29  | -3.37    | -6.055%        | 52.017 | 0.077    | 0.148%         |
| keyboard            | 3.0      | 49.68 | -16.47   | -24.898%       | 29.575 | -26.085  | -46.864%       | 51.629 | -0.311   | -0.599%        |
| spell_error         | 3.0      | 53.07 | -13.08   | -19.773%       | 35.339 | -20.321  | -36.508%       | 52.045 | 0.105    | 0.203%         |
| random_char_insert  | 3.0      | 33.16 | -32.99   | -49.872%       | 18.262 | -37.398  | -67.190%       | 50.624 | -1.316   | -2.533%        |
| random_char_replace | 3.0      | 29.7  | -36.45   | -55.102%       | 15.257 | -40.403  | -72.589%       | 50.452 | -1.488   | -2.865%        |
| random_char_swap    | 3.0      | 27.97 | -38.18   | -57.717%       | 14.136 | -41.524  | -74.603%       | 50.495 | -1.445   | -2.782%        |
| random_char_delete  | 3.0      | 32.99 | -33.16   | -50.128%       | 17.3   | -38.36   | -68.918%       | 51.184 | -0.756   | -1.455%        |
| random_word_insert  | 3.0      | 64.18 | -1.97    | -2.978%        | 41.867 | -13.793  | -24.781%       | 51.916 | -0.024   | -0.046%        |
| random_word_delete  | 3.0      | 58.46 | -7.69    | -11.625%       | 42.527 | -13.133  | -23.596%       | 51.744 | -0.196   | -0.377%        |
| swap_syn_word_emb   | 3.0      | 50.68 | -15.47   | -23.386%       | 35.96  | -19.7    | -35.394%       | 51.744 | -0.196   | -0.377%        |
| swap_syn_word_net   | 3.0      | 54.64 | -11.51   | -17.400%       | 38.003 | -17.657  | -31.723%       | 52.261 | 0.321    | 0.617%         |
| random_word_swap    | 3.0      | 63.53 | -2.76    | -4.164%        | 49.801 | -7.019   | -12.353%       | 71.178 | -2.882   | -3.891%        |

  

| corruption          | severity | VQA   |          |                | GQA    |          |                | NLVR   |          |                |
|---------------------|----------|-------|----------|----------------|--------|----------|----------------|--------|----------|----------------|
|                     |          | Acc   | Decrease | Decrease Ratio | Acc    | Decrease | Decrease Ratio | CIDer  | Decrease | Decrease Ratio |
| ocr                 | 4.0      | 43.59 | -22.56   | -34.104%       | 23.97  | -31.69   | -56.934%       | 51.543 | -0.397   | -0.764%        |
| punctuation         | 4.0      | 65.79 | -0.36    | -0.544%        | 52.218 | -3.442   | -6.184%        | 51.974 | 0.034    | 0.065%         |
| keyboard            | 4.0      | 39.63 | -26.52   | -40.091%       | 23.048 | -32.612  | -58.591%       | 51.428 | -0.512   | -0.985%        |
| spell_error         | 4.0      | 45.18 | -20.97   | -31.701%       | 29.035 | -26.625  | -47.835%       | 51.801 | -0.139   | -0.267%        |
| random_char_insert  | 4.0      | 29.28 | -36.87   | -55.737%       | 15.217 | -40.443  | -72.661%       | 50.61  | -1.33    | -2.561%        |
| random_char_replace | 4.0      | 27.14 | -39.01   | -58.972%       | 11.83  | -43.83   | -78.746%       | 50.969 | -0.971   | -1.870%        |
| random_char_swap    | 4.0      | 26.33 | -39.82   | -60.197%       | 12.896 | -42.764  | -76.832%       | 50.38  | -1.56    | -3.003%        |
| random_char_delete  | 4.0      | 29.29 | -36.86   | -55.722%       | 14.08  | -41.58   | -74.703%       | 51.112 | -0.828   | -1.593%        |
| random_word_insert  | 4.0      | 62.99 | -3.16    | -4.777%        | 39.116 | -16.544  | -29.723%       | 51.73  | -0.21    | -0.405%        |
| random_word_delete  | 4.0      | 52.44 | -13.71   | -20.726%       | 36.095 | -19.565  | -35.151%       | 51.959 | 0.019    | 0.037%         |
| swap_syn_word_emb   | 4.0      | 46.4  | -19.75   | -29.856%       | 33.368 | -22.292  | -40.051%       | 51.801 | -0.139   | -0.267%        |
| swap_syn_word_net   | 4.0      | 51.54 | -14.61   | -22.086%       | 35.069 | -20.591  | -36.994%       | 51.988 | 0.048    | 0.092%         |
| random_word_swap    | 4.0      | 63.41 | -2.74    | -4.142%        | 47.392 | -8.268   | -14.854%       | 51.73  | -0.21    | -0.405%        |

Table 51: Performance and decrease ratio of Multiple Adapters on CLIP-T5 against text corruptions given severity 5.

| corruption          | severity | VQA   |          |                | GQA    |          |                | NLVR   |          |                |
|---------------------|----------|-------|----------|----------------|--------|----------|----------------|--------|----------|----------------|
|                     |          | Acc   | Decrease | Decrease Ratio | Acc    | Decrease | Decrease Ratio | CIDer  | Decrease | Decrease Ratio |
| ocr                 | 5.0      | 40.21 | -25.94   | -39.214%       | 20.52  | -35.14   | -63.133%       | 51.414 | -0.526   | -1.013%        |
| punctuation         | 5.0      | 65.68 | -0.47    | -0.711%        | 52.512 | -3.148   | -5.655%        | 51.988 | 0.048    | 0.092%         |
| typos               | 5.0      | 30.16 | -35.99   | -54.407%       | 18.739 | -36.921  | -66.333%       | 50.94  | -1.0     | -1.925%        |
| keyboard            | 5.0      | 26.89 | -39.26   | -59.350%       | 15.575 | -40.085  | -72.018%       | 51.199 | -0.741   | -1.428%        |
| spell_error         | 5.0      | 38.47 | -27.68   | -41.844%       | 25.751 | -29.909  | -53.735%       | 51.658 | -0.282   | -0.543%        |
| random_char_insert  | 5.0      | 26.97 | -39.18   | -59.229%       | 14.032 | -41.628  | -74.789%       | 50.294 | -1.646   | -3.169%        |
| random_char_replace | 5.0      | 25.94 | -40.21   | -60.786%       | 10.097 | -45.563  | -81.860%       | 50.682 | -1.258   | -2.422%        |
| random_char_swap    | 5.0      | 26.0  | -40.15   | -60.695%       | 13.46  | -42.2    | -75.817%       | 50.495 | -1.445   | -2.782%        |
| random_char_delete  | 5.0      | 26.92 | -39.23   | -59.305%       | 13.166 | -42.494  | -76.346%       | 51.127 | -0.813   | -1.566%        |
| to_passive          | 5.0      | 63.94 | -2.21    | -3.341%        | 49.793 | -5.867   | -10.540%       | 51.931 | -0.009   | -0.018%        |
| tense               | 5.0      | 65.6  | -0.55    | -0.831%        | 53.927 | -1.733   | -3.113%        | 51.873 | -0.067   | -0.129%        |
| to_formal           | 5.0      | 65.77 | -0.38    | -0.574%        | 53.307 | -2.353   | -4.227%        | 51.959 | 0.019    | 0.037%         |
| to_casual           | 5.0      | 63.87 | -2.28    | -3.447%        | 50.366 | -5.294   | -9.512%        | 52.017 | 0.077    | 0.148%         |
| to_active           | 5.0      | 65.03 | -1.12    | -1.693%        | 52.457 | -3.203   | -5.755%        | 51.83  | -0.11    | -0.212%        |
| double_denial       | 5.0      | 66.06 | -0.09    | -0.136%        | 54.174 | -1.486   | -2.670%        | 51.959 | 0.019    | 0.037%         |
| insert_adv          | 5.0      | 62.02 | -4.13    | -6.243%        | 49.316 | -6.344   | -11.397%       | 52.189 | 0.249    | 0.479%         |
| append_irr          | 5.0      | 63.63 | -2.52    | -3.810%        | 45.381 | -10.279  | -18.468%       | 51.844 | -0.096   | -0.184%        |
| random_word_insert  | 5.0      | 61.21 | -4.94    | -7.468%        | 35.324 | -20.336  | -36.537%       | 51.744 | -0.196   | -0.377%        |
| drop_nn             | 5.0      | 46.98 | -19.17   | -28.980%       | 30.879 | -24.781  | -44.522%       | 51.615 | -0.325   | -0.626%        |
| drop_rand_one_nn    | 5.0      | 57.98 | -8.17    | -12.351%       | 43.393 | -12.267  | -22.039%       | 51.887 | -0.053   | -0.101%        |
| drop_vb             | 5.0      | 58.97 | -7.18    | -10.854%       | 33.893 | -21.767  | -39.108%       | 51.988 | 0.048    | 0.092%         |
| drop_vb_nn          | 5.0      | 47.81 | -18.34   | -27.725%       | 21.379 | -34.281  | -61.591%       | 51.443 | -0.497   | -0.958%        |
| only_nn             | 5.0      | 32.59 | -33.56   | -50.733%       | 9.199  | -46.461  | -83.474%       | 51.141 | -0.799   | -1.538%        |
| only_vb             | 5.0      | 53.28 | -12.87   | -19.456%       | 39.816 | -15.844  | -28.466%       | 51.873 | -0.067   | -0.129%        |
| only_vb_nn          | 5.0      | 43.48 | -22.67   | -34.271%       | 24.853 | -30.807  | -55.349%       | 51.328 | -0.612   | -1.179%        |
| drop_rand_one_vb    | 5.0      | 62.94 | -3.21    | -4.853%        | 42.543 | -13.117  | -23.567%       | 51.959 | 0.019    | 0.037%         |
| drop_first          | 5.0      | 60.92 | -5.23    | -7.906%        | 35.721 | -19.939  | -35.823%       | 51.931 | -0.009   | -0.018%        |
| drop_last           | 5.0      | 53.82 | -12.33   | -18.639%       | 45.754 | -9.906   | -17.796%       | 51.873 | -0.067   | -0.129%        |
| drop_first_and_last | 5.0      | 47.88 | -18.27   | -27.619%       | 28.049 | -27.611  | -49.607%       | 51.701 | -0.239   | -0.460%        |
| shuffle_order       | 5.0      | 59.47 | -6.68    | -10.098%       | 38.504 | -17.156  | -30.823%       | 51.83  | -0.11    | -0.212%        |
| random_word_delete  | 5.0      | 46.73 | -19.42   | -29.358%       | 29.13  | -26.53   | -47.664%       | 51.902 | -0.038   | -0.074%        |
| swap_syn_word_emb   | 5.0      | 45.91 | -20.24   | -30.597%       | 32.676 | -22.984  | -41.293%       | 51.701 | -0.239   | -0.460%        |
| swap_syn_word_net   | 5.0      | 46.74 | -19.41   | -29.342%       | 33.996 | -21.664  | -38.922%       | 51.931 | -0.009   | -0.018%        |
| back_trans          | 5.0      | 62.86 | -3.29    | -4.974%        | 50.445 | -5.215   | -9.369%        | 51.887 | -0.053   | -0.101%        |
| random_word_swap    | 5.0      | 62.52 | -3.63    | -5.488%        | 46.16  | -9.5     | -17.068%       | 51.859 | -0.081   | -0.156%        |
| nonsense            | 5.0      | 13.3  | -52.85   | -79.894%       | 11.671 | -43.989  | -79.031%       | 51.887 | -0.053   | -0.101%        |

Table 52: Performance and decrease ratio of Multiple Compacters on CLIP-T5 against text corruptions given severity 1 to 4.

| corruption          | severity | VQA   |          |                | GQA    |          |                | NLVR   |          |                |
|---------------------|----------|-------|----------|----------------|--------|----------|----------------|--------|----------|----------------|
|                     |          | Acc   | Decrease | Decrease Ratio | Acc    | Decrease | Decrease Ratio | CIDer  | Decrease | Decrease Ratio |
| ocr                 | 1.0      | 56.09 | -9.41    | -14.366%       | 44.069 | -10.611  | -19.406%       | 52.835 | 0.205    | 0.389%         |
| punctuation         | 1.0      | 65.02 | -0.48    | -0.733%        | 52.671 | -2.009   | -3.673%        | 52.763 | 0.133    | 0.253%         |
| typos               | 1.0      | 58.04 | -7.46    | -11.389%       | 45.103 | -9.577   | -17.515%       | 52.591 | -0.039   | -0.075%        |
| keyboard            | 1.0      | 56.15 | -9.35    | -14.275%       | 44.125 | -10.555  | -19.304%       | 52.749 | 0.119    | 0.225%         |
| spell_error         | 1.0      | 58.07 | -7.43    | -11.344%       | 46.581 | -8.099   | -14.811%       | 52.634 | 0.004    | 0.007%         |
| random_char_insert  | 1.0      | 52.37 | -13.13   | -20.046%       | 35.92  | -18.76   | -34.309%       | 52.95  | 0.32     | 0.607%         |
| random_char_replace | 1.0      | 48.48 | -17.02   | -25.985%       | 32.199 | -22.481  | -41.114%       | 52.634 | 0.004    | 0.007%         |
| random_char_swap    | 1.0      | 41.69 | -23.81   | -36.351%       | 26.976 | -27.704  | -50.666%       | 52.921 | 0.291    | 0.553%         |
| random_char_delete  | 1.0      | 50.45 | -15.05   | -22.977%       | 35.681 | -18.999  | -34.745%       | 52.806 | 0.176    | 0.335%         |
| random_word_insert  | 1.0      | 65.51 | 0.01     | 0.015%         | 51.089 | -3.591   | -6.567%        | 52.634 | 0.004    | 0.007%         |
| random_word_delete  | 1.0      | 65.42 | -0.08    | -0.122%        | 52.679 | -2.001   | -3.659%        | 52.505 | -0.125   | -0.238%        |
| swap_syn_word_emb   | 1.0      | 55.32 | -10.18   | -15.542%       | 46.184 | -8.496   | -15.538%       | 52.691 | 0.061    | 0.116%         |
| swap_syn_word_net   | 1.0      | 58.51 | -6.99    | -10.672%       | 46.963 | -7.717   | -14.113%       | 52.835 | 0.205    | 0.389%         |
| random_word_swap    | 1.0      | 65.49 | -0.01    | -0.015%        | 52.759 | -1.921   | -3.514%        | 52.576 | -0.054   | -0.102%        |

  

| corruption          | severity | VQA   |          |                | GQA    |          |                | NLVR   |          |                |
|---------------------|----------|-------|----------|----------------|--------|----------|----------------|--------|----------|----------------|
|                     |          | Acc   | Decrease | Decrease Ratio | Acc    | Decrease | Decrease Ratio | CIDer  | Decrease | Decrease Ratio |
| ocr                 | 2.0      | 55.24 | -10.26   | -15.664%       | 40.11  | -14.57   | -26.646%       | 52.462 | -0.168   | -0.320%        |
| punctuation         | 2.0      | 65.13 | -0.37    | -0.565%        | 52.703 | -1.977   | -3.615%        | 52.505 | -0.125   | -0.238%        |
| typos               | 2.0      | 56.76 | -8.74    | -13.344%       | 40.945 | -13.735  | -25.120%       | 52.576 | -0.054   | -0.102%        |
| keyboard            | 2.0      | 55.84 | -9.66    | -14.748%       | 38.949 | -15.731  | -28.769%       | 52.447 | -0.183   | -0.347%        |
| spell_error         | 2.0      | 57.51 | -7.99    | -12.198%       | 43.353 | -11.327  | -20.714%       | 52.72  | 0.09     | 0.171%         |
| random_char_insert  | 2.0      | 41.9  | -23.6    | -36.031%       | 26.483 | -28.197  | -51.568%       | 52.806 | 0.176    | 0.335%         |
| random_char_replace | 2.0      | 36.5  | -29.0    | -44.275%       | 23.048 | -31.632  | -57.849%       | 52.806 | 0.176    | 0.335%         |
| random_char_swap    | 2.0      | 32.15 | -33.35   | -50.916%       | 20.862 | -33.818  | -61.847%       | 52.863 | 0.233    | 0.444%         |
| random_char_delete  | 2.0      | 39.44 | -26.06   | -39.786%       | 26.332 | -28.348  | -51.844%       | 52.447 | -0.183   | -0.347%        |
| random_word_insert  | 2.0      | 64.02 | -1.48    | -2.260%        | 47.957 | -6.723   | -12.296%       | 52.591 | -0.039   | -0.075%        |
| random_word_delete  | 2.0      | 60.66 | -4.84    | -7.389%        | 46.78  | -7.9     | -14.448%       | 52.619 | -0.011   | -0.020%        |
| swap_syn_word_emb   | 2.0      | 54.6  | -10.9    | -16.641%       | 42.638 | -12.042  | -22.023%       | 52.634 | 0.004    | 0.007%         |
| swap_syn_word_net   | 2.0      | 58.0  | -7.5     | -11.450%       | 44.101 | -10.579  | -19.347%       | 52.763 | 0.133    | 0.253%         |
| random_word_swap    | 2.0      | 63.9  | -1.6     | -2.443%        | 50.326 | -4.354   | -7.963%        | 52.691 | 0.061    | 0.116%         |

  

| corruption          | severity | VQA   |          |                | GQA    |          |                | NLVR   |          |                |
|---------------------|----------|-------|----------|----------------|--------|----------|----------------|--------|----------|----------------|
|                     |          | Acc   | Decrease | Decrease Ratio | Acc    | Decrease | Decrease Ratio | CIDer  | Decrease | Decrease Ratio |
| ocr                 | 3.0      | 50.66 | -14.84   | -22.656%       | 33.241 | -21.439  | -39.209%       | 52.863 | 0.233    | 0.444%         |
| punctuation         | 3.0      | 65.1  | -0.4     | -0.611%        | 52.576 | -2.104   | -3.848%        | 52.663 | 0.033    | 0.062%         |
| typos               | 3.0      | 52.35 | -13.15   | -20.076%       | 34.425 | -20.255  | -37.042%       | 52.734 | 0.104    | 0.198%         |
| keyboard            | 3.0      | 49.94 | -15.56   | -23.756%       | 32.39  | -22.29   | -40.765%       | 52.562 | -0.068   | -0.129%        |
| spell_error         | 3.0      | 52.94 | -12.56   | -19.176%       | 36.58  | -18.1    | -33.102%       | 52.39  | -0.24    | -0.456%        |
| random_char_insert  | 3.0      | 34.36 | -31.14   | -47.542%       | 21.943 | -32.737  | -59.870%       | 52.964 | 0.334    | 0.635%         |
| random_char_replace | 3.0      | 30.41 | -35.09   | -53.573%       | 20.019 | -34.661  | -63.389%       | 52.648 | 0.018    | 0.035%         |
| random_char_swap    | 3.0      | 28.04 | -37.46   | -57.191%       | 18.819 | -35.861  | -65.584%       | 52.691 | 0.061    | 0.116%         |
| random_char_delete  | 3.0      | 33.37 | -32.13   | -49.053%       | 21.744 | -32.936  | -60.234%       | 52.347 | -0.283   | -0.538%        |
| random_word_insert  | 3.0      | 62.96 | -2.54    | -3.878%        | 43.059 | -11.621  | -21.252%       | 52.878 | 0.248    | 0.471%         |
| random_word_delete  | 3.0      | 57.83 | -7.67    | -11.710%       | 42.892 | -11.788  | -21.558%       | 52.591 | -0.039   | -0.075%        |
| swap_syn_word_emb   | 3.0      | 50.75 | -14.75   | -22.519%       | 36.993 | -17.687  | -32.346%       | 52.691 | 0.061    | 0.116%         |
| swap_syn_word_net   | 3.0      | 54.67 | -10.83   | -16.534%       | 39.235 | -15.445  | -28.246%       | 52.663 | 0.033    | 0.062%         |
| random_word_swap    | 3.0      | 63.04 | -2.46    | -3.756%        | 48.227 | -6.453   | -11.801%       | 52.576 | -0.054   | -0.102%        |

  

| corruption          | severity | VQA   |          |                | GQA    |          |                | NLVR   |          |                |
|---------------------|----------|-------|----------|----------------|--------|----------|----------------|--------|----------|----------------|
|                     |          | Acc   | Decrease | Decrease Ratio | Acc    | Decrease | Decrease Ratio | CIDer  | Decrease | Decrease Ratio |
| ocr                 | 4.0      | 44.0  | -21.5    | -32.824%       | 28.224 | -26.456  | -48.384%       | 52.964 | 0.334    | 0.635%         |
| punctuation         | 4.0      | 65.04 | -0.46    | -0.702%        | 52.512 | -2.168   | -3.964%        | 52.663 | 0.033    | 0.062%         |
| keyboard            | 4.0      | 40.22 | -25.28   | -38.595%       | 25.409 | -29.271  | -53.531%       | 52.691 | 0.061    | 0.116%         |
| spell_error         | 4.0      | 45.31 | -20.19   | -30.824%       | 31.03  | -23.65   | -43.251%       | 52.548 | -0.082   | -0.156%        |
| random_char_insert  | 4.0      | 29.9  | -35.6    | -54.351%       | 20.067 | -34.613  | -63.301%       | 52.49  | -0.14    | -0.265%        |
| random_char_replace | 4.0      | 27.68 | -37.82   | -57.740%       | 18.445 | -36.235  | -66.268%       | 52.605 | -0.025   | -0.047%        |
| random_char_swap    | 4.0      | 26.24 | -39.26   | -59.939%       | 18.246 | -36.434  | -66.631%       | 52.562 | -0.068   | -0.129%        |
| random_char_delete  | 4.0      | 29.73 | -35.77   | -54.611%       | 18.954 | -35.726  | -65.337%       | 52.892 | 0.262    | 0.498%         |
| random_word_insert  | 4.0      | 61.52 | -3.98    | -6.076%        | 39.696 | -14.984  | -27.403%       | 52.72  | 0.09     | 0.171%         |
| random_word_delete  | 4.0      | 51.76 | -13.74   | -20.977%       | 36.818 | -17.862  | -32.666%       | 52.835 | 0.205    | 0.389%         |
| swap_syn_word_emb   | 4.0      | 46.65 | -18.85   | -28.779%       | 33.916 | -20.764  | -37.973%       | 52.634 | 0.004    | 0.007%         |
| swap_syn_word_net   | 4.0      | 51.37 | -14.13   | -21.573%       | 36.953 | -17.727  | -32.419%       | 52.878 | 0.248    | 0.471%         |
| random_word_swap    | 4.0      | 62.28 | -3.22    | -4.916%        | 47.48  | -7.2     | -13.168%       | 52.663 | 0.033    | 0.062%         |

Table 53: Performance and decrease ratio of Multiple Compacters on CLIP-T5 against text corruptions given severity 5.

| corruption          | severity | VQA   |          |                | GQA    |          |                | NLVR   |          |                |
|---------------------|----------|-------|----------|----------------|--------|----------|----------------|--------|----------|----------------|
|                     |          | Acc   | Decrease | Decrease Ratio | Acc    | Decrease | Decrease Ratio | CIDer  | Decrease | Decrease Ratio |
| ocr                 | 5.0      | 41.0  | -24.5    | -37.405%       | 25.648 | -29.032  | -53.094%       | 52.691 | 0.061    | 0.116%         |
| punctuation         | 5.0      | 65.07 | -0.43    | -0.656%        | 52.449 | -2.231   | -4.081%        | 52.605 | -0.025   | -0.047%        |
| typos               | 5.0      | 30.91 | -34.59   | -52.809%       | 20.472 | -34.208  | -62.560%       | 52.749 | 0.119    | 0.225%         |
| keyboard            | 5.0      | 26.77 | -38.73   | -59.130%       | 18.501 | -36.179  | -66.166%       | 52.619 | -0.011   | -0.020%        |
| spell_error         | 5.0      | 38.84 | -26.66   | -40.702%       | 27.5   | -27.18   | -49.707%       | 52.576 | -0.054   | -0.102%        |
| random_char_insert  | 5.0      | 27.82 | -37.68   | -57.527%       | 18.978 | -35.702  | -65.293%       | 52.792 | 0.162    | 0.307%         |
| random_char_replace | 5.0      | 26.28 | -39.22   | -59.878%       | 17.825 | -36.855  | -67.402%       | 52.677 | 0.047    | 0.089%         |
| random_char_swap    | 5.0      | 25.39 | -40.11   | -61.237%       | 19.025 | -35.655  | -65.206%       | 52.619 | -0.011   | -0.020%        |
| random_char_delete  | 5.0      | 27.45 | -38.05   | -58.092%       | 18.127 | -36.553  | -66.849%       | 52.734 | 0.104    | 0.198%         |
| to_passive          | 5.0      | 63.2  | -2.3     | -3.511%        | 50.533 | -4.147   | -7.585%        | 52.892 | 0.262    | 0.498%         |
| tense               | 5.0      | 64.88 | -0.62    | -0.947%        | 53.299 | -1.381   | -2.525%        | 52.72  | 0.09     | 0.171%         |
| to_formal           | 5.0      | 65.13 | -0.37    | -0.565%        | 53.029 | -1.651   | -3.019%        | 52.663 | 0.033    | 0.062%         |
| to_casual           | 5.0      | 63.47 | -2.03    | -3.099%        | 50.628 | -4.052   | -7.410%        | 52.591 | -0.039   | -0.075%        |
| to_active           | 5.0      | 64.3  | -1.2     | -1.832%        | 52.52  | -2.16    | -3.950%        | 52.706 | 0.076    | 0.144%         |
| double_denial       | 5.0      | 65.38 | -0.12    | -0.183%        | 53.689 | -0.991   | -1.812%        | 52.605 | -0.025   | -0.047%        |
| insert_adv          | 5.0      | 61.87 | -3.63    | -5.542%        | 48.815 | -5.865   | -10.725%       | 52.691 | 0.061    | 0.116%         |
| append_irr          | 5.0      | 63.24 | -2.26    | -3.450%        | 46.247 | -8.433   | -15.422%       | 52.749 | 0.119    | 0.225%         |
| random_word_insert  | 5.0      | 59.47 | -6.03    | -9.206%        | 36.19  | -18.49   | -33.815%       | 52.749 | 0.119    | 0.225%         |
| drop_nn             | 5.0      | 44.59 | -20.91   | -31.924%       | 31.476 | -23.204  | -42.437%       | 52.691 | 0.061    | 0.116%         |
| drop_rand_one_nn    | 5.0      | 57.16 | -8.34    | -12.733%       | 44.785 | -9.895   | -18.097%       | 52.447 | -0.183   | -0.347%        |
| drop_vb             | 5.0      | 58.28 | -7.22    | -11.023%       | 39.911 | -14.769  | -27.010%       | 52.404 | -0.226   | -0.429%        |
| drop_vb_nn          | 5.0      | 44.28 | -21.22   | -32.397%       | 26.117 | -28.563  | -52.237%       | 52.691 | 0.061    | 0.116%         |
| only_nn             | 5.0      | 28.05 | -37.45   | -57.176%       | 18.373 | -36.307  | -66.398%       | 52.375 | -0.255   | -0.484%        |
| only_vb             | 5.0      | 52.25 | -13.25   | -20.229%       | 39.172 | -15.508  | -28.362%       | 52.232 | -0.398   | -0.756%        |
| only_vb_nn          | 5.0      | 42.0  | -23.5    | -35.878%       | 29.09  | -25.59   | -46.799%       | 52.332 | -0.298   | -0.565%        |
| drop_rand_one_vb    | 5.0      | 62.42 | -3.08    | -4.702%        | 45.929 | -8.751   | -16.003%       | 52.519 | -0.111   | -0.211%        |
| drop_first          | 5.0      | 59.21 | -6.29    | -9.603%        | 40.483 | -14.197  | -25.963%       | 52.548 | -0.082   | -0.156%        |
| drop_last           | 5.0      | 53.91 | -11.59   | -17.695%       | 46.724 | -7.956   | -14.549%       | 52.505 | -0.125   | -0.238%        |
| drop_first_and_last | 5.0      | 46.85 | -18.65   | -28.473%       | 33.535 | -21.145  | -38.671%       | 52.835 | 0.205    | 0.389%         |
| shuffle_order       | 5.0      | 57.27 | -8.23    | -12.565%       | 39.959 | -14.721  | -26.923%       | 52.576 | -0.054   | -0.102%        |
| random_word_delete  | 5.0      | 46.13 | -19.37   | -29.573%       | 30.951 | -23.729  | -43.396%       | 52.677 | 0.047    | 0.089%         |
| swap_syn_word_emb   | 5.0      | 46.29 | -19.21   | -29.328%       | 32.716 | -21.964  | -40.169%       | 52.648 | 0.018    | 0.035%         |
| swap_syn_word_net   | 5.0      | 48.37 | -17.13   | -26.153%       | 35.88  | -18.8    | -34.382%       | 52.591 | -0.039   | -0.075%        |
| back_trans          | 5.0      | 62.16 | -3.34    | -5.099%        | 50.262 | -4.418   | -8.079%        | 52.648 | 0.018    | 0.035%         |
| random_word_swap    | 5.0      | 61.58 | -3.92    | -5.985%        | 46.096 | -8.584   | -15.698%       | 52.648 | 0.018    | 0.035%         |
| nonsense            | 5.0      | 22.31 | -43.19   | -65.939%       | 9.103  | -45.577  | -83.352%       | 52.663 | 0.033    | 0.062%         |

Table 54: Performance and decrease ratio of Single Adapter on CLIP-T5 against text corruptions given severity 1 to 4.

| corruption          | severity | VQA   |          |                | GQA    |          |                | NLVR   |          |                |
|---------------------|----------|-------|----------|----------------|--------|----------|----------------|--------|----------|----------------|
|                     |          | Acc   | Decrease | Decrease Ratio | Acc    | Decrease | Decrease Ratio | CIDer  | Decrease | Decrease Ratio |
| ocr                 | 1.0      | 56.11 | -10.3    | -15.510%       | 40.539 | -15.361  | -27.479%       | 58.892 | -13.888  | -19.082%       |
| punctuation         | 1.0      | 65.58 | -0.83    | -1.250%        | 48.998 | -6.902   | -12.347%       | 72.686 | -0.094   | -0.130%        |
| typos               | 1.0      | 58.35 | -8.06    | -12.137%       | 42.399 | -13.501  | -24.151%       | 69.829 | -2.951   | -4.054%        |
| keyboard            | 1.0      | 56.45 | -9.96    | -14.998%       | 41.0   | -14.9    | -26.654%       | 69.7   | -3.08    | -4.232%        |
| spell_error         | 1.0      | 58.46 | -7.95    | -11.971%       | 43.274 | -12.626  | -22.587%       | 69.47  | -3.31    | -4.547%        |
| random_char_insert  | 1.0      | 52.25 | -14.16   | -21.322%       | 34.179 | -21.721  | -38.857%       | 64.49  | -8.29    | -11.391%       |
| random_char_replace | 1.0      | 48.57 | -17.84   | -26.863%       | 32.199 | -23.701  | -42.399%       | 62.566 | -10.214  | -14.034%       |
| random_char_swap    | 1.0      | 42.15 | -24.26   | -36.531%       | 27.477 | -28.423  | -50.847%       | 58.16  | -14.62   | -20.088%       |
| random_char_delete  | 1.0      | 51.55 | -14.86   | -22.376%       | 34.123 | -21.777  | -38.957%       | 62.868 | -9.912   | -13.619%       |
| random_word_insert  | 1.0      | 66.19 | -0.22    | -0.331%        | 47.329 | -8.571   | -15.333%       | 72.083 | -0.697   | -0.958%        |
| random_word_delete  | 1.0      | 66.26 | -0.15    | -0.226%        | 48.72  | -7.18    | -12.844%       | 71.738 | -1.042   | -1.431%        |
| swap_syn_word_emb   | 1.0      | 56.0  | -10.41   | -15.675%       | 42.487 | -13.413  | -23.995%       | 66.528 | -6.252   | -8.590%        |
| swap_syn_word_net   | 1.0      | 59.38 | -7.03    | -10.586%       | 44.292 | -11.608  | -20.766%       | 70.403 | -2.377   | -3.266%        |
| random_word_swap    | 1.0      | 66.33 | -0.08    | -0.120%        | 48.672 | -7.228   | -12.930%       | 72.083 | -0.697   | -0.958%        |

  

| corruption          | severity | VQA   |          |                | GQA    |          |                | NLVR   |          |                |
|---------------------|----------|-------|----------|----------------|--------|----------|----------------|--------|----------|----------------|
|                     |          | Acc   | Decrease | Decrease Ratio | Acc    | Decrease | Decrease Ratio | CIDer  | Decrease | Decrease Ratio |
| ocr                 | 2.0      | 55.18 | -11.23   | -16.910%       | 36.826 | -19.074  | -34.121%       | 66.37  | -6.41    | -8.807%        |
| punctuation         | 2.0      | 65.91 | -0.5     | -0.753%        | 48.847 | -7.053   | -12.617%       | 72.7   | -0.08    | -0.110%        |
| typos               | 2.0      | 57.18 | -9.23    | -13.899%       | 38.536 | -17.364  | -31.063%       | 66.715 | -6.065   | -8.334%        |
| keyboard            | 2.0      | 55.54 | -10.87   | -16.368%       | 36.771 | -19.129  | -34.221%       | 65.939 | -6.841   | -9.399%        |
| spell_error         | 2.0      | 57.9  | -8.51    | -12.814%       | 40.261 | -15.639  | -27.977%       | 66.801 | -5.979   | -8.216%        |
| random_char_insert  | 2.0      | 41.71 | -24.7    | -37.193%       | 26.491 | -29.409  | -52.611%       | 59.222 | -13.558  | -18.629%       |
| random_char_replace | 2.0      | 36.75 | -29.66   | -44.662%       | 24.288 | -31.612  | -56.550%       | 56.265 | -16.515  | -22.691%       |
| random_char_swap    | 2.0      | 32.67 | -33.74   | -50.806%       | 21.458 | -34.442  | -61.613%       | 53.036 | -19.744  | -27.129%       |
| random_char_delete  | 2.0      | 40.07 | -26.34   | -39.663%       | 26.268 | -29.632  | -53.009%       | 56.466 | -16.314  | -22.415%       |
| random_word_insert  | 2.0      | 64.71 | -1.7     | -2.560%        | 44.49  | -11.41   | -20.411%       | 70.877 | -1.903   | -2.615%        |
| random_word_delete  | 2.0      | 61.02 | -5.39    | -8.116%        | 43.719 | -12.181  | -21.790%       | 69.327 | -3.453   | -4.745%        |
| swap_syn_word_emb   | 2.0      | 55.17 | -11.24   | -16.925%       | 39.108 | -16.792  | -30.039%       | 61.389 | -11.391  | -15.651%       |
| swap_syn_word_net   | 2.0      | 58.73 | -7.68    | -11.565%       | 42.336 | -13.564  | -24.265%       | 67.246 | -5.534   | -7.604%        |
| random_word_swap    | 2.0      | 64.78 | -1.63    | -2.454%        | 46.613 | -9.287   | -16.613%       | 71.25  | -1.53    | -2.102%        |

  

| corruption          | severity | VQA   |          |                | GQA    |          |                | NLVR   |          |                |
|---------------------|----------|-------|----------|----------------|--------|----------|----------------|--------|----------|----------------|
|                     |          | Acc   | Decrease | Decrease Ratio | Acc    | Decrease | Decrease Ratio | CIDer  | Decrease | Decrease Ratio |
| ocr                 | 3.0      | 50.43 | -15.98   | -24.063%       | 30.712 | -25.188  | -45.058%       | 62.739 | -10.041  | -13.797%       |
| punctuation         | 3.0      | 65.87 | -0.54    | -0.813%        | 48.712 | -7.188   | -12.859%       | 72.585 | -0.195   | -0.268%        |
| typos               | 3.0      | 51.92 | -14.49   | -21.819%       | 32.851 | -23.049  | -41.233%       | 63.772 | -9.008   | -12.377%       |
| keyboard            | 3.0      | 49.64 | -16.77   | -25.252%       | 31.078 | -24.822  | -44.404%       | 61.964 | -10.816  | -14.862%       |
| spell_error         | 3.0      | 53.28 | -13.13   | -19.771%       | 34.036 | -21.864  | -39.113%       | 62.954 | -9.826   | -13.501%       |
| random_char_insert  | 3.0      | 34.49 | -31.92   | -48.065%       | 22.73  | -33.17   | -59.338%       | 54.241 | -18.539  | -25.472%       |
| random_char_replace | 3.0      | 31.23 | -35.18   | -52.974%       | 21.1   | -34.8    | -62.253%       | 52.476 | -20.304  | -27.898%       |
| random_char_swap    | 3.0      | 28.53 | -37.88   | -57.040%       | 19.558 | -36.342  | -65.013%       | 50.926 | -21.854  | -30.028%       |
| random_char_delete  | 3.0      | 34.21 | -32.2    | -48.487%       | 22.667 | -33.233  | -59.452%       | 53.552 | -19.228  | -26.419%       |
| random_word_insert  | 3.0      | 62.86 | -3.55    | -5.346%        | 40.547 | -15.353  | -27.465%       | 71.121 | -1.659   | -2.279%        |
| random_word_delete  | 3.0      | 58.6  | -7.81    | -11.760%       | 40.444 | -15.456  | -27.650%       | 67.131 | -5.649   | -7.762%        |
| swap_syn_word_emb   | 3.0      | 51.04 | -15.37   | -23.144%       | 33.893 | -22.007  | -39.369%       | 58.361 | -14.419  | -19.812%       |
| swap_syn_word_net   | 3.0      | 55.32 | -11.09   | -16.699%       | 38.289 | -17.611  | -31.504%       | 63.686 | -9.094   | -12.495%       |
| random_word_swap    | 3.0      | 64.14 | -2.27    | -3.418%        | 44.888 | -11.012  | -19.700%       | 69.556 | -3.224   | -4.429%        |

  

| corruption          | severity | VQA   |          |                | GQA    |          |                | NLVR   |          |                |
|---------------------|----------|-------|----------|----------------|--------|----------|----------------|--------|----------|----------------|
|                     |          | Acc   | Decrease | Decrease Ratio | Acc    | Decrease | Decrease Ratio | CIDer  | Decrease | Decrease Ratio |
| ocr                 | 4.0      | 43.45 | -22.96   | -34.573%       | 26.777 | -29.123  | -52.099%       | 58.734 | -14.046  | -19.299%       |
| punctuation         | 4.0      | 65.73 | -0.68    | -1.024%        | 48.648 | -7.252   | -12.972%       | 72.485 | -0.295   | -0.406%        |
| typos               | 4.0      | 43.92 | -22.49   | -33.865%       | 27.262 | -28.638  | -51.231%       | 59.854 | -12.926  | -17.761%       |
| keyboard            | 4.0      | 39.88 | -26.53   | -39.949%       | 25.25  | -30.65   | -54.829%       | 57.959 | -14.821  | -20.364%       |
| spell_error         | 4.0      | 45.13 | -21.28   | -32.043%       | 29.695 | -26.205  | -46.879%       | 59.94  | -12.84   | -17.643%       |
| random_char_insert  | 4.0      | 30.58 | -35.83   | -53.953%       | 20.806 | -35.094  | -62.780%       | 52.72  | -20.06   | -27.563%       |
| random_char_replace | 4.0      | 27.97 | -38.44   | -57.883%       | 19.661 | -36.239  | -64.828%       | 51.27  | -21.51   | -29.554%       |
| random_char_swap    | 4.0      | 26.83 | -39.58   | -59.599%       | 18.437 | -37.463  | -67.018%       | 50.94  | -21.84   | -30.008%       |
| random_char_delete  | 4.0      | 29.97 | -36.44   | -54.871%       | 20.544 | -35.356  | -63.249%       | 52.993 | -19.787  | -27.188%       |
| random_word_insert  | 4.0      | 60.6  | -5.81    | -8.749%        | 38.138 | -17.762  | -31.775%       | 69.7   | -3.08    | -4.232%        |
| random_word_delete  | 4.0      | 52.07 | -14.34   | -21.593%       | 35.196 | -20.704  | -37.037%       | 64.935 | -7.845   | -10.779%       |
| swap_syn_word_emb   | 4.0      | 47.34 | -19.07   | -28.716%       | 30.855 | -25.045  | -44.802%       | 56.911 | -15.869  | -21.804%       |
| swap_syn_word_net   | 4.0      | 51.87 | -14.54   | -21.894%       | 35.92  | -19.98   | -35.743%       | 59.839 | -12.941  | -17.781%       |
| random_word_swap    | 4.0      | 62.94 | -3.47    | -5.225%        | 43.632 | -12.268  | -21.947%       | 68.997 | -3.783   | -5.198%        |
